# Supplementary material for: Comparative Proteomic Analysis of Buffalo Oocytes Matured in vitro Using iTRAQ Technique
Source: PubMed Central journal article supplement (PMC4999887; doi:10.1038/srep31795), 2016-08-26
Supplement: srep31795-s1.pdf [file srep31795-s1.pdf]

## Supplementary Information

### Comparative Proteomics Analysis of Buffalo Oocyte Matured *in vitro* Using iTRAQ technique

Lingsheng Chen<sup>1,2</sup>, Linhui Zhai<sup>2,3</sup>, Chunfeng Qu<sup>1,4</sup>, Chengpu Zhang<sup>2</sup>, Sheng Li<sup>1</sup>,  
Feilin Wu<sup>2</sup>, Yingzi Qi<sup>2</sup>, Fenghua Lu<sup>1</sup>, Ping Xu<sup>2,5,\*</sup>, Xiangping Li<sup>1,\*</sup> and Deshun Shi<sup>1,\*</sup>

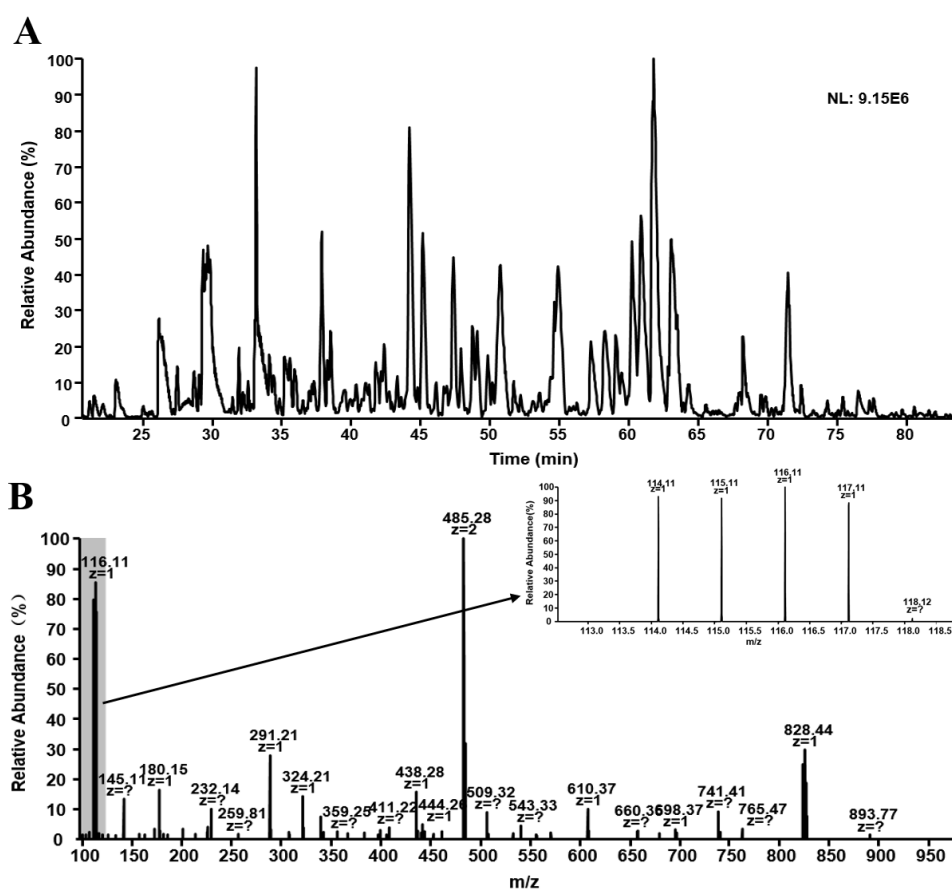

**Figure S1. Identification of mass spectrometer.** A. RP-HPLC/MS base peak ion chromatograms from iTRAQ-labeled buffalo oocytes. B. Representative MS/MS spectrum of peptide LYLTSK. The insert demonstrated iTRAQ reporter ions regions.

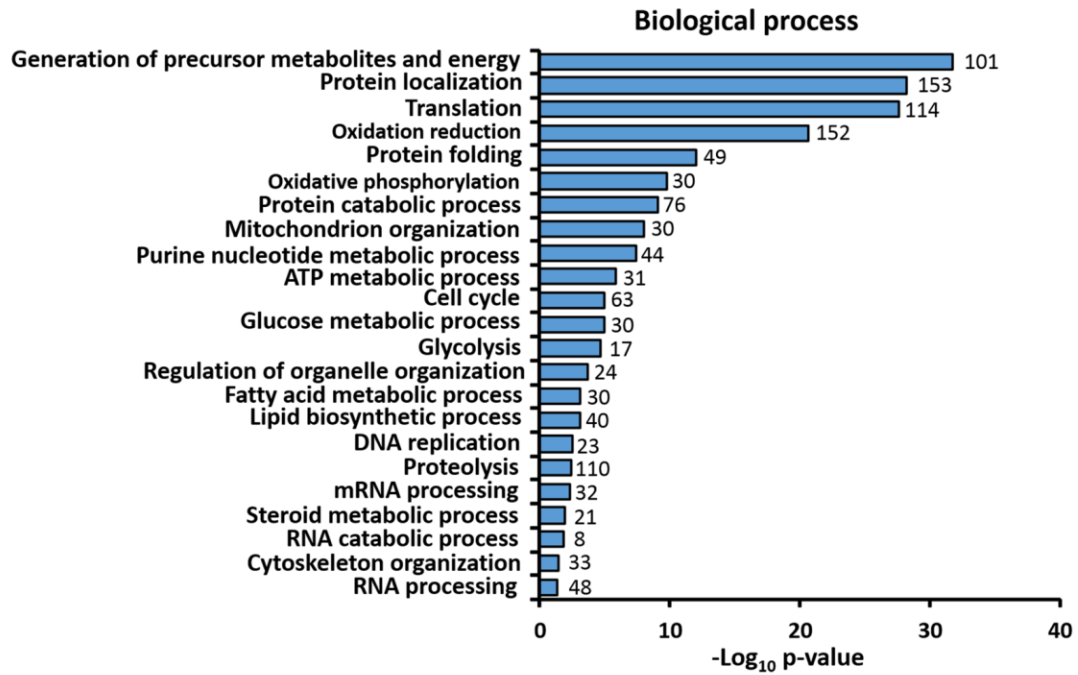

Figure S2. GO categorization of the total identified buffalo oocyte proteins.

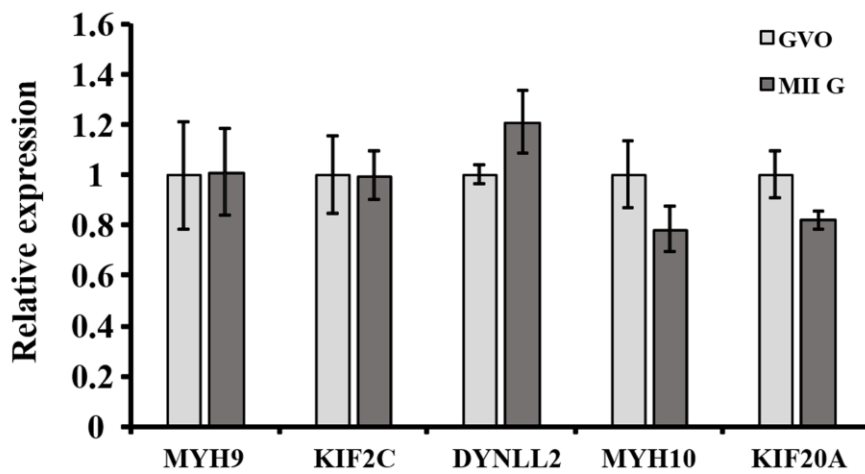

Figure S3. Validations of proteins by quantitative real-time PCR analysis. Bars represent standard errors (n=3).

**Table S1. All proteins identified in the two Biological Replicates analyzed in the iTRAQ experiment (FDR < 1%).**

| Accession number | Gene symbol | Discription                                                   | MW(kDa) | Biological Replicate 1 |                 |             | Biological Replicate 2 |                 |             |
|------------------|-------------|---------------------------------------------------------------|---------|------------------------|-----------------|-------------|------------------------|-----------------|-------------|
|                  |             |                                                               |         | Sequence coverage(%)   | Unique peptides | MS/MS count | Sequence coverage(%)   | Unique peptides | MS/MS count |
| Q0VC02           | AAAS        | Achalasia, adrenocortical insufficiency, alacrimia (Allgrove, | 60.725  | 37.1                   | 17              | 42          | 24.6                   | 12              | 34          |
| F1N412           | AACS        | Uncharacterized protein                                       | 75.02   | 17.9                   | 11              | 17          | 2.5                    | 2               | 2           |
| Q3SZK1           | AAMP        | Angio-associated migratory cell                               | 46.828  | 1.8                    | 1               | 1           | 1.8                    | 1               | 1           |
| A6QLT9           | AARS        | AARS protein                                                  | 106.65  | 19.2                   | 17              | 23          | 6                      | 6               | 13          |
| F1MKA6           | AARS2       | Uncharacterized protein                                       | 106.36  | 4.8                    | 4               | 4           | #N/A                   | #N/A            | #N/A        |
| F1MS62           | AASDHPPT    | Uncharacterized protein                                       | 35.686  | 21.7                   | 6               | 10          | #N/A                   | #N/A            | #N/A        |
| G3X771           | ABCB1       | Uncharacterized protein (Fragment)                            | 141.87  | 19.5                   | 8               | 38          | 14                     | 13              | 44          |
| E1BLT5           | ABCB4       | Uncharacterized protein                                       | 140.38  | 8.2                    | 1               | 1           | 5.5                    | 1               | 4           |
| A5D7P7           | ABCB6       | ABCB6 protein                                                 | 93.677  | 1.3                    | 1               | 1           | #N/A                   | #N/A            | #N/A        |
| E1BPL3           | ABCB7       | Uncharacterized protein                                       | 83.084  | 12.6                   | 8               | 10          | 5.7                    | 5               | 10          |
| G3MYQ9           | ABCB8       | Uncharacterized protein                                       | 77.314  | 13.7                   | 8               | 11          | 11.1                   | 8               | 15          |
| F1MY01           | ABCC1       | Multidrug resistance-associated protein 1 (Fragment)          | 169.78  | 4.4                    | 5               | 7           | 2.9                    | 5               | 7           |
| F1N3Y6           | ABCC3       | Uncharacterized protein                                       | 169.68  | 0.9                    | 1               | 2           | #N/A                   | #N/A            | #N/A        |
| F1MUC1           | ABCC4       | Uncharacterized protein (Fragment)                            | 146.97  | 7.1                    | 3               | 13          | 6.4                    | 7               | 16          |
| A7Z038           | ABCD3       | ABCD3 protein                                                 | 75.358  | 11.9                   | 8               | 13          | 16.9                   | 11              | 19          |
| A4IFE6           | ABCE1       | ABCE1 protein                                                 | 67.288  | 25                     | 14              | 20          | 9.5                    | 7               | 13          |
| E1BGH0           | ABCF1       | Uncharacterized protein                                       | 95.975  | 17.9                   | 13              | 21          | 7.9                    | 7               | 14          |
| Q2KJA2           | ABCF2       | ATP-binding cassette sub-family F                             | 71.475  | 15.7                   | 9               | 17          | 2.9                    | 2               | 3           |
| A4FUE2           | ABCF3       | ABCF3 protein                                                 | 79.765  | 3                      | 1               | 1           | 2.4                    | 2               | 2           |
| Q4GZT4           | ABCG2       | ATP-binding cassette sub-family G                             | 72.724  | 6                      | 4               | 9           | 3.5                    | 3               | 5           |
| Q5E9H9           | ABHD10      | Mycophenolic acid acyl-glucuronide esterase, mitochondrial    | 33.982  | 28.4                   | 7               | 10          | 19.6                   | 6               | 11          |
| Q3SZ73           | ABHD11      | Alpha/beta hydrolase domain-containing protein 11             | 33.548  | 6.9                    | 2               | 3           | 2.3                    | 1               | 2           |
| Q08DW9           | ABHD12      | Monoacylglycerol lipase ABHD12                                | 45.219  | 39.4                   | 13              | 30          | 13.8                   | 6               | 18          |
| F1MR63           | ABHD14A     | Uncharacterized protein                                       | 55.519  | 17.4                   | 7               | 10          | #N/A                   | #N/A            | #N/A        |
| A7YY28           | ABHD14B     | Alpha/beta hydrolase domain-containing protein 14B            | 22.455  | 24.3                   | 5               | 6           | 19.5                   | 4               | 9           |

| Accession number | Gene symbol | Discription                                                         | MW(kDa) | Biological Replicate 1 |                 |             | Biological Replicate 2 |                 |             |
|------------------|-------------|---------------------------------------------------------------------|---------|------------------------|-----------------|-------------|------------------------|-----------------|-------------|
|                  |             |                                                                     |         | Sequence coverage(%)   | Unique peptides | MS/MS count | Sequence coverage(%)   | Unique peptides | MS/MS count |
| Q1JPD2           | ABHD16A     | Abhydrolase domain-containing                                       | 63.304  | 7                      | 4               | 5           | 5.9                    | 3               | 5           |
| Q5EA59           | ABHD4       | Abhydrolase domain-containing                                       | 38.797  | 3.5                    | 1               | 1           | #N/A                   | #N/A            | #N/A        |
| Q1LZ86           | ABHD6       | Monoacylglycerol lipase ABHD6                                       | 38.352  | 6.2                    | 2               | 3           | 6.2                    | 3               | 3           |
| Q0VCW2           | ABI1        | Abl-interactor 1                                                    | 38.83   | 8.5                    | 2               | 6           | 9.3                    | 2               | 6           |
| A7MB24           | ABI2        | ABI2 protein                                                        | 52.372  | 4                      | 1               | 2           | #N/A                   | #N/A            | #N/A        |
| F1MWH8           | ABL2        | Uncharacterized protein                                             | 128.04  | 1.6                    | 2               | 2           | #N/A                   | #N/A            | #N/A        |
| Q3ZBN0           | ABRACL      | Costars family protein ABRACL                                       | 9.0464  | 16                     | 1               | 1           | #N/A                   | #N/A            | #N/A        |
| Q3ZC41           | ACAA1       | Acetyl-Coenzyme A acyltransferase 1                                 | 44.333  | 53.3                   | 15              | 51          | 18.4                   | 6               | 21          |
| Q3TOR7           | ACAA2       | 3-ketoacyl-CoA thiolase,                                            | 42.131  | 51.4                   | 18              | 61          | 33.8                   | 11              | 38          |
| E1BGS2           | ACAD10      | Uncharacterized protein                                             | 117.62  | 2.6                    | 3               | 7           | 2.5                    | 3               | 5           |
| Q0NXR6           | ACAD8       | Isobutyryl-CoA dehydrogenase, mitochondrial                         | 45.307  | 16.1                   | 6               | 10          | 14.4                   | 6               | 16          |
| F1NOA4           | ACAD9       | Uncharacterized protein                                             | 68.189  | 40.2                   | 24              | 41          | 32.1                   | 19              | 44          |
| Q3SZB4           | ACADM       | Medium-chain specific acyl-CoA dehydrogenase, mitochondrial         | 46.573  | 34.9                   | 12              | 23          | 19.7                   | 9               | 16          |
| F1MVL2           | ACADS       | Short-chain-specific acyl-CoA dehydrogenase, mitochondrial          | 44.387  | 35                     | 1               | 40          | 21.1                   | 1               | 38          |
| Q5EAD4           | ACADSB      | Short/branched chain specific acyl-CoA dehydrogenase, mitochondrial | 47.123  | 29.4                   | 11              | 25          | 15.3                   | 6               | 17          |
| P48818           | ACADVL      | Very long-chain specific acyl-CoA dehydrogenase, mitochondrial      | 70.648  | 42.7                   | 21              | 34          | 20.6                   | 12              | 18          |
| Q29RZ0           | ACAT1       | Acetyl-CoA acetyltransferase, mitochondrial                         | 44.889  | 52.8                   | 17              | 87          | 30.6                   | 12              | 64          |
| Q17QI3           | ACAT2       | Acetyl-Coenzyme A acetyltransferase                                 | 41.17   | 52.4                   | 17              | 60          | 23.4                   | 9               | 25          |
| F1MRE5           | ACBD3       | Uncharacterized protein                                             | 60.581  | 17.6                   | 8               | 13          | 8.7                    | 5               | 10          |
| F1MBE7           | ACCSL       | Uncharacterized protein (Fragment)                                  | 66.603  | 66.2                   | 32              | 146         | 22.3                   | 15              | 70          |
| F1MQJ0           | ACE         | Angiotensin-converting enzyme                                       | 141.24  | 1.7                    | 2               | 2           | #N/A                   | #N/A            | #N/A        |
| Q32PF2           | ACLY        | ATP-citrate synthase                                                | 119.79  | 25.9                   | 27              | 48          | 9.4                    | 12              | 22          |
| Q0VCU1           | AC01        | Cytoplasmic aconitate hydratase                                     | 98.203  | 10.1                   | 8               | 8           | #N/A                   | #N/A            | #N/A        |
| P20004           | AC02        | Aconitate hydratase, mitochondrial                                  | 85.358  | 59                     | 39              | 103         | 39.7                   | 27              | 75          |
| E1BMF5           | ACOT11      | Uncharacterized protein (Fragment)                                  | 66.986  | 11.5                   | 6               | 7           | 3                      | 2               | 5           |
| F1N234           | ACOT2       | Uncharacterized protein                                             | 50.89   | #N/A                   | #N/A            | #N/A        | 4.1                    | 2               | 2           |



| Accession number | Gene symbol | Discription                                                    | MW(kDa) | Biological Replicate 1 |                 |             | Biological Replicate 2 |                 |             |
|------------------|-------------|----------------------------------------------------------------|---------|------------------------|-----------------|-------------|------------------------|-----------------|-------------|
|                  |             |                                                                |         | Sequence coverage(%)   | Unique peptides | MS/MS count | Sequence coverage(%)   | Unique peptides | MS/MS count |
| F6Q5U0           | ACOT7       | Uncharacterized protein                                        | 40.838  | 2.9                    | 1               | 1           | #N/A                   | #N/A            | #N/A        |
| F6RWU6           | ACOT8       | Uncharacterized protein                                        | 35.679  | 10.7                   | 3               | 4           | #N/A                   | #N/A            | #N/A        |
| Q3SWX2           | ACOT9       | Acyl-coenzyme A thioesterase 9, mitochondrial                  | 49.852  | 29.5                   | 12              | 24          | 16.7                   | 8               | 16          |
| Q3SZP5           | ACOX1       | Peroxisomal acyl-coenzyme A oxidase                            | 74.378  | 4.8                    | 3               | 3           | 7.1                    | 5               | 9           |
| F1MQG3           | ACOX3       | Acyl-coenzyme A oxidase                                        | 70.656  | 2.5                    | 1               | 1           | #N/A                   | #N/A            | #N/A        |
| A5PK96           | ACP1        | ACP1 protein                                                   | 18.169  | 44.9                   | 2               | 27          | 22.2                   | 2               | 23          |
| A6H757           | ACP6        | Lysophosphatidic acid phosphatase                              | 48.944  | 6.5                    | 3               | 3           | 2.3                    | 1               | 2           |
| Q58DN7           | ACSF3       | Acyl-CoA synthetase family member 3, mitochondrial             | 64.989  | 3.4                    | 2               | 2           | 1.7                    | 1               | 1           |
| F1MEX9           | ACSL3       | Uncharacterized protein                                        | 80.353  | 41.9                   | 21              | 55          | 21.5                   | 11              | 33          |
| F1MBW3           | ACSL4       | Uncharacterized protein (Fragment)                             | 80.609  | 36.1                   | 20              | 34          | 21.1                   | 13              | 60          |
| Q1LZF6           | ACSL5       | Acyl-CoA synthetase long-chain family member 5                 | 76.027  | 34.4                   | 20              | 41          | 16.8                   | 11              | 36          |
| Q2TA22           | ACSL6       | Acyl-CoA synthetase long-chain family member 6                 | 78.042  | 18.9                   | 11              | 20          | 14.6                   | 9               | 19          |
| F1MQV8           | ACSS3       | Acyl-CoA synthetase short-chain family member 3, mitochondrial | 74.744  | 7.6                    | 4               | 6           | 5.2                    | 4               | 5           |
| Q3ZC07           | ACTC1       | Actin, alpha cardiac muscle 1                                  | 42.019  | 34                     | 1               | 21          | 32.4                   | 1               | 7           |
| P63258           | ACTG1       | Actin, cytoplasmic 2                                           | 41.792  | 74.7                   | 12              | 609         | 61.1                   | 9               | 320         |
| A4IFJ8           | ACTL6A      | ACTL6A protein                                                 | 47.444  | 8.2                    | 3               | 3           | 4.7                    | 2               | 4           |
| Q3B7N2           | ACTN1       | Alpha-actinin-1                                                | 102.98  | 54.7                   | 23              | 61          | 29.8                   | 13              | 29          |
| Q3ZC55           | ACTN2       | Alpha-actinin-2                                                | 103.78  | 19.1                   | 1               | 1           | #N/A                   | #N/A            | #N/A        |
| A5D7D1           | ACTN4       | Alpha-actinin-4                                                | 104.93  | 61.3                   | 37              | 165         | 37.5                   | 19              | 93          |
| Q3ZBD2           | ACTR10      | Actin-related protein 10                                       | 46.296  | 19.9                   | 7               | 12          | 3.6                    | 2               | 5           |
| F2Z4F0           | ACTR1A      | Uncharacterized protein                                        | 42.613  | 35.4                   | 6               | 17          | 15.4                   | 2               | 4           |
| A4IFE3           | ACTR1B      | Beta-centractin                                                | 42.294  | 27.4                   | 4               | 6           | 20.2                   | 3               | 14          |
| A7MB62           | ACTR2       | Actin-related protein 2                                        | 44.76   | 43.4                   | 15              | 51          | 26.4                   | 11              | 43          |
| P61157           | ACTR3       | Actin-related protein 3                                        | 47.371  | 63.2                   | 18              | 92          | 33.5                   | 11              | 50          |
| F1N6J8           | ACTR3C      | Uncharacterized protein (Fragment)                             | 46.546  | 18.4                   | 3               | 7           | 12.5                   | 2               | 2           |
| Q3TOV2           | ACY1        | Aminoacylase 1                                                 | 41.753  | #N/A                   | #N/A            | #N/A        | 8.8                    | 4               | 9           |
| P56658           | ADA         | Adenosine deaminase                                            | 40.919  | 13.5                   | 5               | 6           | 8                      | 3               | 5           |

| Accession number | Gene symbol | Discription                                                                                     | MW(kDa) | Biological Replicate 1 |                 |             | Biological Replicate 2 |                 |             |
|------------------|-------------|-------------------------------------------------------------------------------------------------|---------|------------------------|-----------------|-------------|------------------------|-----------------|-------------|
|                  |             |                                                                                                 |         | Sequence coverage(%)   | Unique peptides | MS/MS count | Sequence coverage(%)   | Unique peptides | MS/MS count |
| F1N4S1           | ADAD2       | Uncharacterized protein (Fragment)                                                              | 61.818  | 1.7                    | 1               | 1           | #N/A                   | #N/A            | #N/A        |
| Q0VC13           | ADAL        | Adenosine deaminase-like protein                                                                | 39.646  | 9.7                    | 3               | 4           | #N/A                   | #N/A            | #N/A        |
| Q10741           | ADAM10      | Disintegrin and metalloproteinase domain-containing protein 10                                  | 84.188  | 4.4                    | 3               | 10          | 1.3                    | 1               | 2           |
| E1B867           | ADAM17      | Uncharacterized protein                                                                         | 92.861  | 1.6                    | 1               | 1           | #N/A                   | #N/A            | #N/A        |
| F1ME22           | ADAM19      | Uncharacterized protein                                                                         | 99.846  | #N/A                   | #N/A            | #N/A        | 2.1                    | 2               | 2           |
| Q29RI0           | ADCK3       | Chaperone activity of bcl complex-like, mitochondrial                                           | 72.082  | 4                      | 2               | 3           | #N/A                   | #N/A            | #N/A        |
| Q3ZC42           | ADH5        | Alcohol dehydrogenase class-3                                                                   | 39.677  | 46.8                   | 15              | 61          | 26.2                   | 10              | 56          |
| F1N468           | ADK         | Uncharacterized protein                                                                         | 38.532  | 6.4                    | 2               | 3           | #N/A                   | #N/A            | #N/A        |
| A2VE47           | ADPGK       | ADP-dependent glucokinase                                                                       | 54.085  | 7.6                    | 3               | 5           | 4.8                    | 2               | 5           |
| Q3SYV9           | ADPRHL2     | Poly(ADP-ribose) glycohydrolase                                                                 | 39.221  | 10.7                   | 3               | 7           | 2.7                    | 1               | 1           |
| A1L5A6           | ADRM1       | Proteasomal ubiquitin receptor                                                                  | 41.954  | 14.7                   | 6               | 11          | 10.1                   | 4               | 7           |
| F1MHP6           | ADSL        | Adenylosuccinate lyase                                                                          | 55.467  | 58                     | 21              | 48          | 10                     | 5               | 17          |
| A7MBG0           | ADSS        | Adenylosuccinate synthetase isozyme                                                             | 50.156  | 45                     | 21              | 71          | 28.3                   | 13              | 42          |
| F1MXK1           | AES         | Uncharacterized protein (Fragment)                                                              | 35.043  | 9.4                    | 3               | 3           | #N/A                   | #N/A            | #N/A        |
| Q2KJI7           | AFG3L2      | AFG3-like protein 2                                                                             | 89.387  | 48.1                   | 34              | 93          | 26.7                   | 22              | 74          |
| E1BLL5           | AFMID       | Kynurenine formamidase                                                                          | 34.334  | 3.9                    | 1               | 1           | #N/A                   | #N/A            | #N/A        |
| F1MGY9           | AGA         | Uncharacterized protein (Fragment)                                                              | 37.107  | 10.3                   | 3               | 5           | #N/A                   | #N/A            | #N/A        |
| Q2TA45           | AGFG1       | Arf-GAP domain and FG repeat-containing protein 1                                               | 58.133  | 16                     | 5               | 12          | 7.3                    | 4               | 4           |
| F1MS35           | AGFG2       | Uncharacterized protein                                                                         | 48.182  | 3.6                    | 1               | 1           | #N/A                   | #N/A            | #N/A        |
| A6QR07           | AGK         | AGK protein                                                                                     | 46.745  | 38.6                   | 11              | 28          | 18.8                   | 8               | 19          |
| Q95JH2           | AGPAT1      | 1-acyl-sn-glycerol-3-phosphate acyltransferase alpha                                            | 32.005  | 19.9                   | 4               | 6           | 16                     | 4               | 8           |
| G5E5P6           | AGPAT3      | Uncharacterized protein                                                                         | 43.391  | 5.9                    | 2               | 4           | #N/A                   | #N/A            | #N/A        |
| Q0IID8           | AGPAT5      | 1-acylglycerol-3-phosphate 0-acyltransferase 5 (Lysophosphatidic acid acyltransferase, epsilon) | 33.571  | 22.3                   | 7               | 11          | 6.2                    | 2               | 2           |
| A6H7D4           | AGPAT6      | 1-acylglycerol-3-phosphate 0-acyltransferase 6 (Lysophosphatidic acid acyltransferase, zeta)    | 52.065  | 9.2                    | 3               | 3           | 4.6                    | 2               | 2           |

| Accession number | Gene symbol | Discription                                                          | MW(kDa) | Biological Replicate 1 |                 |             | Biological Replicate 2 |                 |             |
|------------------|-------------|----------------------------------------------------------------------|---------|------------------------|-----------------|-------------|------------------------|-----------------|-------------|
|                  |             |                                                                      |         | Sequence coverage(%)   | Unique peptides | MS/MS count | Sequence coverage(%)   | Unique peptides | MS/MS count |
| E1BGF8           | AGPAT9      | Uncharacterized protein                                              | 49.254  | 3                      | 1               | 1           | #N/A                   | #N/A            | #N/A        |
| E1BPV2           | AGPS        | Uncharacterized protein (Fragment)                                   | 64.874  | 29.9                   | 16              | 28          | 14.6                   | 8               | 18          |
| Q17QI4           | AGTRAP      | Angiotensin II receptor-associated                                   | 16.552  | #N/A                   | #N/A            | #N/A        | 5.4                    | 1               | 4           |
| Q3MHL4           | AHCY        | Adenosylhomocysteinase                                               | 47.637  | 51.6                   | 24              | 159         | 44.2                   | 20              | 116         |
| F1MWH2           | AHCYL1      | Adenosylhomocysteinase                                               | 58.951  | 17.2                   | 2               | 3           | 6.4                    | 2               | 8           |
| A6QLP2           | AHCYL2      | Adenosylhomocysteinase                                               | 66.773  | 13.7                   | 1               | 17          | #N/A                   | #N/A            | #N/A        |
| Q3TOG3           | AHSA1       | AHA1, activator of heat shock 90kDa protein ATPase homolog 1 (Yeast) | 38.241  | 37.9                   | 11              | 20          | 16.9                   | 6               | 12          |
| E1BG08           | AIDA        | Uncharacterized protein                                              | 34.995  | 23.5                   | 9               | 15          | 11.1                   | 3               | 3           |
| E1BJA2           | AIFM1       | Uncharacterized protein                                              | 66.871  | 35.2                   | 18              | 46          | 25                     | 14              | 50          |
| F1MW53           | AIG1        | Uncharacterized protein                                              | 27.326  | #N/A                   | #N/A            | #N/A        | 3.8                    | 1               | 1           |
| E1BH02           | AIM1        | Uncharacterized protein                                              | 187.58  | 1.8                    | 2               | 2           | 1.9                    | 3               | 4           |
| Q0II26           | AIMP2       | Aminoacyl tRNA synthase complex-interacting multifunctional protein  | 35.178  | 25                     | 7               | 13          | 7.2                    | 3               | 5           |
| Q3SZ99           | AIP         | AH receptor-interacting protein                                      | 37.59   | 29.4                   | 9               | 18          | 17.9                   | 5               | 6           |
| P00570           | AK1         | Adenylate kinase isoenzyme 1                                         | 21.664  | 55.2                   | 10              | 38          | 27.8                   | 5               | 10          |
| P08760           | AK3         | GTP:AMP phosphotransferase AK3, mitochondrial                        | 25.671  | 68.3                   | 15              | 32          | 34.4                   | 8               | 19          |
| Q0VCP1           | AK4         | Adenylate kinase 4, mitochondrial                                    | 25.348  | 53.4                   | 13              | 62          | 37.2                   | 9               | 45          |
| E1BM36           | AKAP1       | Uncharacterized protein                                              | 88.593  | 17.2                   | 12              | 20          | 9.6                    | 7               | 11          |
| A5D7T9           | AKAP10      | AKAP10 protein                                                       | 67.914  | 11.6                   | 6               | 10          | 3.3                    | 2               | 2           |
| A8YXY8           | AKIRIN2     | Akirin-2                                                             | 22.509  | 5.9                    | 1               | 2           | 10.8                   | 2               | 2           |
| Q3ZCJ2           | AKR1A1      | Alcohol dehydrogenase [NADP(+)]                                      | 36.617  | 69.5                   | 22              | 91          | 45.2                   | 17              | 55          |
| P16116           | AKR1B1      | Aldose reductase                                                     | 35.919  | 85.4                   | 1               | 1           | 60.3                   | 1               | 202         |
| F1N678           | AKR1B10     | Uncharacterized protein                                              | 35.549  | 5.5                    | 2               | 19          | 2.6                    | 1               | 16          |
| F1MZC0           | AKR7A2      | Uncharacterized protein (Fragment)                                   | 30.045  | 55.3                   | 12              | 43          | 24.4                   | 6               | 21          |
| F1MYJ4           | AKT3        | Uncharacterized protein                                              | 55.774  | 1.9                    | 1               | 1           | #N/A                   | #N/A            | #N/A        |
| Q58DK5           | ALAD        | Delta-aminolevulinic acid                                            | 36.081  | 20.4                   | 5               | 8           | 11.2                   | 3               | 4           |
| Q2KJH7           | ALDH18A1    | Aldehyde dehydrogenase 18 family, member A1                          | 87.193  | 17.4                   | 13              | 20          | 7.3                    | 6               | 12          |
| P48644           | ALDH1A1     | Retinal dehydrogenase 1                                              | 54.805  | 28.9                   | 11              | 22          | 9                      | 4               | 9           |
| P20000           | ALDH2       | Aldehyde dehydrogenase,                                              | 56.652  | 37.3                   | 14              | 27          | 9.8                    | 5               | 19          |

| Accession number | Gene symbol | Discription                                                                   | MW(kDa) | Biological Replicate 1 |                 |             | Biological Replicate 2 |                 |             |
|------------------|-------------|-------------------------------------------------------------------------------|---------|------------------------|-----------------|-------------|------------------------|-----------------|-------------|
|                  |             |                                                                               |         | Sequence coverage(%)   | Unique peptides | MS/MS count | Sequence coverage(%)   | Unique peptides | MS/MS count |
| A6QQT4           | ALDH3A2     | Aldehyde dehydrogenase                                                        | 54.075  | 25.8                   | 10              | 10          | 21.2                   | 9               | 26          |
| A7YWE4           | ALDH4A1     | Delta-1-pyrroline-5-carboxylate dehydrogenase, mitochondrial                  | 61.495  | 40                     | 22              | 49          | 25.9                   | 15              | 42          |
| E1BDP3           | ALDH5A1     | Uncharacterized protein                                                       | 56.096  | 1.7                    | 1               | 1           | #N/A                   | #N/A            | #N/A        |
| E1BFG0           | ALDH7A1     | Alpha-aminoadipic semialdehyde dehydrogenase                                  | 58.595  | 54                     | 29              | 130         | 43                     | 21              | 85          |
| A6QLL8           | ALDOA       | Fructose-bisphosphate aldolase                                                | 39.436  | 69.5                   | 16              | 63          | 54.7                   | 17              | 60          |
| Q3ZBY4           | ALDOC       | Fructose-bisphosphate aldolase                                                | 39.381  | 71.7                   | 18              | 69          | 33.2                   | 12              | 32          |
| F1N2J7           | ALG1        | Uncharacterized protein                                                       | 51.899  | #N/A                   | #N/A            | #N/A        | 2.8                    | 1               | 1           |
| E1B756           | ALG11       | Uncharacterized protein (Fragment)                                            | 56.529  | 3                      | 2               | 4           | 2.8                    | 1               | 1           |
| G3MWZ3           | ALG12       | Uncharacterized protein                                                       | 54.553  | 3.5                    | 1               | 2           | #N/A                   | #N/A            | #N/A        |
| Q17QD5           | ALG14       | Asparagine-linked glycosylation 14                                            | 18.799  | 11.6                   | 2               | 2           | 4.6                    | 1               | 2           |
| A4FUG6           | ALG2        | ALG2 protein                                                                  | 46.831  | 22.4                   | 8               | 22          | 8.4                    | 4               | 9           |
| A4FV21           | ALG3        | ALG3 protein                                                                  | 49.889  | 6.8                    | 3               | 3           | 2.3                    | 1               | 1           |
| F6QF86           | ALG6        | Uncharacterized protein                                                       | 58.304  | 3.9                    | 2               | 4           | 4.7                    | 3               | 8           |
| Q0P5D9           | ALG8        | Probable dolichyl pyrophosphate Glc1Man9GlcNAc2 alpha-1,3-glucosyltransferase | 59.963  | 6.7                    | 4               | 4           | 3.2                    | 2               | 2           |
| E1BA58           | ALG9        | Uncharacterized protein                                                       | 69.851  | 10.6                   | 4               | 4           | #N/A                   | #N/A            | #N/A        |
| P09487           | ALPL        | Alkaline phosphatase, tissue-nonspecific isozyme                              | 57.192  | 4.8                    | 2               | 3           | 8                      | 4               | 8           |
| F1MCN8           | AMACR       | Uncharacterized protein                                                       | 42.126  | 16.5                   | 7               | 12          | 11.5                   | 4               | 8           |
| A7MBC0           | AMDHD2      | Putative N-acetylglucosamine-6-phosphate deacetylase                          | 43.495  | 4.6                    | 2               | 3           | 2.4                    | 1               | 2           |
| A6QPH6           | AMICA1      | AMICA1 protein                                                                | 43.026  | #N/A                   | #N/A            | #N/A        | 6.8                    | 3               | 6           |
| E1BEQ5           | AMOTL1      | Angiomotin-like protein 1                                                     | 106.67  | #N/A                   | #N/A            | #N/A        | 1.5                    | 1               | 2           |
| E1BLG8           | AMPD2       | Uncharacterized protein                                                       | 92.125  | 7                      | 5               | 6           | 2.3                    | 2               | 3           |
| E1BA23           | AMPD3       | Uncharacterized protein (Fragment)                                            | 89.265  | 4.3                    | 4               | 4           | #N/A                   | #N/A            | #N/A        |
| P25285           | AMT         | Aminomethyltransferase,                                                       | 42.868  | 2                      | 1               | 2           | #N/A                   | #N/A            | #N/A        |
| E1B9T4           | AMZ1        | Uncharacterized protein                                                       | 54.157  | 1.6                    | 1               | 1           | #N/A                   | #N/A            | #N/A        |
| F1MH25           | AMZ2        | Uncharacterized protein                                                       | 38.099  | 2.4                    | 1               | 1           | #N/A                   | #N/A            | #N/A        |
| E1BAB6           | ANAPC1      | Uncharacterized protein                                                       | 217.03  | #N/A                   | #N/A            | #N/A        | 0.5                    | 1               | 1           |

| Accession number | Gene symbol | Discription                                                   | MW(kDa) | Biological Replicate 1 |                 |             | Biological Replicate 2 |                 |             |
|------------------|-------------|---------------------------------------------------------------|---------|------------------------|-----------------|-------------|------------------------|-----------------|-------------|
|                  |             |                                                               |         | Sequence coverage(%)   | Unique peptides | MS/MS count | Sequence coverage(%)   | Unique peptides | MS/MS count |
| E1B945           | ANAPC4      | Uncharacterized protein                                       | 91.976  | 2                      | 1               | 1           | #N/A                   | #N/A            | #N/A        |
| G3N3N0           | ANK2        | Uncharacterized protein (Fragment)                            | 154.12  | 5.3                    | 5               | 7           | 2.4                    | 2               | 2           |
| F1MD79           | ANKFY1      | Uncharacterized protein (Fragment)                            | 130.05  | 28.4                   | 29              | 68          | 9.8                    | 12              | 30          |
| E1BFD1           | ANKLE2      | Uncharacterized protein                                       | 106.24  | 1.3                    | 1               | 1           | #N/A                   | #N/A            | #N/A        |
| Q0VCS9           | ANKMY2      | Ankyrin repeat and MYND domain-containing protein 2           | 49.407  | #N/A                   | #N/A            | #N/A        | 2.5                    | 1               | 1           |
| E1BAT5           | ANKRD11     | Uncharacterized protein                                       | 290.46  | #N/A                   | #N/A            | #N/A        | 0.3                    | 1               | 1           |
| F1N545           | ANKRD13A    | Uncharacterized protein                                       | 67.497  | 2                      | 1               | 2           | #N/A                   | #N/A            | #N/A        |
| F1MI56           | ANKRD17     | Uncharacterized protein                                       | 275.01  | 1.1                    | 2               | 2           | #N/A                   | #N/A            | #N/A        |
| F1N642           | ANKRD27     | Uncharacterized protein                                       | 117.12  | 1.2                    | 1               | 1           | #N/A                   | #N/A            | #N/A        |
| G3X683           | ANKRD29     | Uncharacterized protein (Fragment)                            | 31.733  | 2.7                    | 1               | 2           | 2.7                    | 1               | 4           |
| A6QQP9           | ANKRD40     | ANKRD40 protein                                               | 40.558  | 5.5                    | 2               | 2           | #N/A                   | #N/A            | #N/A        |
| Q5EA33           | ANKRD49     | Ankyrin repeat domain-containing protein 49                   | 27.196  | 5.5                    | 1               | 1           | #N/A                   | #N/A            | #N/A        |
| F1MBT6           | ANLN        | Uncharacterized protein (Fragment)                            | 124.56  | 2.1                    | 2               | 2           | 0.9                    | 1               | 1           |
| F1MX70           | ANO10       | Anoctamin (Fragment)                                          | 64.039  | 23.3                   | 13              | 23          | 14.8                   | 10              | 19          |
| F1MZ46           | ANP32B      | Acidic leucine-rich nuclear phosphoprotein 32 family member B | 17.31   | 50                     | 7               | 14          | 12.3                   | 2               | 5           |
| P46193           | ANXA1       | Annexin A1                                                    | 38.951  | 11.8                   | 4               | 5           | #N/A                   | #N/A            | #N/A        |
| F1MB53           | ANXA10      | Uncharacterized protein                                       | 36.975  | 3.1                    | 1               | 1           | #N/A                   | #N/A            | #N/A        |
| P27214           | ANXA11      | Annexin A11                                                   | 54.018  | 39.2                   | 20              | 46          | 30.6                   | 14              | 44          |
| P04272           | ANXA2       | Annexin A2                                                    | 38.612  | 49                     | 14              | 25          | 19.8                   | 7               | 14          |
| P13214           | ANXA4       | Annexin A4                                                    | 35.888  | 20.1                   | 5               | 5           | #N/A                   | #N/A            | #N/A        |
| F6QVC9           | ANXA5       | Annexin                                                       | 36.074  | 72.3                   | 1               | 81          | 32.1                   | 10              | 23          |
| P79134           | ANXA6       | Annexin A6                                                    | 75.907  | 18.3                   | 12              | 21          | 9.4                    | 6               | 8           |
| P20072           | ANXA7       | Annexin A7                                                    | 49.94   | 17.3                   | 7               | 9           | 8.9                    | 3               | 4           |
| F1MIF2           | AP1B1       | Uncharacterized protein                                       | 104.15  | 43.2                   | 18              | 31          | 16.2                   | 9               | 19          |
| F1MF68           | AP1G1       | Uncharacterized protein                                       | 91.396  | 20.1                   | 16              | 30          | 12.9                   | 12              | 24          |
| A8E4N0           | AP1G2       | AP1G2 protein                                                 | 72.355  | 8.8                    | 5               | 7           | 1.5                    | 1               | 2           |
| Q2KJ81           | AP1M1       | AP-1 complex subunit mu-1                                     | 48.586  | 14.2                   | 2               | 2           | #N/A                   | #N/A            | #N/A        |
| Q3SYW1           | AP1M2       | AP-1 complex subunit mu-2                                     | 48.149  | 31.9                   | 10              | 25          | 13                     | 6               | 8           |
| Q1JQ98           | AP1S1       | AP-1 complex subunit sigma-1A                                 | 18.602  | 29.9                   | 5               | 8           | 5.7                    | 1               | 1           |

| Accession number | Gene symbol | Discription                                                                             | MW(kDa) | Biological Replicate 1 |                 |             | Biological Replicate 2 |                 |             |
|------------------|-------------|-----------------------------------------------------------------------------------------|---------|------------------------|-----------------|-------------|------------------------|-----------------|-------------|
|                  |             |                                                                                         |         | Sequence coverage(%)   | Unique peptides | MS/MS count | Sequence coverage(%)   | Unique peptides | MS/MS count |
| Q0VCK5           | AP2A2       | AP-2 complex subunit alpha-2                                                            | 103.77  | 47.2                   | 25              | 101         | 26.4                   | 14              | 64          |
| P63009           | AP2B1       | AP-2 complex subunit beta                                                               | 104.57  | 46.4                   | 22              | 102         | 17.8                   | 10              | 59          |
| Q3ZC13           | AP2M1       | AP-2 complex subunit mu                                                                 | 49.654  | 47.1                   | 20              | 42          | 31.5                   | 14              | 41          |
| Q17QC5           | AP2S1       | AP-2 complex subunit sigma                                                              | 17.018  | 29.6                   | 4               | 8           | 4.9                    | 1               | 1           |
| Q32PG1           | AP3B1       | AP-3 complex subunit beta-1                                                             | 119.97  | 18.7                   | 17              | 30          | 10.9                   | 9               | 20          |
| E1BME2           | AP3B2       | Uncharacterized protein                                                                 | 119.52  | 2.8                    | 1               | 1           | 2.8                    | 1               | 2           |
| Q865S1           | AP3D1       | AP-3 complex subunit delta-1                                                            | 136.39  | 15.1                   | 12              | 15          | 2.5                    | 3               | 3           |
| Q24K11           | AP3M1       | AP-3 complex subunit mu-1                                                               | 46.897  | #N/A                   | #N/A            | #N/A        | 6.7                    | 3               | 3           |
| E1B763           | AP3M2       | Uncharacterized protein                                                                 | 47.005  | 10.5                   | 2               | 5           | #N/A                   | #N/A            | #N/A        |
| Q2YDH6           | AP3S1       | AP-3 complex subunit sigma-1                                                            | 21.732  | 29                     | 5               | 11          | 19.2                   | 4               | 6           |
| F1MUW4           | APAF1       | Uncharacterized protein (Fragment)                                                      | 142.04  | 7.6                    | 9               | 13          | 2                      | 3               | 4           |
| Q3T004           | APCS        | Serum amyloid P-component                                                               | 25.183  | 5.8                    | 2               | 2           | #N/A                   | #N/A            | #N/A        |
| P80227           | APEH        | Acylamino-acid-releasing enzyme                                                         | 81.092  | 31.9                   | 18              | 33          | 12.3                   | 9               | 17          |
| P23196           | APEX1       | DNA-(apurinic or apyrimidinic site)                                                     | 35.569  | 8.5                    | 2               | 4           | #N/A                   | #N/A            | #N/A        |
| Q0VCJ2           | APIP        | Methylthioribulose-1-phosphate                                                          | 27.095  | 16.5                   | 3               | 3           | #N/A                   | #N/A            | #N/A        |
| A0JNH9           | APLF        | Aprataxin and PNK-like factor                                                           | 54.325  | 2.5                    | 1               | 2           | 6                      | 3               | 5           |
| F1N226           | APLP2       | Uncharacterized protein (Fragment)                                                      | 83.898  | 5.1                    | 3               | 4           | 4.9                    | 4               | 8           |
| Q3T0E5           | APMAP       | Adipocyte plasma membrane-associated protein                                            | 46.09   | 50.5                   | 21              | 58          | 37.1                   | 16              | 43          |
| Q6QRN6           | APOA1BP     | NAD(P)H-hydrate epimerase                                                               | 31.363  | 37.2                   | 10              | 41          | 29.9                   | 8               | 41          |
| Q3SYR3           | APOBEC2     | Probable C->U-editing enzyme                                                            | 25.962  | 3.1                    | 1               | 1           | #N/A                   | #N/A            | #N/A        |
| P19035           | APOC3       | Apolipoprotein C-III                                                                    | 10.692  | #N/A                   | #N/A            | #N/A        | 16.7                   | 1               | 1           |
| Q148H0           | APO0        | Apolipoprotein 0                                                                        | 22.562  | 24.2                   | 5               | 11          | 14.1                   | 3               | 18          |
| Q1RMW4           | APPL2       | Adaptor protein, phosphotyrosine interaction, PH domain and leucine zipper containing 2 | 73.972  | 11.8                   | 6               | 6           | 3                      | 2               | 2           |
| Q56JW4           | APRT        | Adenine phosphoribosyltransferase                                                       | 19.537  | 20                     | 4               | 7           | 12.8                   | 2               | 4           |
| Q2KJA0           | ARAF        | ARAF protein                                                                            | 68.145  | #N/A                   | #N/A            | #N/A        | 3.1                    | 2               | 2           |
| P53619           | ARCN1       | Coatomer subunit delta                                                                  | 57.274  | 45.8                   | 26              | 64          | 29.5                   | 17              | 36          |
| P84081           | ARF2        | ADP-ribosylation factor 2                                                               | 20.746  | 58.6                   | 1               | 2           | #N/A                   | #N/A            | #N/A        |
| Q5E9I6           | ARF3        | ADP-ribosylation factor 3                                                               | 20.601  | 58.6                   | 1               | 54          | 35.9                   | 4               | 18          |
| Q3SZF2           | ARF4        | ADP-ribosylation factor 4                                                               | 20.527  | 64.4                   | 4               | 7           | 33.3                   | 3               | 12          |

| Accession number | Gene symbol | Discription                                                 | MW(kDa) | Biological Replicate 1 |                 |             | Biological Replicate 2 |                 |             |
|------------------|-------------|-------------------------------------------------------------|---------|------------------------|-----------------|-------------|------------------------|-----------------|-------------|
|                  |             |                                                             |         | Sequence coverage(%)   | Unique peptides | MS/MS count | Sequence coverage(%)   | Unique peptides | MS/MS count |
| A4IFP7           | ARF5        | ARF5 protein                                                | 20.529  | 56.1                   | 3               | 13          | 33.3                   | 2               | 53          |
| G3N3N1           | ARF6        | Uncharacterized protein                                     | 20.082  | 33.1                   | 4               | 5           | #N/A                   | #N/A            | #N/A        |
| A6QR32           | ARFGAP2     | ARFGAP2 protein                                             | 53.256  | 1.6                    | 1               | 1           | #N/A                   | #N/A            | #N/A        |
| Q08DK2           | ARFGAP3     | ADP-ribosylation factor GTPase activating protein 3         | 44.287  | 4.2                    | 2               | 3           | 4.2                    | 2               | 3           |
| O46382           | ARFGEF1     | Brefeldin A-inhibited guanine nucleotide-exchange protein 1 | 208.71  | #N/A                   | #N/A            | #N/A        | 1.4                    | 1               | 4           |
| E1BKI9           | ARFGEF2     | Uncharacterized protein                                     | 202.48  | 4.3                    | 7               | 7           | #N/A                   | #N/A            | #N/A        |
| F1MAV2           | ARFIP1      | Uncharacterized protein                                     | 41.729  | 41.8                   | 14              | 56          | 18                     | 7               | 21          |
| Q3ZCL5           | ARFIP2      | Arfaptin-2                                                  | 37.71   | 12.9                   | 5               | 8           | 8.5                    | 3               | 5           |
| Q32LJ2           | ARFRP1      | ADP-ribosylation factor-related                             | 22.644  | #N/A                   | #N/A            | #N/A        | 10.4                   | 2               | 4           |
| Q58DL1           | ARG2        | Arginase-2, mitochondrial                                   | 38.504  | 18.4                   | 5               | 8           | 15.8                   | 5               | 8           |
| F6RWK1           | ARHGAP1     | Uncharacterized protein                                     | 50.476  | 6.2                    | 3               | 4           | 4.8                    | 2               | 3           |
| Q08DP6           | ARHGAP10    | Rho GTPase-activating protein 10                            | 89.404  | 1.4                    | 1               | 1           | #N/A                   | #N/A            | #N/A        |
| A6QPU2           | ARHGAP12    | ARHGAP12 protein                                            | 89.818  | 6.4                    | 3               | 3           | 2.9                    | 2               | 3           |
| F1N458           | ARHGAP17    | Uncharacterized protein (Fragment)                          | 91.813  | 3.3                    | 3               | 4           | #N/A                   | #N/A            | #N/A        |
| E1BIH5           | ARHGAP18    | Uncharacterized protein                                     | 59.62   | 2.4                    | 1               | 1           | #N/A                   | #N/A            | #N/A        |
| F1MJ96           | ARHGEF37    | Uncharacterized protein                                     | 76.148  | 41.2                   | 24              | 47          | 11.3                   | 8               | 18          |
| F1MBM9           | ARHGEF7     | Uncharacterized protein                                     | 97.196  | 11                     | 8               | 10          | 8.8                    | 8               | 11          |
| A2VEA3           | ARIH1       | E3 ubiquitin-protein ligase ARIH1                           | 64.016  | 11.7                   | 6               | 9           | #N/A                   | #N/A            | #N/A        |
| Q2YDM1           | ARL1        | ADP-ribosylation factor-like                                | 20.427  | 55.2                   | 7               | 16          | 6.1                    | 1               | 3           |
| Q1RMP1           | ARL10       | ADP-ribosylation factor-like 10                             | 24.305  | 15.1                   | 2               | 5           | 5.5                    | 1               | 6           |
| Q2TA37           | ARL2        | ADP-ribosylation factor-like                                | 20.907  | 49.5                   | 9               | 20          | 28.8                   | 5               | 10          |
| G1K192           | ARL3        | ADP-ribosylation factor-like protein 3 (Fragment)           | 20.373  | 32                     | 5               | 8           | 10.5                   | 2               | 2           |
| Q0IIM2           | ARL6        | ADP-ribosylation factor-like                                | 21.055  | 8.6                    | 2               | 3           | #N/A                   | #N/A            | #N/A        |
| F1MBM4           | ARL6IP1     | Uncharacterized protein                                     | 16.74   | 16.7                   | 3               | 5           | 16.7                   | 3               | 19          |
| Q5E9M1           | ARL6IP5     | PRA1 family protein 3                                       | 21.666  | 5.9                    | 1               | 2           | 5.9                    | 1               | 1           |
| G3X6L5           | ARL8A       | Uncharacterized protein (Fragment)                          | 20.484  | 25.1                   | 1               | 4           | 15.6                   | 1               | 1           |
| Q2KI07           | ARL8B       | ADP-ribosylation factor-like                                | 21.511  | 49.5                   | 5               | 32          | 22.6                   | 2               | 21          |
| Q3ZBE1           | ARMC1       | Armadillo repeat-containing protein                         | 31.279  | 31.2                   | 11              | 21          | 13.8                   | 5               | 13          |

| Accession number | Gene symbol | Discription                                              | MW(kDa) | Biological Replicate 1 |                 |             | Biological Replicate 2 |                 |             |
|------------------|-------------|----------------------------------------------------------|---------|------------------------|-----------------|-------------|------------------------|-----------------|-------------|
|                  |             |                                                          |         | Sequence coverage(%)   | Unique peptides | MS/MS count | Sequence coverage(%)   | Unique peptides | MS/MS count |
| E1B717           | ARMC10      | Uncharacterized protein                                  | 33.644  | 44.6                   | 9               | 41          | 27                     | 6               | 15          |
| A6H718           | ARMC6       | ARMC6 protein                                            | 50.482  | 2.8                    | 1               | 3           | #N/A                   | #N/A            | #N/A        |
| Q2KI54           | ARMC8       | Armadillo repeat-containing protein                      | 75.45   | 4.5                    | 3               | 4           | #N/A                   | #N/A            | #N/A        |
| Q1JP79           | ARPC1A      | Actin-related protein 2/3 complex subunit 1A             | 41.539  | 50.3                   | 16              | 41          | 25.4                   | 10              | 26          |
| Q58CQ2           | ARPC1B      | Actin-related protein 2/3 complex subunit 1B             | 40.975  | 38.4                   | 15              | 34          | 18                     | 8               | 29          |
| Q3MHR7           | ARPC2       | Actin-related protein 2/3 complex subunit 2              | 34.349  | 69.7                   | 22              | 63          | 31.7                   | 10              | 43          |
| Q3T035           | ARPC3       | Actin-related protein 2/3 complex subunit 3              | 20.546  | 27.5                   | 5               | 24          | 15.7                   | 3               | 11          |
| Q148J6           | ARPC4       | Actin-related protein 2/3 complex subunit 4              | 19.667  | 42.9                   | 7               | 21          | 28                     | 5               | 24          |
| Q3SYX9           | ARPC5       | Actin-related protein 2/3 complex subunit 5              | 16.23   | 43                     | 6               | 15          | 48.3                   | 7               | 19          |
| Q5E963           | ARPC5L      | Actin-related protein 2/3 complex subunit 5-like protein | 16.941  | 46.4                   | 7               | 15          | 27.5                   | 5               | 8           |
| Q17QU3           | ARPIN       | Arpin                                                    | 24.886  | 11.9                   | 2               | 3           | #N/A                   | #N/A            | #N/A        |
| Q0P5B0           | ARRDC1      | Arrestin domain containing 1                             | 45.688  | 7.3                    | 3               | 3           | #N/A                   | #N/A            | #N/A        |
| Q08DD1           | ARSA        | Arylsulfatase A                                          | 53.806  | 11.8                   | 5               | 15          | 9.1                    | 5               | 9           |
| A6QLZ3           | ARSB        | ARSB protein                                             | 59.355  | 2.1                    | 1               | 1           | #N/A                   | #N/A            | #N/A        |
| Q58DQ0           | AS3MT       | Arsenic (+3 oxidation state) methyltransferase           | 41.742  | 35.6                   | 11              | 21          | 15.8                   | 6               | 19          |
| Q17QB3           | ASAH1       | Acid ceramidase                                          | 44.965  | 20.8                   | 8               | 23          | 8.6                    | 4               | 7           |
| E1BJU5           | ASAH2       | Uncharacterized protein                                  | 83.5    | 5.8                    | 4               | 6           | 2.6                    | 2               | 4           |
| E1BEH6           | ASB1        | Uncharacterized protein                                  | 36.626  | 3.3                    | 1               | 1           | #N/A                   | #N/A            | #N/A        |
| F1N2K6           | ASCC2       | Uncharacterized protein                                  | 53.183  | 1.7                    | 1               | 1           | #N/A                   | #N/A            | #N/A        |
| Q17QJ0           | ASF1B       | Histone chaperone ASF1B                                  | 22.421  | 28.2                   | 3               | 7           | 4                      | 1               | 4           |
| Q3SZJ0           | ASL         | Argininosuccinate lyase                                  | 52.742  | 17.1                   | 7               | 7           | #N/A                   | #N/A            | #N/A        |
| A5PJI5           | ASNA1       | ATPase ASNA1                                             | 38.792  | 17.5                   | 6               | 11          | 7.2                    | 3               | 4           |
| Q1LZA3           | ASNS        | Asparagine synthetase [glutamine-hydrolyzing]            | 64.219  | 46.3                   | 24              | 63          | 18.7                   | 11              | 27          |



| Accession number | Gene symbol | Discription                                                   | MW(kDa) | Biological Replicate 1 |                 |             | Biological Replicate 2 |                 |             |
|------------------|-------------|---------------------------------------------------------------|---------|------------------------|-----------------|-------------|------------------------|-----------------|-------------|
|                  |             |                                                               |         | Sequence coverage(%)   | Unique peptides | MS/MS count | Sequence coverage(%)   | Unique peptides | MS/MS count |
| P62285           | ASPM        | Abnormal spindle-like microcephaly-associated protein homolog | 395.09  | 0.2                    | 1               | 1           | 0.2                    | 1               | 2           |
| F1MTZ8           | ASPSR1      | Uncharacterized protein                                       | 61.346  | 12.4                   | 5               | 9           | 8.6                    | 4               | 11          |
| Q32LE5           | ASRGL1      | Isoaspartyl peptidase/L-                                      | 32.05   | 51.9                   | 12              | 36          | 22.7                   | 7               | 34          |
| F1MP41           | ASTL        | Uncharacterized protein (Fragment)                            | 39.959  | 65                     | 18              | 184         | 31.9                   | 11              | 99          |
| F6QV99           | ATAD1       | ATPase family AAA domain-containing protein 1                 | 40.774  | 14.7                   | 4               | 7           | 8                      | 3               | 7           |
| A7YWC4           | ATAD3       | ATPase family AAA domain-containing protein 3                 | 66.106  | 9.2                    | 6               | 8           | 13.7                   | 9               | 11          |
| E1BI60           | ATE1        | Arginyl-tRNA--protein transferase 1                           | 59.452  | 9.7                    | 5               | 7           | 1.5                    | 1               | 2           |
| F1MZE2           | ATG12       | Ubiquitin-like protein ATG12                                  | 13.924  | 20.3                   | 3               | 6           | #N/A                   | #N/A            | #N/A        |
| E1BGS8           | ATG16L1     | Uncharacterized protein                                       | 70.017  | 3.9                    | 3               | 4           | 2.4                    | 2               | 4           |
| Q0VCL3           | ATG3        | Ubiquitin-like-conjugating enzyme                             | 35.752  | 26.4                   | 8               | 19          | 10.5                   | 3               | 6           |
| Q3MQ24           | ATG5        | Autophagy protein 5                                           | 32.431  | 6.9                    | 2               | 4           | #N/A                   | #N/A            | #N/A        |
| G5E627           | ATG7        | Uncharacterized protein                                       | 77.496  | 8.7                    | 6               | 8           | 5.9                    | 4               | 5           |
| Q0VCK0           | ATIC        | Bifunctional purine biosynthesis protein PURH                 | 64.482  | 68.4                   | 36              | 106         | 30.4                   | 16              | 56          |
| Q58D72           | ATL1        | Atlastin-1                                                    | 63.534  | 5.7                    | 2               | 2           | #N/A                   | #N/A            | #N/A        |
| E1BE28           | ATL2        | Uncharacterized protein                                       | 66.347  | 11.3                   | 5               | 10          | 6.2                    | 4               | 7           |
| A5PJD6           | ATL3        | ATL3 protein                                                  | 60.311  | 26.2                   | 10              | 15          | 8.1                    | 5               | 8           |
| Q3TOE0           | ATOX1       | Copper transport protein ATOX1                                | 7.3654  | 11.8                   | 1               | 2           | 11.8                   | 1               | 3           |
| F1MSL3           | ATP10D      | Uncharacterized protein                                       | 159.94  | 2.6                    | 4               | 4           | 0.5                    | 1               | 1           |
| F1MW32           | ATP11B      | Uncharacterized protein (Fragment)                            | 134.27  | 3                      | 2               | 2           | 1.4                    | 2               | 2           |
| F1N3G6           | ATP11C      | Uncharacterized protein (Fragment)                            | 129.64  | 20.2                   | 19              | 38          | 11.6                   | 14              | 29          |
| F1MYA8           | ATP13A1     | Uncharacterized protein                                       | 132.59  | 4.3                    | 5               | 5           | 2.1                    | 3               | 3           |
| Q08DA1           | ATP1A1      | Sodium/potassium-transporting ATPase subunit alpha-1          | 112.64  | 25.8                   | 25              | 48          | 24.5                   | 22              | 64          |
| G3MWR4           | ATP1B1      | Uncharacterized protein                                       | 35.023  | 19.8                   | 4               | 9           | 14.2                   | 4               | 11          |
| Q3TOC6           | ATP1B3      | Sodium/potassium-transporting ATPase subunit beta-3           | 31.521  | 9                      | 3               | 5           | 13.3                   | 4               | 10          |
| Q0VCY0           | ATP2A1      | Sarcoplasmic/endoplasmic reticulum calcium ATPase 1           | 109.29  | #N/A                   | #N/A            | #N/A        | 4.9                    | 1               | 3           |

| Accession number | Gene symbol | Discription                                         | MW(kDa) | Biological Replicate 1 |                 |             | Biological Replicate 2 |                 |             |
|------------------|-------------|-----------------------------------------------------|---------|------------------------|-----------------|-------------|------------------------|-----------------|-------------|
|                  |             |                                                     |         | Sequence coverage(%)   | Unique peptides | MS/MS count | Sequence coverage(%)   | Unique peptides | MS/MS count |
| F1MPR3           | ATP2A2      | Uncharacterized protein                             | 111.93  | 17.5                   | 14              | 18          | 10                     | 7               | 18          |
| F1N7J2           | ATP2B1      | Uncharacterized protein                             | 134.78  | 6.9                    | 8               | 10          | 6.4                    | 4               | 11          |
| F1MS16           | ATP2B3      | Uncharacterized protein                             | 132.88  | #N/A                   | #N/A            | #N/A        | 3.3                    | 1               | 1           |
| P57709           | ATP2C1      | Calcium-transporting ATPase type 2C member 1        | 104.78  | 19.8                   | 15              | 24          | 14                     | 13              | 22          |
| P00829           | ATP5B       | ATP synthase subunit beta,                          | 56.283  | 71.6                   | 26              | 158         | 38.6                   | 16              | 99          |
| P05631           | ATP5C1      | ATP synthase subunit gamma,                         | 33.072  | 42.3                   | 13              | 31          | 36.2                   | 12              | 51          |
| P05630           | ATP5D       | ATP synthase subunit delta,                         | 17.612  | 13.7                   | 2               | 6           | 13.7                   | 2               | 4           |
| P13619           | ATP5F1      | ATP synthase F(0) complex subunit B1, mitochondrial | 28.821  | 26.2                   | 8               | 14          | 17.2                   | 6               | 17          |
| P32876           | ATP5G1      | ATP synthase F(0) complex subunit C1, mitochondrial | 14.222  | #N/A                   | #N/A            | #N/A        | 5.1                    | 1               | 8           |
| P13620           | ATP5H       | ATP synthase subunit d,                             | 18.692  | 38.5                   | 7               | 26          | 28.6                   | 6               | 11          |
| Q00361           | ATP5I       | ATP synthase subunit e,                             | 8.3206  | 42.3                   | 3               | 4           | 42.3                   | 3               | 10          |
| Q28851           | ATP5J2      | ATP synthase subunit f,                             | 10.297  | 27.3                   | 2               | 7           | #N/A                   | #N/A            | #N/A        |
| Q28852           | ATP5L       | ATP synthase subunit g,                             | 11.417  | 29.1                   | 3               | 6           | #N/A                   | #N/A            | #N/A        |
| P13621           | ATP5O       | ATP synthase subunit O,                             | 23.319  | 53.5                   | 11              | 44          | 16.9                   | 4               | 18          |
| P22027           | ATP5S       | ATP synthase subunit s,                             | 23.293  | 8.5                    | 2               | 2           | #N/A                   | #N/A            | #N/A        |
| P40682           | ATP6AP1     | V-type proton ATPase subunit S1                     | 51.781  | 3.2                    | 2               | 3           | #N/A                   | #N/A            | #N/A        |
| P81134           | ATP6AP2     | Renin receptor                                      | 39.491  | 6.8                    | 3               | 3           | 6.8                    | 3               | 5           |
| 097681           | ATP6V0A2    | V-type proton ATPase 116 kDa subunit a isoform 2    | 98.009  | 5.3                    | 4               | 5           | 1.3                    | 1               | 1           |
| E1BGJ7           | ATP6V0A4    | Uncharacterized protein                             | 95.748  | 3                      | 2               | 2           | #N/A                   | #N/A            | #N/A        |
| P61420           | ATP6V0D1    | V-type proton ATPase subunit d 1                    | 40.329  | 36.5                   | 11              | 23          | 19.7                   | 8               | 17          |
| Q2KJB6           | ATP6V0D2    | V-type proton ATPase subunit d 2                    | 40.497  | 4.3                    | 1               | 1           | #N/A                   | #N/A            | #N/A        |
| P31404           | ATP6V1A     | V-type proton ATPase catalytic                      | 68.343  | 47.3                   | 25              | 67          | 18.5                   | 10              | 23          |
| P31408           | ATP6V1B2    | V-type proton ATPase subunit B, brain isoform       | 56.576  | 49.3                   | 18              | 50          | 19.4                   | 9               | 23          |
| P21282           | ATP6V1C1    | V-type proton ATPase subunit C 1                    | 43.985  | 53.7                   | 21              | 46          | 30.4                   | 15              | 36          |
| F1N270           | ATP6V1D     | V-type proton ATPase subunit D                      | 28.248  | #N/A                   | #N/A            | #N/A        | 11.3                   | 3               | 3           |
| P11019           | ATP6V1E1    | V-type proton ATPase subunit E 1                    | 26.139  | 43.8                   | 12              | 18          | 21.2                   | 6               | 7           |

| Accession number | Gene symbol | Discription                                                    | MW(kDa) | Biological Replicate 1 |                 |             | Biological Replicate 2 |                 |             |
|------------------|-------------|----------------------------------------------------------------|---------|------------------------|-----------------|-------------|------------------------|-----------------|-------------|
|                  |             |                                                                |         | Sequence coverage(%)   | Unique peptides | MS/MS count | Sequence coverage(%)   | Unique peptides | MS/MS count |
| E1BN98           | ATP8A1      | Probable phospholipid-transporting ATPase IA                   | 130.34  | 8.6                    | 9               | 10          | 6.5                    | 7               | 8           |
| F1MG81           | ATPAF1      | Uncharacterized protein                                        | 36.009  | 18.6                   | 6               | 12          | #N/A                   | #N/A            | #N/A        |
| P01096           | ATPIF1      | ATPase inhibitor, mitochondrial                                | 12.301  | 15.6                   | 2               | 3           | 16.5                   | 4               | 11          |
| Q8MJ16           | ATRN        | Attractin                                                      | 157.45  | 1.1                    | 2               | 2           | #N/A                   | #N/A            | #N/A        |
| Q2TBW0           | ATXN10      | Ataxin-10                                                      | 53.102  | 19.8                   | 8               | 13          | 4.4                    | 2               | 3           |
| E1BJ59           | ATXN2L      | Uncharacterized protein                                        | 113.36  | 2.1                    | 3               | 3           | 2.6                    | 3               | 3           |
| F1MGJ7           | AUH         | Uncharacterized protein                                        | 31.284  | 6.6                    | 3               | 3           | #N/A                   | #N/A            | #N/A        |
| Q2TA06           | AURKA       | Aurora kinase A                                                | 45.462  | 57.2                   | 21              | 83          | 39.1                   | 14              | 54          |
| E1BMD5           | AVEN        | Uncharacterized protein                                        | 37.862  | #N/A                   | #N/A            | #N/A        | 3.1                    | 1               | 1           |
| F1MMN9           | AVIL        | Uncharacterized protein                                        | 91.569  | 18.9                   | 14              | 21          | 12.7                   | 10              | 28          |
| F1N025           | AVL9        | Uncharacterized protein (Fragment)                             | 68.367  | 7                      | 4               | 6           | 3.9                    | 2               | 2           |
| F1MKA0           | B3GALTL     | Uncharacterized protein (Fragment)                             | 46.685  | 20.4                   | 9               | 15          | 5.6                    | 3               | 6           |
| Q3SZB0           | B3GAT3      | Beta-1,3-glucuronyltransferase 3 (Glucuronosyltransferase I)   | 37.051  | 9                      | 3               | 6           | #N/A                   | #N/A            | #N/A        |
| Q5EA01           | B3GNT1      | N-acetyllactosaminide beta-1,3-N-acetylglucosaminyltransferase | 47.231  | 9.9                    | 4               | 5           | 9.4                    | 4               | 5           |
| A4IFK5           | B3GNT3      | B3GNT3 protein                                                 | 42.679  | 8.6                    | 3               | 8           | 9.1                    | 3               | 3           |
| F1MSS4           | B3GNT4      | Uncharacterized protein (Fragment)                             | 40.885  | 14.4                   | 6               | 11          | 3                      | 1               | 1           |
| Q32LF7           | B4GALT4     | UDP-Gal:betaGlcNAc beta 1,4-galactosyltransferase, polypeptide | 39.46   | 20.8                   | 6               | 13          | 11.1                   | 4               | 8           |
| Q08E57           | BABAM1      | BRISC and BRCA1-A complex member 1                             | 36.886  | 6                      | 2               | 3           | 3.3                    | 1               | 2           |
| Q3ZBG5           | BAG2        | BAG family molecular chaperone                                 | 23.649  | 6.6                    | 2               | 2           | 8.5                    | 2               | 3           |
| F1MY28           | BAG6        | Uncharacterized protein                                        | 118.75  | 13.8                   | 12              | 20          | 5.8                    | 6               | 10          |
| Q5EAD0           | BAIAP2      | Brain-specific angiogenesis inhibitor 1-associated protein 2   | 57.565  | 2.7                    | 1               | 2           | #N/A                   | #N/A            | #N/A        |
| F1MXR0           | BAIAP2L1    | Uncharacterized protein (Fragment)                             | 55.301  | 7.3                    | 4               | 4           | #N/A                   | #N/A            | #N/A        |
| F1MAV4           | BARD1       | Uncharacterized protein                                        | 85.728  | 1.2                    | 1               | 4           | 1.2                    | 1               | 2           |
| P80724           | BASP1       | Brain acid soluble protein 1                                   | 23.01   | #N/A                   | #N/A            | #N/A        | 32.2                   | 6               | 13          |
| O02703           | BAX         | Apoptosis regulator BAX                                        | 21.259  | 5.7                    | 1               | 1           | #N/A                   | #N/A            | #N/A        |
| Q32KL9           | BCAP29      | B-cell receptor-associated protein                             | 28.212  | 15.4                   | 4               | 5           | 8.3                    | 2               | 2           |
| Q5E9F1           | BCAP31      | B-cell receptor-associated protein                             | 27.901  | 44.9                   | 15              | 47          | 38.4                   | 16              | 68          |

| Accession number | Gene symbol | Discription                                                 | MW(kDa) | Biological Replicate 1 |                 |             | Biological Replicate 2 |                 |             |
|------------------|-------------|-------------------------------------------------------------|---------|------------------------|-----------------|-------------|------------------------|-----------------|-------------|
|                  |             |                                                             |         | Sequence coverage(%)   | Unique peptides | MS/MS count | Sequence coverage(%)   | Unique peptides | MS/MS count |
| F1N6R8           | BCAS3       | Uncharacterized protein                                     | 78.693  | 17.7                   | 11              | 18          | 5.9                    | 4               | 6           |
| A4IFQ7           | BCAT1       | Branched-chain-amino-acid                                   | 43.185  | 9.1                    | 4               | 7           | #N/A                   | #N/A            | #N/A        |
| Q5EA40           | BCAT2       | Branched-chain-amino-acid aminotransferase, mitochondrial   | 44.648  | 11.5                   | 4               | 8           | 7.4                    | 3               | 4           |
| Q2NL37           | BCCIP       | BRCA2 and CDKN1A-interacting                                | 35.183  | 2.6                    | 1               | 1           | #N/A                   | #N/A            | #N/A        |
| P11178           | BCKDHA      | 2-oxoisovalerate dehydrogenase subunit alpha, mitochondrial | 51.678  | 9.5                    | 4               | 4           | 4.6                    | 2               | 2           |
| P21839           | BCKDHB      | 2-oxoisovalerate dehydrogenase subunit beta, mitochondrial  | 42.935  | 13.8                   | 3               | 3           | #N/A                   | #N/A            | #N/A        |
| F1MNK0           | BCL2L13     | Uncharacterized protein                                     | 30.347  | 22.9                   | 6               | 7           | #N/A                   | #N/A            | #N/A        |
| Q5E9L4           | BCL2L14     | Apoptosis facilitator Bcl-2-like protein 14                 | 36.838  | #N/A                   | #N/A            | #N/A        | 4.3                    | 2               | 2           |
| Q0II48           | BCL2L15     | Bcl-2-like protein 15                                       | 17.717  | 34.6                   | 4               | 8           | 15.4                   | 2               | 3           |
| Q5E9H5           | BCS1L       | Mitochondrial chaperone BCS1                                | 47.504  | 37.7                   | 14              | 21          | 13.4                   | 5               | 11          |
| Q2TBV0           | BEX2        | Protein BEX2                                                | 15.236  | 7.8                    | 1               | 1           | #N/A                   | #N/A            | #N/A        |
| Q08DY1           | BIN3        | Bridging integrator 3                                       | 29.681  | 37.9                   | 10              | 14          | 6.7                    | 2               | 3           |
| E1BL29           | BLMH        | Uncharacterized protein                                     | 52.93   | 36.8                   | 16              | 38          | 19.4                   | 9               | 23          |
| A5D7K0           | BLVRA       | BLVRA protein                                               | 33.643  | 16.2                   | 4               | 11          | 7.4                    | 2               | 4           |
| P52556           | BLVRB       | Flavin reductase (NADPH)                                    | 22.132  | #N/A                   | #N/A            | #N/A        | 3.9                    | 1               | 2           |
| E1BEV7           | BMP1        | Uncharacterized protein                                     | 110.77  | #N/A                   | #N/A            | #N/A        | 6.1                    | 1               | 2           |
| Q6PX77           | BMP15       | Bone morphogenetic protein 15                               | 45.025  | 27.2                   | 10              | 30          | 18.3                   | 7               | 20          |
| F1MKS4           | BMP6        | Uncharacterized protein                                     | 54.372  | #N/A                   | #N/A            | #N/A        | 3                      | 1               | 2           |
| F1N353           | BNIP1       | Uncharacterized protein                                     | 26.141  | 8.3                    | 2               | 2           | 15.4                   | 4               | 8           |
| F1MYN0           | BOLA2B      | Uncharacterized protein (Fragment)                          | 10.344  | 47.2                   | 3               | 3           | #N/A                   | #N/A            | #N/A        |
| F1MJU5           | BOLADRB3    | Uncharacterized protein                                     | 30.554  | 9                      | 2               | 2           | 12.4                   | 3               | 4           |
| F1MX69           | BPGM        | Uncharacterized protein                                     | 30.07   | 58.3                   | 16              | 72          | 41.7                   | 11              | 58          |
| Q3ZCK3           | BPNT1       | 3(2),5-bisphosphate nucleotidase 1                          | 33.328  | 38.6                   | 10              | 28          | 19.8                   | 6               | 23          |
| A6H716           | BRAP        | BRAP protein                                                | 67.21   | 3.9                    | 2               | 2           | 1.5                    | 1               | 1           |
| G3X874           | BRCC3       | Lys-63-specific deubiquitinase                              | 33.265  | 4.5                    | 1               | 1           | #N/A                   | #N/A            | #N/A        |
| A6QQW8           | BRE         | BRCA1-A complex subunit BRE                                 | 43.56   | 6.3                    | 2               | 2           | #N/A                   | #N/A            | #N/A        |
| A5PJF5           | BRI3BP      | BRI3BP protein                                              | 26.937  | #N/A                   | #N/A            | #N/A        | 4.5                    | 1               | 2           |
| A6QLS8           | BRWD2       | BRWD2 protein                                               | 136.06  | 5.3                    | 5               | 8           | 2.7                    | 3               | 4           |

| Accession number | Gene symbol  | Discription                                                       | MW(kDa) | Biological Replicate 1 |                 |             | Biological Replicate 2 |                 |             |
|------------------|--------------|-------------------------------------------------------------------|---------|------------------------|-----------------|-------------|------------------------|-----------------|-------------|
|                  |              |                                                                   |         | Sequence coverage(%)   | Unique peptides | MS/MS count | Sequence coverage(%)   | Unique peptides | MS/MS count |
| Q5E9P6           | BSCL2        | Seipin                                                            | 44.016  | 8.4                    | 3               | 3           | 7.4                    | 3               | 3           |
| Q3SX22           | BSDC1        | BSD domain-containing protein 1                                   | 50.342  | #N/A                   | #N/A            | #N/A        | 5                      | 2               | 2           |
| Q3ZBX0           | BSG          | Basigin                                                           | 29.772  | 21.4                   | 4               | 8           | 11.4                   | 3               | 8           |
| F1MKU3           | BSPRY        | Uncharacterized protein (Fragment)                                | 49.698  | 14.7                   | 7               | 11          | 8.8                    | 4               | 8           |
| Q0VCV8           | BTBD10       | BTB (POZ) domain containing 10                                    | 54.432  | 4.8                    | 2               | 2           | #N/A                   | #N/A            | #N/A        |
| Q56JY8           | BTF3         | Btf3 protein                                                      | 17.713  | 35.2                   | 5               | 6           | #N/A                   | #N/A            | #N/A        |
| E1BMC2           | BTG4         | Uncharacterized protein                                           | 26.804  | #N/A                   | #N/A            | #N/A        | 8.3                    | 2               | 2           |
| F1MWP1           | BUB1B        | Uncharacterized protein                                           | 120.87  | 20.4                   | 17              | 23          | 0.8                    | 1               | 1           |
| Q1JQB2           | BUB3         | Mitotic checkpoint protein BUB3                                   | 36.954  | 32.5                   | 10              | 12          | 14.1                   | 5               | 7           |
| F1MZK4           | BZW1         | Uncharacterized protein                                           | 51.419  | 8.8                    | 3               | 5           | 8                      | 4               | 5           |
| Q3T018           | C10H140RF1   | Chromosome 14 open reading frame 1 ortholog                       | 15.759  | 16.4                   | 2               | 3           | 5.7                    | 1               | 1           |
| Q3T0S7           | C10H140RF166 | Chromosome 14 open reading frame 166 ortholog                     | 28.209  | 44.5                   | 10              | 17          | 23.7                   | 6               | 9           |
| A7YWQ2           | C10H15orf24  | Chromosome 15 open reading frame 24 ortholog                      | 26.502  | 16.2                   | 3               | 4           | #N/A                   | #N/A            | #N/A        |
| F1MSE5           | C10orf76     | Uncharacterized protein                                           | 67.504  | #N/A                   | #N/A            | #N/A        | 1.5                    | 1               | 2           |
| A1A4K7           | C13H200RF108 | Chromosome 20 open reading frame 108 ortholog                     | 20.447  | #N/A                   | #N/A            | #N/A        | 5.2                    | 1               | 2           |
| Q2HJH8           | C15H11orf70  | Uncharacterized protein C11orf70                                  | 30.691  | 29.6                   | 6               | 6           | #N/A                   | #N/A            | #N/A        |
| G3MX25           | C15orf61     | Uncharacterized protein (Fragment)                                | 18.062  | 22.2                   | 3               | 4           | #N/A                   | #N/A            | #N/A        |
| F1MPA1           | C16orf62     | Uncharacterized protein                                           | 109.47  | 10.3                   | 9               | 12          | 10                     | 10              | 13          |
| F1MQB5           | C16orf70     | Uncharacterized protein                                           | 47.592  | 6.9                    | 2               | 3           | 4.3                    | 2               | 2           |
| E1BCP5           | C17orf75     | Uncharacterized protein                                           | 44.314  | 4                      | 1               | 1           | #N/A                   | #N/A            | #N/A        |
| Q3SZM3           | C19H17orf62  | Uncharacterized protein C17orf62                                  | 20.905  | 20.3                   | 5               | 7           | #N/A                   | #N/A            | #N/A        |
| E1B9I1           | C19orf70     | Uncharacterized protein                                           | 13.317  | 89.8                   | 9               | 17          | 19.5                   | 3               | 8           |
| Q0VC84           | C1GALT1      | Glycoprotein-N-acetylgalactosamine 3-beta-galactosyltransferase 1 | 43.04   | 3.5                    | 1               | 2           | #N/A                   | #N/A            | #N/A        |
| Q3SX46           | C1GALT1C1    | C1GALT1-specific chaperone 1                                      | 36.441  | #N/A                   | #N/A            | #N/A        | 5                      | 2               | 3           |
| F1N582           | C1orf27      | Uncharacterized protein                                           | 50.98   | 11.7                   | 4               | 5           | 4.6                    | 2               | 4           |
| Q3T0B6           | C1QBP        | Complement component 1 Q subcomponent-binding protein,            | 30.606  | 30.6                   | 5               | 33          | 15.8                   | 3               | 5           |

| Accession number | Gene symbol | Discription                                            | MW(kDa) | Biological Replicate 1 |                 |             | Biological Replicate 2 |                 |             |
|------------------|-------------|--------------------------------------------------------|---------|------------------------|-----------------|-------------|------------------------|-----------------|-------------|
|                  |             |                                                        |         | Sequence coverage(%)   | Unique peptides | MS/MS count | Sequence coverage(%)   | Unique peptides | MS/MS count |
| Q0VCX1           | C1S         | Complement C1s subcomponent                            | 76.608  | 2.3                    | 1               | 1           | #N/A                   | #N/A            | #N/A        |
| Q3ZBP8           | C21H15orf40 | UPF0235 protein C15orf40 homolog                       | 13.417  | 10.3                   | 1               | 1           | #N/A                   | #N/A            | #N/A        |
| Q32KX8           | C25H16orf13 | UPF0585 protein C16orf13 homolog                       | 22.714  | 26                     | 5               | 10          | 19.1                   | 4               | 5           |
| A6H794           | C28H100RF35 | C28H100RF35 protein                                    | 13.144  | 20.8                   | 2               | 2           | #N/A                   | #N/A            | #N/A        |
| A4IFA8           | C29H11orf68 | UPF0696 protein C11orf68 homolog                       | 27.398  | 8                      | 2               | 2           | 7.2                    | 2               | 3           |
| A5PK60           | C2H2orf33   | C2H2orf33 protein                                      | 29.7    | #N/A                   | #N/A            | #N/A        | 7.6                    | 3               | 5           |
| A3KN05           | C2H2orf47   | Uncharacterized protein C2orf47 homolog, mitochondrial | 32.94   | 3.4                    | 1               | 2           | 8.6                    | 3               | 4           |
| Q32KX9           | C2H2orf76   | UPF0538 protein C2orf76 homolog                        | 14.666  | 20.6                   | 2               | 2           | #N/A                   | #N/A            | #N/A        |
| E1BDF4           | C2orf44     | Uncharacterized protein                                | 74.293  | 2.7                    | 2               | 2           | #N/A                   | #N/A            | #N/A        |
| Q17Q88           | C3H10RF41   | Chromosome 1 open reading frame 41 ortholog            | 16.399  | 11.9                   | 1               | 1           | #N/A                   | #N/A            | #N/A        |
| F1MZT6           | C3H1orf50   | Uncharacterized protein                                | 22.098  | 15.9                   | 2               | 5           | #N/A                   | #N/A            | #N/A        |
| Q0P5L7           | C3H1orf85   | Lysosomal protein NCU-G1                               | 43.53   | 8.7                    | 2               | 3           | #N/A                   | #N/A            | #N/A        |
| E1B722           | C3orf33     | Uncharacterized protein                                | 34.127  | 14.6                   | 4               | 5           | 9.5                    | 3               | 5           |
| Q1LZE8           | C4H7orf25   | UPF0415 protein C7orf25 homolog                        | 46.427  | 2.1                    | 1               | 1           | #N/A                   | #N/A            | #N/A        |
| E1BMH3           | C4orf33     | Uncharacterized protein                                | 23.181  | 29.1                   | 5               | 7           | #N/A                   | #N/A            | #N/A        |
| Q29RU4           | C6          | Complement component C6                                | 104.54  | 1                      | 1               | 1           | 1.9                    | 2               | 3           |
| P62248           | C7H19orf10  | UPF0556 protein C19orf10 homolog                       | 19.03   | 30.5                   | 5               | 21          | 15.5                   | 3               | 5           |
| G3N3L6           | C7H19orf52  | Uncharacterized protein                                | 28.909  | 12.7                   | 4               | 4           | #N/A                   | #N/A            | #N/A        |
| Q32L09           | C7H19orf66  | UPF0515 protein C19orf66 homolog                       | 33.205  | 12.4                   | 3               | 4           | 16.6                   | 5               | 9           |
| A8YXZ2           | C8G         | C8G protein                                            | 25.288  | #N/A                   | #N/A            | #N/A        | 3.8                    | 1               | 2           |
| A2VDY4           | C8H4orf27   | UPF0609 protein C4orf27 homolog                        | 39.09   | 7.8                    | 3               | 7           | #N/A                   | #N/A            | #N/A        |
| Q1JP73           | C8H9orf64   | UPF0553 protein C9orf64 homolog                        | 39.036  | 44.6                   | 15              | 32          | 15.5                   | 6               | 11          |
| F1N1V6           | C9H6orf120  | Uncharacterized protein                                | 20.202  | 34.2                   | 2               | 3           | #N/A                   | #N/A            | #N/A        |
| E1BJC0           | C9orf41     | Uncharacterized protein                                | 47.532  | 2.9                    | 1               | 2           | #N/A                   | #N/A            | #N/A        |
| F1NOH3           | CA2         | Carbonic anhydrase 2 (Fragment)                        | 27.75   | 11.2                   | 3               | 8           | #N/A                   | #N/A            | #N/A        |
| E1BAD9           | CA5A        | Uncharacterized protein                                | 34.906  | 4.8                    | 1               | 2           | #N/A                   | #N/A            | #N/A        |
| Q29RI6           | CAB39       | Calcium-binding protein 39                             | 39.869  | 43.1                   | 13              | 22          | 11.7                   | 4               | 10          |
| F1MMV6           | CAB39L      | Uncharacterized protein (Fragment)                     | 39.05   | 9.5                    | 2               | 4           | #N/A                   | #N/A            | #N/A        |
| Q3T168           | CACYBP      | Calcyclin-binding protein                              | 26.332  | 45.2                   | 9               | 12          | 13.9                   | 4               | 7           |
| F1MKZ3           | CADPS       | Uncharacterized protein (Fragment)                     | 137.65  | 4.4                    | 2               | 3           | #N/A                   | #N/A            | #N/A        |

| Accession number | Gene symbol | Discription                                                 | MW(kDa) | Biological Replicate 1 |                 |             | Biological Replicate 2 |                 |             |
|------------------|-------------|-------------------------------------------------------------|---------|------------------------|-----------------|-------------|------------------------|-----------------|-------------|
|                  |             |                                                             |         | Sequence coverage(%)   | Unique peptides | MS/MS count | Sequence coverage(%)   | Unique peptides | MS/MS count |
| A7MB25           | CADPS2      | CADPS2 protein                                              | 143.62  | 9                      | 6               | 15          | 2.7                    | 4               | 7           |
| F1MJW8           | CALB2       | Calretinin                                                  | 31.35   | 46.1                   | 12              | 29          | 26.2                   | 7               | 11          |
| Q2KJ21           | CALCOCO1    | Calcium-binding and coiled-coil domain-containing protein 1 | 75.66   | #N/A                   | #N/A            | #N/A        | 1.5                    | 1               | 1           |
| P62157           | CALM        | Calmodulin                                                  | 16.837  | 50.3                   | 5               | 11          | 26.8                   | 4               | 8           |
| P52193           | CALR        | Calreticulin                                                | 48.038  | 51.3                   | 26              | 196         | 32.4                   | 16              | 109         |
| Q08DQ1           | CAMK1       | Calcium/calmodulin-dependent protein kinase I               | 41.398  | 10.8                   | 4               | 8           | 4.3                    | 1               | 2           |
| F1MG86           | CAMK2B      | Uncharacterized protein (Fragment)                          | 53.592  | 21.1                   | 5               | 7           | 13.1                   | 4               | 17          |
| A5D9F0           | CAMK2D      | Calcium/calmodulin-dependent protein kinase II delta        | 54.113  | 20.7                   | 5               | 12          | 10.7                   | 3               | 6           |
| E1BPZ9           | CAMSAP3     | Uncharacterized protein                                     | 134.88  | #N/A                   | #N/A            | #N/A        | 0.7                    | 1               | 1           |
| A7MBJ5           | CAND1       | Cullin-associated NEDD8-dissociated protein 1               | 136.37  | 56.9                   | 60              | 272         | 33.3                   | 37              | 199         |
| E1BNE2           | CAND2       | Uncharacterized protein                                     | 134.57  | 24.3                   | 19              | 34          | 8.2                    | 6               | 14          |
| E1BGL5           | CANT1       | Uncharacterized protein                                     | 44.705  | 8                      | 2               | 3           | 9                      | 4               | 7           |
| A7Z066           | canx        | Canx protein                                                | 67.775  | 39                     | 30              | 105         | 21.1                   | 14              | 49          |
| Q27970           | CAPN1       | Calpain-1 catalytic subunit                                 | 82.206  | 21.8                   | 14              | 24          | 8                      | 5               | 9           |
| E1BIX3           | CAPN7       | Uncharacterized protein                                     | 92.556  | 5                      | 3               | 6           | 1.4                    | 1               | 3           |
| P13135           | CAPNS1      | Calpain small subunit 1                                     | 27.931  | 9.1                    | 3               | 7           | 9.1                    | 3               | 6           |
| F1MCP8           | CAPRN2      | Uncharacterized protein (Fragment)                          | 121.48  | 11                     | 11              | 14          | 9                      | 10              | 22          |
| A4FUA8           | CAPZA1      | F-actin-capping protein subunit                             | 32.931  | 70.6                   | 10              | 35          | 22.7                   | 4               | 13          |
| Q5E997           | CAPZA2      | F-actin-capping protein subunit                             | 32.979  | 51.4                   | 7               | 15          | 17.1                   | 3               | 3           |
| F1MW90           | CARD10      | Uncharacterized protein                                     | 115.62  | 1.1                    | 1               | 1           | #N/A                   | #N/A            | #N/A        |
| Q2NKU4           | CARHSP1     | Calcium regulated heat stable protein 1, 24kDa              | 15.891  | 38.8                   | 6               | 18          | 12.9                   | 2               | 3           |
| E1BNQ4           | CARKD       | ATP-dependent (S)-NAD(P)H-hydrate dehydratase               | 34.809  | 41.6                   | 12              | 39          | 28.6                   | 9               | 27          |
| F1MBG0           | CARM1       | Uncharacterized protein (Fragment)                          | 58.762  | 8.2                    | 4               | 4           | #N/A                   | #N/A            | #N/A        |
| A4FUC8           | CARS        | CARS protein                                                | 94.132  | 16.3                   | 13              | 17          | 11.3                   | 9               | 18          |
| Q2KIF8           | CARS2       | Cysteine--tRNA ligase,                                      | 61.198  | 40.4                   | 20              | 52          | 30.8                   | 14              | 41          |
| A5D7H5           | CASC3       | Protein CASC3                                               | 76.146  | 1.3                    | 1               | 2           | 1.6                    | 1               | 1           |

| Accession number | Gene symbol | Discription                        | MW(kDa) | Biological Replicate 1 |                 |             | Biological Replicate 2 |                 |             |
|------------------|-------------|------------------------------------|---------|------------------------|-----------------|-------------|------------------------|-----------------|-------------|
|                  |             |                                    |         | Sequence coverage(%)   | Unique peptides | MS/MS count | Sequence coverage(%)   | Unique peptides | MS/MS count |
| Q08DY9           | CASP3       | Caspase-3                          | 31.135  | 6.9                    | 2               | 2           | 4                      | 1               | 2           |
| Q3TOP5           | CASP6       | Caspase-6                          | 33.35   | 16                     | 5               | 12          | #N/A                   | #N/A            | #N/A        |
| P00432           | CAT         | Catalase                           | 59.915  | 12.5                   | 5               | 6           | 10.6                   | 6               | 8           |
| P79132           | CAV1        | Caveolin-1                         | 20.594  | #N/A                   | #N/A            | #N/A        | 5.6                    | 1               | 1           |
| E1BJS3           | CBL         | Uncharacterized protein (Fragment) | 99.598  | 13.1                   | 9               | 12          | 1.9                    | 2               | 2           |
| Q3SZD7           | CBR1        | Carbonyl reductase [NADPH] 1       | 30.533  | 45.8                   | 7               | 19          | 7.9                    | 1               | 2           |
| Q0VC97           | CBR3        | Carbonyl reductase 3               | 30.762  | 14.1                   | 2               | 5           | 16.6                   | 3               | 12          |
| F1MEW4           | CBS         | Uncharacterized protein            | 62.867  | 18.2                   | 11              | 17          | 8.9                    | 5               | 11          |
| E1BFK3           | CBWD2       | Uncharacterized protein            | 44.636  | 30.2                   | 10              | 13          | 6.3                    | 3               | 4           |
| G5E6N7           | CBX1        | Uncharacterized protein            | 21.418  | 13                     | 2               | 2           | #N/A                   | #N/A            | #N/A        |
| A5PKI6           | CC2D1A      | CC2D1A protein                     | 103.93  | 10.8                   | 8               | 10          | 3.7                    | 3               | 4           |
| F1N7R5           | CC2D1B      | Uncharacterized protein            | 93.4    | 3.3                    | 3               | 4           | #N/A                   | #N/A            | #N/A        |
| E1BJ81           | CCAR1       | Uncharacterized protein (Fragment) | 58.242  | 1.7                    | 1               | 1           | #N/A                   | #N/A            | #N/A        |
| E1B9H3           | CCAR2       | Uncharacterized protein            | 101.93  | 5.5                    | 4               | 6           | 3.9                    | 4               | 6           |
| F1MW71           | CCBL1       | Uncharacterized protein (Fragment) | 40.348  | 4.8                    | 1               | 2           | 4.8                    | 1               | 2           |
| Q0P5G4           | CCBL2       | Kynurenine--oxoglutarate           | 51.471  | 24.8                   | 8               | 15          | 11.4                   | 4               | 8           |
| Q3ZBZ7           | CCDC109B    | Coiled-coil domain containing 109B | 39.024  | 12.5                   | 4               | 4           | #N/A                   | #N/A            | #N/A        |
| Q2TBV6           | CCDC124     | Coiled-coil domain-containing      | 26.005  | 7.6                    | 2               | 3           | 12.1                   | 3               | 6           |
| F1ML08           | CCDC132     | Uncharacterized protein            | 111.15  | 11                     | 9               | 13          | 2.2                    | 2               | 4           |
| E1BFW1           | CCDC134     | Uncharacterized protein            | 26.375  | 25.3                   | 4               | 5           | 19.2                   | 3               | 8           |
| G3MWY8           | CCDC167     | Uncharacterized protein            | 9.7784  | #N/A                   | #N/A            | #N/A        | 9.5                    | 1               | 2           |
| Q1RMI8           | CCDC22      | Coiled-coil domain-containing      | 67.041  | 34.3                   | 16              | 40          | 13.1                   | 7               | 16          |
| Q3SZX8           | CCDC25      | Coiled-coil domain-containing      | 24.618  | 3.8                    | 1               | 1           | #N/A                   | #N/A            | #N/A        |
| Q05B58           | CCDC53      | WASH complex subunit CCDC53        | 21.345  | 20.6                   | 4               | 7           | 11.3                   | 3               | 5           |
| A4FUI1           | CCDC58      | Coiled-coil domain-containing      | 16.708  | #N/A                   | #N/A            | #N/A        | 18.1                   | 2               | 2           |
| F1N091           | CCDC6       | Uncharacterized protein (Fragment) | 43.105  | 36.7                   | 11              | 23          | 12.1                   | 5               | 12          |
| F1MAY4           | CCDC88A     | Uncharacterized protein            | 216.58  | #N/A                   | #N/A            | #N/A        | 3.9                    | 9               | 11          |
| E1B6Y1           | CCDC90A     | Uncharacterized protein            | 38.687  | 12.7                   | 7               | 9           | 12.7                   | 6               | 11          |
| A6QPA1           | CCDC90B     | CCDC90B protein                    | 28.675  | 29.8                   | 7               | 13          | 15.3                   | 5               | 14          |
| F1MDJ4           | CCDC93      | Uncharacterized protein            | 73.061  | 13.9                   | 8               | 10          | 7.6                    | 6               | 10          |
| Q1LZG6           | CCNB1       | G2/mitotic-specific cyclin-B1      | 47.657  | 3.7                    | 2               | 2           | #N/A                   | #N/A            | #N/A        |
| E1BC90           | CCNI2       | Uncharacterized protein            | 40.46   | 55.1                   | 17              | 65          | 29.6                   | 9               | 24          |



| Accession number | Gene symbol | Discription                                                                            | MW(kDa) | Biological Replicate 1 |                 |             | Biological Replicate 2 |                 |             |
|------------------|-------------|----------------------------------------------------------------------------------------|---------|------------------------|-----------------|-------------|------------------------|-----------------|-------------|
|                  |             |                                                                                        |         | Sequence coverage(%)   | Unique peptides | MS/MS count | Sequence coverage(%)   | Unique peptides | MS/MS count |
| E1BBI6           | CCNYL1      | Uncharacterized protein                                                                | 41.127  | 6.9                    | 2               | 2           | 4.7                    | 2               | 4           |
| A2VE74           | CCRN4L      | CCR4 carbon catabolite repression 4-like (S. cerevisiae)                               | 47.923  | 7.5                    | 2               | 2           | 1.9                    | 1               | 2           |
| E1BE86           | CCS         | Uncharacterized protein                                                                | 29.185  | 9.1                    | 3               | 4           | 5.5                    | 2               | 3           |
| Q3ZBH0           | CCT2        | T-complex protein 1 subunit beta                                                       | 57.475  | 72                     | 35              | 125         | 40.7                   | 21              | 62          |
| Q3TOK2           | CCT3        | T-complex protein 1 subunit gamma                                                      | 60.585  | 67                     | 41              | 117         | 38.5                   | 26              | 89          |
| F1MWD3           | CCT5        | Uncharacterized protein                                                                | 59.614  | 67.7                   | 36              | 145         | 33.8                   | 23              | 85          |
| Q3MHL7           | CCT6A       | T-complex protein 1 subunit zeta                                                       | 57.956  | 49.7                   | 25              | 82          | 37.9                   | 21              | 92          |
| F1MWR8           | CCT7        | T-complex protein 1 subunit eta                                                        | 59.18   | 54.2                   | 27              | 92          | 43.8                   | 21              | 98          |
| Q3ZCI9           | CCT8        | T-complex protein 1 subunit theta                                                      | 59.609  | 77.9                   | 39              | 112         | 55.3                   | 28              | 120         |
| Q0VD30           | CCZ1        | Vacuolar fusion protein CCZ1                                                           | 55.501  | 10.4                   | 5               | 6           | #N/A                   | #N/A            | #N/A        |
| Q3ZBH3           | CD151       | CD151 antigen                                                                          | 27.986  | 4                      | 1               | 1           | #N/A                   | #N/A            | #N/A        |
| Q3ZC60           | CD200       | CD200 molecule                                                                         | 30.093  | 3.7                    | 1               | 2           | 3.7                    | 1               | 2           |
| F1N2H6           | CD276       | Uncharacterized protein (Fragment)                                                     | 56.477  | #N/A                   | #N/A            | #N/A        | 3.8                    | 1               | 1           |
| F1MM14           | CD2AP       | Uncharacterized protein                                                                | 71.203  | 2.2                    | 1               | 1           | #N/A                   | #N/A            | #N/A        |
| A6QNY1           | CD320       | CD320 antigen                                                                          | 26.934  | 5.9                    | 3               | 6           | 3.1                    | 2               | 3           |
| Q28203           | CD40        | Tumor necrosis factor receptor superfamily member 5                                    | 31.061  | 3.2                    | 1               | 1           | #N/A                   | #N/A            | #N/A        |
| F1N4W5           | CD46        | Membrane cofactor protein                                                              | 39.943  | 3.5                    | 1               | 2           | 3.5                    | 1               | 3           |
| Q45VK8           | CD55        | DAF-2                                                                                  | 40.466  | 3.8                    | 3               | 5           | 3.5                    | 1               | 4           |
| Q9XSK2           | CD63        | CD63 antigen                                                                           | 25.752  | 8.9                    | 3               | 3           | #N/A                   | #N/A            | #N/A        |
| G3MYH4           | CD81        | CD81 antigen (Fragment)                                                                | 23.226  | 9.3                    | 1               | 5           | 9.3                    | 1               | 3           |
| G8JKX6           | CD9         | CD9 antigen (Fragment)                                                                 | 22.665  | 3.9                    | 1               | 3           | 3.9                    | 1               | 3           |
| Q8SQA4           | CD97        | CD97 antigen                                                                           | 80.321  | #N/A                   | #N/A            | #N/A        | 2.9                    | 2               | 5           |
| Q2YDG3           | CDC123      | Cell division cycle protein 123                                                        | 38.922  | 8.4                    | 3               | 3           | 4.2                    | 2               | 2           |
| Q5EAC6           | CDC37       | Hsp90 co-chaperone Cdc37                                                               | 44.58   | 38.7                   | 17              | 48          | 23.9                   | 9               | 34          |
| Q2KJ93           | CDC42       | Cell division control protein 42                                                       | 21.258  | 48.2                   | 7               | 15          | 31.4                   | 4               | 18          |
| F1N619           | CDH1        | Cadherin-1 (Fragment)                                                                  | 91.858  | 2.7                    | 2               | 3           | 2.1                    | 2               | 2           |
| E1BGT1           | CDH3        | Cadherin-3                                                                             | 90.99   | 8.2                    | 4               | 5           | 3                      | 2               | 3           |
| Q3T103           | CDIPT       | CDP-diacylglycerol--inositol 3-phosphatidyltransferase (Phosphatidylinositol synthase) | 23.597  | 13.1                   | 3               | 4           | 8                      | 2               | 5           |

| Accession number | Gene symbol | Discription                                                      | MW(kDa) | Biological Replicate 1 |                 |             | Biological Replicate 2 |                 |             |
|------------------|-------------|------------------------------------------------------------------|---------|------------------------|-----------------|-------------|------------------------|-----------------|-------------|
|                  |             |                                                                  |         | Sequence coverage(%)   | Unique peptides | MS/MS count | Sequence coverage(%)   | Unique peptides | MS/MS count |
| P48734           | CDK1        | Cyclin-dependent kinase 1                                        | 34.025  | 67.3                   | 16              | 71          | 34                     | 9               | 24          |
| Q02399           | CDK5        | Cyclin-dependent kinase 5                                        | 33.288  | 71.9                   | 19              | 77          | 38.7                   | 12              | 50          |
| F1MM23           | CDK5RAP3    | Uncharacterized protein                                          | 56.915  | 7.5                    | 5               | 6           | 3.4                    | 2               | 4           |
| Q08DX5           | CDK7        | Cyclin-dependent kinase 7                                        | 38.946  | 5.5                    | 1               | 2           | 4.9                    | 2               | 3           |
| F1MAW5           | CDKAL1      | Uncharacterized protein                                          | 65.481  | 6.4                    | 3               | 3           | #N/A                   | #N/A            | #N/A        |
| Q3SZU4           | CD01        | Cysteine dioxygenase type 1                                      | 23.013  | 29                     | 6               | 15          | 11.5                   | 3               | 6           |
| G3MZU2           | CDS1        | Phosphatidate cytidyltransferase                                 | 53.128  | #N/A                   | #N/A            | #N/A        | 3.7                    | 3               | 5           |
| A0JNC1           | CDS2        | Phosphatidate cytidyltransferase                                 | 51.356  | #N/A                   | #N/A            | #N/A        | 1.8                    | 1               | 3           |
| F1MGI9           | CECR5       | Uncharacterized protein                                          | 42.565  | 8.7                    | 2               | 6           | 7.7                    | 3               | 5           |
| Q2TBH1           | CENPM       | Centromere protein M                                             | 19.635  | 6.7                    | 1               | 1           | #N/A                   | #N/A            | #N/A        |
| Q3ZBK8           | CENPO       | Centromere protein 0                                             | 33.892  | 7.4                    | 1               | 1           | #N/A                   | #N/A            | #N/A        |
| G3N1U1           | CENPV       | Uncharacterized protein                                          | 28.839  | 4.2                    | 1               | 1           | #N/A                   | #N/A            | #N/A        |
| Q2HJG1           | CEP27       | Centrosomal protein 27kDa                                        | 26.688  | #N/A                   | #N/A            | #N/A        | 8.1                    | 2               | 5           |
| E1B8M0           | CEP55       | Uncharacterized protein                                          | 54.333  | 2.8                    | 1               | 1           | #N/A                   | #N/A            | #N/A        |
| F1N1V2           | CEPT1       | Uncharacterized protein                                          | 46.45   | 2.6                    | 1               | 1           | #N/A                   | #N/A            | #N/A        |
| Q3ZBF8           | CERS2       | Ceramide synthase 2                                              | 44.903  | 6.6                    | 2               | 3           | 2.4                    | 1               | 1           |
| Q5E9R6           | CERS4       | Ceramide synthase 4                                              | 46.363  | 12.5                   | 4               | 10          | 2.8                    | 1               | 1           |
| Q2TBN3           | CETN2       | Centrin-2                                                        | 19.809  | 17.4                   | 2               | 3           | #N/A                   | #N/A            | #N/A        |
| F1N547           | CETN3       | Uncharacterized protein                                          | 19.563  | 7.2                    | 1               | 1           | 13.2                   | 3               | 3           |
| Q6B857           | CFAP20      | UPF0468 protein C16orf80 homolog                                 | 22.748  | 29                     | 5               | 10          | 15                     | 3               | 6           |
| Q5E9F7           | CFL1        | Cofilin-1                                                        | 18.518  | 72.3                   | 10              | 43          | 36.1                   | 5               | 21          |
| Q148F1           | CFL2        | Cofilin-2                                                        | 18.736  | 66.9                   | 8               | 23          | 61.4                   | 7               | 22          |
| F1MYN2           | CGN         | Uncharacterized protein                                          | 136.09  | 7                      | 9               | 12          | 2.8                    | 4               | 6           |
| A6QLA6           | CHAF1A      | Chromatin assembly factor 1 subunit                              | 107.26  | #N/A                   | #N/A            | #N/A        | 2                      | 2               | 2           |
| A5D9H4           | CHAF1B      | Chromatin assembly factor 1 subunit                              | 62.768  | 1.9                    | 1               | 1           | 1.9                    | 1               | 1           |
| Q5E9D3           | CHCHD3      | Coiled-coil-helix-coiled-coil-helix domain-containing protein 3, | 26.1    | 34.4                   | 10              | 26          | 31.3                   | 10              | 30          |
| Q32L35           | CHCHD6      | Coiled-coil-helix-coiled-coil-helix domain-containing protein 6, | 26.439  | 22.5                   | 6               | 12          | 24.2                   | 6               | 12          |
| E1BES2           | CHDH        | Choline dehydrogenase                                            | 65.517  | 8.1                    | 5               | 6           | 4.4                    | 3               | 11          |
| A5D7V1           | CHEK1       | CHEK1 protein                                                    | 54.47   | 2.3                    | 1               | 1           | #N/A                   | #N/A            | #N/A        |
| Q5EAB4           | CHID1       | Chitinase domain-containing protein                              | 44.562  | 21.1                   | 8               | 19          | 11.5                   | 5               | 12          |

| Accession number | Gene symbol | Discription                                                   | MW(kDa) | Biological Replicate 1 |                 |             | Biological Replicate 2 |                 |             |
|------------------|-------------|---------------------------------------------------------------|---------|------------------------|-----------------|-------------|------------------------|-----------------|-------------|
|                  |             |                                                               |         | Sequence coverage(%)   | Unique peptides | MS/MS count | Sequence coverage(%)   | Unique peptides | MS/MS count |
| G3X782           | CHKB        | Uncharacterized protein                                       | 45.186  | 40.5                   | 13              | 29          | 12.7                   | 4               | 8           |
| F1MW33           | CHL1        | Uncharacterized protein (Fragment)                            | 133.59  | 3.7                    | 3               | 3           | 3.8                    | 5               | 7           |
| F1MS24           | CHM         | Uncharacterized protein (Fragment)                            | 69.173  | 2.9                    | 2               | 4           | #N/A                   | #N/A            | #N/A        |
| Q32KR9           | CHMP1A      | Chromatin modifying protein 1A                                | 21.712  | 20.9                   | 6               | 8           | 24.5                   | 7               | 14          |
| Q5E994           | CHMP1B      | Charged multivesicular body protein                           | 22.022  | 12.1                   | 3               | 4           | 4.5                    | 1               | 2           |
| Q3TOU5           | CHMP2A      | Chromatin modifying protein 2A                                | 25.132  | 24.3                   | 8               | 16          | 7.7                    | 3               | 9           |
| Q3SX42           | CHMP2B      | Charged multivesicular body protein                           | 23.95   | 19.7                   | 5               | 12          | 16.4                   | 4               | 6           |
| Q58CS7           | CHMP3       | Charged multivesicular body protein                           | 25.017  | 12.2                   | 3               | 7           | 17.1                   | 5               | 11          |
| Q08E32           | CHMP4B      | CHMP4B protein                                                | 24.936  | #N/A                   | #N/A            | #N/A        | 13.8                   | 3               | 8           |
| F1MZV2           | CHMP5       | Uncharacterized protein                                       | 24.589  | 10.5                   | 2               | 4           | 14.6                   | 2               | 3           |
| Q148L0           | CHMP6       | Chromatin modifying protein 6                                 | 23.507  | 7.5                    | 2               | 2           | 3.5                    | 1               | 2           |
| A6H704           | CHMP7       | CHMP7 protein                                                 | 50.644  | 12.2                   | 3               | 3           | 9.3                    | 5               | 7           |
| Q29RL2           | CHORDC1     | Cysteine and histidine-rich domain-containing protein 1       | 37.426  | 47.6                   | 12              | 20          | 16.6                   | 5               | 8           |
| Q3SYS6           | CHP1        | Calcineurin B homologous protein 1                            | 22.442  | 39                     | 7               | 14          | 24.6                   | 4               | 6           |
| F1MG93           | CHRD        | Chordin (Fragment)                                            | 99.785  | #N/A                   | #N/A            | #N/A        | 2                      | 2               | 2           |
| F6RFX1           | CHST12      | Uncharacterized protein                                       | 48.496  | 11.8                   | 4               | 4           | 9.1                    | 3               | 3           |
| E1BK55           | CHST6       | Uncharacterized protein                                       | 44.263  | 5.6                    | 3               | 6           | 5.6                    | 3               | 3           |
| Q32PJ6           | CIA01       | Probable cytosolic iron-sulfur protein assembly protein CIA01 | 37.773  | 10.6                   | 3               | 6           | 2.4                    | 1               | 1           |
| Q5EAC7           | CIAPIN1     | Anamorsin                                                     | 33.204  | 44.8                   | 12              | 30          | 6.1                    | 2               | 3           |
| E1BIR5           | CILP        | Uncharacterized protein                                       | 128.27  | 4.4                    | 5               | 7           | 1.9                    | 2               | 4           |
| Q3ZBU2           | CISD1       | CDGSH iron-sulfur domain-containing protein 1                 | 11.983  | 44.3                   | 4               | 17          | 45.3                   | 5               | 18          |
| Q05B71           | CISD2       | CDGSH iron-sulfur domain-containing protein 2                 | 15.278  | 55.6                   | 9               | 25          | 45.9                   | 6               | 22          |
| G3MWJ2           | CISD3       | Uncharacterized protein (Fragment)                            | 14.941  | #N/A                   | #N/A            | #N/A        | 23.7                   | 4               | 7           |
| F1ME65           | CKAP4       | Uncharacterized protein                                       | 64.529  | 8                      | 5               | 7           | 5.8                    | 3               | 4           |
| E1B7K5           | CKAP5       | Uncharacterized protein                                       | 225.12  | 16.2                   | 28              | 40          | 7.4                    | 16              | 33          |
| Q5EA61           | CKB         | Creatine kinase B-type                                        | 42.719  | 78.5                   | 23              | 209         | 47.8                   | 15              | 82          |
| Q9TTK8           | CKMT1       | Creatine kinase U-type,                                       | 46.896  | 62                     | 22              | 184         | 40.9                   | 17              | 219         |

| Accession number | Gene symbol | Discription                                              | MW(kDa) | Biological Replicate 1 |                 |             | Biological Replicate 2 |                 |             |
|------------------|-------------|----------------------------------------------------------|---------|------------------------|-----------------|-------------|------------------------|-----------------|-------------|
|                  |             |                                                          |         | Sequence coverage(%)   | Unique peptides | MS/MS count | Sequence coverage(%)   | Unique peptides | MS/MS count |
| Q2KJI1           | CKS2        | Cyclin-dependent kinases regulatory subunit 2            | 9.8602  | 11.4                   | 1               | 1           | 11.4                   | 1               | 1           |
| F1MFY6           | CL43        | Collectin-43                                             | 24.921  | #N/A                   | #N/A            | #N/A        | 8.2                    | 2               | 3           |
| E1BQ15           | CLASP2      | Uncharacterized protein                                  | 168.18  | 5.8                    | 7               | 7           | 4.6                    | 6               | 9           |
| Q1LZF8           | CLCC1       | Chloride channel CLIC-like protein                       | 61.811  | 11.8                   | 6               | 8           | 5.7                    | 3               | 6           |
| Q4F894           | CLCN4       | Chloride channel 4                                       | 84.892  | 7.8                    | 4               | 7           | 5.8                    | 4               | 7           |
| F1MN45           | CLCN5       | Uncharacterized protein (Fragment)                       | 90.782  | 3.9                    | 2               | 2           | 2.2                    | 1               | 1           |
| Q4PKH3           | CLCN7       | H(+)/Cl(-) exchange transporter 7                        | 88.83   | 1.5                    | 1               | 1           | #N/A                   | #N/A            | #N/A        |
| Q3SYT6           | CLGN        | Calmegin                                                 | 69.514  | 20.1                   | 9               | 27          | 5.3                    | 3               | 16          |
| Q5E9B7           | CLIC1       | Chloride intracellular channel                           | 26.992  | 39.8                   | 7               | 9           | 13.7                   | 3               | 4           |
| Q9XSA7           | CLIC4       | Chloride intracellular channel                           | 28.727  | 66.8                   | 13              | 53          | 36                     | 8               | 25          |
| A7Z035           | CLINT1      | Clathrin interactor 1                                    | 70.521  | 13.4                   | 7               | 8           | 4.2                    | 2               | 4           |
| E3W9A2           | CLIP1       | Uncharacterized protein                                  | 160.62  | 5.7                    | 7               | 8           | 8.2                    | 13              | 16          |
| E1BMT3           | CLN6        | Uncharacterized protein                                  | 35.784  | 10.6                   | 2               | 3           | 6.4                    | 1               | 2           |
| Q1LZ90           | CLNS1A      | Chloride channel, nucleotide-                            | 26.207  | 5.5                    | 1               | 1           | #N/A                   | #N/A            | #N/A        |
| Q5E9N5           | CLPB        | Caseinolytic peptidase B protein                         | 75.439  | 1.9                    | 1               | 1           | #N/A                   | #N/A            | #N/A        |
| F1N779           | CLPTM1      | Cleft lip and palate transmembrane protein 1 homolog     | 65.497  | 8                      | 3               | 4           | 4.5                    | 2               | 4           |
| F1N155           | CLPX        | Uncharacterized protein (Fragment)                       | 66.825  | 17.5                   | 9               | 12          | 9.4                    | 5               | 6           |
| P49951           | CLTC        | Clathrin heavy chain 1                                   | 191.59  | 61.6                   | 101             | 440         | 39.8                   | 64              | 355         |
| E1BIA7           | CLUH        | Clustered mitochondria protein                           | 147.14  | 2.6                    | 3               | 3           | 2.4                    | 3               | 4           |
| A6QL68           | CLYBL       | CLYBL protein                                            | 37.549  | 2.6                    | 1               | 2           | 8.5                    | 3               | 5           |
| Q2KIW9           | CMPK1       | UMP-CMP kinase                                           | 22.279  | 28.1                   | 5               | 10          | 5.1                    | 1               | 1           |
| A4IFB9           | CMTM4       | CMTM4 protein                                            | 22.877  | #N/A                   | #N/A            | #N/A        | 9.1                    | 2               | 6           |
| F1N680           | CMTM6       | Uncharacterized protein                                  | 20.209  | 6                      | 1               | 1           | #N/A                   | #N/A            | #N/A        |
| A2VE39           | CMTR1       | Cap-specific mRNA (nucleoside-2'-O-)-methyltransferase 1 | 95.141  | 15.7                   | 13              | 19          | 9.1                    | 9               | 15          |
| Q3TOQ6           | CNBP        | Cellular nucleic acid-binding                            | 18.742  | 25.3                   | 3               | 6           | 12.9                   | 2               | 3           |
| F1MWP9           | CNDP1       | Uncharacterized protein                                  | 56.69   | 12.4                   | 5               | 5           | #N/A                   | #N/A            | #N/A        |
| Q3ZC84           | CNDP2       | Cytosolic non-specific dipeptidase                       | 52.655  | 42.7                   | 19              | 46          | 16                     | 7               | 22          |
| Q3T126           | CNIH4       | Protein cornichon homolog 4                              | 16.049  | 14.4                   | 1               | 3           | #N/A                   | #N/A            | #N/A        |
| E1B9A8           | CNKSRI      | Uncharacterized protein                                  | 53.509  | 10.3                   | 3               | 4           | #N/A                   | #N/A            | #N/A        |

| Accession number | Gene symbol | Discription                                                    | MW(kDa) | Biological Replicate 1 |                 |             | Biological Replicate 2 |                 |             |
|------------------|-------------|----------------------------------------------------------------|---------|------------------------|-----------------|-------------|------------------------|-----------------|-------------|
|                  |             |                                                                |         | Sequence coverage(%)   | Unique peptides | MS/MS count | Sequence coverage(%)   | Unique peptides | MS/MS count |
| Q32L92           | CNN3        | Calponin-3                                                     | 36.357  | 38.9                   | 11              | 36          | 19.8                   | 6               | 18          |
| F1MD84           | CNNM1       | Uncharacterized protein (Fragment)                             | 103.2   | 1.3                    | 1               | 8           | #N/A                   | #N/A            | #N/A        |
| E1BIL3           | CNNM2       | Uncharacterized protein                                        | 94.346  | 2.9                    | 1               | 2           | #N/A                   | #N/A            | #N/A        |
| F1MK24           | CNNM4       | Uncharacterized protein (Fragment)                             | 72.172  | #N/A                   | #N/A            | #N/A        | 1.4                    | 1               | 1           |
| F1MHU9           | CNOT1       | Uncharacterized protein                                        | 266.31  | 0.9                    | 2               | 2           | 0.5                    | 1               | 1           |
| A4IFB6           | CNOT10      | CCR4-NOT transcription complex                                 | 81.983  | 7.7                    | 6               | 8           | 5.7                    | 5               | 6           |
| E1BHL0           | CNOT11      | Uncharacterized protein                                        | 55.242  | 16.2                   | 5               | 7           | 3.9                    | 2               | 4           |
| E1BCS1           | CNOT3       | Uncharacterized protein                                        | 80.786  | 2.4                    | 2               | 5           | 3.5                    | 3               | 7           |
| F1MWA7           | CNOT4       | Uncharacterized protein                                        | 70.88   | 6.5                    | 4               | 5           | 4                      | 2               | 3           |
| A6QR51           | CNOT6       | CNOT6 protein                                                  | 63.277  | 1.8                    | 1               | 1           | #N/A                   | #N/A            | #N/A        |
| E1BE73           | CNOT6L      | Uncharacterized protein (Fragment)                             | 47.802  | 2.4                    | 1               | 1           | #N/A                   | #N/A            | #N/A        |
| Q3ZC01           | CNOT7       | CCR4-NOT transcription complex                                 | 32.718  | 4.9                    | 1               | 2           | #N/A                   | #N/A            | #N/A        |
| E1BJH0           | CNOT8       | Uncharacterized protein                                        | 33.54   | 4.8                    | 1               | 1           | 3.8                    | 1               | 1           |
| P06623           | CNP         | 2,3-cyclic-nucleotide 3-                                       | 44.875  | 19                     | 8               | 14          | 16.5                   | 7               | 15          |
| Q1LZ72           | CNPY2       | Canopy 2 homolog (Zebrafish)                                   | 20.668  | 14.3                   | 2               | 3           | 5.5                    | 1               | 3           |
| Q3SWX1           | CNPY4       | Protein canopy homolog 4                                       | 27.368  | 4.2                    | 1               | 1           | #N/A                   | #N/A            | #N/A        |
| Q17QM9           | CNRIP1      | CB1 cannabinoid receptor-interacting protein 1                 | 18.664  | 39                     | 5               | 7           | 11.6                   | 2               | 3           |
| E1BC04           | CNST        | Uncharacterized protein                                        | 79.437  | 1.2                    | 1               | 4           | #N/A                   | #N/A            | #N/A        |
| Q3TOE3           | COA3        | Cytochrome c oxidase assembly protein 3 homolog, mitochondrial | 11.707  | 17.9                   | 2               | 4           | 8.5                    | 1               | 3           |
| E1BEL9           | COASY       | Uncharacterized protein                                        | 61.799  | 27.8                   | 10              | 22          | 5.3                    | 3               | 5           |
| F1N290           | COBLL1      | Uncharacterized protein (Fragment)                             | 52.228  | 5.2                    | 2               | 3           | #N/A                   | #N/A            | #N/A        |
| E1BK29           | COG1        | Uncharacterized protein                                        | 108.26  | 8.3                    | 6               | 7           | 2.5                    | 3               | 3           |
| F1MQ89           | COG2        | Uncharacterized protein                                        | 83.423  | 7.3                    | 4               | 8           | 3.4                    | 3               | 5           |
| E1BGA6           | COG3        | Uncharacterized protein                                        | 94.284  | 9.7                    | 6               | 10          | 6.9                    | 6               | 6           |
| Q3MHG0           | COG4        | Conserved oligomeric Golgi complex subunit 4                   | 88.855  | 8.3                    | 5               | 7           | 4.1                    | 4               | 4           |
| F1N1T8           | COG5        | Conserved oligomeric Golgi complex subunit 5 (Fragment)        | 91.195  | 6.9                    | 5               | 9           | 9.7                    | 8               | 11          |
| Q3SZI7           | COG6        | Conserved oligomeric Golgi complex subunit 6                   | 73.301  | 13.4                   | 7               | 9           | 2.9                    | 2               | 5           |

| Accession number | Gene symbol | Discription                                                    | MW(kDa) | Biological Replicate 1 |                 |             | Biological Replicate 2 |                 |             |
|------------------|-------------|----------------------------------------------------------------|---------|------------------------|-----------------|-------------|------------------------|-----------------|-------------|
|                  |             |                                                                |         | Sequence coverage(%)   | Unique peptides | MS/MS count | Sequence coverage(%)   | Unique peptides | MS/MS count |
| Q58CW1           | COQ7        | COQ7 protein                                                   | 20.246  | 20.7                   | 4               | 6           | 9.5                    | 2               | 6           |
| Q2NL34           | COQ9        | Ubiquinone biosynthesis protein COQ9, mitochondrial            | 35.778  | 17.6                   | 5               | 8           | 2.8                    | 1               | 5           |
| A6QLZ8           | CORO6       | Coronin                                                        | 48.067  | 22.7                   | 8               | 23          | 13.5                   | 5               | 13          |
| Q0V8F1           | CORO7       | Coronin-7                                                      | 99.251  | 1.7                    | 1               | 1           | #N/A                   | #N/A            | #N/A        |
| F1N5P2           | COX18       | Uncharacterized protein                                        | 37.319  | 13                     | 4               | 5           | #N/A                   | #N/A            | #N/A        |
| Q6QTG5           | COX3        | Cytochrome c oxidase subunit 3                                 | 29.845  | 5.4                    | 1               | 4           | #N/A                   | #N/A            | #N/A        |
| P00423           | COX4I1      | Cytochrome c oxidase subunit 4 isoform 1, mitochondrial        | 19.571  | 37.9                   | 7               | 33          | 29.6                   | 6               | 17          |
| P00426           | COX5A       | Cytochrome c oxidase subunit 5A, mitochondrial                 | 16.735  | 21.7                   | 4               | 8           | 26.3                   | 5               | 11          |
| P00428           | COX5B       | Cytochrome c oxidase subunit 5B, mitochondrial                 | 13.834  | 18.6                   | 3               | 6           | 27.9                   | 4               | 11          |
| P00429           | COX6B1      | Cytochrome c oxidase subunit 6B1                               | 10.156  | 11.6                   | 1               | 1           | #N/A                   | #N/A            | #N/A        |
| P04038           | COX6C       | Cytochrome c oxidase subunit 6C                                | 8.6101  | 20.3                   | 2               | 2           | 20.3                   | 2               | 6           |
| Q3T061           | COX7A2L     | Cytochrome c oxidase subunit 7A-related protein, mitochondrial | 12.543  | #N/A                   | #N/A            | #N/A        | 14                     | 2               | 2           |
| P00730           | CPA1        | Carboxypeptidase A1                                            | 47.081  | 26.7                   | 11              | 25          | 19.8                   | 9               | 40          |
| F1MSH0           | CPEB1       | Uncharacterized protein (Fragment)                             | 55.722  | 27.7                   | 9               | 15          | 8.7                    | 5               | 14          |
| A7MBD9           | CPM         | CPM protein                                                    | 50.318  | 5.9                    | 2               | 6           | 1.6                    | 1               | 3           |
| Q08DB4           | CPNE1       | Copine I                                                       | 58.922  | 7.1                    | 3               | 6           | #N/A                   | #N/A            | #N/A        |
| F1MLJ3           | CPNE4       | Uncharacterized protein                                        | 28.104  | #N/A                   | #N/A            | #N/A        | 3.5                    | 1               | 1           |
| A5D784           | CPNE8       | CPNE8 protein                                                  | 63.086  | 3.5                    | 2               | 2           | #N/A                   | #N/A            | #N/A        |
| E1BKY9           | CPOX        | Uncharacterized protein                                        | 50.38   | 24.1                   | 9               | 21          | 3.8                    | 2               | 3           |
| Q58DC0           | CPPED1      | Calcineurin-like phosphoesterase domain-containing protein 1   | 35.409  | 24.9                   | 6               | 11          | 11.8                   | 4               | 9           |
| Q10568           | CPSF2       | Cleavage and polyadenylation specificity factor subunit 2      | 88.416  | 3.2                    | 3               | 3           | 0.9                    | 1               | 2           |
| P79101           | CPSF3       | Cleavage and polyadenylation specificity factor subunit 3      | 77.487  | 2.8                    | 2               | 2           | 2.9                    | 2               | 2           |
| Q0P5D2           | CPSF6       | Cleavage and polyadenylation specificity factor subunit 6      | 59.255  | 5.4                    | 2               | 2           | #N/A                   | #N/A            | #N/A        |

| Accession number | Gene symbol | Discription                                                  | MW(kDa) | Biological Replicate 1 |                 |             | Biological Replicate 2 |                 |             |
|------------------|-------------|--------------------------------------------------------------|---------|------------------------|-----------------|-------------|------------------------|-----------------|-------------|
|                  |             |                                                              |         | Sequence coverage(%)   | Unique peptides | MS/MS count | Sequence coverage(%)   | Unique peptides | MS/MS count |
| A2VDR8           | COG7        | Conserved oligomeric Golgi complex subunit 7                 | 86.526  | 10.8                   | 7               | 8           | 4.8                    | 4               | 4           |
| Q2TBH9           | COG8        | Conserved oligomeric Golgi complex subunit 8                 | 69.781  | 7.8                    | 5               | 7           | 5.4                    | 4               | 5           |
| F1MSR8           | COL2A1      | Collagen alpha-1(II) chain                                   | 134.43  | 2.5                    | 4               | 7           | 2.5                    | 4               | 9           |
| A4FUB5           | COMMD10     | COMMD10 protein                                              | 22.935  | 10.4                   | 2               | 3           | 4                      | 1               | 1           |
| A7YWP6           | COMMD2      | COMMD2 protein                                               | 22.773  | 27.1                   | 7               | 11          | 18.1                   | 4               | 16          |
| Q5E9K1           | COMMD5      | COMM domain-containing protein 5                             | 24.502  | 23.2                   | 5               | 7           | 5.4                    | 1               | 1           |
| Q3MHX1           | COMMD7      | COMM domain-containing protein 7                             | 22.534  | 24.5                   | 5               | 6           | 11.5                   | 3               | 4           |
| F1N7D3           | COMMD8      | Uncharacterized protein                                      | 21.128  | 15.3                   | 4               | 6           | 16.9                   | 4               | 6           |
| Q2TBN5           | COMMD9      | COMM domain-containing protein 9                             | 21.781  | 16.7                   | 2               | 3           | 9.6                    | 2               | 3           |
| Q27954           | COPA        | Coatomer subunit alpha                                       | 138.36  | 54.9                   | 59              | 138         | 25.7                   | 34              | 89          |
| A0JN39           | COPB1       | Coatomer subunit beta                                        | 107.13  | 47.1                   | 38              | 81          | 19.9                   | 15              | 30          |
| P35605           | COPB2       | Coatomer subunit beta                                        | 102.39  | 49.1                   | 36              | 75          | 22.3                   | 19              | 39          |
| Q28104           | COPE        | Coatomer subunit epsilon                                     | 34.481  | 22.7                   | 8               | 15          | 10.4                   | 3               | 4           |
| P53620           | COPG1       | Coatomer subunit gamma-1                                     | 97.385  | 49.8                   | 29              | 72          | 11.4                   | 8               | 29          |
| A2VE21           | COPG2       | Coatomer subunit gamma-2                                     | 97.564  | 11.9                   | 6               | 7           | 6.7                    | 4               | 5           |
| G3X736           | COPS2       | Uncharacterized protein                                      | 52.404  | 31.6                   | 13              | 25          | 10.9                   | 5               | 15          |
| A6H7B5           | COPS3       | COP9 signalosome complex subunit 3                           | 47.799  | 24.1                   | 8               | 15          | 9.9                    | 4               | 8           |
| Q3SZA0           | COPS4       | COP9 signalosome complex subunit 4                           | 46.284  | 60.6                   | 18              | 37          | 27.8                   | 11              | 33          |
| F1MBP8           | COPS5       | Uncharacterized protein                                      | 37.564  | 39.5                   | 12              | 21          | 5.7                    | 2               | 2           |
| F1MG10           | COPS6       | COP9 signalosome complex subunit 6                           | 35.966  | 53.1                   | 13              | 22          | 14.2                   | 5               | 9           |
| Q2KI56           | COPS7B      | COP9 signalosome complex subunit 7b                          | 29.595  | 21.2                   | 5               | 12          | #N/A                   | #N/A            | #N/A        |
| A4FV74           | COPS8       | COPS8 protein                                                | 23.201  | 42.6                   | 5               | 12          | 20.1                   | 3               | 6           |
| P35604           | COPZ1       | Coatomer subunit zeta-1                                      | 20.228  | 21.5                   | 4               | 11          | 19.2                   | 3               | 5           |
| F1MXE6           | COPZ2       | Uncharacterized protein (Fragment)                           | 21.005  | 5.9                    | 1               | 2           | 5.9                    | 1               | 1           |
| F1MK72           | COQ10B      | Uncharacterized protein                                      | 27.785  | #N/A                   | #N/A            | #N/A        | 3.3                    | 1               | 1           |
| Q3T131           | COQ3        | Hexaprenyldihydroxybenzoate methyltransferase, mitochondrial | 41.49   | #N/A                   | #N/A            | #N/A        | 6.8                    | 2               | 3           |
| Q0P5A2           | COQ5        | 2-methoxy-6-polyprenyl-1,4-benzoquinol methylase,            | 37.591  | 7.9                    | 2               | 3           | #N/A                   | #N/A            | #N/A        |
| Q2KIL4           | COQ6        | Ubiquinone biosynthesis                                      | 51.072  | 4.7                    | 2               | 2           | 7.7                    | 3               | 4           |

| Accession number | Gene symbol | Discription                                        | MW(kDa) | Biological Replicate 1 |                 |             | Biological Replicate 2 |                 |             |
|------------------|-------------|----------------------------------------------------|---------|------------------------|-----------------|-------------|------------------------|-----------------|-------------|
|                  |             |                                                    |         | Sequence coverage(%)   | Unique peptides | MS/MS count | Sequence coverage(%)   | Unique peptides | MS/MS count |
| Q58DK1           | CPT1B       | Carnitine 0-palmitoyltransferase 1, muscle isoform | 88.511  | #N/A                   | #N/A            | #N/A        | 1.2                    | 1               | 2           |
| Q2KJB7           | CPT2        | Carnitine 0-palmitoyltransferase 2, mitochondrial  | 74.482  | 13.4                   | 7               | 11          | 3.5                    | 3               | 3           |
| Q0VCQ0           | CPTP        | Ceramide-1-phosphate transfer                      | 24.574  | 8.9                    | 2               | 3           | #N/A                   | #N/A            | #N/A        |
| Q5PXY7           | CRABP2      | Cellular retinoic acid-binding                     | 15.735  | 6.5                    | 1               | 1           | 6.5                    | 1               | 1           |
| F1MX50           | CREG1       | Uncharacterized protein                            | 23.958  | 26.2                   | 4               | 8           | 11.3                   | 2               | 9           |
| Q5EA46           | CRELD1      | Cysteine-rich with EGF-like domain protein 1       | 45.368  | #N/A                   | #N/A            | #N/A        | 1.9                    | 1               | 1           |
| Q2KIT5           | CRELD2      | Cysteine-rich with EGF-like domain protein 2       | 38.229  | #N/A                   | #N/A            | #N/A        | 5.4                    | 2               | 6           |
| E1BQ32           | CRK         | Uncharacterized protein                            | 33.83   | 28                     | 7               | 13          | 8.6                    | 3               | 4           |
| G3N016           | CRKL        | Uncharacterized protein                            | 33.386  | 11                     | 2               | 2           | #N/A                   | #N/A            | #N/A        |
| E1BCF2           | CRLF3       | Uncharacterized protein                            | 49.406  | 15.7                   | 6               | 11          | 8.9                    | 5               | 14          |
| O19094           | CROT        | Peroxisomal carnitine 0-octanoyltransferase        | 70.263  | 47.9                   | 23              | 51          | 15.8                   | 11              | 32          |
| C4T8B4           | CRP         | C-reactive protein                                 | 25.292  | 14.3                   | 3               | 5           | #N/A                   | #N/A            | #N/A        |
| E1BDQ1           | CRYGN       | Uncharacterized protein                            | 21.371  | 26.9                   | 4               | 5           | 7.7                    | 2               | 2           |
| O97764           | CRYZ        | Zeta-crystallin                                    | 35.382  | 55.8                   | 15              | 46          | 29.7                   | 9               | 50          |
| Q59A28           | CRYZL1      | Quinone oxidoreductase-like protein                | 38.811  | 16.3                   | 5               | 8           | 2.9                    | 1               | 2           |
| Q29RK1           | CS          | Citrate synthase, mitochondrial                    | 51.772  | 35.2                   | 15              | 52          | 27.5                   | 13              | 61          |
| F1MS94           | CSDE1       | Uncharacterized protein                            | 85.803  | 22.9                   | 18              | 32          | 10.2                   | 9               | 14          |
| F1MWN1           | CSE1L       | Exportin-2                                         | 110.4   | 42                     | 41              | 110         | 14.3                   | 16              | 47          |
| Q0VBZ0           | CSK         | Tyrosine-protein kinase CSK                        | 50.633  | 1.8                    | 1               | 2           | #N/A                   | #N/A            | #N/A        |
| P67827           | CSNK1A1     | Casein kinase I isoform alpha                      | 37.567  | #N/A                   | #N/A            | #N/A        | 7.4                    | 3               | 4           |
| E1BGK5           | CSNK1D      | Casein kinase I isoform delta                      | 21.271  | 6.4                    | 1               | 3           | #N/A                   | #N/A            | #N/A        |
| E1BNW0           | CSNK1G1     | Casein kinase I isoform gamma-1                    | 50.385  | 4.1                    | 2               | 2           | #N/A                   | #N/A            | #N/A        |
| P68399           | CSNK2A1     | Casein kinase II subunit alpha                     | 45.143  | 47.8                   | 14              | 30          | 17.6                   | 5               | 9           |
| P20427           | CSNK2A2     | Casein kinase II subunit alpha                     | 41.27   | 56                     | 16              | 28          | 22.6                   | 7               | 13          |
| P67868           | CSNK2B      | Casein kinase II subunit beta                      | 24.942  | 33.5                   | 8               | 28          | 19.5                   | 4               | 12          |
| Q32LE9           | CSRP2       | Cysteine and glycine-rich protein 2                | 20.954  | 5.2                    | 1               | 1           | #N/A                   | #N/A            | #N/A        |
| E1BE91           | CSRP2BP     | Uncharacterized protein                            | 82.434  | #N/A                   | #N/A            | #N/A        | 1.1                    | 1               | 3           |



| Accession number | Gene symbol | Discription                                    | MW(kDa) | Biological Replicate 1 |                 |             | Biological Replicate 2 |                 |             |
|------------------|-------------|------------------------------------------------|---------|------------------------|-----------------|-------------|------------------------|-----------------|-------------|
|                  |             |                                                |         | Sequence coverage(%)   | Unique peptides | MS/MS count | Sequence coverage(%)   | Unique peptides | MS/MS count |
| P25417           | CSTB        | Cystatin-B                                     | 11.139  | 50                     | 4               | 16          | 37.8                   | 4               | 10          |
| F1MDR5           | CTAGE5      | Uncharacterized protein                        | 92.323  | 1.5                    | 1               | 1           | 2.8                    | 2               | 3           |
| F1MYP4           | CTBP1       | Uncharacterized protein                        | 45.303  | #N/A                   | #N/A            | #N/A        | 1.9                    | 1               | 1           |
| Q58DW2           | CTH         | Cystathionine gamma-lyase                      | 44.405  | 49.6                   | 14              | 37          | 10.6                   | 4               | 16          |
| Q3MHM6           | CTNNA1      | Catenin alpha-1                                | 100.13  | 26.4                   | 22              | 29          | 17.7                   | 14              | 23          |
| G3N018           | CTNNA3      | Uncharacterized protein                        | 99.932  | #N/A                   | #N/A            | #N/A        | 2.2                    | 1               | 1           |
| Q0VCX4           | CTNNB1      | Catenin beta-1                                 | 85.51   | 29.7                   | 15              | 42          | 17.9                   | 13              | 30          |
| E1BQ11           | CTNND1      | Uncharacterized protein                        | 106.86  | 24.6                   | 21              | 37          | 11.5                   | 12              | 17          |
| F1MM16           | CTNND2      | Uncharacterized protein (Fragment)             | 122.98  | 0.9                    | 1               | 2           | #N/A                   | #N/A            | #N/A        |
| A0JNE9           | CTPS        | CTP synthase                                   | 66.753  | 33.8                   | 14              | 34          | 13.4                   | 7               | 19          |
| Q1RMS2           | CTPS2       | CTP synthase 2                                 | 65.48   | 7.3                    | 1               | 1           | 3.6                    | 1               | 1           |
| P07688           | CTSB        | Cathepsin B                                    | 36.661  | 20.6                   | 6               | 15          | 14                     | 5               | 12          |
| Q3ZCJ8           | CTSC        | Dipeptidyl peptidase 1                         | 51.948  | 2.4                    | 1               | 3           | #N/A                   | #N/A            | #N/A        |
| F1MMR6           | CTSD        | Cathepsin D                                    | 44.704  | 29.4                   | 12              | 44          | 18.7                   | 9               | 36          |
| Q0VCU3           | CTSF        | Cathepsin F                                    | 50.893  | 4.6                    | 2               | 2           | 2.2                    | 1               | 1           |
| Q3T0I2           | CTSH        | Pro-cathepsin H                                | 37.351  | 4.5                    | 2               | 2           | #N/A                   | #N/A            | #N/A        |
| P05689           | CTSZ        | Cathepsin Z                                    | 33.886  | 14.1                   | 4               | 9           | 9.5                    | 3               | 10          |
| Q1RMR3           | CTTN        | Cortactin                                      | 60.265  | 18.4                   | 11              | 23          | 22.9                   | 13              | 21          |
| A7MB95           | CUGBP1      | CUGBP1 protein                                 | 51.949  | 10.1                   | 5               | 13          | 5.3                    | 3               | 9           |
| F1MYD0           | CUL1        | Uncharacterized protein                        | 89.66   | 34                     | 23              | 36          | 15.1                   | 10              | 20          |
| Q08DE9           | CUL2        | CUL2 protein                                   | 86.955  | 23.9                   | 15              | 31          | 5.6                    | 5               | 8           |
| E1BIN5           | CUL3        | Uncharacterized protein                        | 88.958  | 55.1                   | 40              | 94          | 21.7                   | 18              | 44          |
| F1N3S4           | CUL4A       | Uncharacterized protein (Fragment)             | 83.885  | 17.9                   | 4               | 8           | 6.7                    | 2               | 3           |
| E1BFD5           | CUL4B       | Uncharacterized protein (Fragment)             | 109.85  | 25.2                   | 15              | 33          | 5.4                    | 3               | 14          |
| F1N7B5           | CUL5        | Uncharacterized protein                        | 88.5    | 17.5                   | 13              | 22          | 3.6                    | 3               | 4           |
| F1MTI7           | CUTA        | Protein CutA                                   | 16.446  | 9.1                    | 1               | 1           | #N/A                   | #N/A            | #N/A        |
| Q8WMV3           | CXADR       | Coxsackievirus and adenovirus receptor homolog | 40.153  | #N/A                   | #N/A            | #N/A        | 4.9                    | 2               | 2           |
| P25930           | CXCR4       | C-X-C chemokine receptor type 4                | 39.938  | 3.4                    | 1               | 2           | #N/A                   | #N/A            | #N/A        |
| G3X6Y2           | CXorf38     | Uncharacterized protein                        | 36.471  | 13.8                   | 5               | 6           | 6.3                    | 2               | 3           |
| A5D9A7           | CYB561A3    | Cytochrome b ascorbate-dependent               | 29.803  | 3.4                    | 1               | 1           | #N/A                   | #N/A            | #N/A        |
| P00171           | CYB5A       | Cytochrome b5                                  | 15.329  | 47.8                   | 5               | 16          | 25.4                   | 3               | 10          |

| Accession number | Gene symbol | Discription                                                            | MW(kDa) | Biological Replicate 1 |                 |             | Biological Replicate 2 |                 |             |
|------------------|-------------|------------------------------------------------------------------------|---------|------------------------|-----------------|-------------|------------------------|-----------------|-------------|
|                  |             |                                                                        |         | Sequence coverage(%)   | Unique peptides | MS/MS count | Sequence coverage(%)   | Unique peptides | MS/MS count |
| Q0P5F6           | CYB5B       | CYB5B protein                                                          | 16.278  | 10.3                   | 2               | 4           | #N/A                   | #N/A            | #N/A        |
| G5E5N5           | CYB5R1      | NADH-cytochrome b5 reductase 1                                         | 33.678  | 48.8                   | 12              | 29          | 13.2                   | 5               | 16          |
| P07514           | CYB5R3      | NADH-cytochrome b5 reductase 3                                         | 34.121  | 62.1                   | 20              | 79          | 22.6                   | 8               | 39          |
| P00125           | CYC1        | Cytochrome c1, heme protein,                                           | 35.296  | 34.5                   | 10              | 23          | 24.9                   | 7               | 24          |
| E1BN47           | CYFIP1      | Uncharacterized protein                                                | 148.79  | 17.7                   | 11              | 30          | 4.6                    | 6               | 10          |
| F1MX60           | CYFIP2      | Uncharacterized protein                                                | 148.47  | 9.9                    | 1               | 2           | #N/A                   | #N/A            | #N/A        |
| Q1RMU2           | CYLD        | Ubiquitin carboxyl-terminal                                            | 106.8   | 2.1                    | 2               | 2           | #N/A                   | #N/A            | #N/A        |
| Q2KI41           | CYTH2       | Cytohesin-2                                                            | 47.492  | 10.5                   | 3               | 7           | #N/A                   | #N/A            | #N/A        |
| Q1JPD3           | D2HGDH      | D-2-hydroxyglutarate dehydrogenase, mitochondrial                      | 59.056  | 24.6                   | 12              | 35          | 17.6                   | 9               | 30          |
| A2VDK3           | DAAM1       | Dishevelled associated activator of morphogenesis 1                    | 122.29  | 0.8                    | 1               | 1           | 1.6                    | 2               | 2           |
| Q5E9C2           | DAD1        | Dolichyl-diphosphooligosaccharide--protein glycosyltransferase subunit | 12.495  | 28.3                   | 3               | 4           | 8.8                    | 1               | 2           |
| P82922           | DAP3        | 28S ribosomal protein S29,                                             | 45.565  | 3.5                    | 1               | 1           | #N/A                   | #N/A            | #N/A        |
| F1MTX7           | DARS        | Aspartate--tRNA ligase, cytoplasmic                                    | 57.051  | 33.1                   | 1               | 3           | 30.1                   | 1               | 38          |
| F1MEQ5           | DARS2       | Uncharacterized protein                                                | 73.747  | 4.3                    | 2               | 3           | #N/A                   | #N/A            | #N/A        |
| E1BAK6           | DAZAP1      | Uncharacterized protein (Fragment)                                     | 42.367  | 14.4                   | 4               | 4           | 7.8                    | 2               | 2           |
| P07107           | DBI         | Acyl-CoA-binding protein                                               | 10.044  | 20.7                   | 1               | 2           | 11.5                   | 2               | 2           |
| Q1RMT6           | DBN1        | Drebrin 1                                                              | 72.16   | 3.5                    | 2               | 2           | #N/A                   | #N/A            | #N/A        |
| A6H7G2           | DBNL        | Drebrin-like protein                                                   | 47.722  | 16.1                   | 7               | 12          | 7.1                    | 3               | 5           |
| F1N3H0           | DCAF8       | Uncharacterized protein                                                | 66.07   | 10.8                   | 6               | 8           | 4.1                    | 3               | 6           |
| Q3ZBS0           | DCAKD       | Dephospho-CoA kinase domain-containing protein                         | 26.384  | 24.7                   | 6               | 10          | #N/A                   | #N/A            | #N/A        |
| E1BLC5           | DCLK2       | Uncharacterized protein                                                | 77.465  | #N/A                   | #N/A            | #N/A        | 4.1                    | 2               | 2           |
| F1N417           | DCPIA       | Uncharacterized protein                                                | 62.782  | 4                      | 2               | 4           | #N/A                   | #N/A            | #N/A        |
| Q8MJJ7           | DCPS        | m7GpppX diphosphatase                                                  | 38.402  | 19.6                   | 5               | 5           | #N/A                   | #N/A            | #N/A        |
| F1MIC9           | DCTN1       | Uncharacterized protein                                                | 136.89  | 34.9                   | 33              | 58          | 18.2                   | 21              | 43          |
| Q3ZCF0           | DCTN2       | Dynactin subunit 2                                                     | 44.294  | 26.8                   | 10              | 19          | 19.6                   | 8               | 32          |
| Q0P5A1           | DCTN3       | Dynactin subunit 3                                                     | 21.191  | 33.3                   | 7               | 12          | 19.4                   | 4               | 8           |
| E1BBI8           | DCTN4       | Uncharacterized protein                                                | 53.223  | 22.1                   | 8               | 13          | 7.1                    | 3               | 6           |
| Q148G7           | DCTN6       | Dynactin subunit 6                                                     | 20.675  | #N/A                   | #N/A            | #N/A        | 5.3                    | 1               | 3           |

| Accession number | Gene symbol | Discription                         | MW(kDa) | Biological Replicate 1 |                 |             | Biological Replicate 2 |                 |             |
|------------------|-------------|-------------------------------------|---------|------------------------|-----------------|-------------|------------------------|-----------------|-------------|
|                  |             |                                     |         | Sequence coverage(%)   | Unique peptides | MS/MS count | Sequence coverage(%)   | Unique peptides | MS/MS count |
| F1MDM6           | DCUN1D1     | DCN1-like protein                   | 28.278  | 16.8                   | 4               | 7           | 11.9                   | 3               | 3           |
| Q1RMX9           | DCUN1D5     | DCN1-like protein 5                 | 27.362  | 4.2                    | 1               | 1           | #N/A                   | #N/A            | #N/A        |
| A1A4K3           | DDB1        | DNA damage-binding protein 1        | 126.93  | 38.7                   | 40              | 72          | 15.1                   | 18              | 36          |
| F1MSS2           | DDHD2       | Uncharacterized protein             | 80.95   | 23.3                   | 14              | 29          | 6.2                    | 5               | 12          |
| P31228           | DDO         | D-aspartate oxidase                 | 37.659  | 38.7                   | 11              | 36          | 21.1                   | 6               | 11          |
| F1N632           | DDOST       | Uncharacterized protein             | 47.303  | 45.3                   | 17              | 43          | 18.9                   | 9               | 14          |
| Q1LZB0           | DDRGK1      | DDRGK domain-containing protein 1   | 35.667  | 19.8                   | 4               | 6           | 6.4                    | 2               | 2           |
| A5PK65           | DDT         | D-dopachrome decarboxylase          | 12.877  | 79.7                   | 8               | 21          | 28.8                   | 3               | 7           |
| Q0I1K5           | DDX1        | ATP-dependent RNA helicase DDX1     | 82.413  | 30.1                   | 20              | 33          | 18.5                   | 15              | 34          |
| Q3ZBV2           | DDX19A      | ATP-dependent RNA helicase DDX19A   | 53.985  | 20.9                   | 9               | 14          | 10.5                   | 5               | 11          |
| F1MRW7           | DDX20       | Uncharacterized protein             | 92.665  | 1.8                    | 1               | 2           | 1.2                    | 1               | 2           |
| Q2TBP1           | DDX25       | ATP-dependent RNA helicase DDX25    | 54.618  | 2.1                    | 1               | 1           | #N/A                   | #N/A            | #N/A        |
| Q3T147           | DDX39B      | Spliceosome RNA helicase DDX39B     | 48.964  | 21.3                   | 9               | 15          | 4.7                    | 2               | 4           |
| G5E631           | DDX3X       | Uncharacterized protein             | 73.127  | 47.5                   | 26              | 77          | 28.7                   | 18              | 50          |
| Q5W5U4           | DDX4        | Probable ATP-dependent RNA helicase | 79.443  | 22.8                   | 11              | 17          | 6.2                    | 3               | 3           |
| Q29S22           | DDX47       | Probable ATP-dependent RNA helicase | 50.912  | 2.2                    | 1               | 1           | #N/A                   | #N/A            | #N/A        |
| F1MBQ8           | DDX5        | Uncharacterized protein             | 69.147  | 13.5                   | 7               | 8           | 7.8                    | 5               | 6           |
| G3MYF0           | DDX53       | Uncharacterized protein (Fragment)  | 68.457  | 7.4                    | 5               | 6           | 4.3                    | 3               | 6           |
| E1BDM8           | DDX6        | Uncharacterized protein             | 54.376  | 61.7                   | 27              | 98          | 36.9                   | 15              | 58          |
| F1N5J8           | DECR1       | Uncharacterized protein             | 35.352  | 39.5                   | 9               | 22          | 28                     | 8               | 20          |
| Q3ZBW6           | DECR2       | 2,4-dienoyl CoA reductase 2,        | 24.027  | 12.4                   | 2               | 3           | 7.5                    | 2               | 2           |
| A5PK34           | DEF6        | DEF6 protein                        | 73.73   | 1.6                    | 1               | 1           | #N/A                   | #N/A            | #N/A        |
| Q3ZBY7           | DEGS1       | Sphingolipid delta(4)-desaturase    | 38.07   | 14.9                   | 3               | 4           | 4.6                    | 1               | 1           |
| F1N032           | DENND4C     | Uncharacterized protein             | 216.28  | 0.3                    | 1               | 1           | #N/A                   | #N/A            | #N/A        |
| E1BIJ1           | DEPDC7      | Uncharacterized protein             | 58.804  | 35.8                   | 18              | 29          | 12.1                   | 7               | 15          |
| Q71SS4           | DERL1       | Derlin-1                            | 28.864  | 19.1                   | 5               | 7           | 11.6                   | 3               | 7           |
| F6PVF9           | DERL2       | Uncharacterized protein             | 27.567  | 17.2                   | 2               | 4           | #N/A                   | #N/A            | #N/A        |
| Q0P5E4           | DERL3       | Derlin-3                            | 26.248  | #N/A                   | #N/A            | #N/A        | 3.5                    | 1               | 1           |
| Q0VC37           | DFFA        | DNAation factor, 45kDa, alpha       | 36.432  | #N/A                   | #N/A            | #N/A        | 5.2                    | 2               | 6           |
| Q58CZ0           | DFFB        | DNA fragmentation factor subunit    | 38.967  | 1.8                    | 1               | 1           | 1.8                    | 1               | 2           |
| E1BFC3           | DFNA5       | Uncharacterized protein             | 54.888  | 2.6                    | 1               | 1           | #N/A                   | #N/A            | #N/A        |
| F1MIW3           | DGAT1       | O-acyltransferase                   | 54.896  | 3.9                    | 2               | 3           | #N/A                   | #N/A            | #N/A        |



| Accession number | Gene symbol | Discription                                                                                                     | MW(kDa) | Biological Replicate 1 |                 |             | Biological Replicate 2 |                 |             |
|------------------|-------------|-----------------------------------------------------------------------------------------------------------------|---------|------------------------|-----------------|-------------|------------------------|-----------------|-------------|
|                  |             |                                                                                                                 |         | Sequence coverage(%)   | Unique peptides | MS/MS count | Sequence coverage(%)   | Unique peptides | MS/MS count |
| P11179           | DLST        | Dihydrolipoyllsine-residue succinyltransferase component of 2-oxoglutarate dehydrogenase complex, mitochondrial | 48.972  | 42                     | 18              | 90          | 31                     | 15              | 86          |
| Q1LZ99           | DMAP1       | DNA methyltransferase 1 associated protein 1                                                                    | 53.079  | 3.4                    | 1               | 1           | #N/A                   | #N/A            | #N/A        |
| F1MDJ6           | DMGDH       | Uncharacterized protein                                                                                         | 97.269  | 2.1                    | 2               | 2           | #N/A                   | #N/A            | #N/A        |
| E1BMP7           | DNA2        | DNA replication ATP-dependent helicase/nuclease DNA2                                                            | 120.48  | 1.1                    | 1               | 2           | #N/A                   | #N/A            | #N/A        |
| Q5E954           | DNAJA1      | DnaJ homolog subfamily A member 1                                                                               | 44.882  | 37.3                   | 11              | 23          | 20.7                   | 9               | 21          |
| Q2HJ94           | DNAJA2      | DnaJ homolog subfamily A member 2                                                                               | 45.761  | 25.2                   | 9               | 16          | 13.6                   | 6               | 22          |
| A1A4J9           | DNAJA3      | DnaJ (Hsp40) homolog, subfamily A, member 3                                                                     | 49.253  | 22.1                   | 12              | 22          | 14.8                   | 7               | 20          |
| F1N6Q0           | DNAJA4      | Uncharacterized protein                                                                                         | 44.753  | 11.8                   | 5               | 9           | 6.3                    | 3               | 6           |
| Q3MI00           | DNAJB1      | DnaJ homolog subfamily B member 1                                                                               | 38.217  | 47.4                   | 18              | 35          | 23.5                   | 8               | 22          |
| Q3ZBA6           | DNAJB11     | DnaJ homolog subfamily B member 11                                                                              | 40.503  | 30.2                   | 11              | 18          | 16.8                   | 7               | 22          |
| F1MII1           | DNAJB12     | DnaJ homolog subfamily B member 12                                                                              | 41.275  | 3                      | 1               | 1           | 8.7                    | 3               | 4           |
| Q0III6           | DNAJB6      | DnaJ homolog subfamily B member 6                                                                               | 26.943  | 12.8                   | 3               | 3           | 16.1                   | 4               | 5           |
| G3MZ88           | DNAJB9      | Uncharacterized protein                                                                                         | 25.715  | 6.3                    | 1               | 1           | #N/A                   | #N/A            | #N/A        |
| F1N151           | DNAJC10     | Uncharacterized protein                                                                                         | 91.221  | 13.1                   | 10              | 17          | 2                      | 2               | 3           |
| Q2NL21           | DNAJC11     | DnaJ homolog subfamily C member 11                                                                              | 63.236  | 31.5                   | 15              | 36          | 11.6                   | 7               | 8           |
| F1MDR7           | DNAJC13     | Uncharacterized protein                                                                                         | 254.44  | 2.5                    | 5               | 8           | 0.4                    | 1               | 1           |
| A1A4R3           | DNAJC15     | DnaJ (Hsp40) homolog, subfamily C, member 15                                                                    | 15.85   | 6                      | 1               | 1           | #N/A                   | #N/A            | #N/A        |
| Q3ZBN8           | DNAJC19     | Mitochondrial import inner membrane translocase subunit TIM14                                                   | 12.498  | 7.8                    | 1               | 1           | #N/A                   | #N/A            | #N/A        |
| Q1RMH9           | DNAJC2      | DnaJ homolog subfamily C member 2                                                                               | 71.785  | 1.9                    | 1               | 1           | #N/A                   | #N/A            | #N/A        |
| Q27968           | DNAJC3      | DnaJ homolog subfamily C member 3                                                                               | 57.704  | 39.1                   | 19              | 37          | 20.6                   | 12              | 38          |
| Q29455           | DNAJC5      | DnaJ homolog subfamily C member 5                                                                               | 22.133  | 37.4                   | 4               | 9           | #N/A                   | #N/A            | #N/A        |
| F1N7H0           | DNAJC7      | Uncharacterized protein                                                                                         | 57.068  | 23.4                   | 12              | 18          | 8.4                    | 5               | 7           |
| E1BCE0           | DNAJC8      | Uncharacterized protein (Fragment)                                                                              | 30.722  | 6.5                    | 2               | 2           | 3.4                    | 1               | 2           |
| F1MTK0           | DNAJC9      | Uncharacterized protein (Fragment)                                                                              | 30.306  | 41.4                   | 10              | 23          | 19.5                   | 6               | 11          |

| Accession number | Gene symbol | Discription                                                                       | MW(kDa) | Biological Replicate 1 |                 |             | Biological Replicate 2 |                 |             |
|------------------|-------------|-----------------------------------------------------------------------------------|---------|------------------------|-----------------|-------------|------------------------|-----------------|-------------|
|                  |             |                                                                                   |         | Sequence coverage(%)   | Unique peptides | MS/MS count | Sequence coverage(%)   | Unique peptides | MS/MS count |
| P56541           | DNASE2      | Deoxyribonuclease-2-alpha                                                         | 40.282  | 18.6                   | 7               | 14          | 6.8                    | 4               | 9           |
| E1BGR3           | DNLZ        | Uncharacterized protein                                                           | 18.485  | 5.3                    | 1               | 1           | 5.3                    | 1               | 3           |
| Q2KIA5           | DNM1L       | Dynamin-1-like protein                                                            | 83.351  | 53                     | 35              | 95          | 24.2                   | 20              | 54          |
| E1BA62           | DNM3        | Uncharacterized protein                                                           | 58.805  | 12.3                   | 1               | 1           | #N/A                   | #N/A            | #N/A        |
| E1BIL8           | DNMBP       | Uncharacterized protein                                                           | 178.08  | 0.9                    | 1               | 2           | #N/A                   | #N/A            | #N/A        |
| Q24K09           | DNMT1       | DNA (cytosine-5)-methyltransferase                                                | 182.84  | 8.2                    | 12              | 13          | 1.7                    | 3               | 3           |
| Q2HJH1           | DNPEP       | Aspartyl aminopeptidase                                                           | 51.828  | 51                     | 16              | 49          | 18.3                   | 8               | 15          |
| E1BM28           | DNPH1       | 2-deoxynucleoside 5-phosphate N-hydrolase 1                                       | 18.373  | 20.6                   | 2               | 3           | #N/A                   | #N/A            | #N/A        |
| F1MJ73           | DOCK5       | Uncharacterized protein (Fragment)                                                | 210.71  | 8.5                    | 14              | 19          | 3.6                    | 7               | 8           |
| Q0VC53           | DOHH        | Deoxyhypusine hydroxylase                                                         | 33.26   | 6.3                    | 2               | 2           | #N/A                   | #N/A            | #N/A        |
| Q58CR4           | DOLK        | Dolichol kinase                                                                   | 59.189  | 4.1                    | 2               | 4           | #N/A                   | #N/A            | #N/A        |
| F1MW49           | DOLPP1      | Uncharacterized protein                                                           | 27.039  | 10.1                   | 2               | 2           | #N/A                   | #N/A            | #N/A        |
| Q59A29           | donson      | DONSON protein                                                                    | 62.237  | 4.1                    | 1               | 1           | #N/A                   | #N/A            | #N/A        |
| F1MPE2           | DOPEY1      | Uncharacterized protein                                                           | 276.41  | #N/A                   | #N/A            | #N/A        | 0.7                    | 2               | 2           |
| E1BAK4           | DOPEY2      | Uncharacterized protein                                                           | 255.55  | #N/A                   | #N/A            | #N/A        | 0.3                    | 1               | 2           |
| Q5EA65           | DPAGT1      | UDP-N-acetylglucosamine--dolichyl-phosphate N-acetylglucosaminephosphotransferase | 46.044  | 4.7                    | 2               | 4           | #N/A                   | #N/A            | #N/A        |
| Q5E982           | DPH5        | Diphthine synthase                                                                | 31.662  | 3.2                    | 1               | 1           | #N/A                   | #N/A            | #N/A        |
| F2Z4F5           | DPP3        | Uncharacterized protein                                                           | 82.031  | 18.6                   | 8               | 9           | 3.4                    | 3               | 3           |
| P81425           | DPP4        | Dipeptidyl peptidase 4                                                            | 88.368  | 8.1                    | 6               | 9           | 8.4                    | 7               | 12          |
| H9GW42           | DPP7        | Uncharacterized protein (Fragment)                                                | 35.813  | 3                      | 1               | 1           | #N/A                   | #N/A            | #N/A        |
| F1N1L4           | DPP8        | Uncharacterized protein                                                           | 103.35  | 23.1                   | 16              | 27          | 5.5                    | 5               | 7           |
| E1BI31           | DPP9        | Uncharacterized protein (Fragment)                                                | 98.93   | 10                     | 8               | 9           | 6.7                    | 6               | 8           |
| F1N3H6           | DPY19L1     | Uncharacterized protein                                                           | 84.603  | 5.1                    | 3               | 3           | #N/A                   | #N/A            | #N/A        |
| Q3MHP5           | DRG1        | Developmentally-regulated GTP-binding protein 1                                   | 40.542  | 27.8                   | 8               | 16          | 13.6                   | 5               | 8           |
| Q58D56           | DRG2        | Developmentally-regulated GTP-binding protein 2                                   | 40.749  | 9.1                    | 2               | 3           | #N/A                   | #N/A            | #N/A        |
| F1MTU0           | DSCC1       | Uncharacterized protein                                                           | 44.991  | 5.6                    | 2               | 2           | #N/A                   | #N/A            | #N/A        |
| E1BKT9           | DSP         | Uncharacterized protein                                                           | 332.38  | 2.1                    | 6               | 7           | 1                      | 3               | 4           |



| Accession number | Gene symbol | Discription                                                           | MW(kDa) | Biological Replicate 1 |                 |             | Biological Replicate 2 |                 |             |
|------------------|-------------|-----------------------------------------------------------------------|---------|------------------------|-----------------|-------------|------------------------|-----------------|-------------|
|                  |             |                                                                       |         | Sequence coverage(%)   | Unique peptides | MS/MS count | Sequence coverage(%)   | Unique peptides | MS/MS count |
| Q3T0V7           | EDF1        | Endothelial differentiation-related factor 1                          | 16.368  | #N/A                   | #N/A            | #N/A        | 16.9                   | 3               | 3           |
| E1BPX2           | EDIL3       | Uncharacterized protein                                               | 53.719  | 11.9                   | 6               | 8           | 7.7                    | 4               | 11          |
| F1MN61           | EEA1        | Uncharacterized protein (Fragment)                                    | 137.18  | 13.1                   | 14              | 17          | 14.5                   | 19              | 34          |
| P68103           | EEF1A1      | Elongation factor 1-alpha 1                                           | 50.14   | 53.2                   | 11              | 144         | 21.9                   | 13              | 125         |
| Q5E983           | EEF1B       | Elongation factor 1-beta                                              | 24.804  | 56.4                   | 10              | 39          | 40.9                   | 9               | 31          |
| A5D989           | EEF1D       | Elongation factor 1-delta                                             | 31.141  | 66.8                   | 14              | 46          | 42.1                   | 12              | 58          |
| Q3SZ15           | EEF1E1      | Eukaryotic translation elongation factor 1 epsilon 1                  | 19.756  | 17.2                   | 3               | 8           | #N/A                   | #N/A            | #N/A        |
| Q3SZV3           | EEF1G       | Elongation factor 1-gamma                                             | 50.377  | 69.8                   | 30              | 131         | 36.1                   | 21              | 71          |
| Q3SYU2           | EEF2        | Elongation factor 2                                                   | 95.367  | 66.2                   | 50              | 213         | 25.9                   | 22              | 67          |
| A3KN48           | EEFSEC      | EEFSEC protein                                                        | 63.632  | 19                     | 10              | 15          | 5.3                    | 3               | 4           |
| Q3MHJ7           | EEPD1       | Endonuclease/exonuclease/phosphatase family domain-containing protein | 62.786  | 2.3                    | 1               | 6           | #N/A                   | #N/A            | #N/A        |
| E1BCB9           | EFCAB12     | Uncharacterized protein                                               | 66.697  | 1.4                    | 1               | 1           | #N/A                   | #N/A            | #N/A        |
| G3X7C2           | EFCAB4A     | Uncharacterized protein (Fragment)                                    | 45.046  | #N/A                   | #N/A            | #N/A        | 3                      | 1               | 4           |
| A5D7A0           | EFHD2       | EF-hand domain-containing protein                                     | 26.918  | 43.8                   | 9               | 22          | 24.4                   | 5               | 11          |
| A6H7H9           | EFS         | EFS protein                                                           | 58.483  | 2                      | 1               | 1           | #N/A                   | #N/A            | #N/A        |
| E1BH79           | EFTUD1      | Uncharacterized protein                                               | 126.15  | 8.6                    | 7               | 9           | 2.1                    | 3               | 3           |
| F1N6D5           | EFTUD2      | 116 kDa U5 small nuclear ribonucleoprotein component                  | 109.44  | 12.7                   | 9               | 12          | 2.7                    | 2               | 2           |
| Q5E9R3           | EHD1        | EH domain-containing protein 1                                        | 60.681  | 41.8                   | 20              | 45          | 14.6                   | 8               | 20          |
| E1BJV0           | EHD4        | Uncharacterized protein                                               | 61.024  | 8.7                    | 2               | 3           | #N/A                   | #N/A            | #N/A        |
| Q08DE5           | EI24        | Etoposide-induced protein 2.4                                         | 38.921  | 7.9                    | 3               | 3           | 2.4                    | 1               | 2           |
| Q32LC3           | EIF1AX      | Eukaryotic translation initiation factor 1A, X-linked                 | 16.46   | 50.7                   | 7               | 28          | 35.4                   | 5               | 16          |
| Q32LJ9           | EIF1B       | Eukaryotic translation initiation factor 1B                           | 12.823  | 25.7                   | 2               | 2           | #N/A                   | #N/A            | #N/A        |
| F1MBF0           | EIF2A       | Eukaryotic translation initiation factor 2 subunit 1                  | 65.25   | 8.9                    | 6               | 7           | 2.6                    | 2               | 3           |
| Q0IIF2           | EIF2B1      | Translation initiation factor eIF-2B subunit alpha                    | 33.87   | #N/A                   | #N/A            | #N/A        | 6.2                    | 2               | 2           |



| Accession number | Gene symbol | Discription                                          | MW(kDa) | Biological Replicate 1 |                 |             | Biological Replicate 2 |                 |             |
|------------------|-------------|------------------------------------------------------|---------|------------------------|-----------------|-------------|------------------------|-----------------|-------------|
|                  |             |                                                      |         | Sequence coverage(%)   | Unique peptides | MS/MS count | Sequence coverage(%)   | Unique peptides | MS/MS count |
| Q5E9B4           | EIF2B2      | Translation initiation factor eIF-2B subunit beta    | 38.994  | 6.8                    | 3               | 3           | 5.7                    | 2               | 2           |
| A5PJ17           | EIF2B3      | Translation initiation factor eIF-2B subunit gamma   | 50.218  | 4                      | 2               | 2           | 5.8                    | 3               | 4           |
| Q3T058           | EIF2B4      | Translation initiation factor eIF-2B subunit delta   | 57.468  | 2.3                    | 1               | 1           | 5.5                    | 2               | 2           |
| E1BPB3           | EIF2B5      | Uncharacterized protein                              | 80.913  | 4.9                    | 4               | 6           | #N/A                   | #N/A            | #N/A        |
| P68102           | EIF2S1      | Eukaryotic translation initiation factor 2 subunit 1 | 36.108  | 32.4                   | 10              | 18          | 19.4                   | 7               | 9           |
| Q5E9D0           | EIF2S2      | Eukaryotic translation initiation factor 2 subunit 2 | 38.286  | 24.3                   | 8               | 14          | 13.5                   | 5               | 8           |
| Q2KHU8           | EIF2S3      | Eukaryotic translation initiation factor 2 subunit 3 | 51.065  | 31.6                   | 13              | 21          | 16.7                   | 9               | 20          |
| E1B7R4           | EIF3A       | Eukaryotic translation initiation factor 3 subunit A | 166.27  | 16.5                   | 23              | 38          | 10.4                   | 17              | 29          |
| A7MB16           | EIF3B       | Eukaryotic translation initiation factor 3 subunit B | 88.918  | 31.3                   | 19              | 38          | 13.6                   | 10              | 26          |
| Q3SYW6           | EIF3C       | Eukaryotic translation initiation factor 3 subunit C | 105.36  | 12.7                   | 14              | 19          | 11.7                   | 12              | 22          |
| Q3T122           | EIF3D       | Eukaryotic translation initiation factor 3 subunit D | 63.93   | 27.4                   | 9               | 12          | #N/A                   | #N/A            | #N/A        |
| Q3T102           | EIF3E       | Eukaryotic translation initiation factor 3 subunit E | 52.19   | 29.2                   | 12              | 15          | 15.3                   | 7               | 19          |
| E1BLZ8           | EIF3F       | Uncharacterized protein (Fragment)                   | 40.188  | 20.6                   | 7               | 15          | 11.5                   | 4               | 11          |
| Q56JZ5           | EIF3H       | Eukaryotic translation initiation factor 3 subunit H | 39.906  | 19.9                   | 5               | 9           | 13.9                   | 4               | 12          |
| Q5E966           | EIF3I       | Eukaryotic translation initiation factor 3 subunit I | 36.472  | 31.7                   | 9               | 17          | 26.8                   | 8               | 22          |
| Q0VCU8           | EIF3J       | Eukaryotic translation initiation factor 3 subunit J | 28.951  | 21.1                   | 6               | 9           | 15.6                   | 5               | 8           |
| Q3TOV3           | EIF3K       | Eukaryotic translation initiation factor 3 subunit K | 25.073  | 14.7                   | 3               | 5           | 9.6                    | 2               | 4           |

| Accession number | Gene symbol | Discription                                                     | MW(kDa) | Biological Replicate 1 |                 |             | Biological Replicate 2 |                 |             |
|------------------|-------------|-----------------------------------------------------------------|---------|------------------------|-----------------|-------------|------------------------|-----------------|-------------|
|                  |             |                                                                 |         | Sequence coverage(%)   | Unique peptides | MS/MS count | Sequence coverage(%)   | Unique peptides | MS/MS count |
| Q3ZCK1           | EIF3L       | Eukaryotic translation initiation factor 3 subunit L            | 66.726  | 23.2                   | 14              | 20          | 24.1                   | 13              | 21          |
| Q3T148           | EIF3M       | Eukaryotic translation initiation factor 3 subunit M            | 42.415  | 23.9                   | 8               | 13          | 8.8                    | 4               | 7           |
| Q3SZ54           | EIF4A1      | Eukaryotic initiation factor 4A-I                               | 46.153  | 58.1                   | 13              | 116         | 34                     | 7               | 60          |
| Q3SZ65           | EIF4A2      | Eukaryotic initiation factor 4A-II                              | 46.402  | 50.1                   | 10              | 20          | 26.3                   | 3               | 11          |
| Q2NL22           | EIF4A3      | Eukaryotic initiation factor 4A-III                             | 46.84   | 20.2                   | 6               | 6           | 12.9                   | 3               | 3           |
| F1MYS7           | EIF4B       | Uncharacterized protein                                         | 68.817  | 5.9                    | 4               | 4           | 9                      | 5               | 10          |
| Q9N0T5           | EIF4E       | Eukaryotic translation initiation factor 4E                     | 25.079  | 26.7                   | 6               | 12          | 18.4                   | 4               | 9           |
| F1N030           | EIF4E1B     | Uncharacterized protein (Fragment)                              | 26.302  | 36.1                   | 7               | 17          | 14.3                   | 3               | 12          |
| Q0I131           | EIF4E2      | Eukaryotic translation initiation factor 4E family member 2     | 27.192  | 5.9                    | 1               | 1           | #N/A                   | #N/A            | #N/A        |
| E1BG99           | EIF4ENIF1   | Uncharacterized protein                                         | 108.43  | 28.2                   | 22              | 53          | 17.8                   | 15              | 33          |
| F1MX04           | EIF4G1      | Uncharacterized protein (Fragment)                              | 178.59  | 2.2                    | 3               | 3           | 5                      | 7               | 7           |
| Q95L46           | EIF4G2      | Eukaryotic translation initiation factor 4 gamma 2              | 102.36  | 27.1                   | 23              | 34          | 8.9                    | 8               | 16          |
| F1N0F7           | EIF5        | Uncharacterized protein                                         | 48.971  | 17.5                   | 7               | 8           | 4.9                    | 2               | 2           |
| Q6EWQ7           | EIF5A       | Eukaryotic translation initiation factor 5A-1                   | 16.832  | 56.5                   | 10              | 36          | 20.8                   | 4               | 15          |
| F1N6Y7           | EIF5B       | Uncharacterized protein (Fragment)                              | 138.28  | 2                      | 2               | 2           | 0.8                    | 1               | 1           |
| Q9TU47           | EIF6        | Eukaryotic translation initiation                               | 26.513  | 38.4                   | 7               | 12          | 4.1                    | 1               | 3           |
| Q3ZCE2           | ELAVL1      | ELAV (Embryonic lethal, abnormal vision, Drosophila)-like 1 (Hu | 36.163  | 26.7                   | 8               | 11          | 15.6                   | 4               | 7           |
| G3N063           | ELAVL2      | Uncharacterized protein                                         | 42.545  | 13.7                   | 2               | 12          | 19.3                   | 2               | 12          |
| F1MUZ4           | ELMO2       | Engulfment and cell motility                                    | 82.545  | 14.7                   | 7               | 14          | 4.3                    | 4               | 7           |
| Q0IIE6           | ELMOD1      | ELMO domain-containing protein 1                                | 38.036  | #N/A                   | #N/A            | #N/A        | 1.8                    | 1               | 1           |
| Q08DZ3           | ELMOD2      | ELMO domain-containing protein 2                                | 34.83   | #N/A                   | #N/A            | #N/A        | 9.9                    | 3               | 3           |
| Q2TBH6           | ELP4        | Elongator complex protein 4                                     | 46.429  | 2.8                    | 1               | 1           | #N/A                   | #N/A            | #N/A        |
| E1BBT8           | EMC1        | Uncharacterized protein                                         | 111.82  | 7.1                    | 6               | 7           | 2.4                    | 3               | 5           |
| A1A4M2           | EMC10       | ER membrane protein complex subunit                             | 27.425  | #N/A                   | #N/A            | #N/A        | 3.1                    | 1               | 2           |
| Q5E993           | EMC2        | ER membrane protein complex subunit                             | 34.804  | 18.9                   | 5               | 6           | 10.1                   | 3               | 6           |

| Accession number | Gene symbol | Discription                                                    | MW(kDa) | Biological Replicate 1 |                 |             | Biological Replicate 2 |                 |             |
|------------------|-------------|----------------------------------------------------------------|---------|------------------------|-----------------|-------------|------------------------|-----------------|-------------|
|                  |             |                                                                |         | Sequence coverage(%)   | Unique peptides | MS/MS count | Sequence coverage(%)   | Unique peptides | MS/MS count |
| Q3ZCB8           | EMC3        | ER membrane protein complex subunit                            | 29.92   | 6.5                    | 1               | 1           | 5.4                    | 1               | 2           |
| Q3TOK8           | EMC4        | ER membrane protein complex subunit                            | 20.086  | 7.1                    | 1               | 1           | 13.7                   | 2               | 4           |
| Q32KL5           | EMC8        | ER membrane protein complex subunit                            | 23.777  | 10.5                   | 2               | 3           | 12.9                   | 3               | 7           |
| Q6XZP8           | EMD         | Emerin                                                         | 29.389  | 4.6                    | 1               | 1           | #N/A                   | #N/A            | #N/A        |
| F1MNZ8           | EMID1       | Uncharacterized protein                                        | 47.51   | #N/A                   | #N/A            | #N/A        | 4.1                    | 2               | 4           |
| F1N6P6           | EML1        | Uncharacterized protein                                        | 89.997  | 1.3                    | 1               | 1           | #N/A                   | #N/A            | #N/A        |
| E1BB08           | EML2        | Uncharacterized protein                                        | 89.144  | 20.8                   | 13              | 28          | 10                     | 8               | 15          |
| F1N1R8           | EML4        | Uncharacterized protein                                        | 110.36  | 15.6                   | 14              | 19          | 10.5                   | 9               | 15          |
| F1N214           | ENAH        | Uncharacterized protein                                        | 86.231  | 10.7                   | 8               | 11          | 10.2                   | 8               | 16          |
| A7YY77           | ENDOD1      | ENDOD1 protein                                                 | 54.868  | 14.6                   | 6               | 9           | 5.6                    | 2               | 2           |
| P38447           | ENDOG       | Endonuclease G, mitochondrial                                  | 32.261  | 5                      | 1               | 1           | #N/A                   | #N/A            | #N/A        |
| Q9XSJ4           | ENO1        | Alpha-enolase                                                  | 47.326  | 81.6                   | 25              | 114         | 44.7                   | 19              | 86          |
| Q3ZC09           | ENO3        | Beta-enolase                                                   | 47.095  | 33.2                   | 3               | 6           | #N/A                   | #N/A            | #N/A        |
| Q0VD27           | ENOPH1      | Enolase-phosphatase E1                                         | 28.929  | 18.4                   | 4               | 10          | 7.7                    | 2               | 3           |
| F1MNS5           | ENPP1       | Uncharacterized protein                                        | 104.39  | 18.3                   | 14              | 24          | 4                      | 4               | 14          |
| F1N5W4           | ENPP5       | Uncharacterized protein (Fragment)                             | 41.751  | 9.4                    | 3               | 10          | #N/A                   | #N/A            | #N/A        |
| E1BDB0           | EPB41L2     | Uncharacterized protein                                        | 111.84  | 37.7                   | 33              | 67          | 25.8                   | 18              | 59          |
| Q58CU2           | EPB41L5     | Band 4.1-like protein 5                                        | 57.168  | 10.6                   | 5               | 5           | #N/A                   | #N/A            | #N/A        |
| Q3TOL5           | EPCAM       | Epithelial cell adhesion molecule                              | 34.859  | 5.1                    | 1               | 2           | #N/A                   | #N/A            | #N/A        |
| A6QLI0           | EPDR1       | Mammalian ependymin-related protein                            | 26.485  | 4.7                    | 1               | 1           | #N/A                   | #N/A            | #N/A        |
| F1N579           | EPN1        | Uncharacterized protein                                        | 60.095  | 14.1                   | 4               | 12          | 3                      | 2               | 2           |
| F1N4F8           | EPN3        | Uncharacterized protein                                        | 64.97   | 4.8                    | 1               | 1           | #N/A                   | #N/A            | #N/A        |
| G3X6L9           | EPRS        | Uncharacterized protein                                        | 169.92  | 26.7                   | 38              | 68          | 13.2                   | 21              | 44          |
| A5D7I1           | EPS15       | EPS15 protein                                                  | 100.21  | 4.1                    | 3               | 4           | 4.3                    | 4               | 6           |
| A7MB30           | EPS15L1     | EPS15L1 protein                                                | 88.003  | 11.7                   | 8               | 8           | 11.7                   | 8               | 14          |
| G3X8H0           | EPSTI1      | Uncharacterized protein                                        | 27.951  | 11.6                   | 2               | 3           | #N/A                   | #N/A            | #N/A        |
| E1BPW2           | ERC1        | Uncharacterized protein                                        | 128.17  | 2.5                    | 3               | 3           | #N/A                   | #N/A            | #N/A        |
| E1BFL2           | ERCC6       | Uncharacterized protein                                        | 166.8   | #N/A                   | #N/A            | #N/A        | 0.7                    | 1               | 1           |
| F6QNX4           | ERGIC1      | Uncharacterized protein                                        | 32.585  | 19.3                   | 4               | 5           | 6.2                    | 2               | 6           |
| Q0I1J1           | ERGIC2      | ERGIC and golgi 2                                              | 42.613  | 18.6                   | 6               | 8           | 10.6                   | 4               | 6           |
| Q5EAE0           | ERGIC3      | Endoplasmic reticulum-Golgi intermediate compartment protein 3 | 43.374  | 10.4                   | 5               | 7           | 15.4                   | 7               | 21          |

| Accession number | Gene symbol | Discription                                                 | MW(kDa) | Biological Replicate 1 |                 |             | Biological Replicate 2 |                 |             |
|------------------|-------------|-------------------------------------------------------------|---------|------------------------|-----------------|-------------|------------------------|-----------------|-------------|
|                  |             |                                                             |         | Sequence coverage(%)   | Unique peptides | MS/MS count | Sequence coverage(%)   | Unique peptides | MS/MS count |
| F1ML00           | ERI3        | ERI1 exoribonuclease 3                                      | 18.185  | 10                     | 2               | 3           | 5.6                    | 1               | 1           |
| F1MGK3           | ERLEC1      | Uncharacterized protein                                     | 48.806  | 20.5                   | 7               | 13          | 10.7                   | 4               | 8           |
| G3NOU8           | ERLIN1      | Uncharacterized protein                                     | 39.067  | 37.6                   | 10              | 16          | 22.1                   | 5               | 15          |
| Q1RMU4           | ERLIN2      | Erlin-2                                                     | 37.73   | 61.5                   | 17              | 72          | 32.8                   | 9               | 53          |
| F1MI95           | ERMP1       | Uncharacterized protein (Fragment)                          | 98.637  | 24.4                   | 18              | 37          | 13.8                   | 12              | 36          |
| A5PJN2           | ERO1L       | ERO1-like protein alpha                                     | 54.296  | 21.6                   | 9               | 14          | 13.5                   | 6               | 14          |
| F1MW08           | ERO1LB      | Uncharacterized protein                                     | 53.724  | 4                      | 1               | 1           | #N/A                   | #N/A            | #N/A        |
| P81623           | ERP29       | Endoplasmic reticulum resident                              | 28.806  | 55.8                   | 13              | 64          | 37.6                   | 10              | 37          |
| Q3TOL2           | ERP44       | Endoplasmic reticulum resident                              | 46.836  | 25.1                   | 10              | 25          | 14.5                   | 7               | 19          |
| Q3TOU3           | ES1         | Esl protein                                                 | 28.699  | 73.4                   | 14              | 60          | 35                     | 9               | 50          |
| Q08E20           | ESD         | S-formylglutathione hydrolase                               | 31.548  | 63.1                   | 14              | 41          | 18.4                   | 5               | 14          |
| F1MW01           | ESPL1       | Uncharacterized protein                                     | 230.94  | 3.6                    | 6               | 6           | #N/A                   | #N/A            | #N/A        |
| F1MVN3           | ESRP1       | Uncharacterized protein                                     | 74.933  | 8.7                    | 4               | 6           | 10.5                   | 7               | 10          |
| F1MN29           | ESYT2       | Uncharacterized protein (Fragment)                          | 97.22   | 13.9                   | 11              | 14          | 7.3                    | 6               | 15          |
| Q0VCX5           | ETF1        | Eukaryotic peptide chain release factor subunit 1           | 49.03   | 18.1                   | 7               | 18          | 6.9                    | 3               | 4           |
| F1MWR3           | ETFFA       | Electron transfer flavoprotein subunit alpha, mitochondrial | 34.957  | 49.5                   | 14              | 43          | 46.2                   | 13              | 75          |
| Q2TBV3           | ETFB        | Electron transfer flavoprotein subunit beta                 | 27.699  | 59.2                   | 17              | 54          | 58.4                   | 14              | 60          |
| Q2KIG0           | ETFDH       | Electron transfer flavoprotein-ubiquinone oxidoreductase,   | 68.611  | 35                     | 19              | 34          | 24.3                   | 14              | 47          |
| Q3T094           | ETHE1       | Persulfide dioxygenase ETHE1, mitochondrial                 | 27.9    | 26.8                   | 5               | 6           | 13                     | 3               | 5           |
| F1MQT2           | ETV6        | Transcription factor ETV6                                   | 46.851  | 5.8                    | 3               | 5           | #N/A                   | #N/A            | #N/A        |
| A2VDX7           | EX05        | Exonuclease V                                               | 41.511  | 2.7                    | 1               | 3           | #N/A                   | #N/A            | #N/A        |
| F1MC63           | EXOC1       | Uncharacterized protein                                     | 102.85  | #N/A                   | #N/A            | #N/A        | 3.2                    | 3               | 4           |
| E1BDW9           | EXOC2       | Uncharacterized protein                                     | 103.34  | 0.9                    | 1               | 1           | #N/A                   | #N/A            | #N/A        |
| Q0V8C2           | EXOC3       | Exocyst complex component 3                                 | 85.58   | 6.2                    | 4               | 5           | 1.2                    | 1               | 1           |
| A6QLD1           | EXOC4       | EXOC4 protein                                               | 110.48  | 2.2                    | 2               | 2           | 5.2                    | 5               | 6           |
| E1BAZ9           | EXOG        | Uncharacterized protein                                     | 41.076  | 55.2                   | 14              | 42          | 31.8                   | 9               | 20          |
| P31976           | EZR         | Ezrin                                                       | 68.759  | 70.9                   | 39              | 250         | 48.9                   | 27              | 181         |

| Accession number | Gene symbol | Discription                                                   | MW(kDa) | Biological Replicate 1 |                 |             | Biological Replicate 2 |                 |             |
|------------------|-------------|---------------------------------------------------------------|---------|------------------------|-----------------|-------------|------------------------|-----------------|-------------|
|                  |             |                                                               |         | Sequence coverage(%)   | Unique peptides | MS/MS count | Sequence coverage(%)   | Unique peptides | MS/MS count |
| P00743           | F10         | Coagulation factor X                                          | 54.51   | #N/A                   | #N/A            | #N/A        | 1.8                    | 1               | 3           |
| Q9XT56           | F11R        | Junctional adhesion molecule A                                | 32.455  | 7.7                    | 2               | 2           | 2.7                    | 1               | 2           |
| F1MBC5           | F9          | Coagulation factor IX                                         | 36.365  | 6.2                    | 2               | 3           | #N/A                   | #N/A            | #N/A        |
| P10790           | FABP3       | Fatty acid-binding protein, heart                             | 14.779  | 61.7                   | 10              | 45          | 46.6                   | 8               | 30          |
| P55052           | FABP5       | Fatty acid-binding protein,                                   | 15.074  | 74.8                   | 13              | 54          | 54.8                   | 8               | 25          |
| Q645M6           | FADD        | Protein FADD                                                  | 23.002  | 17.2                   | 3               | 4           | 6.7                    | 1               | 2           |
| Q29RM7           | FAF1        | Fas (TNFRSF6) associated factor 1                             | 73.868  | #N/A                   | #N/A            | #N/A        | 1.7                    | 1               | 2           |
| Q2HJD0           | FAF2        | FAS-associated factor 2                                       | 52.663  | 16.6                   | 6               | 10          | #N/A                   | #N/A            | #N/A        |
| Q2HJ98           | FAHD1       | Acylpyruvase FAHD1, mitochondrial                             | 24.499  | 29.9                   | 5               | 9           | 9.5                    | 2               | 10          |
| Q2KIB0           | FAHD2       | Fumarylacetoacetate hydrolase domain-containing protein 2     | 34.556  | 33.8                   | 9               | 28          | 24.8                   | 7               | 16          |
| Q2KI00           | FAM107B     | Protein FAM107B                                               | 15.586  | 6.1                    | 1               | 1           | #N/A                   | #N/A            | #N/A        |
| Q2T9N1           | FAM114A1    | Protein FAM114A2                                              | 54.824  | 41.2                   | 18              | 44          | 22.2                   | 11              | 24          |
| A6QNT4           | FAM120B     | Constitutive coactivator of peroxisome proliferator-activated | 79.075  | 1.4                    | 1               | 1           | #N/A                   | #N/A            | #N/A        |
| F1N2F1           | FAM129A     | Uncharacterized protein                                       | 103.57  | 7.4                    | 6               | 9           | 5.7                    | 5               | 7           |
| F1MD34           | FAM129B     | Uncharacterized protein (Fragment)                            | 84.038  | 22.1                   | 15              | 25          | 6.1                    | 5               | 11          |
| F1MUR7           | FAM134A     | Uncharacterized protein                                       | 57.647  | 4.6                    | 1               | 1           | 1.7                    | 1               | 2           |
| E1BBW7           | FAM134C     | Uncharacterized protein                                       | 51.303  | 9.9                    | 4               | 6           | #N/A                   | #N/A            | #N/A        |
| Q2HJI3           | FAM136A     | Protein FAM136A                                               | 15.683  | 5.8                    | 1               | 1           | 5.8                    | 1               | 2           |
| F1MLL5           | FAM160A2    | FTS and Hook-interacting protein (Fragment)                   | 85.637  | 2.4                    | 3               | 4           | #N/A                   | #N/A            | #N/A        |
| F1N3S2           | FAM162A     | Protein FAM162A (Fragment)                                    | 16.582  | 25.5                   | 5               | 14          | 7.6                    | 1               | 3           |
| E1BM49           | FAM187B     | Uncharacterized protein                                       | 41.94   | #N/A                   | #N/A            | #N/A        | 2.5                    | 1               | 1           |
| Q0IIH8           | FAM188A     | Protein FAM188A                                               | 49.678  | 16.2                   | 6               | 9           | 4.9                    | 2               | 2           |
| F1MW97           | FAM203A     | Uncharacterized protein (Fragment)                            | 43.575  | 2.5                    | 1               | 1           | #N/A                   | #N/A            | #N/A        |
| Q05B67           | FAM210A     | Protein FAM210A                                               | 31.025  | 10.3                   | 2               | 2           | 13.9                   | 4               | 5           |
| Q3ZBK2           | FAM213A     | Redox-regulatory protein FAM213A                              | 24.355  | 50.9                   | 13              | 31          | 37.6                   | 11              | 35          |
| F1MTG3           | FAM21A      | Uncharacterized protein                                       | 145.5   | 9.4                    | 9               | 16          | 4.4                    | 5               | 10          |
| A5PKI3           | FAM3C       | Protein FAM3C                                                 | 24.796  | 11.9                   | 3               | 4           | 18.9                   | 5               | 10          |
| I6L9J8           | FAM45A      | FAM45A protein                                                | 27.841  | 21.5                   | 5               | 6           | 10.2                   | 3               | 5           |
| E1BAJ4           | FAM47ESTBD1 | Uncharacterized protein                                       | 36.556  | 17.4                   | 6               | 10          | 19.5                   | 6               | 14          |

| Accession number | Gene symbol | Discription                                                         | MW(kDa) | Biological Replicate 1 |                 |             | Biological Replicate 2 |                 |             |
|------------------|-------------|---------------------------------------------------------------------|---------|------------------------|-----------------|-------------|------------------------|-----------------|-------------|
|                  |             |                                                                     |         | Sequence coverage(%)   | Unique peptides | MS/MS count | Sequence coverage(%)   | Unique peptides | MS/MS count |
| Q2KJI3           | FAM49B      | Protein FAM49B                                                      | 36.748  | 28.1                   | 7               | 11          | 2.5                    | 1               | 1           |
| A0JN43           | FAM62A      | Family with sequence similarity 62 (C2 domain containing), member A | 123.03  | 36                     | 33              | 79          | 16.6                   | 17              | 41          |
| A2VE72           | FAM8A1      | Family with sequence similarity 8, member A1                        | 44.283  | 6.2                    | 2               | 2           | 3.3                    | 1               | 2           |
| F1N0S9           | FAM98A      | Uncharacterized protein                                             | 55.12   | 11.8                   | 5               | 8           | 3.1                    | 2               | 2           |
| E1BJ38           | FAM98C      | Uncharacterized protein                                             | 38.275  | 3.7                    | 1               | 3           | #N/A                   | #N/A            | #N/A        |
| F1MFC6           | FARP1       | Uncharacterized protein                                             | 118.35  | 5.9                    | 7               | 8           | 3.3                    | 4               | 5           |
| A7MBD4           | FARSA       | FARSA protein                                                       | 57.494  | 26.6                   | 11              | 21          | 10.4                   | 6               | 15          |
| A8E4P2           | FARSB       | FARSB protein                                                       | 66.339  | 32.6                   | 18              | 41          | 16.8                   | 9               | 26          |
| F1N647           | FASN        | Fatty acid synthase                                                 | 274.26  | 0.6                    | 1               | 1           | 0.9                    | 3               | 4           |
| F1N1T6           | FASTKD2     | Uncharacterized protein                                             | 78.216  | 4.9                    | 3               | 7           | 3.6                    | 3               | 7           |
| F1MM59           | FBL         | Uncharacterized protein                                             | 33.962  | 5.6                    | 2               | 2           | #N/A                   | #N/A            | #N/A        |
| Q3SZB7           | FBP1        | Fructose-1,6-bisphosphatase 1                                       | 36.728  | 11.5                   | 3               | 3           | 2.1                    | 1               | 1           |
| Q58DG6           | FBXL20      | F-box/LRR-repeat protein 20                                         | 48.423  | #N/A                   | #N/A            | #N/A        | 4.4                    | 2               | 3           |
| Q0VD31           | FBXL4       | F-box/LRR-repeat protein 4                                          | 70.294  | 1.1                    | 1               | 2           | #N/A                   | #N/A            | #N/A        |
| F1MSC9           | FBX010      | Uncharacterized protein                                             | 104.22  | 2.4                    | 2               | 2           | 3.2                    | 3               | 4           |
| E1BAY5           | FBX030      | Uncharacterized protein                                             | 82.375  | 19.9                   | 14              | 23          | 8.6                    | 6               | 8           |
| G5E639           | FBX045      | Uncharacterized protein (Fragment)                                  | 30.673  | 8                      | 2               | 2           | 7                      | 2               | 3           |
| Q3SX24           | FBX06       | F-box only protein 6                                                | 30.767  | 13.6                   | 4               | 5           | 7.2                    | 2               | 3           |
| Q2T9S7           | FBX07       | F-box only protein 7                                                | 57.965  | 4.2                    | 2               | 3           | 3.4                    | 2               | 2           |
| F1MLG0           | FBXW11      | Uncharacterized protein                                             | 61      | 55.7                   | 31              | 71          | 33.6                   | 9               | 54          |
| F1MNN4           | FBXW7       | Uncharacterized protein                                             | 70.319  | 2.6                    | 2               | 2           | 2.9                    | 2               | 2           |
| Q8WMY2           | FDPS        | Farnesyl pyrophosphate synthase                                     | 40.51   | 27.2                   | 3               | 26          | 24.1                   | 7               | 21          |
| F1N3J0           | FDX1        | Adrenodoxin, mitochondrial                                          | 18.057  | 5.5                    | 1               | 1           | 11                     | 2               | 4           |
| Q05B51           | FDX1L       | Adrenodoxin-like protein,                                           | 19.946  | #N/A                   | #N/A            | #N/A        | 5.9                    | 1               | 4           |
| G3N2Y7           | FDXR        | NADPH:adrenodoxin oxidoreductase, mitochondrial                     | 55.035  | 31.3                   | 0               | 1           | 22.3                   | 0               | 20          |
| P22600           | FECH        | Ferrochelatase, mitochondrial                                       | 46.934  | 36.8                   | 12              | 22          | 17.3                   | 7               | 11          |
| Q58DH8           | FEN1        | Flap endonuclease 1                                                 | 42.509  | 11.8                   | 3               | 3           | #N/A                   | #N/A            | #N/A        |
| E1BNE0           | FER         | Tyrosine-protein kinase                                             | 94.754  | 4.3                    | 3               | 5           | 2.3                    | 2               | 3           |
| A7MB21           | FERMT2      | FERMT2 protein                                                      | 77.873  | 3.1                    | 2               | 2           | #N/A                   | #N/A            | #N/A        |

| Accession number | Gene symbol | Discription                                                                | MW(kDa) | Biological Replicate 1 |                 |             | Biological Replicate 2 |                 |             |
|------------------|-------------|----------------------------------------------------------------------------|---------|------------------------|-----------------|-------------|------------------------|-----------------|-------------|
|                  |             |                                                                            |         | Sequence coverage(%)   | Unique peptides | MS/MS count | Sequence coverage(%)   | Unique peptides | MS/MS count |
| F1N1J5           | FGFR10P     | FGFR1 oncogene partner (Fragment)                                          | 39.333  | #N/A                   | #N/A            | #N/A        | 3.5                    | 1               | 3           |
| Q148D3           | FH          | Fumarate hydratase                                                         | 54.69   | 69                     | 30              | 156         | 40.6                   | 21              | 147         |
| Q1KZG4           | FHIT        | Bis(5-adenosyl)-triphosphatase                                             | 16.951  | 73.2                   | 11              | 38          | 28.9                   | 5               | 16          |
| G3MZ95           | FHL1        | Uncharacterized protein                                                    | 31.91   | 15.4                   | 4               | 4           | #N/A                   | #N/A            | #N/A        |
| Q2YDE0           | FIBP        | Fibroblast growth factor (Acidic) intracellular binding protein            | 41.157  | 9.2                    | 3               | 3           | #N/A                   | #N/A            | #N/A        |
| E1BIRO           | FICD        | Uncharacterized protein                                                    | 51.771  | #N/A                   | #N/A            | #N/A        | 1.7                    | 1               | 3           |
| E1BKM0           | FIP1L1      | Uncharacterized protein                                                    | 67.471  | #N/A                   | #N/A            | #N/A        | 4.7                    | 2               | 3           |
| Q3T0I5           | FIS1        | Mitochondrial fission 1 protein                                            | 16.937  | 40.8                   | 6               | 10          | 21.1                   | 3               | 8           |
| F1MNV8           | FKBP15      | Peptidyl-prolyl cis-trans isomerase                                        | 130.85  | 12.6                   | 12              | 23          | 13                     | 14              | 21          |
| P18203           | FKBP1A      | Peptidyl-prolyl cis-trans isomerase                                        | 11.909  | 25                     | 2               | 6           | 25                     | 2               | 4           |
| Q32PA9           | FKBP2       | Peptidyl-prolyl cis-trans isomerase                                        | 15.404  | 53.6                   | 6               | 15          | #N/A                   | #N/A            | #N/A        |
| P26884           | FKBP3       | Peptidyl-prolyl cis-trans isomerase                                        | 25.191  | 13.4                   | 3               | 4           | 3.6                    | 1               | 1           |
| Q9TRY0           | FKBP4       | Peptidyl-prolyl cis-trans isomerase                                        | 51.529  | 57.3                   | 26              | 83          | 29.8                   | 15              | 49          |
| G3MXV0           | FKBP5       | Uncharacterized protein                                                    | 51.12   | #N/A                   | #N/A            | #N/A        | 2.2                    | 1               | 1           |
| F1N2P6           | FKBP8       | Uncharacterized protein                                                    | 44.359  | 30.9                   | 11              | 22          | 23.6                   | 9               | 18          |
| Q2KJC8           | FKBP9       | Peptidyl-prolyl cis-trans isomerase                                        | 63.534  | 1.7                    | 1               | 1           | 3.1                    | 2               | 2           |
| F6R6Q1           | FLAD1       | Uncharacterized protein                                                    | 54.272  | 56.1                   | 22              | 36          | 11.6                   | 6               | 13          |
| Q3B7L5           | FLCN        | Folliculin                                                                 | 64.203  | 1.6                    | 1               | 1           | #N/A                   | #N/A            | #N/A        |
| F1N365           | FLII        | Uncharacterized protein (Fragment)                                         | 144.23  | 5.1                    | 6               | 9           | 2.9                    | 4               | 5           |
| E1BKX7           | FLNB        | Uncharacterized protein                                                    | 281.61  | #N/A                   | #N/A            | #N/A        | 2.8                    | 6               | 11          |
| E1BE25           | FLNC        | Uncharacterized protein                                                    | 290.78  | 3.4                    | 6               | 7           | 2.1                    | 4               | 6           |
| Q08DN8           | FLOT1       | Flotillin-1                                                                | 47.353  | 26.7                   | 9               | 16          | 10.8                   | 5               | 8           |
| G3X6T9           | FLOT2       | Flotillin-2 (Fragment)                                                     | 42.327  | 31.4                   | 10              | 12          | 21                     | 8               | 15          |
| E1B718           | FMNL3       | Uncharacterized protein                                                    | 111.13  | 4.9                    | 1               | 1           | #N/A                   | #N/A            | #N/A        |
| F1MXQ7           | FMR1        | Uncharacterized protein                                                    | 71.187  | 34.8                   | 15              | 36          | 15                     | 7               | 26          |
| Q0P592           | FN3KRP      | Fructosamine 3 kinase related                                              | 34.414  | 21                     | 7               | 13          | 13.3                   | 4               | 7           |
| F1MSM9           | FNBP1L      | Uncharacterized protein (Fragment)                                         | 63.709  | 2.6                    | 2               | 3           | 3.7                    | 2               | 4           |
| P29702           | FNTA        | Protein farnesyltransferase/geranylgeranyltransferase type-1 subunit alpha | 43.845  | 15.5                   | 5               | 5           | #N/A                   | #N/A            | #N/A        |
| P49355           | FNTB        | Protein farnesyltransferase subunit                                        | 48.767  | 3.7                    | 2               | 4           | #N/A                   | #N/A            | #N/A        |

| Accession number | Gene symbol | Discription                                                | MW(kDa) | Biological Replicate 1 |                 |             | Biological Replicate 2 |                 |             |
|------------------|-------------|------------------------------------------------------------|---------|------------------------|-----------------|-------------|------------------------|-----------------|-------------|
|                  |             |                                                            |         | Sequence coverage(%)   | Unique peptides | MS/MS count | Sequence coverage(%)   | Unique peptides | MS/MS count |
| F1MQ56           | FOCAD       | Uncharacterized protein                                    | 201.16  | 0.4                    | 1               | 1           | #N/A                   | #N/A            | #N/A        |
| Q1RMQ1           | FRG1        | FSHD region gene 1                                         | 29.157  | 8.9                    | 2               | 2           | #N/A                   | #N/A            | #N/A        |
| Q95117           | FRZB        | Secreted frizzled-related protein 3                        | 36.234  | 2.5                    | 1               | 2           | 8.3                    | 3               | 7           |
| Q3MHK9           | FSCN1       | Fascin                                                     | 54.785  | 3.7                    | 2               | 2           | #N/A                   | #N/A            | #N/A        |
| Q05B84           | FSD1        | Fibronectin type III and SPRY domain-containing protein 1  | 55.719  | 27.6                   | 13              | 24          | 11.5                   | 6               | 9           |
| F1MAU6           | FSD1L       | Uncharacterized protein                                    | 55.807  | 4.2                    | 2               | 2           | #N/A                   | #N/A            | #N/A        |
| O46415           | FTL         | Ferritin light chain                                       | 19.987  | 61.7                   | 8               | 22          | 51.4                   | 8               | 65          |
| F1MX51           | FUBP1       | Uncharacterized protein (Fragment)                         | 63.697  | 6                      | 3               | 5           | 5.1                    | 3               | 4           |
| Q2KIMO           | FUCA1       | Tissue alpha-L-fucosidase                                  | 54.088  | 12.4                   | 6               | 11          | 11.3                   | 6               | 12          |
| A6QP44           | FUK         | FUK protein                                                | 116.95  | 41.3                   | 39              | 125         | 17.4                   | 21              | 74          |
| Q8MJN0           | FUNDC2      | FUN14 domain-containing protein 2                          | 20.577  | 22.6                   | 5               | 10          | 11.6                   | 2               | 4           |
| Q28009           | FUS         | RNA-binding protein FUS                                    | 52.31   | 2.7                    | 1               | 2           | #N/A                   | #N/A            | #N/A        |
| Q3ZBU5           | FUSIP1      | FUS interacting protein (Serine/arginine-rich) 1           | 22.121  | 6                      | 1               | 1           | #N/A                   | #N/A            | #N/A        |
| Q05B87           | FXN         | Frataxin, mitochondrial                                    | 23.566  | #N/A                   | #N/A            | #N/A        | 10.6                   | 2               | 2           |
| E1B9L5           | FXR2        | Uncharacterized protein (Fragment)                         | 71.61   | 21.1                   | 8               | 21          | 8.5                    | 3               | 4           |
| Q32LC7           | G3BP        | Ras GTPase-activating protein-binding protein 1            | 52.121  | 11.8                   | 5               | 6           | 6.7                    | 2               | 7           |
| Q2KJ17           | G3BP2       | GTPase activating protein (SH3 domain) binding protein 2   | 50.681  | 12.7                   | 5               | 10          | 9.4                    | 3               | 5           |
| F1MMK2           | G6PD        | Glucose-6-phosphate 1-dehydrogenase                        | 59.336  | 72.4                   | 32              | 125         | 34.4                   | 18              | 55          |
| Q9MYM4           | GAA         | Lysosomal alpha-glucosidase                                | 104.76  | 27.3                   | 21              | 45          | 8.6                    | 7               | 16          |
| P60519           | GABARAPL2   | Gamma-aminobutyric acid receptor-associated protein-like 2 | 13.667  | 40.2                   | 6               | 9           | 23.1                   | 4               | 7           |
| F1MIB2           | GAK         | Uncharacterized protein                                    | 138.09  | 14.1                   | 15              | 26          | 6.2                    | 8               | 16          |
| G1K1R6           | GALK1       | Galactokinase                                              | 42.242  | 53.1                   | 20              | 50          | 21.9                   | 7               | 32          |
| F1MFK7           | GALK2       | Uncharacterized protein                                    | 49.191  | 14.3                   | 7               | 11          | 5.6                    | 3               | 3           |
| F1MU84           | GALNS       | Uncharacterized protein (Fragment)                         | 58.578  | 9.9                    | 5               | 13          | #N/A                   | #N/A            | #N/A        |
| G3X6R0           | GALNT12     | Uncharacterized protein (Fragment)                         | 54.38   | 4.5                    | 2               | 2           | 3.2                    | 2               | 2           |
| E1BB48           | GALNT2      | Uncharacterized protein                                    | 64.757  | 28                     | 14              | 21          | 15.4                   | 10              | 16          |
| Q58CX1           | GALT        | Galactose-1-phosphate                                      | 41.287  | 16.7                   | 4               | 5           | #N/A                   | #N/A            | #N/A        |



| Accession number | Gene symbol | Discription                                                    | MW(kDa) | Biological Replicate 1 |                 |             | Biological Replicate 2 |                 |             |
|------------------|-------------|----------------------------------------------------------------|---------|------------------------|-----------------|-------------|------------------------|-----------------|-------------|
|                  |             |                                                                |         | Sequence coverage(%)   | Unique peptides | MS/MS count | Sequence coverage(%)   | Unique peptides | MS/MS count |
| A6H7J3           | GAN         | GAN protein                                                    | 67.602  | 24.5                   | 13              | 18          | 5.4                    | 3               | 5           |
| F1N6Y1           | GANAB       | Uncharacterized protein                                        | 109.47  | 51.3                   | 41              | 199         | 28.7                   | 25              | 117         |
| P10096           | GAPDH       | Glyceraldehyde-3-phosphate                                     | 35.868  | 80.2                   | 24              | 446         | 57.4                   | 18              | 325         |
| Q2KJE5           | GAPDHS      | Glyceraldehyde-3-phosphate dehydrogenase, testis-specific      | 43.287  | 13.2                   | 2               | 7           | #N/A                   | #N/A            | #N/A        |
| A5D794           | GAPVD1      | GTPase-activating protein and VPS9 domain-containing protein 1 | 157.37  | 3.4                    | 4               | 6           | 1                      | 2               | 3           |
| A5D7A2           | GARS        | GARS protein                                                   | 83.117  | 41.3                   | 25              | 60          | 17.5                   | 13              | 34          |
| Q59A32           | GART        | Trifunctional purine biosynthetic protein adenosine-3          | 107.91  | 34.6                   | 31              | 63          | 15.7                   | 14              | 31          |
| F1N308           | GATSL2      | Uncharacterized protein (Fragment)                             | 36.116  | 10.9                   | 2               | 6           | #N/A                   | #N/A            | #N/A        |
| Q0V8A3           | GATSL3      | GATS-like protein 3                                            | 36.041  | 16.4                   | 5               | 12          | 12.8                   | 3               | 6           |
| Q2KHZ8           | GBA         | Glucosylceramidase                                             | 59.854  | 28.2                   | 10              | 14          | 13.2                   | 6               | 11          |
| Q3SWX4           | GBAS        | Glioblastoma amplified sequence                                | 33.419  | 35                     | 15              | 46          | 24.5                   | 12              | 40          |
| F1MZP0           | GBE1        | Uncharacterized protein (Fragment)                             | 75.793  | 20                     | 13              | 16          | 2.6                    | 2               | 3           |
| F1N7I6           | GCA         | Uncharacterized protein                                        | 22.29   | 12.9                   | 2               | 2           | #N/A                   | #N/A            | #N/A        |
| Q0P5L8           | GCAT        | 2-amino-3-ketobutyrate coenzyme A ligase, mitochondrial        | 45.165  | 43.9                   | 15              | 91          | 16.5                   | 8               | 31          |
| E1BJZ4           | GCC1        | Uncharacterized protein                                        | 87.602  | 2.5                    | 2               | 2           | 2.1                    | 2               | 4           |
| E1BB16           | GCC2        | Uncharacterized protein                                        | 195.46  | #N/A                   | #N/A            | #N/A        | 0.8                    | 1               | 1           |
| Q2KHZ9           | GCDH        | Glutaryl-CoA dehydrogenase,                                    | 48.471  | 21.9                   | 7               | 14          | 3.7                    | 2               | 2           |
| Q32S38           | GCLC        | Glutamate-cysteine ligase catalytic subunit                    | 69.022  | 49.6                   | 26              | 89          | 26.3                   | 14              | 42          |
| Q2T9Y6           | GCLM        | Glutamate--cysteine ligase regulatory subunit                  | 30.533  | 36.1                   | 8               | 21          | 10.2                   | 3               | 7           |
| P20821           | GCSH        | Glycine cleavage system H protein, mitochondrial               | 18.791  | 17.9                   | 2               | 4           | #N/A                   | #N/A            | #N/A        |
| F1MLX9           | GDA         | Graves disease carrier protein                                 | 51.059  | 39.2                   | 16              | 39          | 22                     | 10              | 19          |
| A6QQZ0           | GDAP1       | Ganglioside-induced differentiation-associated protein         | 41.201  | 10.1                   | 4               | 7           | 10.6                   | 5               | 6           |
| Q2KIX2           | GDAP2       | Ganglioside-induced differentiation-associated protein         | 56.262  | 37.4                   | 16              | 24          | 18.7                   | 10              | 19          |

| Accession number | Gene symbol | Discription                                    | MW(kDa) | Biological Replicate 1 |                 |             | Biological Replicate 2 |                 |             |
|------------------|-------------|------------------------------------------------|---------|------------------------|-----------------|-------------|------------------------|-----------------|-------------|
|                  |             |                                                |         | Sequence coverage(%)   | Unique peptides | MS/MS count | Sequence coverage(%)   | Unique peptides | MS/MS count |
| Q3T0T0           | GDE1        | Glycerophosphodiester                          | 37.653  | 26.9                   | 9               | 22          | 7.6                    | 2               | 4           |
| F1MKJ7           | GDF3        | Uncharacterized protein                        | 40.662  | 19.5                   | 7               | 33          | 4.9                    | 2               | 7           |
| Q9GK68           | GDF9        | Growth/differentiation factor 9                | 51.932  | 42.2                   | 17              | 65          | 30.9                   | 13              | 63          |
| P21856           | GDI1        | Rab GDP dissociation inhibitor                 | 50.565  | 69.4                   | 19              | 64          | 29.5                   | 7               | 24          |
| P50397           | GDI2        | Rab GDP dissociation inhibitor beta            | 50.488  | 73.9                   | 21              | 112         | 34.4                   | 9               | 41          |
| F1N2J0           | GDPD1       | Uncharacterized protein                        | 33.537  | 5.5                    | 1               | 1           | 5.2                    | 2               | 2           |
| Q5E9T1           | GDPGP1      | GDP-D-glucose phosphorylase 1                  | 42.332  | 14                     | 3               | 3           | #N/A                   | #N/A            | #N/A        |
| F1MAW0           | GEMIN4      | Uncharacterized protein (Fragment)             | 120.41  | 1.7                    | 2               | 2           | 2.7                    | 3               | 4           |
| E1BJG3           | GEMIN5      | Uncharacterized protein                        | 168.8   | 1.2                    | 2               | 3           | 1.1                    | 2               | 3           |
| E1BEJ3           | GFM1        | Uncharacterized protein                        | 83.842  | 21.8                   | 15              | 18          | 3                      | 3               | 4           |
| A6QNM2           | GFM2        | Ribosome-releasing factor 2,                   | 86.03   | 14.3                   | 10              | 18          | 5.8                    | 6               | 8           |
| F1MZY2           | GFPT1       | Uncharacterized protein (Fragment)             | 63.502  | 61.4                   | 29              | 121         | 27.4                   | 14              | 39          |
| F6RN30           | GGA1        | Uncharacterized protein                        | 69.738  | 7.3                    | 3               | 5           | 2.7                    | 2               | 4           |
| F1MKY0           | GGA2        | Uncharacterized protein (Fragment)             | 65.965  | 7.2                    | 3               | 3           | #N/A                   | #N/A            | #N/A        |
| G5E690           | GGA3        | Uncharacterized protein                        | 62.246  | 3.3                    | 1               | 1           | #N/A                   | #N/A            | #N/A        |
| Q32LE4           | GGCT        | Gamma-glutamylcyclotransferase                 | 21.177  | 5.3                    | 1               | 1           | #N/A                   | #N/A            | #N/A        |
| A7YWG4           | GGH         | Gamma-glutamyl hydrolase                       | 35.683  | 15.1                   | 5               | 11          | 8.5                    | 3               | 9           |
| P56966           | GGPS1       | Geranylgeranyl pyrophosphate                   | 34.9    | 32                     | 9               | 29          | 13.3                   | 4               | 15          |
| F1MRP0           | GHDC        | Uncharacterized protein                        | 57.621  | 19.1                   | 8               | 11          | 15.7                   | 7               | 21          |
| Q3SZK3           | GHITM       | Growth hormone inducible transmembrane protein | 37.029  | 5.8                    | 2               | 2           | 2.9                    | 1               | 4           |
| F1MBG6           | GIT1        | Uncharacterized protein                        | 83.936  | 14.6                   | 8               | 12          | 8.3                    | 7               | 14          |
| E1BI41           | GIT2        | Uncharacterized protein                        | 84.728  | 5.9                    | 4               | 5           | 3.4                    | 3               | 5           |
| P18246           | GJA1        | Gap junction alpha-1 protein                   | 43.187  | 8.6                    | 3               | 4           | 12.8                   | 4               | 5           |
| A4IFL1           | GJA4        | Gap junction alpha-4 protein                   | 37.499  | 19.5                   | 6               | 12          | 11.4                   | 4               | 6           |
| E1B725           | GLA         | Uncharacterized protein                        | 49.795  | 16.9                   | 5               | 6           | 13.7                   | 5               | 6           |
| O18756           | GLCE        | D-glucuronyl C5-epimerase                      | 69.984  | 23.2                   | 14              | 20          | 10.2                   | 7               | 15          |
| E1BJQ1           | GLDC        | Uncharacterized protein                        | 112.89  | 7.9                    | 6               | 7           | 5.5                    | 6               | 9           |
| E1BDY3           | GLG1        | Uncharacterized protein                        | 134.63  | 6.8                    | 9               | 12          | 7.6                    | 11              | 17          |
| E1BA27           | GLMN        | Uncharacterized protein                        | 67.689  | 37.5                   | 20              | 47          | 15.9                   | 9               | 18          |
| A4FUZ1           | GL01        | GL01 protein                                   | 20.765  | 59.8                   | 11              | 44          | 22.3                   | 4               | 10          |
| E1BBM1           | GLOD4       | Uncharacterized protein                        | 33.23   | 33.6                   | 11              | 29          | 22.5                   | 7               | 20          |



| Accession number | Gene symbol | Discription                                                        | MW(kDa) | Biological Replicate 1 |                 |             | Biological Replicate 2 |                 |             |
|------------------|-------------|--------------------------------------------------------------------|---------|------------------------|-----------------|-------------|------------------------|-----------------|-------------|
|                  |             |                                                                    |         | Sequence coverage(%)   | Unique peptides | MS/MS count | Sequence coverage(%)   | Unique peptides | MS/MS count |
| P63243           | GNB2L1      | Guanine nucleotide-binding protein subunit beta-2-like 1           | 35.076  | 65                     | 16              | 36          | 27.8                   | 8               | 22          |
| Q28024           | GNG12       | Guanine nucleotide-binding protein G(I)/G(S)/G(O) subunit gamma-12 | 8.0572  | 23.6                   | 1               | 2           | #N/A                   | #N/A            | #N/A        |
| F1MWB9           | GNL1        | Uncharacterized protein                                            | 54.815  | 23.5                   | 11              | 23          | 7.9                    | 4               | 5           |
| F1N1S9           | GNMT        | Glycine N-methyltransferase                                        | 32.879  | 10.8                   | 2               | 3           | #N/A                   | #N/A            | #N/A        |
| A4IF87           | GNPAT       | Dihydroxyacetone phosphate                                         | 77.663  | 29.3                   | 19              | 31          | 10.4                   | 8               | 11          |
| Q17QL1           | GNPDA2      | Glucosamine-6-phosphate isomerase 2                                | 31.164  | 85.1                   | 16              | 57          | 18.8                   | 5               | 5           |
| Q1LZH9           | GNS         | N-acetylglucosamine-6-sulfatase                                    | 62.775  | 29.1                   | 14              | 44          | 16.4                   | 9               | 45          |
| E1BLT0           | GOLGA2      | Uncharacterized protein                                            | 113.17  | 3.6                    | 3               | 4           | 2.1                    | 2               | 4           |
| E1B970           | GOLGA3      | Uncharacterized protein                                            | 167.46  | 6.9                    | 8               | 9           | 9.2                    | 13              | 18          |
| E1B7E3           | GOLGA4      | Uncharacterized protein                                            | 259.18  | #N/A                   | #N/A            | #N/A        | 0.7                    | 2               | 3           |
| A5D7A5           | GOLGA5      | GOLGA5 protein                                                     | 82.678  | 3.4                    | 2               | 7           | #N/A                   | #N/A            | #N/A        |
| G3N3R5           | GOLIM4      | Uncharacterized protein                                            | 77.472  | 11.8                   | 9               | 11          | 8.3                    | 6               | 14          |
| E1BLA8           | GOLM1       | Uncharacterized protein                                            | 45.536  | 4.2                    | 2               | 2           | 11.6                   | 5               | 7           |
| Q1RMW9           | GOLPH3      | Golgi phosphoprotein 3 (Coat-                                      | 33.725  | 15.8                   | 4               | 5           | 5                      | 2               | 3           |
| E1BAX1           | GOPC        | Uncharacterized protein                                            | 51.02   | 18.9                   | 7               | 12          | 12.5                   | 6               | 7           |
| F1MSB5           | GORASP2     | Uncharacterized protein                                            | 47.577  | 18.7                   | 5               | 16          | 4.4                    | 2               | 5           |
| G5E571           | GOSR1       | Golgi SNAP receptor complex member 1 (Fragment)                    | 27.919  | 20.5                   | 6               | 11          | 12.7                   | 4               | 9           |
| F1N652           | GOSR2       | Golgi SNAP receptor complex member                                 | 24.677  | #N/A                   | #N/A            | #N/A        | 5.2                    | 1               | 3           |
| P33097           | GOT1        | Aspartate aminotransferase,                                        | 46.398  | 59.1                   | 24              | 51          | 31.5                   | 12              | 28          |
| P12344           | GOT2        | Aspartate aminotransferase,                                        | 47.513  | 67.2                   | 31              | 160         | 41.6                   | 23              | 108         |
| Q58CZ3           | GPAA1       | Anchor attachment protein 1                                        | 61.988  | 10                     | 6               | 6           | 6.3                    | 4               | 7           |
| F1MCX1           | GPC4        | Uncharacterized protein (Fragment)                                 | 56.92   | 6.9                    | 3               | 5           | 6.9                    | 3               | 6           |
| A6QQR7           | GPD1L       | GPD1L protein                                                      | 38.238  | 11.1                   | 4               | 4           | 10                     | 4               | 5           |
| E1BN14           | GPKOW       | Uncharacterized protein                                            | 53.443  | 3.3                    | 1               | 3           | #N/A                   | #N/A            | #N/A        |
| P80109           | GPLD1       | Phosphatidylinositol-glycan-specific phospholipase D               | 92.601  | #N/A                   | #N/A            | #N/A        | 1.1                    | 1               | 2           |
| A6H7F2           | GPN2        | GPN-loop GTPase 2                                                  | 34.464  | 5.2                    | 1               | 1           | #N/A                   | #N/A            | #N/A        |
| F1MT29           | GPR107      | Uncharacterized protein                                            | 62.335  | 1.8                    | 1               | 2           | 2.7                    | 2               | 3           |
| E1B9D3           | GPR179      | Uncharacterized protein                                            | 255.4   | 0.4                    | 1               | 2           | 0.4                    | 1               | 10          |

| Accession number | Gene symbol | Discription                                   | MW(kDa) | Biological Replicate 1 |                 |             | Biological Replicate 2 |                 |             |
|------------------|-------------|-----------------------------------------------|---------|------------------------|-----------------|-------------|------------------------|-----------------|-------------|
|                  |             |                                               |         | Sequence coverage(%)   | Unique peptides | MS/MS count | Sequence coverage(%)   | Unique peptides | MS/MS count |
| F1N5D2           | GPR180      | Uncharacterized protein                       | 49.301  | #N/A                   | #N/A            | #N/A        | 2                      | 1               | 1           |
| F1MP10           | GPS1        | Uncharacterized protein (Fragment)            | 54.15   | 34.5                   | 14              | 29          | 12.8                   | 6               | 13          |
| E1BF40           | GPT2        | Uncharacterized protein                       | 58.027  | 5                      | 2               | 3           | 3.6                    | 2               | 3           |
| P00435           | GPX1        | Glutathione peroxidase 1                      | 22.659  | 60                     | 11              | 240         | 33.7                   | 7               | 16          |
| G3X8D7           | GPX3        | Glutathione peroxidase                        | 25.341  | 10.7                   | 2               | 3           | #N/A                   | #N/A            | #N/A        |
| Q2NL01           | GPX8        | Probable glutathione peroxidase 8             | 23.983  | 39.7                   | 6               | 10          | 26.8                   | 6               | 25          |
| Q3TOF9           | GRB2        | Growth factor receptor-bound                  | 25.206  | #N/A                   | #N/A            | #N/A        | 11.1                   | 3               | 4           |
| F1MB84           | GRHPR       | Uncharacterized protein                       | 35.769  | 57.9                   | 19              | 79          | 20.1                   | 9               | 33          |
| E1BPP9           | GRIPAP1     | Uncharacterized protein                       | 96.233  | 3.1                    | 2               | 2           | #N/A                   | #N/A            | #N/A        |
| Q3SZC1           | GRPEL1      | GrpE protein homolog 1,                       | 24.306  | 44.2                   | 9               | 19          | 34.6                   | 9               | 15          |
| Q0P5N5           | GRPEL2      | GrpE protein homolog 2,                       | 25.119  | #N/A                   | #N/A            | #N/A        | 11.2                   | 3               | 5           |
| F6Q087           | GSPT1       | G1 to S phase transition 1                    | 66.015  | 33.4                   | 16              | 28          | 12.9                   | 9               | 19          |
| E1BKZ1           | GSR         | Uncharacterized protein (Fragment)            | 46.238  | 65.7                   | 24              | 98          | 36.2                   | 15              | 63          |
| Q5EAC2           | GSS         | Glutathione synthetase                        | 52.065  | 19.4                   | 8               | 16          | 3.4                    | 2               | 3           |
| Q28035           | GSTA1       | Glutathione S-transferase A1                  | 25.451  | 7.7                    | 2               | 2           | #N/A                   | #N/A            | #N/A        |
| F1MX44           | GSTA5       | Glutathione S-transferase                     | 25.368  | #N/A                   | #N/A            | #N/A        | 7.7                    | 2               | 4           |
| F1MRG0           | GSTK1       | Uncharacterized protein                       | 25.666  | 3.5                    | 1               | 2           | #N/A                   | #N/A            | #N/A        |
| Q9NOV4           | GSTM1       | Glutathione S-transferase Mu 1                | 25.635  | 46.3                   | 1               | 15          | #N/A                   | #N/A            | #N/A        |
| F6Q751           | GSTM2       | Uncharacterized protein                       | 25.656  | 46.3                   | 2               | 4           | 25.2                   | 3               | 32          |
| F1MUX6           | GSTM3       | Uncharacterized protein (Fragment)            | 25.067  | 84.7                   | 24              | 671         | 78                     | 18              | 196         |
| P28801           | GSTP1       | Glutathione S-transferase P                   | 23.613  | 85.2                   | 13              | 109         | 30.5                   | 6               | 44          |
| F1MSE9           | GTF2A1L     | Uncharacterized protein                       | 42.904  | 22.9                   | 7               | 10          | #N/A                   | #N/A            | #N/A        |
| Q32L01           | GTF2A2      | Transcription initiation factor IIA subunit 2 | 12.457  | 14.7                   | 2               | 2           | 14.7                   | 2               | 3           |
| A6QLI8           | GTF2E1      | General transcription factor IIE              | 49.21   | 6.2                    | 3               | 5           | #N/A                   | #N/A            | #N/A        |
| Q2KJF9           | GTF2E2      | General transcription factor IIE              | 32.731  | 5.5                    | 2               | 3           | #N/A                   | #N/A            | #N/A        |
| F1MY8            | GTF3C5      | Uncharacterized protein                       | 60.076  | 5.2                    | 2               | 2           | #N/A                   | #N/A            | #N/A        |
| Q3MHG6           | GTPBP10     | GTP-binding protein 10                        | 42.931  | 18.1                   | 6               | 8           | 4.7                    | 2               | 2           |
| A6QLJ3           | GUF1        | Translation factor GUF1,                      | 74.765  | 4.2                    | 2               | 3           | 2.8                    | 2               | 3           |
| P46195           | GUK1        | Guanylate kinase                              | 21.91   | 36.9                   | 6               | 13          | 9.6                    | 2               | 3           |
| A3KMY8           | GUSB        | GUSB protein                                  | 74.469  | 38.7                   | 23              | 61          | 13.2                   | 11              | 26          |
| E1BHD8           | GXYLT1      | Uncharacterized protein                       | 50.689  | 6.6                    | 3               | 6           | 3                      | 1               | 1           |

| Accession number | Gene symbol | Discription                                                    | MW(kDa) | Biological Replicate 1 |                 |             | Biological Replicate 2 |                 |             |
|------------------|-------------|----------------------------------------------------------------|---------|------------------------|-----------------|-------------|------------------------|-----------------|-------------|
|                  |             |                                                                |         | Sequence coverage(%)   | Unique peptides | MS/MS count | Sequence coverage(%)   | Unique peptides | MS/MS count |
| F6QLM5           | GYG1        | Uncharacterized protein (Fragment)                             | 37.298  | 36                     | 10              | 27          | 11.2                   | 4               | 11          |
| F6QC58           | GYPC        | Uncharacterized protein                                        | 9.9012  | #N/A                   | #N/A            | #N/A        | 10                     | 1               | 1           |
| A7MB78           | GYS1        | Glycogen [starch] synthase, muscle                             | 83.813  | 8                      | 5               | 7           | 4.1                    | 3               | 7           |
| Q3HNG7           | H1FOO       | Histone H1oo                                                   | 35.435  | 23.9                   | 9               | 20          | 14.6                   | 5               | 12          |
| Q17QG8           | H2AFX       | Histone H2A                                                    | 15.128  | 17.5                   | 3               | 6           | 17.5                   | 3               | 7           |
| Q32S29           | H2B         | Histone H2B                                                    | 13.926  | 46.8                   | 4               | 10          | 34.1                   | 1               | 13          |
| Q5E9F8           | H3F3A;H3F3B | Histone H3.3                                                   | 15.328  | 31.6                   | 2               | 11          | 17.6                   | 2               | 12          |
| A2VDN1           | HABP4       | Hyaluronan binding protein 4                                   | 46.017  | 9.4                    | 3               | 4           | 1.9                    | 1               | 2           |
| H9GW30           | HACE1       | E3 ubiquitin-protein ligase HACE1                              | 100.98  | 6.3                    | 5               | 5           | 4.2                    | 4               | 9           |
| F1MVP8           | HACL1       | Uncharacterized protein                                        | 63.577  | 16.9                   | 7               | 11          | 9.8                    | 6               | 9           |
| F1N338           | HADH        | Uncharacterized protein                                        | 34.39   | 42.4                   | 15              | 41          | 17.2                   | 7               | 19          |
| Q3SZ00           | HADHA       | HADHA protein                                                  | 83.248  | 49.1                   | 32              | 116         | 27.4                   | 20              | 101         |
| O46629           | HADHB       | Trifunctional enzyme subunit beta, mitochondrial               | 51.345  | 63.8                   | 25              | 92          | 25.3                   | 13              | 70          |
| F6QLF1           | HAPLN3      | Uncharacterized protein                                        | 41.127  | 28.9                   | 10              | 27          | 21.4                   | 8               | 29          |
| Q2KI84           | HARS        | Histidine--tRNA ligase, cytoplasmic                            | 57.285  | 33.2                   | 10              | 21          | 18.1                   | 5               | 19          |
| F1NOT6           | HARS2       | Probable histidine--tRNA ligase, mitochondrial                 | 56.88   | 11.5                   | 2               | 4           | #N/A                   | #N/A            | #N/A        |
| Q58DR1           | HAT1        | Histone acetyltransferase 1                                    | 48.836  | 34.6                   | 11              | 16          | 6.3                    | 2               | 4           |
| E1BG87           | HAUS6       | Uncharacterized protein                                        | 107.72  | #N/A                   | #N/A            | #N/A        | 1.2                    | 1               | 2           |
| Q2KIE2           | HAX1        | HCLS1-associated protein X-1                                   | 31.415  | 3.2                    | 1               | 1           | #N/A                   | #N/A            | #N/A        |
| Q2KHZ2           | HBS1L       | HBS1-like protein                                              | 75.849  | 21.9                   | 13              | 18          | 6.6                    | 6               | 8           |
| Q0VD49           | HDAC10      | Histone deacetylase 10                                         | 71.492  | 1.8                    | 1               | 2           | #N/A                   | #N/A            | #N/A        |
| F1MQP3           | HDAC6       | Uncharacterized protein                                        | 123.82  | 2.3                    | 2               | 3           | #N/A                   | #N/A            | #N/A        |
| Q2KJ86           | HDHD1A      | Haloacid dehalogenase-like hydrolase domain containing 1A      | 25.298  | 26.8                   | 4               | 4           | #N/A                   | #N/A            | #N/A        |
| Q3ZCH9           | HDHD2       | Haloacid dehalogenase-like hydrolase domain-containing protein | 28.594  | 57.1                   | 10              | 36          | 7.7                    | 2               | 6           |
| F1MT25           | HDLBP       | Uncharacterized protein                                        | 139.59  | 6.8                    | 8               | 9           | 4.9                    | 6               | 9           |
| G3N314           | HEATR2      | Uncharacterized protein (Fragment)                             | 92.048  | 4.3                    | 2               | 2           | #N/A                   | #N/A            | #N/A        |
| E1BHR5           | HEATR6      | Uncharacterized protein (Fragment)                             | 130.08  | 2.1                    | 2               | 2           | #N/A                   | #N/A            | #N/A        |
| Q148C9           | HEBP1       | Heme-binding protein 1                                         | 21.23   | 44.5                   | 6               | 9           | 26.7                   | 5               | 7           |

| Accession number | Gene symbol | Discription                                                  | MW(kDa) | Biological Replicate 1 |                 |             | Biological Replicate 2 |                 |             |
|------------------|-------------|--------------------------------------------------------------|---------|------------------------|-----------------|-------------|------------------------|-----------------|-------------|
|                  |             |                                                              |         | Sequence coverage(%)   | Unique peptides | MS/MS count | Sequence coverage(%)   | Unique peptides | MS/MS count |
| E1BLD1           | HECTD1      | Uncharacterized protein                                      | 289.34  | #N/A                   | #N/A            | #N/A        | 0.3                    | 1               | 1           |
| E1BCV0           | HELLS       | Uncharacterized protein                                      | 94.816  | 2.5                    | 2               | 2           | #N/A                   | #N/A            | #N/A        |
| E1BAV2           | HERC4       | Uncharacterized protein                                      | 118.59  | 6.5                    | 6               | 6           | 1.1                    | 1               | 1           |
| Q0V8R6           | HEXA        | Beta-hexosaminidase subunit alpha                            | 60.352  | 20                     | 10              | 19          | 4.2                    | 3               | 8           |
| H7BWW2           | HEXB        | Beta-hexosaminidase                                          | 61.261  | 3.5                    | 2               | 3           | #N/A                   | #N/A            | #N/A        |
| Q0V8S0           | HGS         | Hepatocyte growth factor-regulated tyrosine kinase substrate | 85.785  | 1.9                    | 2               | 4           | 3.9                    | 4               | 5           |
| F1MF45           | HGSNAT      | Uncharacterized protein (Fragment)                           | 66.076  | 6.8                    | 4               | 7           | 6.4                    | 4               | 8           |
| Q2HJD7           | HIBADH      | 3-hydroxyisobutyrate dehydrogenase, mitochondrial            | 35.41   | 47.9                   | 13              | 74          | 31.2                   | 7               | 28          |
| Q2HJ73           | HIBCH       | 3-hydroxyisobutyryl-CoA hydrolase, mitochondrial             | 43.349  | 40.9                   | 16              | 63          | 16.6                   | 8               | 29          |
| Q0II23           | HICE1       | HEC1/NDC80 interacting, centrosome associated 1              | 34.728  | 3.9                    | 1               | 1           | #N/A                   | #N/A            | #N/A        |
| F1MG82           | HIF1AN      | Uncharacterized protein                                      | 40.361  | 10                     | 2               | 6           | #N/A                   | #N/A            | #N/A        |
| Q05AT5           | HIGD2A      | HIG1 domain family, member 2A                                | 11.575  | 23.6                   | 1               | 2           | #N/A                   | #N/A            | #N/A        |
| P62958           | HINT1       | Histidine triad nucleotide-binding protein 1                 | 13.779  | 78.6                   | 6               | 14          | 17.5                   | 2               | 8           |
| Q8SQ21           | HINT2       | Histidine triad nucleotide-binding protein 2, mitochondrial  | 17.147  | 47.2                   | 5               | 10          | 28.8                   | 4               | 11          |
| F1MWF0           | HIP1        | Uncharacterized protein                                      | 116.49  | 11.8                   | 11              | 14          | 4                      | 3               | 5           |
| F1MUI0           | HIP1R       | Uncharacterized protein (Fragment)                           | 120.34  | 5.3                    | 6               | 7           | 6.5                    | 7               | 10          |
| Q5W5U3           | HK1         | Hexokinase 1                                                 | 102.21  | 21.2                   | 22              | 37          | 16.7                   | 13              | 25          |
| E1BME6           | HK2         | Uncharacterized protein (Fragment)                           | 102.08  | #N/A                   | #N/A            | #N/A        | 3.5                    | 1               | 2           |
| F1MYW7           | HM13        | Uncharacterized protein                                      | 41.552  | 14.6                   | 4               | 18          | 7.4                    | 3               | 4           |
| Q2KIN5           | HMBS        | Porphobilinogen deaminase                                    | 39.515  | 4.7                    | 2               | 2           | 6.1                    | 2               | 2           |
| P10103           | HMGB1       | High mobility group protein B1                               | 24.908  | 12.6                   | 1               | 1           | #N/A                   | #N/A            | #N/A        |
| P40673           | HMGB2       | High mobility group protein B2                               | 24.033  | 16.3                   | 2               | 6           | #N/A                   | #N/A            | #N/A        |
| Q32L31           | HMGB3       | High mobility group protein B3                               | 22.896  | #N/A                   | #N/A            | #N/A        | 18                     | 3               | 5           |
| Q29448           | HMGCL       | Hydroxymethylglutaryl-CoA lyase, mitochondrial               | 34.168  | 30.5                   | 8               | 18          | 9.5                    | 4               | 10          |
| F6RJG0           | HMGCS1      | Uncharacterized protein (Fragment)                           | 62.517  | 20.4                   | 10              | 17          | 10.8                   | 6               | 15          |

| Accession number | Gene symbol | Discription                                         | MW(kDa) | Biological Replicate 1 |                 |             | Biological Replicate 2 |                 |             |
|------------------|-------------|-----------------------------------------------------|---------|------------------------|-----------------|-------------|------------------------|-----------------|-------------|
|                  |             |                                                     |         | Sequence coverage(%)   | Unique peptides | MS/MS count | Sequence coverage(%)   | Unique peptides | MS/MS count |
| F1MTY9           | HMOX2       | Heme oxygenase (Decycling) 2                        | 37.555  | 45.2                   | 13              | 27          | 17.1                   | 6               | 11          |
| P09867           | HNRNPA1     | Heterogeneous nuclear                               | 34.196  | 18.4                   | 4               | 6           | #N/A                   | #N/A            | #N/A        |
| Q2HJ60           | HNRNPA2B1   | Heterogeneous nuclear ribonucleoproteins A2/B1      | 36.006  | 25.5                   | 7               | 11          | 19.4                   | 6               | 9           |
| E1BEG2           | HNRNPA3     | Uncharacterized protein                             | 39.65   | 20.5                   | 6               | 11          | #N/A                   | #N/A            | #N/A        |
| Q3ZC44           | HNRNPAB     | Heterogeneous nuclear ribonucleoprotein A/B         | 30.653  | 10.5                   | 3               | 7           | #N/A                   | #N/A            | #N/A        |
| Q5E9J1           | HNRNPF      | Heterogeneous nuclear                               | 45.688  | 44.9                   | 10              | 25          | 14.3                   | 4               | 12          |
| E1BF20           | HNRNPH1     | Uncharacterized protein                             | 51.25   | 13.8                   | 1               | 4           | 5.7                    | 1               | 6           |
| Q3SZF3           | HNRNPH2     | Heterogeneous nuclear                               | 49.264  | 13.6                   | 2               | 2           | #N/A                   | #N/A            | #N/A        |
| E1BB17           | HNRNPH3     | Uncharacterized protein                             | 36.926  | 18.8                   | 4               | 5           | 8.4                    | 2               | 2           |
| Q3TOD0           | HNRNPK      | Heterogeneous nuclear                               | 51.019  | 22.4                   | 8               | 11          | 19.4                   | 9               | 20          |
| E1BIB4           | HNRNPL      | Uncharacterized protein                             | 64.075  | 13.8                   | 8               | 12          | 6.5                    | 4               | 8           |
| F1MY44           | HNRNPM      | Uncharacterized protein                             | 77.482  | 12.7                   | 8               | 12          | 5.1                    | 4               | 5           |
| A3KMV6           | HNRNPR      | HNRNPR protein                                      | 70.955  | 10.3                   | 2               | 4           | #N/A                   | #N/A            | #N/A        |
| F1MFT4           | HNRNPU      | Uncharacterized protein (Fragment)                  | 77.551  | 8.3                    | 6               | 13          | 4.3                    | 4               | 7           |
| Q3SX47           | HNRPC       | Heterogeneous nuclear ribonucleoprotein C (C1/C2)   | 32.427  | 18.4                   | 6               | 8           | 6.8                    | 2               | 4           |
| A5D9H5           | HNRPD       | Heterogeneous nuclear                               | 32.848  | 24.8                   | 7               | 10          | 7.8                    | 2               | 5           |
| E1BAT1           | HOOK1       | Uncharacterized protein                             | 84.822  | 1.2                    | 1               | 1           | 3.4                    | 3               | 6           |
| E1BI15           | HOOK2       | Uncharacterized protein                             | 82.877  | #N/A                   | #N/A            | #N/A        | 1.8                    | 1               | 2           |
| E1B7Q0           | HOOK3       | Protein Hook homolog 3                              | 83.145  | 15.5                   | 10              | 16          | 6.5                    | 4               | 6           |
| Q2TBU0           | HP          | Haptoglobin                                         | 44.859  | 3.5                    | 1               | 1           | #N/A                   | #N/A            | #N/A        |
| Q4PL64           | HPCA        | Neuron-specific calcium-binding protein hippocalcin | 22.427  | 4.1                    | 1               | 1           | #N/A                   | #N/A            | #N/A        |
| Q3SZ18           | HPRT1       | Hypoxanthine-guanine phosphoribosyltransferase      | 24.498  | 45                     | 7               | 13          | 17.4                   | 3               | 4           |
| G3MXH2           | HRAS        | Uncharacterized protein                             | 21.272  | 18.5                   | 3               | 4           | #N/A                   | #N/A            | #N/A        |
| Q5E949           | HRMT1L2     | HMT1 hnRNP methyltransferase-like 2 isoform 3       | 40.548  | 26.9                   | 10              | 16          | 9.3                    | 3               | 6           |
| Q3T114           | HRSP12      | Ribonuclease UK114                                  | 14.272  | 56.2                   | 6               | 12          | 15.3                   | 2               | 6           |
| F1MLK9           | HSCB        | Uncharacterized protein                             | 27.026  | 12.8                   | 4               | 4           | #N/A                   | #N/A            | #N/A        |



| Accession number | Gene symbol | Discription                                                        | MW(kDa) | Biological Replicate 1 |                 |             | Biological Replicate 2 |                 |             |
|------------------|-------------|--------------------------------------------------------------------|---------|------------------------|-----------------|-------------|------------------------|-----------------|-------------|
|                  |             |                                                                    |         | Sequence coverage(%)   | Unique peptides | MS/MS count | Sequence coverage(%)   | Unique peptides | MS/MS count |
| F1N3U0           | HSD11B2     | Corticosteroid 11-beta-dehydrogenase isozyme 2                     | 43.992  | 37.1                   | 11              | 44          | 20                     | 7               | 37          |
| Q1JQD0           | HSD17B1     | Hydroxysteroid (17-beta)                                           | 33.974  | 10.7                   | 4               | 6           | 22.4                   | 6               | 13          |
| O02691           | HSD17B10    | 3-hydroxyacyl-CoA dehydrogenase                                    | 27.14   | 64.8                   | 13              | 44          | 28.7                   | 6               | 24          |
| Q5E9H7           | HSD17B12    | Estradiol 17-beta-dehydrogenase 12                                 | 34.495  | 9.6                    | 1               | 2           | 4.8                    | 1               | 5           |
| Q0IIL6           | HSD17B4     | Hydroxysteroid (17-beta)                                           | 79.557  | 39.9                   | 25              | 55          | 23.6                   | 15              | 46          |
| A4FUD2           | HSD17B7     | HSD17B7 protein                                                    | 37.66   | #N/A                   | #N/A            | #N/A        | 3.3                    | 1               | 4           |
| A5PJF6           | HSDL1       | Inactive hydroxysteroid dehydrogenase-like protein 1               | 37.013  | 39.1                   | 11              | 28          | 16.1                   | 5               | 12          |
| F1MF48           | HSDL2       | Hydroxysteroid dehydrogenase-like protein 2 (Fragment)             | 45.232  | 14.1                   | 5               | 5           | 6                      | 3               | 5           |
| Q76LV2           | HSP90AA1    | Heat shock protein HSP 90-alpha                                    | 84.73   | 69.2                   | 43              | 692         | 43.7                   | 27              | 397         |
| Q76LV1           | HSP90AB1    | Heat shock protein HSP 90-beta                                     | 83.252  | 56.8                   | 26              | 100         | 38                     | 14              | 102         |
| Q95M18           | HSP90B1     | Endoplasmin                                                        | 92.426  | 65.3                   | 60              | 507         | 44.8                   | 39              | 248         |
| Q2YDD0           | HSPA14      | Heat shock 70 kDa protein 14                                       | 54.929  | 2.4                    | 1               | 1           | #N/A                   | #N/A            | #N/A        |
| Q27975           | HSPA1A      | Heat shock 70 kDa protein 1A                                       | 70.258  | #N/A                   | #N/A            | #N/A        | 43.7                   | 16              | 188         |
| Q27965           | HSPA1B      | Heat shock 70 kDa protein 1B                                       | 70.228  | 66                     | 23              | 216         | #N/A                   | #N/A            | #N/A        |
| POCB32           | HSPA1L      | Heat shock 70 kDa protein 1-like                                   | 70.388  | #N/A                   | #N/A            | #N/A        | 25.9                   | 1               | 1           |
| P34933           | HSPA2       | Heat shock-related 70 kDa protein 2                                | 69.739  | 52.7                   | 17              | 81          | 45.4                   | 17              | 82          |
| E1BBY7           | HSPA4       | Uncharacterized protein                                            | 94.508  | 60.1                   | 46              | 184         | 38.9                   | 29              | 102         |
| E1BBT9           | HSPA4L      | Uncharacterized protein (Fragment)                                 | 97.591  | 54                     | 42              | 110         | 29.8                   | 22              | 55          |
| Q0VCX2           | HSPA5       | 78 kDa glucose-regulated protein                                   | 72.399  | 62.3                   | 47              | 418         | 55.6                   | 40              | 422         |
| F1MWU9           | HSPA6       | Uncharacterized protein                                            | 70.955  | 17.4                   | 2               | 27          | 19.3                   | 3               | 22          |
| P19120           | HSPA8       | Heat shock cognate 71 kDa protein                                  | 71.24   | 60.9                   | 31              | 341         | 56                     | 26              | 353         |
| Q3ZCH0           | HSPA9       | Stress-70 protein, mitochondrial                                   | 73.741  | 56.4                   | 38              | 126         | 42.7                   | 29              | 129         |
| Q3T149           | HSPB1       | Heat shock protein beta-1                                          | 22.393  | 54.2                   | 8               | 18          | 50.7                   | 9               | 27          |
| Q2KJ77           | HSPBP1      | HSPA (Heat shock 70kDa) binding protein, cytoplasmic cochaperone 1 | 39.219  | 56.6                   | 15              | 59          | 11.2                   | 4               | 11          |
| F1MUZ9           | HSPD1       | 60 kDa heat shock protein,                                         | 60.977  | 68.8                   | 39              | 207         | 45                     | 28              | 128         |
| P61603           | HSPE1       | 10 kDa heat shock protein,                                         | 10.932  | 70.6                   | 9               | 31          | 57.8                   | 7               | 24          |
| Q0IIM3           | HSPH1       | Heat shock protein 105 kDa                                         | 96.725  | 57.2                   | 37              | 123         | 29.9                   | 22              | 73          |
| Q3SX02           | HTATIP2     | HIV-1 Tat interactive protein 2,                                   | 27.132  | 73.6                   | 19              | 41          | 44.6                   | 12              | 50          |

| Accession number | Gene symbol | Discription                                                 | MW(kDa) | Biological Replicate 1 |                 |             | Biological Replicate 2 |                 |             |
|------------------|-------------|-------------------------------------------------------------|---------|------------------------|-----------------|-------------|------------------------|-----------------|-------------|
|                  |             |                                                             |         | Sequence coverage(%)   | Unique peptides | MS/MS count | Sequence coverage(%)   | Unique peptides | MS/MS count |
| G3N370           | HTATSF1     | Uncharacterized protein                                     | 86.103  | 2.5                    | 2               | 2           | #N/A                   | #N/A            | #N/A        |
| F1N152           | HTRA1       | Serine protease HTRA1                                       | 51.906  | 28.5                   | 10              | 18          | 5.5                    | 3               | 4           |
| A0JNK3           | HTRA2       | Serine protease HTRA2,                                      | 49.163  | 2.2                    | 1               | 2           | 2.8                    | 1               | 1           |
| E1BNY9           | HUWE1       | Uncharacterized protein                                     | 482.19  | #N/A                   | #N/A            | #N/A        | 0.6                    | 3               | 3           |
| F1MEW9           | HVCN1       | Uncharacterized protein (Fragment)                          | 31.139  | #N/A                   | #N/A            | #N/A        | 12.4                   | 3               | 5           |
| E1B748           | HYOU1       | Uncharacterized protein                                     | 111.68  | 51.7                   | 51              | 229         | 32.1                   | 33              | 152         |
| Q3SZ16           | IAH1        | Isoamyl acetate-hydrolyzing esterase 1 homolog              | 27.578  | 11.2                   | 2               | 4           | #N/A                   | #N/A            | #N/A        |
| A7MBC5           | IARS        | IARS protein                                                | 144.64  | 31                     | 34              | 72          | 9.9                    | 14              | 33          |
| G3MWG4           | IARS2       | Uncharacterized protein (Fragment)                          | 103.67  | 29.7                   | 24              | 60          | 17.2                   | 14              | 28          |
| E1BC94           | IBA57       | Uncharacterized protein                                     | 38.231  | 19.6                   | 5               | 7           | 9.8                    | 3               | 3           |
| E1BF83           | ICA1L       | Uncharacterized protein                                     | 54.059  | 5.6                    | 3               | 5           | #N/A                   | #N/A            | #N/A        |
| G3N1V4           | ICMT        | Uncharacterized protein (Fragment)                          | 32.103  | 3.5                    | 2               | 3           | #N/A                   | #N/A            | #N/A        |
| Q3T116           | ICT1        | Peptidyl-tRNA hydrolase ICT1, mitochondrial                 | 23.306  | 10.2                   | 2               | 2           | #N/A                   | #N/A            | #N/A        |
| Q24K02           | IDE         | Insulin-degrading enzyme                                    | 118.1   | 4.1                    | 4               | 4           | #N/A                   | #N/A            | #N/A        |
| Q9XSG3           | IDH1        | Isocitrate dehydrogenase [NADP] cytoplasmic                 | 46.785  | 59.4                   | 23              | 63          | 30.9                   | 14              | 44          |
| F1MN74           | IDH3A       | Isocitrate dehydrogenase [NAD] subunit alpha, mitochondrial | 39.669  | 48.9                   | 14              | 56          | 25.7                   | 10              | 43          |
| 077784           | IDH3B       | Isocitrate dehydrogenase [NAD] subunit beta, mitochondrial  | 42.497  | 28.3                   | 10              | 26          | #N/A                   | #N/A            | #N/A        |
| Q58D96           | IDH3G       | Isocitrate dehydrogenase 3 (NAD+) gamma isoform a           | 42.392  | 35.6                   | 10              | 23          | 16.8                   | 7               | 15          |
| Q1LZ95           | IDI1        | Isopentenyl-diphosphate Delta-                              | 26.467  | 36.1                   | 8               | 21          | 13.7                   | 3               | 5           |
| E1BJZ0           | IFIH1       | Uncharacterized protein                                     | 115.34  | #N/A                   | #N/A            | #N/A        | 1.3                    | 1               | 4           |
| E1BFI4           | IGF2BP2     | Uncharacterized protein                                     | 66.009  | 38.4                   | 17              | 39          | 19.5                   | 9               | 18          |
| F1MPB2           | IGF2BP3     | Uncharacterized protein                                     | 63.856  | 50.2                   | 26              | 94          | 45.5                   | 22              | 138         |
| F1MTR4           | IGSF8       | Uncharacterized protein                                     | 64.416  | 11                     | 5               | 9           | 6.7                    | 4               | 5           |
| Q95KV0           | IKBKB       | Inhibitor of nuclear factor kappa-B kinase subunit beta     | 86.646  | 12.4                   | 9               | 16          | 1.5                    | 1               | 1           |
| Q95KU9           | IKBKG       | NF-kappa-B essential modulator                              | 48.569  | 3.8                    | 1               | 1           | #N/A                   | #N/A            | #N/A        |

| Accession number | Gene symbol | Discription                                                       | MW(kDa) | Biological Replicate 1 |                 |             | Biological Replicate 2 |                 |             |
|------------------|-------------|-------------------------------------------------------------------|---------|------------------------|-----------------|-------------|------------------------|-----------------|-------------|
|                  |             |                                                                   |         | Sequence coverage(%)   | Unique peptides | MS/MS count | Sequence coverage(%)   | Unique peptides | MS/MS count |
| A6QNQ9           | ILDR1       | ILDR1 protein                                                     | 63.378  | 2.2                    | 1               | 1           | #N/A                   | #N/A            | #N/A        |
| F2Z4E7           | ILF2        | Uncharacterized protein                                           | 43.062  | 10                     | 4               | 6           | 4.1                    | 1               | 2           |
| F1MMA0           | ILF3        | Uncharacterized protein                                           | 95.392  | 5.5                    | 5               | 9           | 3.2                    | 3               | 5           |
| Q0IIF0           | ILKAP       | Integrin-linked kinase-associated serine/threonine phosphatase 2C | 40.621  | 3.2                    | 1               | 1           | #N/A                   | #N/A            | #N/A        |
| A6QQT9           | ILVBL       | Acetolactate synthase-like protein                                | 68.109  | 11.7                   | 5               | 9           | 6.2                    | 3               | 3           |
| F1MXX0           | IMMT        | Uncharacterized protein                                           | 83.043  | 58.3                   | 46              | 150         | 46.6                   | 36              | 164         |
| P20456           | IMPA1       | Inositol monophosphatase 1                                        | 30.055  | 49.5                   | 17              | 49          | 36.1                   | 12              | 50          |
| Q2KJ53           | IMPAD1      | Inositol monophosphatase 3                                        | 38.923  | 4.1                    | 2               | 2           | #N/A                   | #N/A            | #N/A        |
| A0JNA3           | IMPDH1      | Inosine-5-monophosphate                                           | 55.423  | 3.7                    | 2               | 2           | #N/A                   | #N/A            | #N/A        |
| Q3SWY3           | IMPDH2      | Inosine-5-monophosphate                                           | 55.762  | 14.6                   | 5               | 8           | 8.9                    | 4               | 7           |
| P07994           | INHA        | Inhibin alpha chain                                               | 38.809  | 6.9                    | 2               | 5           | 2.8                    | 1               | 3           |
| P21327           | INPP1       | Inositol polyphosphate 1-                                         | 43.965  | 51.5                   | 18              | 46          | 22.2                   | 9               | 20          |
| F1MCQ6           | INPP5F      | Uncharacterized protein (Fragment)                                | 58.198  | 11.6                   | 6               | 10          | 11.6                   | 6               | 9           |
| E1BBJ7           | INPPL1      | Uncharacterized protein                                           | 139     | #N/A                   | #N/A            | #N/A        | 1                      | 1               | 1           |
| F1MC23           | INSRR       | Tyrosine-protein kinase receptor                                  | 144.55  | 0.9                    | 2               | 4           | #N/A                   | #N/A            | #N/A        |
| E1BN70           | INTS3       | Uncharacterized protein                                           | 117.89  | 3.4                    | 2               | 3           | #N/A                   | #N/A            | #N/A        |
| Q2KJA6           | INTS9       | Integrator complex subunit 9                                      | 73.837  | 18.4                   | 11              | 14          | #N/A                   | #N/A            | #N/A        |
| E1BEW3           | IP011       | Uncharacterized protein                                           | 112.24  | 7.3                    | 6               | 8           | #N/A                   | #N/A            | #N/A        |
| A7YWD2           | IP013       | Importin-13                                                       | 108.14  | 4.3                    | 4               | 4           | 1.1                    | 1               | 1           |
| F1MPE5           | IP05        | Uncharacterized protein (Fragment)                                | 125.02  | 50.6                   | 44              | 113         | 13.8                   | 15              | 45          |
| E1BGE5           | IP07        | Uncharacterized protein                                           | 119.53  | 23                     | 19              | 42          | 6.5                    | 6               | 10          |
| G5E567           | IP09        | Uncharacterized protein (Fragment)                                | 110.01  | 4.6                    | 4               | 4           | #N/A                   | #N/A            | #N/A        |
| Q29RS3           | IQCB1       | IQ motif containing B1                                            | 68.507  | 1.7                    | 1               | 1           | #N/A                   | #N/A            | #N/A        |
| F1MC48           | IQGAP1      | Uncharacterized protein                                           | 182.78  | 6.6                    | 7               | 9           | 2.1                    | 4               | 5           |
| F1MTR1           | IQGAP2      | Uncharacterized protein                                           | 178.5   | 14.1                   | 18              | 24          | 4.7                    | 7               | 10          |
| F1MYE9           | IQSEC1      | Uncharacterized protein (Fragment)                                | 120.06  | 1.6                    | 1               | 1           | #N/A                   | #N/A            | #N/A        |
| Q1RMT8           | IRAK4       | Interleukin-1 receptor-associated                                 | 51.574  | 14.1                   | 6               | 6           | 7.2                    | 3               | 4           |
| Q4JF28           | IRF3        | Interferon regulatory factor 3                                    | 46.645  | #N/A                   | #N/A            | #N/A        | 2.2                    | 1               | 1           |
| Q08DD6           | IRF6        | Interferon regulatory factor 6                                    | 53.104  | 5.8                    | 2               | 2           | #N/A                   | #N/A            | #N/A        |
| Q3SZG8           | ISCA1       | Iron-sulfur cluster assembly 1 homolog, mitochondrial             | 14.179  | 9.3                    | 1               | 1           | 9.3                    | 1               | 2           |

| Accession number | Gene symbol | Discription                                             | MW(kDa) | Biological Replicate 1 |                 |             | Biological Replicate 2 |                 |             |
|------------------|-------------|---------------------------------------------------------|---------|------------------------|-----------------|-------------|------------------------|-----------------|-------------|
|                  |             |                                                         |         | Sequence coverage(%)   | Unique peptides | MS/MS count | Sequence coverage(%)   | Unique peptides | MS/MS count |
| Q2TBG7           | ISCA2       | Iron-sulfur cluster assembly 2 homolog, mitochondrial   | 16.435  | #N/A                   | #N/A            | #N/A        | 15.8                   | 2               | 2           |
| Q17QE6           | ISCU        | Iron-sulfur cluster scaffold homolog (E. coli)          | 17.852  | 9                      | 2               | 2           | 9.6                    | 2               | 3           |
| A6QLY4           | ISOC1       | Isochorismatase domain-containing protein 1             | 32.115  | 37.2                   | 11              | 20          | 19.8                   | 7               | 13          |
| E1BCH6           | ISPD        | Isoprenoid synthase domain-containing protein           | 49.51   | 7                      | 3               | 3           | 13                     | 6               | 10          |
| Q3ZBV1           | IST1        | IST1 homolog                                            | 39.79   | 26.9                   | 10              | 20          | 13.5                   | 5               | 16          |
| Q2NL29           | ISYNA1      | Inositol-3-phosphate synthase 1                         | 60.761  | 17.6                   | 9               | 16          | 4.7                    | 3               | 3           |
| F1MGQ5           | ITCH        | E3 ubiquitin-protein ligase                             | 98.64   | 14.3                   | 8               | 15          | 2.9                    | 3               | 4           |
| Q2HJE5           | ITFG3       | Protein ITFG3                                           | 58.766  | 1.8                    | 1               | 1           | #N/A                   | #N/A            | #N/A        |
| P53710           | ITGA2       | Integrin alpha-2 (Fragment)                             | 128.93  | 7.6                    | 8               | 12          | 4.7                    | 5               | 9           |
| E1BFQ6           | ITGA6       | Uncharacterized protein                                 | 119.23  | 22.5                   | 20              | 39          | 8.6                    | 10              | 30          |
| P80746           | ITGAV       | Integrin alpha-V                                        | 116.13  | 15                     | 15              | 27          | 8.1                    | 10              | 16          |
| P53712           | ITGB1       | Integrin beta-1                                         | 88.093  | 15.8                   | 9               | 20          | 4.9                    | 4               | 15          |
| F1MTN1           | ITGB3       | Integrin beta                                           | 86.536  | 6                      | 4               | 4           | 2.8                    | 2               | 4           |
| E1B864           | ITGB4       | Integrin beta                                           | 200.31  | 11.9                   | 17              | 22          | 7.1                    | 12              | 22          |
| F1MK32           | ITGB5       | Integrin beta (Fragment)                                | 82.596  | 11.6                   | 7               | 10          | 2.7                    | 2               | 9           |
| Q2KIC5           | ITPA        | Inosine triphosphate                                    | 23.061  | 18.8                   | 3               | 7           | 7.7                    | 2               | 4           |
| POCOT1           | ITPK1       | Inositol-tetrakisphosphate 1-kinase                     | 45.842  | 8.1                    | 2               | 3           | #N/A                   | #N/A            | #N/A        |
| F1MX21           | ITPR1       | Inositol 1,4,5-trisphosphate receptor type 1 (Fragment) | 302.89  | 3.7                    | 7               | 13          | 4.7                    | 13              | 15          |
| Q8WN95           | ITPR3       | Inositol 1,4,5-trisphosphate receptor type 3            | 303.04  | 1.7                    | 2               | 3           | #N/A                   | #N/A            | #N/A        |
| F1MC50           | ITSN2       | Uncharacterized protein (Fragment)                      | 190.87  | 6.3                    | 9               | 12          | 4                      | 7               | 10          |
| Q3SZI8           | IVD         | Isovaleryl-CoA dehydrogenase, mitochondrial             | 46.497  | 34.7                   | 12              | 26          | 14.6                   | 7               | 20          |
| Q2NKY9           | JAGN1       | Protein jagunal homolog 1                               | 21.102  | #N/A                   | #N/A            | #N/A        | 6.6                    | 1               | 2           |
| A6QR54           | JAKMIP1     | Janus kinase and microtubule-interacting protein 1      | 73.27   | 1.4                    | 1               | 1           | #N/A                   | #N/A            | #N/A        |
| A7YW22           | JAM3        | JAM3 protein                                            | 33.824  | #N/A                   | #N/A            | #N/A        | 3.3                    | 1               | 2           |

| Accession number | Gene symbol | Discription                                                          | MW(kDa) | Biological Replicate 1 |                 |             | Biological Replicate 2 |                 |             |
|------------------|-------------|----------------------------------------------------------------------|---------|------------------------|-----------------|-------------|------------------------|-----------------|-------------|
|                  |             |                                                                      |         | Sequence coverage(%)   | Unique peptides | MS/MS count | Sequence coverage(%)   | Unique peptides | MS/MS count |
| F1MEH3           | JMJD7       | Uncharacterized protein                                              | 36.043  | 29.1                   | 6               | 11          | 7.3                    | 2               | 3           |
| F1MPX6           | JMJD8       | Uncharacterized protein (Fragment)                                   | 32.483  | #N/A                   | #N/A            | #N/A        | 7.7                    | 2               | 3           |
| F1ME39           | JOSD2       | Uncharacterized protein (Fragment)                                   | 22.663  | 4.8                    | 1               | 1           | #N/A                   | #N/A            | #N/A        |
| Q8SPJ1           | JUP         | Junction plakoglobin                                                 | 81.82   | 8.6                    | 2               | 2           | #N/A                   | #N/A            | #N/A        |
| F1MMK8           | KARS        | Lysine--tRNA ligase                                                  | 71.346  | 31.5                   | 20              | 40          | 17.7                   | 13              | 38          |
| E1BH39           | KATNA1      | Katanin p60 ATPase-containing                                        | 55.92   | 4.9                    | 2               | 4           | #N/A                   | #N/A            | #N/A        |
| E1BHF2           | KATNAL1     | Uncharacterized protein                                              | 55.382  | 4.7                    | 1               | 1           | #N/A                   | #N/A            | #N/A        |
| E1BAN2           | KATNAL2     | Uncharacterized protein (Fragment)                                   | 59.893  | 2.2                    | 1               | 2           | 2.2                    | 1               | 12          |
| A6QQU1           | KATNB1      | Katanin p80 WD40 repeat-containing subunit B1                        | 73.018  | 2.4                    | 1               | 1           | #N/A                   | #N/A            | #N/A        |
| A7MB51           | KBTBD2      | KBTBD2 protein                                                       | 53.575  | #N/A                   | #N/A            | #N/A        | 4.1                    | 2               | 2           |
| G3N1I7           | KBTBD7      | Uncharacterized protein                                              | 76.741  | #N/A                   | #N/A            | #N/A        | 1.5                    | 1               | 1           |
| F1N465           | KBTBD8      | Uncharacterized protein                                              | 68.882  | 9.3                    | 5               | 6           | 3.5                    | 2               | 2           |
| Q1LZE1           | KCMF1       | E3 ubiquitin-protein ligase KCMF1                                    | 41.947  | 4.5                    | 1               | 1           | 2.9                    | 1               | 2           |
| A6QLV6           | KCTD10      | KCTD10 protein                                                       | 35.717  | 3.5                    | 2               | 4           | #N/A                   | #N/A            | #N/A        |
| Q2T9W0           | KCTD13      | BTB/POZ domain-containing adapter for CUL3-mediated RhoA degradation | 36.425  | 3                      | 1               | 1           | #N/A                   | #N/A            | #N/A        |
| A5PKG7           | KCTD5       | BTB/POZ domain-containing protein                                    | 25.986  | 5.1                    | 1               | 2           | #N/A                   | #N/A            | #N/A        |
| A6QLT0           | KCTD6       | KCTD6 protein                                                        | 27.578  | 5.9                    | 1               | 1           | #N/A                   | #N/A            | #N/A        |
| F1MZX7           | KDELC2      | Uncharacterized protein (Fragment)                                   | 59.462  | 1.5                    | 1               | 1           | #N/A                   | #N/A            | #N/A        |
| Q2KJ37           | KDELR2      | ER lumen protein retaining receptor                                  | 24.454  | 12.7                   | 2               | 4           | 3.8                    | 1               | 4           |
| F1MBS5           | KDM1A       | Uncharacterized protein                                              | 94.564  | 15.7                   | 11              | 17          | 2.9                    | 3               | 4           |
| E1BPZ5           | KDM1B       | Uncharacterized protein                                              | 91.988  | 1.5                    | 1               | 1           | #N/A                   | #N/A            | #N/A        |
| F1MLE5           | KDSR        | 3-ketodihydrosphingosine reductase (Fragment)                        | 34.905  | 7.8                    | 2               | 2           | #N/A                   | #N/A            | #N/A        |
| E1BPE9           | KHDC3L      | Uncharacterized protein                                              | 24.933  | 44.9                   | 9               | 89          | 36.4                   | 7               | 88          |
| Q29RQ2           | KHDRBS1     | KH domain containing, RNA binding, signal transduction associated 1  | 48.207  | #N/A                   | #N/A            | #N/A        | 4.1                    | 2               | 4           |
| F1MHR6           | KHSRP       | Uncharacterized protein (Fragment)                                   | 73.523  | 1.4                    | 1               | 1           | #N/A                   | #N/A            | #N/A        |
| F1MKJ5           | KIAA0196    | Uncharacterized protein (Fragment)                                   | 134.81  | 31.5                   | 37              | 65          | 18.4                   | 22              | 39          |
| F1ML49           | KIAA0319L   | Uncharacterized protein (Fragment)                                   | 115.9   | 5.1                    | 6               | 7           | 3.6                    | 4               | 6           |
| F1MGK9           | KIAA0368    | Uncharacterized protein                                              | 203.94  | 6.9                    | 12              | 14          | 0.9                    | 2               | 3           |

| Accession number | Gene symbol | Discription                        | MW(kDa) | Biological Replicate 1 |                 |             | Biological Replicate 2 |                 |             |
|------------------|-------------|------------------------------------|---------|------------------------|-----------------|-------------|------------------------|-----------------|-------------|
|                  |             |                                    |         | Sequence coverage(%)   | Unique peptides | MS/MS count | Sequence coverage(%)   | Unique peptides | MS/MS count |
| E1BFB5           | KIAA0391    | Uncharacterized protein            | 67.73   | 5                      | 3               | 5           | #N/A                   | #N/A            | #N/A        |
| G5E600           | KIAA1033    | Uncharacterized protein            | 136.5   | 18.8                   | 23              | 36          | 8.9                    | 11              | 15          |
| E1BJ48           | KIAA1045    | Uncharacterized protein            | 45.111  | 3.5                    | 1               | 1           | #N/A                   | #N/A            | #N/A        |
| F1MN85           | KIAA1147    | Uncharacterized protein (Fragment) | 42.137  | 17.4                   | 5               | 16          | 3.5                    | 1               | 1           |
| F1MLS8           | KIAA1217    | Uncharacterized protein            | 199.17  | #N/A                   | #N/A            | #N/A        | 1.7                    | 2               | 2           |
| E1BH07           | KIAA1274    | Uncharacterized protein            | 84.843  | 1.3                    | 1               | 6           | #N/A                   | #N/A            | #N/A        |
| F1MKR0           | KIAA1432    | Uncharacterized protein            | 158.91  | 2.4                    | 3               | 4           | 3.4                    | 4               | 5           |
| G5E512           | KIAA1462    | Uncharacterized protein            | 140.06  | #N/A                   | #N/A            | #N/A        | 1.1                    | 1               | 2           |
| E1BM42           | KIAA1468    | Uncharacterized protein            | 133.96  | #N/A                   | #N/A            | #N/A        | 0.9                    | 1               | 1           |
| F1MUA7           | KIAA1598    | Uncharacterized protein (Fragment) | 69.025  | 34.5                   | 22              | 44          | 18.9                   | 11              | 25          |
| F6RBJ1           | KIAA1715    | Uncharacterized protein            | 48.143  | 14.7                   | 6               | 9           | 10.7                   | 4               | 6           |
| E1BMF4           | KIDINS220   | Uncharacterized protein            | 196.14  | 16.8                   | 26              | 43          | 6.3                    | 12              | 16          |
| E1BF29           | KIF11       | Uncharacterized protein            | 119     | 2.7                    | 2               | 2           | 2.6                    | 3               | 3           |
| E1BBY6           | KIF12       | Uncharacterized protein            | 70.735  | 2.8                    | 2               | 2           | #N/A                   | #N/A            | #N/A        |
| E1BGB0           | KIF13B      | Uncharacterized protein            | 207.15  | 4.7                    | 7               | 9           | 1.3                    | 3               | 4           |
| G5E5S3           | KIF14       | Uncharacterized protein (Fragment) | 141.49  | #N/A                   | #N/A            | #N/A        | 1.1                    | 2               | 3           |
| E1BDH4           | KIF18A      | Uncharacterized protein            | 101.69  | 1                      | 1               | 1           | #N/A                   | #N/A            | #N/A        |
| E1BBN7           | KIF1B       | Uncharacterized protein            | 204.53  | 1.2                    | 3               | 4           | #N/A                   | #N/A            | #N/A        |
| Q29RT6           | KIF20A      | Kinesin-like protein KIF20A        | 100.04  | 13.7                   | 10              | 11          | #N/A                   | #N/A            | #N/A        |
| A5D7N6           | KIF23       | KIF23 protein                      | 109.08  | 12.3                   | 10              | 14          | 8.7                    | 8               | 16          |
| F1MNK8           | KIF26B      | Uncharacterized protein (Fragment) | 163.95  | 1.4                    | 2               | 2           | #N/A                   | #N/A            | #N/A        |
| Q2NL05           | KIF2A       | Kinesin-like protein KIF2A         | 74.993  | 5.8                    | 2               | 2           | #N/A                   | #N/A            | #N/A        |
| A6QPE8           | KIF2C       | KIF2C protein                      | 81.023  | 13.7                   | 7               | 10          | 6.6                    | 5               | 6           |
| E1B999           | KIF3A       | Uncharacterized protein            | 82.796  | 11.7                   | 6               | 8           | 7.6                    | 4               | 9           |
| F1N020           | KIF3B       | Uncharacterized protein            | 84.908  | 17.4                   | 11              | 19          | 9                      | 7               | 12          |
| F1MCP5           | KIF4A       | Uncharacterized protein (Fragment) | 140.45  | 3.1                    | 3               | 4           | #N/A                   | #N/A            | #N/A        |
| F1N1G7           | KIF5B       | Uncharacterized protein            | 109.78  | 25.6                   | 16              | 37          | 16.2                   | 12              | 33          |
| F6RAG5           | KIF5C       | Uncharacterized protein            | 109.19  | 11                     | 4               | 6           | #N/A                   | #N/A            | #N/A        |
| Q3MHI2           | KIFAP3      | Kinesin-associated protein 3       | 91.174  | 10.8                   | 7               | 9           | 3.9                    | 2               | 2           |
| A7MBA1           | KIFC1       | KIFC1 protein                      | 73.533  | #N/A                   | #N/A            | #N/A        | 3.3                    | 2               | 2           |
| E1BND1           | KIN         | Uncharacterized protein            | 45.217  | 3.1                    | 1               | 1           | 5.6                    | 2               | 3           |
| P43481           | KIT         | Mast/stem cell growth factor       | 109.68  | 4.4                    | 4               | 4           | 5.9                    | 6               | 10          |

| Accession number | Gene symbol | Discription                                             | MW(kDa) | Biological Replicate 1 |                 |             | Biological Replicate 2 |                 |             |
|------------------|-------------|---------------------------------------------------------|---------|------------------------|-----------------|-------------|------------------------|-----------------|-------------|
|                  |             |                                                         |         | Sequence coverage(%)   | Unique peptides | MS/MS count | Sequence coverage(%)   | Unique peptides | MS/MS count |
| A6H7H2           | KLC1        | KLC1 protein                                            | 70.35   | 13.2                   | 3               | 8           | #N/A                   | #N/A            | #N/A        |
| Q08DH4           | KLC2        | Kinesin light chain 2                                   | 68.71   | 6.8                    | 1               | 1           | 6.1                    | 2               | 6           |
| Q2TBQ9           | KLC3        | Kinesin light chain 3                                   | 55.583  | 7.1                    | 2               | 3           | 1.8                    | 1               | 2           |
| E1BGH2           | KLHDC4      | Uncharacterized protein                                 | 65.555  | 5.6                    | 3               | 4           | #N/A                   | #N/A            | #N/A        |
| E1BN42           | KLHDC9      | Uncharacterized protein                                 | 37.519  | 5.2                    | 2               | 3           | #N/A                   | #N/A            | #N/A        |
| A7MBJ7           | KLHL18      | KLHL18 protein                                          | 64.354  | 8.6                    | 5               | 9           | 6.2                    | 4               | 6           |
| F1N592           | KLHL25      | Uncharacterized protein                                 | 65.776  | 25.1                   | 15              | 26          | 12.2                   | 8               | 18          |
| Q0VCQ5           | KLHL7       | Kelch-like 7 (Drosophila)                               | 65.982  | 3.6                    | 2               | 4           | 4.1                    | 2               | 3           |
| A5D7H6           | KLRAQ1      | KLRAQ1 protein                                          | 88.353  | 4.6                    | 4               | 4           | 2.8                    | 2               | 3           |
| E1BBQ0           | KNTC1       | Uncharacterized protein                                 | 254.91  | 3                      | 7               | 7           | 2.5                    | 7               | 8           |
| Q3SYV6           | KPNA2       | Importin subunit alpha                                  | 57.925  | 22.3                   | 9               | 16          | 3.4                    | 1               | 2           |
| F1MIZ9           | KPNA3       | Importin subunit alpha                                  | 55.019  | 15.7                   | 1               | 1           | 4.2                    | 2               | 3           |
| C1JZ67           | KPNA4       | Importin subunit alpha                                  | 57.9    | 27.8                   | 4               | 16          | #N/A                   | #N/A            | #N/A        |
| G5E536           | KPNA6       | Importin subunit alpha (Fragment)                       | 59.749  | 39.8                   | 17              | 40          | 16.4                   | 7               | 21          |
| C1JZ66           | KPNA7       | Importin subunit alpha-8                                | 57.362  | 45.4                   | 17              | 49          | 13                     | 6               | 20          |
| E1BFV0           | KPNB1       | Uncharacterized protein                                 | 97.226  | 44.6                   | 31              | 137         | 22.3                   | 18              | 65          |
| F6S1Q0           | KRT18       | Uncharacterized protein                                 | 47.964  | 3.7                    | 1               | 5           | 5.6                    | 2               | 7           |
| E1B991           | KRT2        | Uncharacterized protein                                 | 64.333  | 7.9                    | 2               | 2           | 9.6                    | 1               | 1           |
| A6QNX5           | KRT78       | Keratin, type II cytoskeletal 78                        | 57.463  | #N/A                   | #N/A            | #N/A        | 3                      | 1               | 2           |
| G3MX98           | KRT9        | Uncharacterized protein                                 | 54.654  | 3.1                    | 1               | 1           | #N/A                   | #N/A            | #N/A        |
| F1MLU7           | KTN1        | Uncharacterized protein                                 | 150.66  | 18                     | 21              | 33          | 10.2                   | 14              | 25          |
| P83095           | LACTB       | Serine beta-lactamase-like protein LACTB, mitochondrial | 61.682  | 24.8                   | 12              | 25          | 11.2                   | 6               | 10          |
| Q0VCZ7           | LAD1        | Ladinin 1                                               | 50.172  | 13.5                   | 8               | 25          | 22.9                   | 11              | 36          |
| F1MDD5           | LAMA3       | Uncharacterized protein (Fragment)                      | 357.11  | #N/A                   | #N/A            | #N/A        | 0.6                    | 2               | 2           |
| Q05204           | LAMP1       | Lysosome-associated membrane glycoprotein 1             | 44.152  | 12.7                   | 6               | 18          | 8.6                    | 4               | 29          |
| Q3SZJ7           | LAMP2       | Lysosomal-associated membrane                           | 44.542  | 12.3                   | 7               | 16          | 8.6                    | 5               | 19          |
| Q3TOD8           | LAMTOR1     | Ragulator complex protein LAMTOR1                       | 17.731  | 15.5                   | 2               | 4           | 15.5                   | 3               | 12          |
| Q3T132           | LAMTOR2     | Ragulator complex protein LAMTOR2                       | 13.507  | 35.2                   | 3               | 7           | 16.8                   | 2               | 3           |
| Q17QQ1           | LAMTOR3     | Ragulator complex protein LAMTOR3                       | 13.65   | 39.5                   | 5               | 8           | 8.1                    | 1               | 1           |
| F1MVX2           | LANCL1      | Uncharacterized protein                                 | 45.308  | 41.4                   | 13              | 48          | 24.1                   | 8               | 16          |

| Accession number | Gene symbol | Discription                                                  | MW(kDa) | Biological Replicate 1 |                 |             | Biological Replicate 2 |                 |             |
|------------------|-------------|--------------------------------------------------------------|---------|------------------------|-----------------|-------------|------------------------|-----------------|-------------|
|                  |             |                                                              |         | Sequence coverage(%)   | Unique peptides | MS/MS count | Sequence coverage(%)   | Unique peptides | MS/MS count |
| A6QPG6           | LANCL2      | LANCL2 protein                                               | 49.166  | 25.9                   | 9               | 16          | 6.5                    | 3               | 5           |
| F1MZU1           | LARP1       | Uncharacterized protein (Fragment)                           | 108.78  | 10.7                   | 8               | 11          | 6.1                    | 7               | 12          |
| F1MHX7           | LARP4B      | Uncharacterized protein                                      | 80.133  | 4.8                    | 3               | 5           | 7                      | 5               | 6           |
| A6QLR2           | LARS        | LARS protein                                                 | 134.81  | 25.2                   | 26              | 45          | 11.4                   | 14              | 27          |
| Q3B7M5           | LASP1       | LIM and SH3 domain protein 1                                 | 29.677  | 35.8                   | 9               | 14          | 19.2                   | 6               | 15          |
| A6QQ18           | LASS5       | LASS5 protein                                                | 44.717  | 5.2                    | 3               | 5           | #N/A                   | #N/A            | #N/A        |
| Q3TOH0           | LCMT1       | Leucine carboxyl methyltransferase                           | 38.009  | 19                     | 8               | 17          | 8.4                    | 3               | 7           |
| G3NOF1           | LCMT2       | Uncharacterized protein                                      | 75.549  | 8.8                    | 5               | 5           | #N/A                   | #N/A            | #N/A        |
| F1MYX5           | LCP1        | Uncharacterized protein                                      | 70.111  | 6.4                    | 2               | 3           | #N/A                   | #N/A            | #N/A        |
| P19858           | LDHA        | L-lactate dehydrogenase A chain                              | 36.597  | 77.1                   | 23              | 186         | 37.7                   | 13              | 84          |
| Q5E9B1           | LDHB        | L-lactate dehydrogenase B chain                              | 36.723  | 56.3                   | 15              | 105         | 31.1                   | 10              | 62          |
| A4FUW5           | LEO1        | LEO1 protein                                                 | 66.095  | 4.3                    | 2               | 4           | #N/A                   | #N/A            | #N/A        |
| Q0VCA3           | LETM1       | LETM1 and EF-hand domain-containing protein 1, mitochondrial | 81.817  | 23.1                   | 15              | 18          | 12.7                   | 10              | 18          |
| F1N3F1           | LETMD1      | LETM1 domain-containing protein 1                            | 41.928  | 3.9                    | 1               | 2           | 2.5                    | 1               | 1           |
| P11116           | LGALS1      | Galectin-1                                                   | 14.744  | 51.1                   | 7               | 23          | 58.5                   | 8               | 25          |
| A6QLZ0           | LGALS3      | Galectin                                                     | 27.646  | 29.4                   | 7               | 15          | 17.4                   | 5               | 18          |
| Q2YDD7           | LGALS8      | Galectin                                                     | 40.127  | 6.4                    | 2               | 4           | 8.1                    | 3               | 10          |
| Q95M12           | LGMN        | Legumain                                                     | 49.283  | 10.2                   | 4               | 4           | 5.1                    | 2               | 2           |
| Q5E9G8           | LGP2        | Putative uncharacterized protein                             | 77.169  | 9.3                    | 4               | 4           | 5.1                    | 3               | 6           |
| Q5BIP7           | LIAS        | Lipoyl synthase, mitochondrial                               | 42.035  | 20.4                   | 6               | 7           | 6.7                    | 2               | 2           |
| A4IFC8           | LIG1        | DNA ligase                                                   | 101.31  | 45.4                   | 39              | 115         | 21                     | 20              | 57          |
| F1MQY1           | LIG3        | DNA ligase                                                   | 105.12  | #N/A                   | #N/A            | #N/A        | 1.2                    | 1               | 2           |
| E1BHM3           | LIN28A      | Uncharacterized protein                                      | 22.388  | 6.8                    | 1               | 1           | #N/A                   | #N/A            | #N/A        |
| Q0P5F3           | LIN7C       | Protein lin-7 homolog C                                      | 21.834  | 24.4                   | 5               | 6           | 5.1                    | 1               | 1           |
| F1N110           | LIPA        | Lipase                                                       | 45.67   | 7.8                    | 3               | 11          | 2.8                    | 1               | 7           |
| O46419           | LIPT1       | Lipoyltransferase 1, mitochondrial                           | 42.072  | #N/A                   | #N/A            | #N/A        | 3.2                    | 1               | 1           |
| E1BI46           | LIPT2       | Putative lipoyltransferase 2, mitochondrial (Fragment)       | 24.421  | 36.3                   | 7               | 14          | 13.3                   | 4               | 13          |
| Q08E42           | LLRC8A      | Leucine rich repeat containing 8 family, member A            | 94.009  | 4                      | 3               | 7           | 1.1                    | 1               | 1           |
| F1ME46           | LMAN1       | Uncharacterized protein                                      | 58.188  | 11.2                   | 7               | 10          | 8.3                    | 5               | 9           |



| Accession number | Gene symbol  | Discription                        | MW(kDa) | Biological Replicate 1 |                 |             | Biological Replicate 2 |                 |             |
|------------------|--------------|------------------------------------|---------|------------------------|-----------------|-------------|------------------------|-----------------|-------------|
|                  |              |                                    |         | Sequence coverage(%)   | Unique peptides | MS/MS count | Sequence coverage(%)   | Unique peptides | MS/MS count |
| A6QP36           | LMAN2        | LMAN2 protein                      | 40.401  | 40.7                   | 13              | 31          | 23.1                   | 9               | 33          |
| Q2HJD1           | LMAN2L       | VIP36-like protein                 | 39.991  | 3.7                    | 2               | 2           | #N/A                   | #N/A            | #N/A        |
| Q3SYY9           | LMBRD1       | Probable lysosomal cobalamin       | 62.022  | 7.4                    | 4               | 14          | #N/A                   | #N/A            | #N/A        |
| A1L504           | LMF2         | Lipase maturation factor 2         | 79.265  | 11                     | 6               | 12          | 6.7                    | 4               | 5           |
| F1MYG5           | LMNA         | Uncharacterized protein            | 74.126  | 21.7                   | 14              | 21          | 23.2                   | 15              | 25          |
| E1B8N6           | LMNB1        | Uncharacterized protein            | 66.125  | 1.7                    | 1               | 1           | #N/A                   | #N/A            | #N/A        |
| A8E4L8           | LMO7         | LMO7 protein                       | 157.57  | 17.2                   | 22              | 37          | 14.6                   | 21              | 34          |
| F1N1Q8           | LNPEP        | Uncharacterized protein (Fragment) | 116.85  | 9.7                    | 9               | 12          | 1.8                    | 2               | 2           |
| E1BIB8           | LOC100139891 | Uncharacterized protein (Fragment) | 15.309  | 18.9                   | 3               | 4           | 13.3                   | 2               | 2           |
| F1MNH8           | LOC100140907 | Uncharacterized protein            | 77.328  | 3.4                    | 2               | 3           | #N/A                   | #N/A            | #N/A        |
| F1MNF8           | LOC100141266 | Uncharacterized protein            | 49.902  | 70.8                   | 2               | 192         | 38.3                   | 1               | 14          |
| F1MUX5           | LOC100295687 | Uncharacterized protein (Fragment) | 26.724  | 45.4                   | 5               | 35          | 21                     | 1               | 3           |
| G3MZ99           | LOC100299732 | Uncharacterized protein            | 35.863  | 3.7                    | 1               | 1           | #N/A                   | #N/A            | #N/A        |
| G3MZH8           | LOC100301381 | Uncharacterized protein (Fragment) | 10.257  | 20.9                   | 2               | 2           | 30.8                   | 3               | 6           |
| F1N453           | LOC100336115 | Histone H2B                        | 13.919  | #N/A                   | #N/A            | #N/A        | 34.1                   | 1               | 1           |
| G3MW12           | LOC100337053 | Uncharacterized protein (Fragment) | 129.72  | 4.3                    | 0               | 5           | #N/A                   | #N/A            | #N/A        |
| G3N081           | LOC100337473 | Histone H4                         | 10.451  | #N/A                   | #N/A            | #N/A        | 31.9                   | 3               | 7           |
| G3X795           | LOC100847883 | Uncharacterized protein (Fragment) | 63.525  | 7                      | 4               | 4           | #N/A                   | #N/A            | #N/A        |
| F1MYH7           | LOC100848970 | Uncharacterized protein (Fragment) | 69.614  | 1.5                    | 1               | 1           | #N/A                   | #N/A            | #N/A        |
| Q0G846           | LOC100851274 | LOC615521                          | 21.971  | 9.8                    | 2               | 3           | #N/A                   | #N/A            | #N/A        |
| F1MIC3           | LOC101902556 | Uncharacterized protein (Fragment) | 16.41   | 19.3                   | 1               | 1           | #N/A                   | #N/A            | #N/A        |
| F1N3X9           | LOC101904184 | Uncharacterized protein (Fragment) | 52.185  | #N/A                   | #N/A            | #N/A        | 2.2                    | 1               | 1           |
| F1N5F3           | LOC101904455 | Histone H2B (Fragment)             | 14.002  | 28                     | 2               | 3           | 21.6                   | 2               | 3           |
| F1N5S6           | LOC101906511 | Uncharacterized protein (Fragment) | 47.106  | 39                     | 13              | 20          | 7.6                    | 3               | 6           |
| G3MZD8           | LOC101907314 | Uncharacterized protein (Fragment) | 47.216  | 2.1                    | 1               | 6           | #N/A                   | #N/A            | #N/A        |
| G3MYB8           | LOC101907815 | Uncharacterized protein (Fragment) | 19.495  | 19.5                   | 2               | 7           | #N/A                   | #N/A            | #N/A        |
| G8JKV3           | LOC101909651 | Uncharacterized protein            | 11.722  | 45.3                   | 1               | 8           | #N/A                   | #N/A            | #N/A        |
| G3X6W2           | LOC101909711 | Uncharacterized protein            | 153.7   | #N/A                   | #N/A            | #N/A        | 2.5                    | 4               | 4           |
| F1NOT3           | LOC404051    | Uncharacterized protein            | 42.592  | 20.1                   | 3               | 4           | 6.9                    | 1               | 2           |
| Q2KHV9           | LOC506454    | Uncharacterized protein KIAA2013   | 69.586  | 12.3                   | 7               | 10          | 7.7                    | 5               | 13          |
| E1BN36           | LOC507383    | Olfactory receptor                 | 34.544  | 2.9                    | 1               | 1           | 2.9                    | 1               | 1           |
| G3MYS0           | LOC508073    | Uncharacterized protein            | 37.655  | 56.8                   | 16              | 44          | 26.8                   | 8               | 17          |

| Accession number | Gene symbol   | Discription                         | MW(kDa) | Biological Replicate 1 |                 |             | Biological Replicate 2 |                 |             |
|------------------|---------------|-------------------------------------|---------|------------------------|-----------------|-------------|------------------------|-----------------|-------------|
|                  |               |                                     |         | Sequence coverage(%)   | Unique peptides | MS/MS count | Sequence coverage(%)   | Unique peptides | MS/MS count |
| A6QLU9           | LOC508963     | LOC508963 protein                   | 40.028  | 4                      | 2               | 3           | 7.1                    | 3               | 4           |
| F1N429           | LOC512176     | Uncharacterized protein (Fragment)  | 46.861  | 9.9                    | 4               | 7           | #N/A                   | #N/A            | #N/A        |
| F1MGC3           | LOC512672     | Uncharacterized protein             | 41.386  | #N/A                   | #N/A            | #N/A        | 3.7                    | 1               | 3           |
| A6QLG1           | LOC515358     | LOC515358 protein                   | 20.59   | 14.4                   | 2               | 2           | #N/A                   | #N/A            | #N/A        |
| A6QLT3           | LOC520387     | LOC520387 protein                   | 115.76  | 1.4                    | 2               | 2           | 1                      | 1               | 1           |
| G3X6B1           | LOC525842     | Uncharacterized protein             | 78.981  | #N/A                   | #N/A            | #N/A        | 1.3                    | 1               | 3           |
| E1B805           | LOC528040     | Uncharacterized protein (Fragment)  | 187.27  | 0.6                    | 1               | 1           | 1                      | 2               | 2           |
| F1MPH8           | LOC528262     | Uncharacterized protein             | 47.946  | 2                      | 1               | 1           | 2                      | 1               | 2           |
| E1B952           | LOC528343     | Olfactory receptor                  | 34.921  | 1.9                    | 1               | 1           | #N/A                   | #N/A            | #N/A        |
| E1BEY9           | LOC529294     | Uncharacterized protein (Fragment)  | 41.777  | 42.9                   | 16              | 59          | 34.8                   | 14              | 55          |
| E1BFQ0           | LOC532875     | Uncharacterized protein             | 87.867  | 5.2                    | 2               | 4           | 4.2                    | 1               | 10          |
| Q2NKZ8           | LOC538702     | Glycerol kinase                     | 60.601  | 6.1                    | 4               | 4           | 4.5                    | 3               | 5           |
| A7MBF7           | LOC616332     | LOC616332 protein                   | 22.906  | 18.6                   | 3               | 15          | 3.8                    | 1               | 1           |
| E1BAC6           | LOC617785     | Uncharacterized protein (Fragment)  | 36.817  | 3                      | 1               | 2           | #N/A                   | #N/A            | #N/A        |
| E1BLG3           | LOC781298     | Uncharacterized protein             | 24.347  | 7                      | 1               | 1           | #N/A                   | #N/A            | #N/A        |
| A6QLQ4           | LOC782821     | LOC782821 protein                   | 19.667  | 4                      | 1               | 1           | #N/A                   | #N/A            | #N/A        |
| F1MR68           | LOC785899     | Olfactory receptor                  | 35.069  | #N/A                   | #N/A            | #N/A        | 2.2                    | 1               | 1           |
| F6QK33           | LOC787087     | Uncharacterized protein             | 88.495  | 3.6                    | 3               | 6           | 4.3                    | 4               | 4           |
| G3X7D5           | LOC787803     | Uncharacterized protein (Fragment)  | 15.575  | 48.9                   | 6               | 13          | 7.8                    | 1               | 6           |
| P84227           | 7; LOC504599; | Histone H3.2                        | 15.388  | 30.9                   | 1               | 1           | 17.6                   | 2               | 2           |
| A6H7H3           | LOC789567     | Estradiol 17-beta-dehydrogenase 12  | 34.928  | 41                     | 9               | 23          | 15.4                   | 4               | 19          |
| Q59HJ6           | LONP1         | Lon protease homolog, mitochondrial | 106.67  | 26.1                   | 23              | 50          | 8.9                    | 10              | 30          |
| Q3SX23           | LONP2         | Lon protease homolog 2, peroxisomal | 94.309  | 1.4                    | 1               | 1           | #N/A                   | #N/A            | #N/A        |
| F1MTK4           | LPCAT1        | Uncharacterized protein (Fragment)  | 54.33   | 5.9                    | 3               | 4           | #N/A                   | #N/A            | #N/A        |
| E1B770           | LPCAT2        | Uncharacterized protein             | 60.332  | #N/A                   | #N/A            | #N/A        | 5.3                    | 3               | 4           |
| Q3SZL3           | LPCAT3        | Lysophospholipid acyltransferase 5  | 55.833  | 9.3                    | 4               | 5           | 6                      | 3               | 4           |
| E1BCN1           | LPIN2         | Uncharacterized protein             | 98.544  | 22.7                   | 15              | 25          | 12.6                   | 12              | 35          |
| F1MV58           | LRCH4         | Uncharacterized protein             | 70.945  | 2.4                    | 1               | 3           | 1.2                    | 1               | 2           |
| E1BN69           | LRIG3         | Uncharacterized protein             | 123.11  | 1.3                    | 1               | 1           | #N/A                   | #N/A            | #N/A        |
| F6RBT3           | LRPAP1        | Uncharacterized protein             | 41.893  | 26.2                   | 13              | 24          | 23.5                   | 10              | 20          |
| E1BPX9           | LRPPRC        | Uncharacterized protein             | 158.23  | 26.8                   | 35              | 52          | 16.9                   | 25              | 44          |
| A5PJJ5           | LRRC14        | Leucine-rich repeat-containing      | 54.917  | 7.5                    | 3               | 4           | #N/A                   | #N/A            | #N/A        |

| Accession number | Gene symbol | Discription                                                   | MW(kDa) | Biological Replicate 1 |                 |             | Biological Replicate 2 |                 |             |
|------------------|-------------|---------------------------------------------------------------|---------|------------------------|-----------------|-------------|------------------------|-----------------|-------------|
|                  |             |                                                               |         | Sequence coverage(%)   | Unique peptides | MS/MS count | Sequence coverage(%)   | Unique peptides | MS/MS count |
| F1MMJ6           | LRRC16A     | Uncharacterized protein                                       | 147.36  | 3                      | 4               | 4           | #N/A                   | #N/A            | #N/A        |
| F1MHE7           | LRRC40      | Uncharacterized protein                                       | 68.431  | 17.1                   | 10              | 10          | 5.6                    | 4               | 7           |
| A6QR01           | LRRC47      | LRRC47 protein                                                | 63.635  | 6.7                    | 3               | 3           | #N/A                   | #N/A            | #N/A        |
| Q5E9X4           | LRRC59      | Leucine-rich repeat-containing                                | 34.879  | 36.3                   | 9               | 15          | 6.2                    | 2               | 4           |
| Q2T9W6           | LRRFIP2     | Leucine-rich repeat flightless-interacting protein 2          | 45.493  | #N/A                   | #N/A            | #N/A        | 5.2                    | 2               | 2           |
| Q08E63           | LRSAM1      | Leucine rich repeat and sterile alpha motif containing 1      | 83.666  | 3.9                    | 2               | 2           | #N/A                   | #N/A            | #N/A        |
| Q2YDM7           | LSG1        | Large subunit GTPase 1 homolog                                | 74.248  | #N/A                   | #N/A            | #N/A        | 3.1                    | 2               | 3           |
| Q5E9Z8           | LSM1        | U6 snRNA-associated Sm-like protein                           | 15.193  | 46.6                   | 5               | 9           | #N/A                   | #N/A            | #N/A        |
| Q0VCF9           | LSM12       | Protein LSM12 homolog                                         | 21.701  | #N/A                   | #N/A            | #N/A        | 6.7                    | 1               | 2           |
| Q3MHF8           | LSM14A      | Protein LSM14 homolog A                                       | 50.635  | 10.2                   | 5               | 8           | 4.8                    | 3               | 3           |
| A6QQV3           | LSM2        | LSM2 protein                                                  | 10.834  | 46.3                   | 4               | 7           | 20                     | 1               | 1           |
| Q32PE9           | LSM3        | U6 snRNA-associated Sm-like protein                           | 11.845  | 25.5                   | 3               | 5           | 17.6                   | 2               | 10          |
| Q3ZBK6           | LSM4        | U6 snRNA-associated Sm-like protein                           | 15.35   | 31.7                   | 5               | 14          | 13.7                   | 2               | 2           |
| Q148G9           | LSM6        | LSM6 homolog, U6 small nuclear RNA associated (S. cerevisiae) | 9.1275  | 46.2                   | 4               | 6           | 23.8                   | 2               | 6           |
| F1N6T3           | LSM7        | Uncharacterized protein                                       | 11.602  | 39.8                   | 3               | 6           | 14.6                   | 2               | 2           |
| Q3ZCE0           | LSM8        | N-alpha-acetyltransferase 38, NatC auxiliary subunit          | 10.403  | 36.5                   | 3               | 5           | 27.1                   | 2               | 2           |
| P84466           | LSS         | Lanosterol synthase                                           | 83.183  | 23.2                   | 14              | 25          | 14.8                   | 11              | 28          |
| Q0VCO6           | LTV1        | Protein LTV1 homolog                                          | 54.787  | 1.7                    | 1               | 1           | #N/A                   | #N/A            | #N/A        |
| F1MYQ8           | LUC7L2      | Uncharacterized protein                                       | 46.522  | #N/A                   | #N/A            | #N/A        | 3.8                    | 1               | 1           |
| Q3MHRO           | LYPLA1      | Acyl-protein thioesterase 1                                   | 24.595  | 25.2                   | 4               | 5           | 13.5                   | 3               | 3           |
| F1N7F4           | LYPLA2      | Uncharacterized protein                                       | 6.205   | 44.1                   | 1               | 1           | #N/A                   | #N/A            | #N/A        |
| A5PK90           | LYPLAL1     | LYPLAL1 protein                                               | 25.621  | 10.8                   | 2               | 4           | #N/A                   | #N/A            | #N/A        |
| E1BFE1           | LYRM1       | Uncharacterized protein                                       | 14.315  | 20.5                   | 3               | 5           | 21.3                   | 3               | 4           |
| Q0VCG0           | LYRM4       | LYR motif-containing protein 4                                | 10.711  | 15.4                   | 1               | 4           | 42.9                   | 4               | 8           |
| Q0VCRO           | LYRM5       | LYR motif-containing protein 5                                | 10.704  | 10.2                   | 1               | 2           | #N/A                   | #N/A            | #N/A        |
| P11456           | M6PR        | Cation-dependent mannose-6-phosphate receptor                 | 31.201  | 11.5                   | 2               | 3           | 11.1                   | 3               | 7           |
| Q3SX32           | M6PRBP1     | Perilipin                                                     | 47.602  | 39                     | 13              | 31          | 21.2                   | 9               | 21          |



| Accession number | Gene symbol | Discription                                            | MW(kDa) | Biological Replicate 1 |                 |             | Biological Replicate 2 |                 |             |
|------------------|-------------|--------------------------------------------------------|---------|------------------------|-----------------|-------------|------------------------|-----------------|-------------|
|                  |             |                                                        |         | Sequence coverage(%)   | Unique peptides | MS/MS count | Sequence coverage(%)   | Unique peptides | MS/MS count |
| Q0VC55           | MAPRE3      | Microtubule-associated protein, RP/EB family, member 3 | 30.394  | 11.3                   | 1               | 2           | #N/A                   | #N/A            | #N/A        |
| G5E5D4           | MARK1       | Uncharacterized protein                                | 87.933  | 5.6                    | 0               | 1           | 6                      | 3               | 6           |
| A6QNL2           | MARK2       | MARK2 protein                                          | 77.576  | #N/A                   | #N/A            | #N/A        | 6.5                    | 3               | 3           |
| F1MAZ8           | MARK3       | Uncharacterized protein                                | 88.943  | 11.8                   | 4               | 13          | #N/A                   | #N/A            | #N/A        |
| Q2T9L8           | MARS        | Methionine--tRNA ligase,                               | 100.63  | 18.7                   | 13              | 24          | 8.8                    | 8               | 15          |
| A6H7E1           | MARS2       | Methionine--tRNA ligase,                               | 66.647  | 10.3                   | 6               | 7           | 4.9                    | 3               | 4           |
| G5E5K2           | MASTL       | Serine/threonine-protein kinase                        | 97.715  | 2.7                    | 1               | 1           | #N/A                   | #N/A            | #N/A        |
| A7E3T7           | MAT2A       | S-adenosylmethionine synthase                          | 43.69   | 37.5                   | 11              | 21          | 20.3                   | 8               | 14          |
| Q29RI9           | MAT2B       | Methionine adenosyltransferase 2 subunit beta          | 37.768  | 26.6                   | 8               | 9           | 2.7                    | 1               | 2           |
| F1MXI4           | MATR3       | Uncharacterized protein                                | 93.823  | 3.8                    | 2               | 2           | #N/A                   | #N/A            | #N/A        |
| F1MU42           | MAVS        | Uncharacterized protein                                | 55.144  | #N/A                   | #N/A            | #N/A        | 2.3                    | 1               | 1           |
| E1B9A3           | MB21D2      | Uncharacterized protein                                | 48.635  | 39                     | 13              | 31          | 6.5                    | 4               | 10          |
| Q0VCY6           | MBOAT7      | Lysophospholipid acyltransferase 7                     | 52.764  | 7.4                    | 3               | 3           | 2.5                    | 1               | 2           |
| A5PJY3           | MCART1      | MCART1 protein                                         | 33.956  | 9.4                    | 2               | 2           | 3                      | 1               | 2           |
| E1BPG0           | MCAT        | Uncharacterized protein                                | 42.223  | 30.7                   | 9               | 15          | 8.3                    | 3               | 6           |
| E1BGC1           | MCCC1       | Uncharacterized protein                                | 80.482  | #N/A                   | #N/A            | #N/A        | 2.2                    | 2               | 2           |
| G3N1Q0           | MCCC2       | Uncharacterized protein                                | 33.244  | 4.2                    | 1               | 1           | #N/A                   | #N/A            | #N/A        |
| F1N506           | MCM2        | Uncharacterized protein (Fragment)                     | 100.65  | 26.9                   | 19              | 40          | 8.2                    | 7               | 9           |
| G3X6V0           | MCM3        | DNA replication licensing factor                       | 90.875  | 25.6                   | 21              | 31          | 12                     | 10              | 18          |
| E1BLY2           | MCM4        | Uncharacterized protein                                | 42.381  | 17.6                   | 5               | 10          | 9.9                    | 4               | 6           |
| Q0V8B7           | MCM5        | DNA replication licensing factor                       | 82.145  | 20.2                   | 14              | 20          | 9.7                    | 8               | 14          |
| Q3ZBH9           | MCM7        | DNA replication licensing factor                       | 81.314  | 39.9                   | 22              | 38          | 12.8                   | 9               | 14          |
| E1BPX4           | MCM8        | DNA helicase MCM8                                      | 90.767  | 0.9                    | 1               | 1           | #N/A                   | #N/A            | #N/A        |
| F1MDL6           | MCU         | Uncharacterized protein (Fragment)                     | 32.399  | 40.1                   | 8               | 17          | 9                      | 2               | 5           |
| Q3T145           | MDH1        | Malate dehydrogenase, cytoplasmic                      | 36.438  | 53.6                   | 20              | 76          | 34.7                   | 13              | 47          |
| Q32LG3           | MDH2        | Malate dehydrogenase, mitochondrial                    | 35.668  | 71.6                   | 25              | 170         | 61.8                   | 18              | 157         |
| Q58DB8           | MDS018      | Phosphopantothoenoylcysteine                           | 25.18   | 43.9                   | 9               | 22          | 9.1                    | 3               | 6           |
| F1N3V0           | ME1         | Malic enzyme                                           | 63.786  | 52.9                   | 24              | 144         | 18.1                   | 10              | 49          |
| Q08DM3           | ME2         | Malic enzyme                                           | 65.412  | 62.2                   | 27              | 89          | 27.2                   | 15              | 54          |
| F1MPH4           | ME3         | Malic enzyme                                           | 66.6    | 19.7                   | 8               | 17          | 7.6                    | 4               | 10          |

| Accession number | Gene symbol | Discription                                                | MW(kDa) | Biological Replicate 1 |                 |             | Biological Replicate 2 |                 |             |
|------------------|-------------|------------------------------------------------------------|---------|------------------------|-----------------|-------------|------------------------|-----------------|-------------|
|                  |             |                                                            |         | Sequence coverage(%)   | Unique peptides | MS/MS count | Sequence coverage(%)   | Unique peptides | MS/MS count |
| A9Q1J5           | MELK        | Maternal embryonic leucine zipper                          | 74.251  | 2.8                    | 2               | 2           | #N/A                   | #N/A            | #N/A        |
| Q3TOU1           | MESDC2      | LDLR chaperone MESD                                        | 25.976  | 40.5                   | 9               | 18          | 6.5                    | 2               | 6           |
| F1MZU5           | MEST        | Mesoderm-specific transcript homolog protein               | 38.793  | 16.1                   | 4               | 7           | #N/A                   | #N/A            | #N/A        |
| A6QLA4           | METAP1      | Methionine aminopeptidase 1                                | 43.183  | 2.1                    | 1               | 1           | #N/A                   | #N/A            | #N/A        |
| Q3ZC89           | METAP2      | Methionine aminopeptidase 2                                | 52.811  | 20.8                   | 7               | 9           | 5.5                    | 3               | 6           |
| A5PK19           | METTL13     | Methyltransferase-like protein 13                          | 78.75   | 1.3                    | 1               | 2           | #N/A                   | #N/A            | #N/A        |
| F1ML61           | METTL22     | Uncharacterized protein                                    | 39.046  | 5.1                    | 1               | 2           | #N/A                   | #N/A            | #N/A        |
| E1BLP4           | MF          | Mitochondrial fission factor                               | 38.53   | 27.2                   | 1               | 7           | #N/A                   | #N/A            | #N/A        |
| Q95114           | MFGE8       | Lactadherin                                                | 47.41   | 51.5                   | 25              | 206         | 44                     | 20              | 141         |
| F1MPL1           | MFN1        | Uncharacterized protein (Fragment)                         | 85.2    | #N/A                   | #N/A            | #N/A        | 1.2                    | 1               | 1           |
| E1BKT8           | MFN2        | Uncharacterized protein                                    | 87.628  | 11.4                   | 8               | 13          | 11.2                   | 9               | 17          |
| Q1JQC1           | MFSD1       | Major facilitator superfamily domain-containing protein 1  | 51.537  | #N/A                   | #N/A            | #N/A        | 2.6                    | 1               | 2           |
| Q0P5M9           | MFSD10      | Major facilitator superfamily domain-containing protein 10 | 48.143  | 8.3                    | 3               | 4           | 2                      | 1               | 1           |
| E1BPY5           | MFSD8       | Uncharacterized protein                                    | 57.792  | 11.6                   | 4               | 7           | 2.3                    | 1               | 2           |
| E1BAZ5           | MFSD9       | Uncharacterized protein                                    | 50.51   | #N/A                   | #N/A            | #N/A        | 1.4                    | 1               | 2           |
| Q5E9I4           | MGAT1       | MGAT1 protein                                              | 51.702  | 8.1                    | 3               | 7           | 4                      | 2               | 2           |
| 077836           | MGAT4A      | Alpha-1,3-mannosyl-glycoprotein 4-beta-N-                  | 61.617  | 5.2                    | 3               | 3           | 6.4                    | 3               | 5           |
| F1N6U2           | MGAT4B      | Uncharacterized protein (Fragment)                         | 51.21   | 2                      | 1               | 1           | #N/A                   | #N/A            | #N/A        |
| E1BMM2           | MGAT5       | Uncharacterized protein                                    | 84.389  | 3.2                    | 3               | 3           | #N/A                   | #N/A            | #N/A        |
| Q3T0T9           | MGC127133   | 20-beta-hydroxysteroid                                     | 31.707  | 17.5                   | 1               | 5           | #N/A                   | #N/A            | #N/A        |
| Q32P60           | MGC133632   | MGC133632 protein                                          | 8.4977  | 17.1                   | 1               | 2           | #N/A                   | #N/A            | #N/A        |
| Q2KIJ4           | MGC137058   | Hypothetical LOC540154                                     | 42.2    | #N/A                   | #N/A            | #N/A        | 2.8                    | 1               | 1           |
| Q05B90           | MGC139698   | Hypothetical LOC512024                                     | 18.325  | 5.2                    | 1               | 2           | 5.2                    | 1               | 3           |
| Q08DN5           | MGC142781   | Carnitine acetyltransferase                                | 71.016  | 37.1                   | 22              | 44          | 21.7                   | 13              | 33          |
| A6QLS5           | MGC143209   | MGC143209 protein                                          | 41.837  | 29.1                   | 10              | 21          | 5.4                    | 2               | 6           |
| F1MW73           | MGC148692   | Uncharacterized protein                                    | 138.44  | 6.4                    | 7               | 9           | 1.3                    | 1               | 2           |
| A6QNZ5           | MGC151537   | MGC151537 protein                                          | 86.26   | 1.4                    | 1               | 1           | #N/A                   | #N/A            | #N/A        |
| A6QPV5           | MGC157319   | MGC157319 protein                                          | 62.761  | 1.4                    | 1               | 1           | #N/A                   | #N/A            | #N/A        |

| Accession number | Gene symbol | Discription                                              | MW(kDa) | Biological Replicate 1 |                 |             | Biological Replicate 2 |                 |             |
|------------------|-------------|----------------------------------------------------------|---------|------------------------|-----------------|-------------|------------------------|-----------------|-------------|
|                  |             |                                                          |         | Sequence coverage(%)   | Unique peptides | MS/MS count | Sequence coverage(%)   | Unique peptides | MS/MS count |
| A5PK88           | MGC159500   | MGC159500 protein                                        | 24.116  | 71.1                   | 13              | 33          | 30.8                   | 8               | 19          |
| A5PJL7           | MGC160092   | MGC160092 protein                                        | 45.999  | 5.3                    | 2               | 2           | #N/A                   | #N/A            | #N/A        |
| A5PK67           | MGC165862   | MGC165862 protein                                        | 9.6072  | 9.6                    | 1               | 1           | #N/A                   | #N/A            | #N/A        |
| Q58D67           | MGC3248     | Dynactin 4                                               | 17.797  | #N/A                   | #N/A            | #N/A        | 11                     | 2               | 3           |
| E1BQ16           | MGEA5       | Uncharacterized protein                                  | 102.88  | 9.1                    | 9               | 14          | 2                      | 2               | 2           |
| F6Q192           | MGME1       | Mitochondrial genome maintenance exonuclease 1           | 39.224  | 25.1                   | 7               | 11          | 11.1                   | 4               | 7           |
| I6L9J6           | MGRN1       | MGRN1 protein                                            | 43.4    | #N/A                   | #N/A            | #N/A        | 2.6                    | 1               | 2           |
| Q2KJG4           | MGST2       | Microsomal glutathione S-                                | 16.483  | 9.6                    | 1               | 4           | 9.6                    | 1               | 1           |
| Q3T100           | MGST3       | Microsomal glutathione S-                                | 16.884  | 13.8                   | 2               | 7           | 13.8                   | 2               | 6           |
| G5E5L5           | MIA3        | Melanoma inhibitory activity protein 3 (Fragment)        | 206.76  | 1.2                    | 2               | 2           | #N/A                   | #N/A            | #N/A        |
| F1MH07           | MICAL1      | Protein-methionine sulfoxide oxidase MICAL1              | 118.69  | 34.3                   | 32              | 77          | 13                     | 15              | 43          |
| F1MF74           | MICAL2      | Protein-methionine sulfoxide oxidase MICAL2              | 124.01  | 8.1                    | 8               | 11          | 2.7                    | 3               | 6           |
| E1BIT2           | MIEF1       | Uncharacterized protein                                  | 51.117  | 4.1                    | 2               | 2           | 6.5                    | 3               | 5           |
| P80177           | MIF         | Macrophage migration inhibitory                          | 12.343  | 23.5                   | 3               | 22          | 15.7                   | 2               | 2           |
| Q5EA24           | MINA        | Bifunctional lysine-specific demethylase and histidyl-   | 52.454  | 13.4                   | 6               | 8           | #N/A                   | #N/A            | #N/A        |
| F6Q3P6           | MINK1       | Uncharacterized protein                                  | 147.35  | 1.1                    | 2               | 2           | #N/A                   | #N/A            | #N/A        |
| Q2TBT6           | MINPP1      | Multiple inositol polyphosphate histidine phosphatase, 1 | 41.434  | 4.9                    | 2               | 2           | 2.7                    | 1               | 1           |
| E1B899           | MIOS        | Uncharacterized protein                                  | 98.514  | 8.5                    | 7               | 10          | 9.5                    | 8               | 12          |
| F1MX73           | MIPEP       | Uncharacterized protein (Fragment)                       | 81.094  | 2.2                    | 1               | 1           | 5.5                    | 4               | 4           |
| F1N1A8           | MKNK1       | MAP kinase-interacting serine/threonine-protein kinase 1 | 36.421  | 3.7                    | 1               | 1           | #N/A                   | #N/A            | #N/A        |
| F6QQR5           | MKRN2       | Uncharacterized protein (Fragment)                       | 34.215  | #N/A                   | #N/A            | #N/A        | 3.2                    | 1               | 1           |
| A6H797           | MLEC        | MLEC protein                                             | 31.566  | 44.5                   | 11              | 34          | 40.6                   | 11              | 69          |
| F1N2X7           | MLLT4       | Uncharacterized protein (Fragment)                       | 197.98  | 1                      | 1               | 1           | #N/A                   | #N/A            | #N/A        |
| Q17QU5           | MLST8       | Target of rapamycin complex subunit                      | 35.92   | 5.5                    | 1               | 1           | #N/A                   | #N/A            | #N/A        |
| A5PJC5           | MLYCD       | MLYCD protein                                            | 55.415  | 12.4                   | 4               | 7           | 7.8                    | 3               | 5           |

| Accession number | Gene symbol | Discription                                                      | MW(kDa) | Biological Replicate 1 |                 |             | Biological Replicate 2 |                 |             |
|------------------|-------------|------------------------------------------------------------------|---------|------------------------|-----------------|-------------|------------------------|-----------------|-------------|
|                  |             |                                                                  |         | Sequence coverage(%)   | Unique peptides | MS/MS count | Sequence coverage(%)   | Unique peptides | MS/MS count |
| A6QQK5           | MMAA        | MMAA protein                                                     | 46.687  | 2.4                    | 1               | 1           | 6.9                    | 3               | 4           |
| Q58D49           | MMAB        | Cob(I)yrinic acid a,c-diamide adenosyltransferase, mitochondrial | 26.587  | 21.2                   | 4               | 6           | 14.5                   | 3               | 4           |
| E1BP36           | MMS19       | MMS19 nucleotide excision repair protein homolog                 | 113.11  | 16                     | 15              | 27          | 7.7                    | 8               | 13          |
| Q58D63           | MOB3A       | MOB kinase activator 3A                                          | 25.41   | 4.1                    | 1               | 1           | #N/A                   | #N/A            | #N/A        |
| Q0VCJ5           | MOBKL1B     | MOB1, Mps One Binder kinase activator-like 1B (Yeast)            | 25.079  | 10.6                   | 2               | 2           | #N/A                   | #N/A            | #N/A        |
| A4FUE6           | MOBKL3      | MOBKL3 protein                                                   | 26.032  | #N/A                   | #N/A            | #N/A        | 13.8                   | 3               | 6           |
| Q1JQD7           | MOCS1       | Molybdenum cofactor biosynthesis                                 | 69.658  | 6.8                    | 4               | 8           | 4.4                    | 3               | 5           |
| Q70VZ7           | MOGAT1      | 2-acylglycerol 0-acyltransferase 1                               | 39.109  | 26                     | 7               | 13          | 3.3                    | 1               | 2           |
| E1B7U1           | MOGS        | Uncharacterized protein (Fragment)                               | 79.861  | 11.1                   | 7               | 11          | 11.2                   | 8               | 15          |
| E1BP17           | MON2        | Uncharacterized protein                                          | 190.07  | 13                     | 21              | 38          | 4.7                    | 9               | 15          |
| F1MFY1           | MORC3       | Uncharacterized protein (Fragment)                               | 109.19  | 2.6                    | 2               | 2           | #N/A                   | #N/A            | #N/A        |
| A6QQK3           | MOSPD2      | MOSPD2 protein                                                   | 56.376  | 16.7                   | 10              | 15          | #N/A                   | #N/A            | #N/A        |
| Q3ZCG2           | MPC1        | Mitochondrial pyruvate carrier 1                                 | 12.388  | #N/A                   | #N/A            | #N/A        | 6.4                    | 1               | 1           |
| Q148D6           | MPDU1       | Mannose-P-dolichol utilization                                   | 26.584  | 5.7                    | 1               | 3           | #N/A                   | #N/A            | #N/A        |
| F1MZT3           | MPHOSPH9    | Uncharacterized protein                                          | 115.93  | 10.9                   | 8               | 10          | 2.2                    | 3               | 5           |
| Q3SZI0           | MPI         | Mannose-6-phosphate isomerase                                    | 46.368  | 8.3                    | 3               | 3           | #N/A                   | #N/A            | #N/A        |
| F1MYW5           | MPND        | Uncharacterized protein (Fragment)                               | 53.725  | 19.8                   | 7               | 10          | 7.5                    | 4               | 7           |
| E1BIQ8           | MPP5        | Uncharacterized protein                                          | 77.199  | 1.3                    | 1               | 1           | #N/A                   | #N/A            | #N/A        |
| F1MU05           | MPP6        | Uncharacterized protein (Fragment)                               | 62.312  | 16                     | 8               | 10          | #N/A                   | #N/A            | #N/A        |
| Q3MHG3           | MPST        | Mercaptopyruvate sulfurtransferase                               | 33.192  | 26.6                   | 7               | 13          | 21.9                   | 6               | 13          |
| E1BIN9           | MRE11A      | Uncharacterized protein                                          | 80.534  | 1.8                    | 1               | 1           | #N/A                   | #N/A            | #N/A        |
| Q2NL31           | MRI1        | Methylthioribose-1-phosphate                                     | 37.826  | 4.5                    | 1               | 1           | #N/A                   | #N/A            | #N/A        |
| A7MBD2           | MRM1        | MRM1 protein                                                     | 38.923  | #N/A                   | #N/A            | #N/A        | 3.1                    | 1               | 2           |
| A6QPQ5           | MRPL1       | 39S ribosomal protein L1,                                        | 36.656  | #N/A                   | #N/A            | #N/A        | 5.2                    | 2               | 2           |
| F1MBS4           | MRPL12      | 39S ribosomal protein L12, mitochondrial (Fragment)              | 32.175  | 50.8                   | 14              | 36          | 34.7                   | 10              | 51          |
| Q3ZBR7           | MRPL18      | 39S ribosomal protein L18,                                       | 20.396  | 5                      | 1               | 1           | 5                      | 1               | 1           |
| Q2TBR2           | MRPL20      | 39S ribosomal protein L20,                                       | 17.534  | 10.7                   | 2               | 2           | 12.1                   | 2               | 5           |
| Q2TBS2           | MRPL21      | 39S ribosomal protein L21,                                       | 23.183  | 4.8                    | 1               | 1           | 8.1                    | 2               | 5           |



| Accession number | Gene symbol | Discription                         | MW(kDa) | Biological Replicate 1 |                 |             | Biological Replicate 2 |                 |             |
|------------------|-------------|-------------------------------------|---------|------------------------|-----------------|-------------|------------------------|-----------------|-------------|
|                  |             |                                     |         | Sequence coverage(%)   | Unique peptides | MS/MS count | Sequence coverage(%)   | Unique peptides | MS/MS count |
| Q3SZX5           | MRPL22      | 39S ribosomal protein L22,          | 23.551  | 7.4                    | 2               | 2           | 9.3                    | 2               | 2           |
| Q3ZBF3           | MRPL38      | 39S ribosomal protein L38,          | 44.622  | #N/A                   | #N/A            | #N/A        | 5.5                    | 2               | 5           |
| Q05B74           | MRPL39      | Mitochondrial ribosomal protein L39 | 38.459  | 9.3                    | 3               | 3           | #N/A                   | #N/A            | #N/A        |
| P82927           | MRPL42      | 39S ribosomal protein L42,          | 16.637  | 7                      | 1               | 1           | #N/A                   | #N/A            | #N/A        |
| Q2KIS2           | MRPL44      | 39S ribosomal protein L44,          | 37.412  | 3.9                    | 1               | 1           | #N/A                   | #N/A            | #N/A        |
| P82670           | MRPS10      | 28S ribosomal protein S10,          | 23.031  | 12.9                   | 2               | 2           | #N/A                   | #N/A            | #N/A        |
| Q6B860           | MRPS14      | 28S ribosomal protein S14,          | 15.043  | 11.7                   | 1               | 4           | #N/A                   | #N/A            | #N/A        |
| P82915           | MRPS16      | 28S ribosomal protein S16,          | 15.131  | 15.6                   | 2               | 2           | #N/A                   | #N/A            | #N/A        |
| P82916           | MRPS17      | 28S ribosomal protein S17,          | 14.474  | 13.8                   | 2               | 3           | 23.8                   | 3               | 8           |
| P82669           | MRPS25      | 28S ribosomal protein S25,          | 20.055  | 27.7                   | 3               | 4           | 5.2                    | 1               | 2           |
| Q3SZ86           | MRPS26      | 28S ribosomal protein S26,          | 23.774  | 16.1                   | 3               | 8           | 31.2                   | 6               | 9           |
| Q32PI8           | MRPS27      | 28S ribosomal protein S27,          | 47.954  | 4.6                    | 2               | 4           | #N/A                   | #N/A            | #N/A        |
| P82924           | MRPS30      | 28S ribosomal protein S30,          | 49.355  | 3.4                    | 1               | 1           | #N/A                   | #N/A            | #N/A        |
| P82908           | MRPS36      | 28S ribosomal protein S36,          | 11.543  | 52.4                   | 5               | 12          | 39.8                   | 3               | 6           |
| F1NM3            | MRS2        | Uncharacterized protein             | 50.52   | 8.4                    | 4               | 6           | #N/A                   | #N/A            | #N/A        |
| Q3MHE4           | MSH2        | DNA mismatch repair protein Msh2    | 104.92  | 12.2                   | 11              | 14          | 5.1                    | 6               | 9           |
| F1MLH1           | MSH3        | Uncharacterized protein             | 126.07  | 0.8                    | 1               | 1           | 0.8                    | 1               | 4           |
| E1B9Q4           | MSH6        | Uncharacterized protein             | 152.52  | 2.2                    | 3               | 3           | #N/A                   | #N/A            | #N/A        |
| Q2HJ49           | MSN         | Moesin                              | 67.974  | 67.8                   | 34              | 91          | 39                     | 23              | 58          |
| F1MGJ1           | MSRB2       | Uncharacterized protein             | 19.785  | 3.3                    | 1               | 1           | #N/A                   | #N/A            | #N/A        |
| A5D9D4           | MSTO1       | Protein misato homolog 1            | 62.275  | 3.3                    | 2               | 3           | #N/A                   | #N/A            | #N/A        |
| P37359           | MT3         | Metallothionein-3                   | 6.937   | #N/A                   | #N/A            | #N/A        | 33.8                   | 3               | 5           |
| Q3MHF7           | MTAP        | S-methyl-5-thioadenosine            | 31.256  | 57.6                   | 12              | 22          | 19.8                   | 5               | 14          |
| A7YY65           | MTCH1       | MTCH1 protein                       | 41.517  | 37.3                   | 13              | 38          | 23.9                   | 10              | 30          |
| Q9N285           | MTCH2       | Mitochondrial carrier homolog 2     | 33.294  | 17.5                   | 5               | 12          | 7.3                    | 3               | 7           |
| P00396           | MTCO1       | Cytochrome c oxidase subunit 1      | 57.032  | 1.6                    | 1               | 4           | #N/A                   | #N/A            | #N/A        |
| P68530           | MTCO2       | Cytochrome c oxidase subunit 2      | 26.021  | 26.4                   | 5               | 22          | 6.2                    | 2               | 4           |
| P00157           | MTCYB       | Cytochrome b                        | 42.59   | 4.2                    | 3               | 4           | #N/A                   | #N/A            | #N/A        |
| Q24JZ4           | MTDH        | Metadherin                          | 64.054  | 2.7                    | 1               | 1           | 3.3                    | 1               | 1           |
| Q3SZL7           | MTFR1       | Mitochondrial fission regulator 1   | 36.824  | 7.4                    | 3               | 4           | #N/A                   | #N/A            | #N/A        |
| Q3ZBW7           | MTFR1L      | Mitochondrial fission regulator 1-  | 31.712  | 12.5                   | 3               | 7           | 6.6                    | 2               | 3           |
| A4FUDO           | MTHFD1      | MTHFD1 protein                      | 101.18  | 67.2                   | 57              | 260         | 41.1                   | 41              | 197         |

| Accession number | Gene symbol | Discription                                                          | MW(kDa) | Biological Replicate 1 |                 |             | Biological Replicate 2 |                 |             |
|------------------|-------------|----------------------------------------------------------------------|---------|------------------------|-----------------|-------------|------------------------|-----------------|-------------|
|                  |             |                                                                      |         | Sequence coverage(%)   | Unique peptides | MS/MS count | Sequence coverage(%)   | Unique peptides | MS/MS count |
| E1B884           | MTHFD1L     | Monofunctional C1-tetrahydrofolate synthase, mitochondrial           | 102.75  | #N/A                   | #N/A            | #N/A        | 2.5                    | 1               | 1           |
| Q0P5C2           | MTHFD2      | Bifunctional methylenetetrahydrofolate dehydrogenase/cyclohydrolase, | 37.766  | #N/A                   | #N/A            | #N/A        | 7.7                    | 2               | 3           |
| E1BNJ2           | MTHFD2L     | Uncharacterized protein                                              | 37.452  | 4                      | 2               | 2           | #N/A                   | #N/A            | #N/A        |
| Q5I598           | MTHFR       | Methylenetetrahydrofolate reductase                                  | 74.485  | 1.7                    | 1               | 2           | #N/A                   | #N/A            | #N/A        |
| A6QLT4           | MTM1        | Myotubularin                                                         | 70.019  | 7.8                    | 3               | 3           | #N/A                   | #N/A            | #N/A        |
| E1BFE6           | MTMR1       | Uncharacterized protein                                              | 76.565  | 5.6                    | 1               | 1           | #N/A                   | #N/A            | #N/A        |
| E1BNH5           | MTMR12      | Uncharacterized protein                                              | 85.842  | 6.3                    | 4               | 6           | 2.5                    | 2               | 2           |
| A6QLE9           | MTMR14      | MTMR14 protein                                                       | 66.606  | 12.4                   | 6               | 7           | #N/A                   | #N/A            | #N/A        |
| F1MMI7           | MTMR2       | Myotubularin-related protein 2                                       | 70.715  | 17.2                   | 7               | 10          | 3.6                    | 2               | 3           |
| F1MFT9           | MTMR3       | Uncharacterized protein                                              | 122.96  | 17.1                   | 16              | 25          | 8.9                    | 10              | 21          |
| E1BJH8           | MTMR6       | Uncharacterized protein                                              | 70.116  | #N/A                   | #N/A            | #N/A        | 2                      | 1               | 2           |
| E1BEV2           | MTMR7       | Uncharacterized protein                                              | 75.906  | 4.5                    | 3               | 4           | 3                      | 2               | 3           |
| A7MB43           | MTMR9       | MTMR9 protein                                                        | 63.485  | 5.5                    | 3               | 3           | 2.7                    | 2               | 2           |
| Q1JQB6           | MT01        | Mitochondrial translation optimization 1 homolog (S.                 | 77.272  | 2.7                    | 2               | 2           | 5.5                    | 4               | 5           |
| F1MSM5           | MTPAP       | Uncharacterized protein                                              | 65.345  | 9.1                    | 5               | 6           | 4.8                    | 2               | 4           |
| Q3TOF7           | MTPN        | Myotrophin                                                           | 12.895  | 31.4                   | 3               | 9           | 33.1                   | 3               | 4           |
| Q4JIJ3           | MTR         | Methionine synthase                                                  | 140.48  | 10.6                   | 10              | 13          | 3.6                    | 5               | 10          |
| E1BP52           | MTSS1       | Uncharacterized protein                                              | 82.343  | #N/A                   | #N/A            | #N/A        | 1.5                    | 1               | 1           |
| F1MGT3           | MTSS1L      | Uncharacterized protein (Fragment)                                   | 75.722  | 3.1                    | 1               | 1           | #N/A                   | #N/A            | #N/A        |
| Q2TBS1           | MTX1        | Metaxin-1                                                            | 35.674  | 7.3                    | 3               | 3           | 6.9                    | 3               | 3           |
| A6QLL2           | MTX2        | MTX2 protein                                                         | 29.679  | 22.3                   | 6               | 10          | 18.6                   | 5               | 10          |
| F1MRE1           | MTX3        | Uncharacterized protein                                              | 35.133  | 9.3                    | 3               | 6           | 11.2                   | 4               | 8           |
| E1BGD5           | MUL1        | Uncharacterized protein                                              | 39.612  | 8.9                    | 2               | 2           | 2.3                    | 1               | 1           |
| Q9GK13           | MUT         | Methylmalonyl-CoA mutase,                                            | 83.234  | 10.3                   | 7               | 15          | 8                      | 6               | 8           |
| Q5E9T8           | MVK         | Mevalonate kinase                                                    | 42.07   | 21                     | 7               | 10          | 9.8                    | 3               | 5           |
| F1MNN6           | MVP         | Major vault protein                                                  | 98.953  | 67.3                   | 69              | 2241        | 65.4                   | 65              | 1674        |
| E1BKX3           | MYBBP1A     | Uncharacterized protein                                              | 152.04  | 1.3                    | 2               | 3           | #N/A                   | #N/A            | #N/A        |
| Q2TBP7           | MYCBP       | C-Myc-binding protein                                                | 11.997  | #N/A                   | #N/A            | #N/A        | 19.4                   | 2               | 6           |

| Accession number | Gene symbol | Discription                                                  | MW(kDa) | Biological Replicate 1 |                 |             | Biological Replicate 2 |                 |             |
|------------------|-------------|--------------------------------------------------------------|---------|------------------------|-----------------|-------------|------------------------|-----------------|-------------|
|                  |             |                                                              |         | Sequence coverage(%)   | Unique peptides | MS/MS count | Sequence coverage(%)   | Unique peptides | MS/MS count |
| E1BH40           | MYCBP2      | Uncharacterized protein                                      | 510.3   | 0.3                    | 2               | 2           | 0.5                    | 3               | 4           |
| Q27991           | MYH10       | Myosin-10                                                    | 229.1   | 19.6                   | 27              | 61          | 9.6                    | 15              | 34          |
| F1MYM9           | MYH11       | Uncharacterized protein                                      | 227.66  | 4.5                    | 1               | 1           | #N/A                   | #N/A            | #N/A        |
| F1MU39           | MYH15       | Uncharacterized protein (Fragment)                           | 223.87  | 1.4                    | 3               | 4           | 0.5                    | 1               | 2           |
| F1MQ37           | MYH9        | Uncharacterized protein                                      | 227.1   | 11.8                   | 11              | 22          | 5.7                    | 7               | 11          |
| A0JNJ5           | MYL1        | Myosin light chain 1/3, skeletal muscle isoform              | 20.932  | #N/A                   | #N/A            | #N/A        | 8.3                    | 1               | 1           |
| A4IF97           | MYL12B      | Myosin regulatory light chain 12B                            | 19.692  | 40.4                   | 6               | 10          | 38                     | 6               | 12          |
| Q148H2           | MYL6B       | Myosin, light chain 6B, alkali, smooth muscle and non-muscle | 23.403  | #N/A                   | #N/A            | #N/A        | 11.4                   | 2               | 3           |
| Q28824           | MYLK        | Myosin light chain kinase, smooth                            | 128.82  | 0.7                    | 1               | 2           | #N/A                   | #N/A            | #N/A        |
| A6QLD6           | MYO1B       | MYO1B protein                                                | 131.83  | 14.4                   | 15              | 21          | 10.7                   | 13              | 23          |
| F1MHT3           | MYO5A       | Uncharacterized protein (Fragment)                           | 216.07  | 8.2                    | 9               | 12          | 8.3                    | 10              | 15          |
| F1MMQ6           | MYO5B       | Uncharacterized protein (Fragment)                           | 213.41  | 27.1                   | 42              | 80          | 11.3                   | 17              | 51          |
| F1MX93           | MYO5C       | Uncharacterized protein                                      | 205.62  | #N/A                   | #N/A            | #N/A        | 2.1                    | 2               | 2           |
| E1BPK6           | MYO6        | Uncharacterized protein                                      | 149.61  | 27.5                   | 33              | 60          | 12.1                   | 16              | 31          |
| G3N2Y8           | MYPN        | Uncharacterized protein (Fragment)                           | 95.002  | 3                      | 1               | 2           | #N/A                   | #N/A            | #N/A        |
| A5PJV8           | MZT2        | Mitotic-spindle organizing protein                           | 15.891  | #N/A                   | #N/A            | #N/A        | 8.9                    | 1               | 1           |
| A4FV35           | N6AMT1      | N6AMT1 protein                                               | 22.929  | 4.2                    | 1               | 1           | #N/A                   | #N/A            | #N/A        |
| Q2KI14           | NAA10       | N-alpha-acetyltransferase 10                                 | 26.52   | 12.3                   | 4               | 4           | #N/A                   | #N/A            | #N/A        |
| F1N4V5           | NAA15       | Uncharacterized protein                                      | 101.15  | 18.4                   | 15              | 28          | 6.8                    | 7               | 12          |
| E1BDK3           | NAA30       | Uncharacterized protein                                      | 38.661  | 9.7                    | 3               | 3           | #N/A                   | #N/A            | #N/A        |
| F1MJT0           | NAA35       | Uncharacterized protein                                      | 86.544  | 5.4                    | 5               | 6           | #N/A                   | #N/A            | #N/A        |
| Q0I1J0           | NAA50       | N-alpha-acetyltransferase 50                                 | 19.398  | 43.2                   | 6               | 9           | #N/A                   | #N/A            | #N/A        |
| A5D7P8           | NABP1       | SOSS complex subunit B2                                      | 22.449  | 4.4                    | 1               | 1           | #N/A                   | #N/A            | #N/A        |
| Q5E9A1           | NACA        | Nascent polypeptide-associated complex subunit alpha         | 23.37   | 18.6                   | 3               | 7           | 12.6                   | 2               | 2           |
| F1MV80           | NADK2       | Uncharacterized protein                                      | 52.42   | 58.2                   | 25              | 110         | 44                     | 18              | 121         |
| E1B8X4           | NAE1        | Uncharacterized protein                                      | 60.385  | 5.8                    | 3               | 5           | 1.7                    | 1               | 1           |
| Q58DH9           | NAGA        | Alpha-N-acetylgalactosaminidase                              | 46.532  | 10.7                   | 4               | 8           | 9.7                    | 4               | 8           |
| Q3SZM9           | NAGK        | N-acetyl-D-glucosamine kinase                                | 37.267  | 26.2                   | 8               | 18          | 11                     | 3               | 5           |
| A6QM01           | NAGLU       | NAGLU protein                                                | 74.075  | 6.7                    | 3               | 3           | #N/A                   | #N/A            | #N/A        |

| Accession number | Gene symbol | Discription                                                 | MW(kDa) | Biological Replicate 1 |                 |             | Biological Replicate 2 |                 |             |
|------------------|-------------|-------------------------------------------------------------|---------|------------------------|-----------------|-------------|------------------------|-----------------|-------------|
|                  |             |                                                             |         | Sequence coverage(%)   | Unique peptides | MS/MS count | Sequence coverage(%)   | Unique peptides | MS/MS count |
| G5E597           | NAGPA       | N-acetylglucosamine-1-phosphodiester alpha-N-               | 57.086  | 6.3                    | 3               | 3           | 2.9                    | 1               | 1           |
| A6H767           | NAP1L1      | Nucleosome assembly protein 1-like                          | 45.376  | 31.2                   | 10              | 40          | 11.8                   | 3               | 7           |
| Q2TA40           | NAP1L4      | Nucleosome assembly protein 1-like                          | 43.985  | 23.3                   | 6               | 22          | 14.8                   | 3               | 5           |
| Q58CN9           | NAPEPLD     | N-acyl-phosphatidylethanolamine-hydrolyzing phospholipase D | 45.341  | 8.9                    | 3               | 6           | #N/A                   | #N/A            | #N/A        |
| P81127           | NAPG        | Gamma-soluble NSF attachment                                | 34.636  | 17.6                   | 5               | 8           | 16.7                   | 5               | 12          |
| A4FV58           | NARFL       | Cytosolic Fe-S cluster assembly factor NARFL                | 52.605  | #N/A                   | #N/A            | #N/A        | 1.7                    | 1               | 3           |
| Q2KJG3           | NARS        | Asparagine--tRNA ligase,                                    | 64.398  | 37.9                   | 18              | 29          | 3.4                    | 2               | 2           |
| F6QRZ3           | NARS2       | Uncharacterized protein                                     | 53.794  | 2.5                    | 1               | 1           | #N/A                   | #N/A            | #N/A        |
| Q2T9P4           | NASP        | Nuclear autoantigenic sperm protein                         | 83.687  | 39.9                   | 27              | 94          | 21                     | 18              | 55          |
| Q3MHZ1           | NAT14       | N-acetyltransferase 14                                      | 21.733  | 14.6                   | 2               | 3           | 3.9                    | 1               | 1           |
| F1MPS0           | NCAPD3      | Uncharacterized protein                                     | 166.48  | 0.7                    | 1               | 1           | #N/A                   | #N/A            | #N/A        |
| F1MUI7           | NCAPG       | Uncharacterized protein                                     | 114.9   | 11.3                   | 11              | 16          | 7.5                    | 7               | 15          |
| F1MH70           | NCAPH       | Condensin complex subunit 2                                 | 80.693  | 2.5                    | 2               | 2           | 4.8                    | 4               | 7           |
| E1BMM0           | NCBP1       | Uncharacterized protein (Fragment)                          | 91.852  | 15.6                   | 9               | 9           | #N/A                   | #N/A            | #N/A        |
| O77774           | NCF1        | Neutrophil cytosol factor 1                                 | 45.345  | 2                      | 1               | 2           | #N/A                   | #N/A            | #N/A        |
| Q1LZB2           | NCK1        | NCK adaptor protein 1                                       | 42.905  | 18                     | 5               | 5           | 6.4                    | 2               | 3           |
| A6H720           | NCK2        | NCK2 protein                                                | 41.911  | 29                     | 9               | 18          | 11.7                   | 4               | 9           |
| F1MPZ9           | NCKAP1      | Uncharacterized protein (Fragment)                          | 124.89  | 13.7                   | 13              | 15          | 9.5                    | 12              | 16          |
| E1B876           | NCKAP1L     | Uncharacterized protein                                     | 128.87  | 0.6                    | 1               | 2           | #N/A                   | #N/A            | #N/A        |
| E1BG80           | NCKIPSD     | Uncharacterized protein                                     | 79.585  | 5.1                    | 4               | 4           | #N/A                   | #N/A            | #N/A        |
| E1B8K6           | NCL         | Uncharacterized protein                                     | 77.852  | 30.6                   | 22              | 45          | 25.1                   | 21              | 55          |
| Q1LZC3           | NCLN        | Nicalin homolog (Zebrafish)                                 | 63.108  | 38.8                   | 22              | 52          | 26.3                   | 15              | 40          |
| F1MT12           | NCSTN       | Uncharacterized protein                                     | 79.086  | 11.6                   | 8               | 16          | 4.6                    | 4               | 12          |
| Q6QTH1           | ND1         | NADH-ubiquinone oxidoreductase                              | 35.656  | 11.6                   | 3               | 4           | #N/A                   | #N/A            | #N/A        |
| Q6QTH0           | ND2         | NADH-ubiquinone oxidoreductase                              | 39.213  | 2.6                    | 1               | 2           | 2                      | 1               | 2           |
| Q85BD6           | ND5         | NADH-ubiquinone oxidoreductase                              | 68.256  | 4                      | 2               | 4           | 4                      | 2               | 2           |
| E1BM06           | NDC1        | Uncharacterized protein                                     | 76.594  | 25.4                   | 15              | 37          | 17.8                   | 10              | 21          |
| E1BF82           | NDC80       | Uncharacterized protein                                     | 73.767  | 10.7                   | 7               | 8           | 11.2                   | 8               | 12          |
| F1ML71           | NDFIP2      | Uncharacterized protein                                     | 36.761  | #N/A                   | #N/A            | #N/A        | 4.2                    | 1               | 1           |



| Accession number | Gene symbol | Discription                                                   | MW(kDa) | Biological Replicate 1 |                 |             | Biological Replicate 2 |                 |             |
|------------------|-------------|---------------------------------------------------------------|---------|------------------------|-----------------|-------------|------------------------|-----------------|-------------|
|                  |             |                                                               |         | Sequence coverage(%)   | Unique peptides | MS/MS count | Sequence coverage(%)   | Unique peptides | MS/MS count |
| A7YVD7           | NDUFAF6     | NADH dehydrogenase (ubiquinone) complex I, assembly factor 6  | 38.102  | 12                     | 3               | 3           | #N/A                   | #N/A            | #N/A        |
| Q2KHV5           | NDUFAF7     | NADH dehydrogenase [ubiquinone] complex I, assembly factor 7  | 49.264  | 8.6                    | 4               | 7           | #N/A                   | #N/A            | #N/A        |
| Q02373           | NDUFB10     | NADH dehydrogenase [ubiquinone] 1 beta subcomplex subunit 10  | 20.965  | 33.5                   | 6               | 16          | 20.5                   | 3               | 8           |
| Q8HXG5           | NDUFB11     | NADH dehydrogenase [ubiquinone] 1 beta subcomplex subunit 11, | 17.573  | 18.2                   | 2               | 4           | 7.1                    | 1               | 4           |
| Q02365           | NDUFB3      | NADH dehydrogenase [ubiquinone] 1 beta subcomplex subunit 3   | 11.141  | 12.2                   | 1               | 2           | 12.2                   | 1               | 5           |
| P48305           | NDUFB4      | NADH dehydrogenase [ubiquinone] 1 beta subcomplex subunit 4   | 15.184  | 13.2                   | 1               | 1           | 15.5                   | 2               | 3           |
| Q02380           | NDUFB5      | NADH dehydrogenase [ubiquinone] 1 beta subcomplex subunit 5,  | 21.589  | 10.1                   | 2               | 3           | 16.9                   | 3               | 3           |
| Q02367           | NDUFB6      | NADH dehydrogenase [ubiquinone] 1 beta subcomplex subunit 6   | 15.524  | 21.1                   | 2               | 2           | 14.8                   | 2               | 6           |
| Q02368           | NDUFB7      | NADH dehydrogenase [ubiquinone] 1 beta subcomplex subunit 7   | 16.398  | 19                     | 2               | 3           | 9.5                    | 1               | 1           |
| Q02372           | NDUFB8      | NADH dehydrogenase [ubiquinone] 1 beta subcomplex subunit 8,  | 21.652  | 29                     | 4               | 6           | #N/A                   | #N/A            | #N/A        |
| Q02369           | NDUFB9      | NADH dehydrogenase [ubiquinone] 1 beta subcomplex subunit 9   | 21.789  | 29.6                   | 6               | 11          | 7.8                    | 2               | 9           |
| Q02827           | NDUFC2      | NADH dehydrogenase [ubiquinone] 1 subunit C2                  | 14.096  | #N/A                   | #N/A            | #N/A        | 15                     | 2               | 3           |
| P15690           | NDUFS1      | NADH-ubiquinone oxidoreductase 75 kDa subunit, mitochondrial  | 79.441  | 48.1                   | 30              | 69          | 29.8                   | 22              | 55          |
| P17694           | NDUFS2      | NADH dehydrogenase [ubiquinone] iron-sulfur protein 2,        | 52.555  | 37.6                   | 15              | 43          | 14.9                   | 8               | 30          |
| F1MS25           | NDUFS3      | NADH dehydrogenase [ubiquinone] iron-sulfur protein 3,        | 27.902  | 46.3                   | 10              | 27          | 22.7                   | 5               | 21          |
| Q02375           | NDUFS4      | NADH dehydrogenase [ubiquinone] iron-sulfur protein 4,        | 19.811  | 23.4                   | 4               | 5           | 20.6                   | 3               | 7           |

| Accession number | Gene symbol | Discription                                                        | MW(kDa) | Biological Replicate 1 |                 |             | Biological Replicate 2 |                 |             |
|------------------|-------------|--------------------------------------------------------------------|---------|------------------------|-----------------|-------------|------------------------|-----------------|-------------|
|                  |             |                                                                    |         | Sequence coverage(%)   | Unique peptides | MS/MS count | Sequence coverage(%)   | Unique peptides | MS/MS count |
| P23934           | NDUFS6      | NADH dehydrogenase [ubiquinone] iron-sulfur protein 6,             | 13.413  | 12.1                   | 1               | 3           | 21.8                   | 2               | 7           |
| A8WFQ0           | NDUFS7      | NADH dehydrogenase [ubiquinone] iron-sulfur protein 7,             | 20.121  | 32.4                   | 6               | 13          | 24                     | 4               | 12          |
| P42028           | NDUFS8      | NADH dehydrogenase [ubiquinone] iron-sulfur protein 8,             | 23.896  | 27.8                   | 5               | 12          | 17.5                   | 3               | 6           |
| P25708           | NDUFV1      | NADH dehydrogenase [ubiquinone] flavoprotein 1, mitochondrial      | 50.651  | 58.2                   | 19              | 57          | 30.2                   | 14              | 33          |
| P04394           | NDUFV2      | NADH dehydrogenase [ubiquinone] flavoprotein 2, mitochondrial      | 27.307  | 34.5                   | 6               | 12          | 12                     | 3               | 9           |
| E1BME9           | NDUFV3      | NADH dehydrogenase [ubiquinone] flavoprotein 3, mitochondrial      | 51.58   | 9.1                    | 4               | 5           | 18.5                   | 8               | 12          |
| F1MQI3           | NEB         | Uncharacterized protein                                            | 801.88  | #N/A                   | #N/A            | #N/A        | 0.2                    | 1               | 1           |
| Q3T093           | NECAP1      | Adaptin ear-binding coat-associated protein 1                      | 29.597  | 5.5                    | 2               | 2           | 3.3                    | 1               | 3           |
| Q5E9Q4           | NECAP2      | Adaptin ear-binding coat-associated protein 2                      | 28.551  | 39.8                   | 8               | 19          | 18                     | 5               | 12          |
| Q3B7M6           | NEDD1       | Protein NEDD1                                                      | 71.203  | 4.1                    | 2               | 2           | 4.1                    | 2               | 2           |
| F1MJ10           | NEDD4       | Uncharacterized protein                                            | 148.56  | 2.4                    | 1               | 2           | #N/A                   | #N/A            | #N/A        |
| F1MJ09           | NEDD4L      | E3 ubiquitin-protein ligase                                        | 100.81  | 9.6                    | 5               | 9           | 3.8                    | 2               | 4           |
| E1BBM3           | NEK1        | Uncharacterized protein                                            | 145.08  | #N/A                   | #N/A            | #N/A        | 0.6                    | 1               | 2           |
| A4IFF6           | NEK3        | NEK3 protein                                                       | 56.245  | 2.2                    | 1               | 1           | #N/A                   | #N/A            | #N/A        |
| F1MM88           | NEK9        | Uncharacterized protein (Fragment)                                 | 108.34  | 18.7                   | 13              | 21          | 7.9                    | 8               | 19          |
| G5E5S2           | NELFB       | Uncharacterized protein (Fragment)                                 | 65.622  | 9.5                    | 5               | 6           | 2.2                    | 1               | 1           |
| F1MW69           | NELFCD      | Uncharacterized protein (Fragment)                                 | 67.484  | 11                     | 5               | 7           | #N/A                   | #N/A            | #N/A        |
| Q0V898           | NELFE       | Negative elongation factor E                                       | 42.33   | 4.8                    | 1               | 1           | #N/A                   | #N/A            | #N/A        |
| F1MKA1           | NEMF        | Uncharacterized protein                                            | 123.14  | 2                      | 2               | 3           | 2.5                    | 3               | 3           |
| F1MQ21           | NES         | Uncharacterized protein (Fragment)                                 | 168.1   | #N/A                   | #N/A            | #N/A        | 0.6                    | 1               | 2           |
| A5PKG4           | NFS1        | NFS1 protein                                                       | 50.343  | 7.9                    | 4               | 6           | 14.9                   | 7               | 14          |
| Q2KJF3           | NFU1        | NFU1 iron-sulfur cluster scaffold homolog ( <i>S. cerevisiae</i> ) | 28.145  | 11.1                   | 2               | 3           | 9.9                    | 2               | 4           |
| F1MPV5           | NFXL1       | Uncharacterized protein                                            | 101.68  | 5.3                    | 4               | 4           | 7.8                    | 6               | 8           |

| Accession number | Gene symbol | Discription                                     | MW(kDa) | Biological Replicate 1 |                 |             | Biological Replicate 2 |                 |             |
|------------------|-------------|-------------------------------------------------|---------|------------------------|-----------------|-------------|------------------------|-----------------|-------------|
|                  |             |                                                 |         | Sequence coverage(%)   | Unique peptides | MS/MS count | Sequence coverage(%)   | Unique peptides | MS/MS count |
| E1BKB2           | NGLY1       | Uncharacterized protein                         | 74.58   | 29.1                   | 23              | 47          | 19.9                   | 15              | 29          |
| Q1JQA6           | NHEJ1       | Nonhomologous end-joining factor 1              | 33.584  | 2.7                    | 1               | 2           | #N/A                   | #N/A            | #N/A        |
| Q3B8S0           | NHP2L1      | NHP2-like protein 1                             | 14.173  | 9.4                    | 1               | 1           | #N/A                   | #N/A            | #N/A        |
| Q05B89           | NIF3L1      | Putative GTP cyclohydrolase 1 type 2 NIF3L1     | 41.905  | 46.9                   | 14              | 46          | 19.1                   | 7               | 22          |
| E1BQ19           | NIN         | Uncharacterized protein (Fragment)              | 207.39  | 0.8                    | 2               | 3           | #N/A                   | #N/A            | #N/A        |
| Q5E9Q0           | NIP30       | NEFA-interacting nuclear protein                | 28.596  | 5.9                    | 1               | 2           | 9.9                    | 3               | 3           |
| F1MSQ7           | NIPSNAP1    | Uncharacterized protein                         | 33.125  | 14.4                   | 4               | 7           | 16.5                   | 5               | 7           |
| G3X6L8           | NIPSNAP3A   | Uncharacterized protein                         | 28.523  | 25.1                   | 4               | 4           | 5.3                    | 1               | 2           |
| F1N322           | NISCH       | Uncharacterized protein (Fragment)              | 172.13  | 4.7                    | 7               | 11          | #N/A                   | #N/A            | #N/A        |
| Q32LH4           | NIT1        | Nitrilase homolog 1                             | 36.239  | 5.5                    | 1               | 1           | #N/A                   | #N/A            | #N/A        |
| F1MJ59           | NIT2        | Omega-amidase NIT2                              | 30.433  | 57.6                   | 13              | 36          | 40.9                   | 11              | 27          |
| G3MYW2           | NKRF        | Uncharacterized protein                         | 77.719  | #N/A                   | #N/A            | #N/A        | 2.2                    | 1               | 1           |
| A2VDQ5           | NLN         | Neurolysin, mitochondrial                       | 80.727  | #N/A                   | #N/A            | #N/A        | 2.4                    | 2               | 3           |
| E1BNN6           | NLRP1       | Uncharacterized protein                         | 165.51  | 4.4                    | 6               | 6           | #N/A                   | #N/A            | #N/A        |
| G3MYV6           | NLRP13      | Uncharacterized protein                         | 115.51  | 50.4                   | 48              | 108         | 25.5                   | 25              | 65          |
| E1BDZ4           | NLRP14      | Uncharacterized protein                         | 125     | 49.6                   | 48              | 176         | 22.8                   | 23              | 93          |
| G3N3W5           | NLRP2       | Uncharacterized protein (Fragment)              | 104.69  | 57.7                   | 30              | 120         | 30.5                   | 21              | 116         |
| Q647I9           | NLRP5       | NACHT, LRR and PYD domains-containing protein 5 | 120.99  | 70.2                   | 3               | 296         | 40.5                   | 2               | 251         |
| G3N2C1           | NLRP7       | Uncharacterized protein (Fragment)              | 101.34  | 59.8                   | 37              | 261         | 30.3                   | 23              | 177         |
| E1BL33           | NLRP8       | Uncharacterized protein                         | 115.5   | 53.7                   | 52              | 271         | 27                     | 29              | 157         |
| F1MKL3           | NLRP9       | NACHT, LRR and PYD domains-containing protein 9 | 114.23  | 49.9                   | 2               | 193         | 18.8                   | 1               | 56          |
| Q08DS5           | NMD3        | 60S ribosomal export protein NMD3               | 57.748  | 16.5                   | 8               | 8           | #N/A                   | #N/A            | #N/A        |
| P52174           | NME11       | Nucleoside diphosphate kinase A 1               | 17.261  | 73.7                   | 1               | 1           | #N/A                   | #N/A            | #N/A        |
| P52175           | NME12       | Nucleoside diphosphate kinase A 2               | 17.298  | 84.2                   | 3               | 132         | 55.3                   | 5               | 37          |
| Q3TOQ4           | NME2        | Nucleoside diphosphate kinase B                 | 17.316  | 67.8                   | 7               | 72          | 55.3                   | 6               | 110         |
| A5PK70           | NME3        | Nucleoside diphosphate kinase                   | 19.079  | 13.6                   | 3               | 3           | 7.1                    | 1               | 2           |
| G1K159           | NME7        | Nucleoside diphosphate kinase 7                 | 22.368  | 5.6                    | 1               | 2           | #N/A                   | #N/A            | #N/A        |
| Q0VCN1           | NMRAL1      | NmrA-like family domain-containing protein 1    | 33.153  | 5.7                    | 2               | 2           | 7.7                    | 3               | 3           |



| Accession number | Gene symbol | Discription                                                 | MW(kDa) | Biological Replicate 1 |                 |             | Biological Replicate 2 |                 |             |
|------------------|-------------|-------------------------------------------------------------|---------|------------------------|-----------------|-------------|------------------------|-----------------|-------------|
|                  |             |                                                             |         | Sequence coverage(%)   | Unique peptides | MS/MS count | Sequence coverage(%)   | Unique peptides | MS/MS count |
| F1MZK0           | NMT1        | Glycylpeptide N-                                            | 56.805  | 6.2                    | 3               | 3           | #N/A                   | #N/A            | #N/A        |
| P11024           | NNT         | NAD(P) transhydrogenase,                                    | 113.85  | 24.7                   | 26              | 56          | 17                     | 19              | 51          |
| F1MVS4           | NOL3        | Uncharacterized protein                                     | 22.596  | 20.4                   | 4               | 8           | 14.6                   | 2               | 2           |
| F1MF76           | NOMO1       | Uncharacterized protein                                     | 134.07  | 36                     | 31              | 63          | 13.8                   | 16              | 51          |
| Q2KJ42           | NONO        | Non-POU domain containing, octamer-                         | 54.121  | #N/A                   | #N/A            | #N/A        | 6.4                    | 1               | 1           |
| Q3SZ63           | NOP56       | Nucleolar protein 56                                        | 66.33   | 3.9                    | 2               | 2           | #N/A                   | #N/A            | #N/A        |
| B0JYK2           | NPC1        | NPC1 protein                                                | 141.84  | 4.9                    | 6               | 11          | 2.6                    | 4               | 9           |
| P79345           | NPC2        | Epididymal secretory protein E1                             | 16.64   | 18.1                   | 5               | 21          | 8.7                    | 3               | 12          |
| F1MPJ8           | NPEPL1      | Uncharacterized protein (Fragment)                          | 50.295  | 41.1                   | 16              | 33          | 15.6                   | 6               | 20          |
| E1BP91           | NPEPPS      | Uncharacterized protein                                     | 103.6   | 49.7                   | 40              | 88          | 18.9                   | 18              | 55          |
| F1N7U2           | NPLOC4      | Uncharacterized protein                                     | 68.039  | 28.1                   | 18              | 29          | 12.2                   | 8               | 16          |
| Q3T160           | NPM1        | Nucleophosmin                                               | 32.703  | 31.6                   | 8               | 17          | 18                     | 6               | 24          |
| D2DSG3           | NPM2        | Nucleoplasmin 2                                             | 22.582  | 65.5                   | 10              | 68          | 34                     | 6               | 28          |
| F6RM11           | NPTN        | Uncharacterized protein                                     | 30.975  | #N/A                   | #N/A            | #N/A        | 3.2                    | 1               | 2           |
| G3MYU9           | NPTX2       | Uncharacterized protein                                     | 46.887  | 21.7                   | 11              | 23          | 15.2                   | 9               | 24          |
| Q3SZT2           | NQO2        | NAD(P)H dehydrogenase, quinone 2                            | 25.916  | 7.4                    | 1               | 1           | #N/A                   | #N/A            | #N/A        |
| A5D7R9           | NRAS        | NRAS protein                                                | 21.229  | #N/A                   | #N/A            | #N/A        | 10.6                   | 2               | 6           |
| Q08DY5           | NRBP1       | Nuclear receptor binding protein 1                          | 59.884  | 7.9                    | 3               | 6           | 2.6                    | 1               | 1           |
| F1MX5            | NRD1        | Uncharacterized protein (Fragment)                          | 119.38  | 0.8                    | 1               | 2           | 0.8                    | 1               | 2           |
| Q3ZBE9           | NSDHL       | Sterol-4-alpha-carboxylate 3-dehydrogenase, decarboxylating | 39.902  | 42.7                   | 12              | 36          | 20.8                   | 8               | 35          |
| F1MZU2           | NSF         | Uncharacterized protein                                     | 82.991  | 59                     | 53              | 185         | 42.1                   | 33              | 122         |
| Q3SZC4           | NSFL1C      | NSFL1 cofactor p47                                          | 40.653  | 46.5                   | 14              | 23          | 41.4                   | 12              | 24          |
| F1MK61           | NSUN2       | Uncharacterized protein                                     | 86.51   | 4                      | 2               | 2           | #N/A                   | #N/A            | #N/A        |
| O46411           | NT5C2       | Cytosolic purine 5-nucleotidase                             | 64.84   | 18.6                   | 8               | 14          | 1.8                    | 1               | 3           |
| F1MLB9           | NT5C3L      | Uncharacterized protein                                     | 33.89   | 8.9                    | 3               | 3           | #N/A                   | #N/A            | #N/A        |
| Q2TBU5           | NT5DC1      | 5-nucleotidase domain-containing                            | 51.365  | 6.9                    | 3               | 6           | 2                      | 1               | 1           |
| E1BNI8           | NT5DC2      | Uncharacterized protein                                     | 64.314  | 19                     | 9               | 14          | 10.6                   | 7               | 9           |
| Q05927           | NT5E        | 5-nucleotidase                                              | 62.965  | 16.9                   | 5               | 17          | 12.4                   | 6               | 12          |
| E1B891           | NTAN1       | Uncharacterized protein                                     | 34.639  | 29.4                   | 7               | 9           | #N/A                   | #N/A            | #N/A        |
| Q1LZ78           | NTPCR       | Cancer-related nucleoside-triphosphatase homolog            | 20.682  | 25.3                   | 4               | 6           | 12.1                   | 2               | 5           |

| Accession number | Gene symbol | Discription                                               | MW(kDa) | Biological Replicate 1 |                 |             | Biological Replicate 2 |                 |             |
|------------------|-------------|-----------------------------------------------------------|---------|------------------------|-----------------|-------------|------------------------|-----------------|-------------|
|                  |             |                                                           |         | Sequence coverage(%)   | Unique peptides | MS/MS count | Sequence coverage(%)   | Unique peptides | MS/MS count |
| Q05B69           | NUB1        | NEDD8 ultimate buster 1                                   | 70.381  | 9.9                    | 6               | 8           | #N/A                   | #N/A            | #N/A        |
| Q24K00           | NUBP1       | Cytosolic Fe-S cluster assembly factor NUBP1              | 34.182  | 18.8                   | 5               | 10          | 6.9                    | 3               | 4           |
| Q3MHY6           | NUBP2       | Cytosolic Fe-S cluster assembly factor NUBP2              | 28.789  | 33.6                   | 6               | 8           | 5.9                    | 1               | 1           |
| E1BE32           | NUBPL       | Uncharacterized protein                                   | 35.733  | 6.3                    | 2               | 2           | 6                      | 2               | 3           |
| Q0P569           | NUCB1       | Nucleobindin-1                                            | 54.982  | 12                     | 5               | 6           | 9.3                    | 5               | 7           |
| Q0IIH5           | NUCB2       | Nucleobindin 2                                            | 49.188  | 5.5                    | 2               | 3           | 12                     | 5               | 11          |
| Q17QG2           | NUDC        | Nuclear migration protein nudC                            | 38.242  | 43.7                   | 16              | 36          | 30.7                   | 10              | 26          |
| E1BLF7           | NUDCD1      | Uncharacterized protein                                   | 66.757  | 21.3                   | 11              | 17          | 8.4                    | 5               | 10          |
| Q32KU8           | NUDCD2      | NudC domain containing 2                                  | 17.646  | 7                      | 1               | 1           | #N/A                   | #N/A            | #N/A        |
| Q24K01           | NUDCD3      | NudC domain containing 3                                  | 40.178  | 3.1                    | 1               | 1           | #N/A                   | #N/A            | #N/A        |
| F1MLL8           | NUDT1       | Uncharacterized protein (Fragment)                        | 18.187  | 9.5                    | 1               | 1           | #N/A                   | #N/A            | #N/A        |
| A7MBH2           | NUDT11      | Diphosphoinositol polyphosphate phosphohydrolase 3-beta   | 18.518  | 11.6                   | 3               | 3           | #N/A                   | #N/A            | #N/A        |
| Q05B60           | NUDT14      | Uridine diphosphate glucose pyrophosphatase               | 23.901  | 27.5                   | 5               | 7           | 6.8                    | 2               | 2           |
| E1B7T3           | NUDT15      | Uncharacterized protein                                   | 19.559  | 48                     | 6               | 22          | 12.9                   | 2               | 2           |
| A1A4Q9           | NUDT16      | U8 snoRNA-decapping enzyme                                | 21.398  | 47.2                   | 7               | 11          | 5.6                    | 1               | 2           |
| A4FUG7           | NUDT17      | Nucleoside diphosphate-linked moiety X motif 17           | 32.389  | 6.3                    | 1               | 2           | #N/A                   | #N/A            | #N/A        |
| Q29RJ1           | NUDT2       | Bis(5-nucleosyl)-tetrakisphatase [asymmetrical]           | 16.775  | 46.3                   | 5               | 15          | #N/A                   | #N/A            | #N/A        |
| Q3ZCA2           | NUDT21      | Cleavage and polyadenylation specificity factor subunit 5 | 26.227  | 33.9                   | 7               | 11          | 7.5                    | 2               | 3           |
| F1MMR8           | NUDT5       | Uncharacterized protein                                   | 18.648  | 18.6                   | 3               | 7           | 9.3                    | 1               | 2           |
| A7MBI8           | NUDT9       | NUDT9 protein                                             | 38.612  | 14.6                   | 5               | 6           | #N/A                   | #N/A            | #N/A        |
| A6H7B3           | NUF2        | NUF2 protein                                              | 54.61   | 13.5                   | 6               | 6           | 5.6                    | 3               | 3           |
| F1MXK2           | NUFIP2      | Uncharacterized protein (Fragment)                        | 72.859  | 6.4                    | 4               | 6           | #N/A                   | #N/A            | #N/A        |
| E1BDU0           | NUP107      | Uncharacterized protein                                   | 107.16  | 10.2                   | 8               | 10          | 1.7                    | 2               | 2           |
| F1MM55           | NUP133      | Uncharacterized protein                                   | 129.06  | 15.9                   | 14              | 20          | 3.9                    | 5               | 8           |
| F1MNT1           | NUP155      | Uncharacterized protein                                   | 155.18  | 7.9                    | 10              | 13          | 5.9                    | 7               | 11          |

| Accession number | Gene symbol | Discription                                     | MW(kDa) | Biological Replicate 1 |                 |             | Biological Replicate 2 |                 |             |
|------------------|-------------|-------------------------------------------------|---------|------------------------|-----------------|-------------|------------------------|-----------------|-------------|
|                  |             |                                                 |         | Sequence coverage(%)   | Unique peptides | MS/MS count | Sequence coverage(%)   | Unique peptides | MS/MS count |
| F1N6B6           | NUP188      | Uncharacterized protein                         | 196.27  | 4.2                    | 7               | 9           | #N/A                   | #N/A            | #N/A        |
| A6QPZ3           | NUP35       | NUP35 protein                                   | 28.796  | 16.9                   | 4               | 6           | 4.9                    | 1               | 2           |
| A3KMW1           | NUP43       | NUP43 protein                                   | 42.09   | 8.2                    | 2               | 3           | #N/A                   | #N/A            | #N/A        |
| F1N1Q5           | NUP54       | Uncharacterized protein                         | 56.03   | 9                      | 2               | 6           | #N/A                   | #N/A            | #N/A        |
| Q3SZ56           | NUP88       | Nucleoporin 88kDa                               | 83.771  | 11.2                   | 6               | 6           | 3                      | 2               | 4           |
| A5PJZ5           | NUP93       | Nuclear pore complex protein Nup93              | 93.457  | 31                     | 24              | 45          | 16.1                   | 14              | 26          |
| E1BCV4           | NUP98       | Uncharacterized protein                         | 197.63  | 7.1                    | 10              | 12          | 3.7                    | 7               | 10          |
| A5D7B3           | NUPL1       | NUPL1 protein                                   | 59.302  | 4.6                    | 3               | 3           | #N/A                   | #N/A            | #N/A        |
| Q2YDJ0           | NUSAP1      | Nucleolar and spindle-associated                | 52.327  | 8.2                    | 4               | 4           | 5.8                    | 3               | 5           |
| Q32KP9           | NUTF2       | Nuclear transport factor 2                      | 14.478  | 74.8                   | 6               | 37          | 22.8                   | 3               | 7           |
| A6QLU8           | NXN         | Nucleoredoxin                                   | 48.331  | 21.8                   | 7               | 16          | 15.2                   | 5               | 10          |
| Q1LZ74           | OARD1       | O-acetyl-ADP-ribose deacetylase 1               | 17.034  | 32.2                   | 5               | 8           | #N/A                   | #N/A            | #N/A        |
| Q3ZCF5           | OAT         | Ornithine aminotransferase,                     | 48.075  | 19.4                   | 7               | 12          | #N/A                   | #N/A            | #N/A        |
| Q08DB2           | OBFC1       | CST complex subunit STN1                        | 41.935  | 5.1                    | 2               | 2           | #N/A                   | #N/A            | #N/A        |
| Q5E948           | Ociad1      | OCIA domain-containing protein 1                | 27.829  | 17.8                   | 4               | 6           | 3.2                    | 1               | 2           |
| Q148N0           | OGDH        | 2-oxoglutarate dehydrogenase, mitochondrial     | 115.81  | 56.2                   | 38              | 136         | 23.2                   | 17              | 74          |
| F1MWG1           | OGDHL       | Uncharacterized protein                         | 114.42  | 42.6                   | 25              | 65          | 17.9                   | 12              | 35          |
| F6RA54           | OGFR        | Uncharacterized protein                         | 59.556  | 5.4                    | 2               | 2           | #N/A                   | #N/A            | #N/A        |
| A5D7G1           | OGT         | OGT protein                                     | 115.75  | 3                      | 2               | 2           | #N/A                   | #N/A            | #N/A        |
| Q2HJ33           | OLA1        | Obg-like ATPase 1                               | 44.743  | 43.2                   | 13              | 21          | 10.6                   | 5               | 8           |
| Q3SZN3           | OMA1        | Metalloendopeptidase OMA1,                      | 59.895  | 2.3                    | 1               | 1           | #N/A                   | #N/A            | #N/A        |
| A0JNQ6           | OOEP        | Oocyte-expressed protein homolog                | 15.868  | 42.1                   | 6               | 118         | 35.7                   | 6               | 34          |
| Q2Q0J1           | OOSP1       | Oocyte-secreted protein 1                       | 18.506  | 6.7                    | 1               | 2           | 6.7                    | 1               | 3           |
| E1BBC4           | OPA1        | Uncharacterized protein                         | 115.59  | 56.7                   | 63              | 221         | 43.4                   | 45              | 205         |
| D9IE06           | OPA3        | Mitochondrial optic atrophy 3 protein isoform b | 20.655  | 19.4                   | 4               | 7           | 4.8                    | 1               | 5           |
| Q3ZC32           | OPTN        | Optineurin                                      | 65.238  | 7                      | 3               | 4           | 5.6                    | 3               | 5           |
| A5PKA7           | ORAI1       | ORAI1 protein                                   | 32.821  | 4.3                    | 1               | 1           | #N/A                   | #N/A            | #N/A        |
| Q58DC8           | ORC1        | Origin recognition complex subunit              | 97.901  | 1.6                    | 1               | 1           | #N/A                   | #N/A            | #N/A        |
| F1N230           | ORC2        | Origin recognition complex subunit              | 66.224  | 6.2                    | 3               | 3           | 2.8                    | 2               | 4           |
| Q32PJ3           | ORC3        | Origin recognition complex subunit              | 82.23   | 1.1                    | 1               | 2           | 2.1                    | 2               | 4           |

| Accession number | Gene symbol | Discription                                              | MW(kDa) | Biological Replicate 1 |                 |             | Biological Replicate 2 |                 |             |
|------------------|-------------|----------------------------------------------------------|---------|------------------------|-----------------|-------------|------------------------|-----------------|-------------|
|                  |             |                                                          |         | Sequence coverage(%)   | Unique peptides | MS/MS count | Sequence coverage(%)   | Unique peptides | MS/MS count |
| A5PJS5           | ORC5L       | ORC5L protein                                            | 50.52   | 8.3                    | 3               | 5           | 2.1                    | 1               | 1           |
| Q29RQ9           | ORMDL1      | ORM1-like protein 1                                      | 17.361  | 19                     | 2               | 3           | #N/A                   | #N/A            | #N/A        |
| Q5E972           | ORMDL2      | ORM1-like protein 2                                      | 17.403  | #N/A                   | #N/A            | #N/A        | 7.2                    | 1               | 2           |
| Q3MHX6           | OS9         | Protein OS-9                                             | 75.778  | 9.7                    | 7               | 8           | 6                      | 4               | 8           |
| E1BPW1           | OSBP        | Oxysterol-binding protein                                | 78.808  | 20.1                   | 15              | 27          | 6.8                    | 5               | 7           |
| G3X8E8           | OSBPL10     | Oxysterol-binding protein                                | 48.538  | 20.4                   | 7               | 13          | 11                     | 4               | 8           |
| E1BLV1           | OSBPL1A     | Oxysterol-binding protein                                | 108.44  | 24.3                   | 21              | 42          | 10.4                   | 11              | 15          |
| E1BL67           | OSBPL2      | Oxysterol-binding protein                                | 54.983  | 8.8                    | 3               | 3           | #N/A                   | #N/A            | #N/A        |
| F1MLJ5           | OSBPL3      | Oxysterol-binding protein                                | 104.27  | 16.7                   | 13              | 19          | 4.7                    | 4               | 5           |
| E1BA05           | OSBPL8      | Oxysterol-binding protein                                | 100.09  | 10.5                   | 8               | 13          | 2.5                    | 2               | 2           |
| F6Q615           | OSBPL9      | Oxysterol-binding protein                                | 84.372  | 22.8                   | 14              | 29          | 6.3                    | 5               | 8           |
| Q29S00           | OSCP1       | Protein OSCP1                                            | 43.016  | 5.3                    | 1               | 1           | #N/A                   | #N/A            | #N/A        |
| Q2KID7           | OSTC        | Oligosaccharyltransferase complex subunit OSTC           | 16.769  | 8.1                    | 1               | 4           | #N/A                   | #N/A            | #N/A        |
| Q3TOY1           | OTUB1       | OTU domain, ubiquitin aldehyde                           | 31.308  | 57.2                   | 13              | 52          | 15.9                   | 5               | 15          |
| G3MZU7           | OTUD3       | Uncharacterized protein                                  | 46.489  | 5.3                    | 1               | 3           | #N/A                   | #N/A            | #N/A        |
| E1BN58           | OTUD4       | Uncharacterized protein                                  | 122.39  | 6                      | 7               | 11          | 3.8                    | 4               | 7           |
| E1BFW9           | OTUD5       | Uncharacterized protein                                  | 60.321  | 3                      | 1               | 1           | #N/A                   | #N/A            | #N/A        |
| F1N0N7           | OTUD6B      | Uncharacterized protein                                  | 33.596  | 13.7                   | 3               | 5           | #N/A                   | #N/A            | #N/A        |
| E1B9S7           | OTUD7B      | Uncharacterized protein                                  | 91.973  | 1.7                    | 1               | 1           | #N/A                   | #N/A            | #N/A        |
| Q3SZ07           | OVCA2       | Ovarian cancer-associated gene 2 protein homolog         | 24.167  | 8.4                    | 2               | 7           | #N/A                   | #N/A            | #N/A        |
| F1N5F0           | OVCH1       | Uncharacterized protein (Fragment)                       | 117.84  | 8.6                    | 10              | 19          | 7.5                    | 9               | 26          |
| Q24JZ7           | OXCT1       | Succinyl-CoA:3-ketoacid-coenzyme A transferase           | 56.452  | 44.6                   | 18              | 60          | 19.8                   | 10              | 26          |
| Q0VCA7           | OXSM        | 3-oxoacyl-[acyl-carrier-protein] synthase, mitochondrial | 48.616  | 8.3                    | 3               | 4           | #N/A                   | #N/A            | #N/A        |
| F1MYV9           | OXSR1       | Uncharacterized protein                                  | 57.926  | 27.7                   | 13              | 26          | 12.5                   | 7               | 14          |
| Q3T044           | P33MONOX    | Putative monooxygenase p33MONOX                          | 32.987  | 6.2                    | 2               | 2           | #N/A                   | #N/A            | #N/A        |
| F1MJQ4           | P4HA2       | Uncharacterized protein                                  | 60.727  | 32.8                   | 16              | 28          | 22.5                   | 11              | 25          |
| A0JBZ9           | p97bcnt2    | Bucentaur-2                                              | 70.833  | 32.2                   | 7               | 37          | 15.3                   | 6               | 18          |
| Q3ZBH5           | PA2G4       | Proliferation-associated 2G4, 38kDa                      | 43.802  | 39.8                   | 14              | 24          | 14.5                   | 5               | 8           |

| Accession number | Gene symbol | Discription                                                            | MW(kDa) | Biological Replicate 1 |                 |             | Biological Replicate 2 |                 |             |
|------------------|-------------|------------------------------------------------------------------------|---------|------------------------|-----------------|-------------|------------------------|-----------------|-------------|
|                  |             |                                                                        |         | Sequence coverage(%)   | Unique peptides | MS/MS count | Sequence coverage(%)   | Unique peptides | MS/MS count |
| P61286           | PABPC1      | Polyadenylate-binding protein 1                                        | 70.67   | 37.6                   | 9               | 24          | 28.3                   | 9               | 41          |
| E1BNB4           | PABPC1L     | Uncharacterized protein                                                | 68.685  | 47.4                   | 26              | 150         | 34.5                   | 18              | 110         |
| A4IFC3           | PABPC4      | PABPC4 protein                                                         | 70.837  | 42.9                   | 14              | 55          | 22.3                   | 6               | 23          |
| E1BG62           | PACS1       | Uncharacterized protein (Fragment)                                     | 90.301  | 4.4                    | 3               | 4           | #N/A                   | #N/A            | #N/A        |
| Q1RMR9           | PAC SIN2    | Protein kinase C and casein kinase substrate in neurons 2              | 55.89   | 38.9                   | 17              | 31          | 23                     | 13              | 26          |
| E1BCN3           | PADI4       | Uncharacterized protein                                                | 74.158  | 1.1                    | 1               | 6           | 1.1                    | 1               | 3           |
| F1N404           | PADI6       | Uncharacterized protein                                                | 76.993  | 64.2                   | 46              | 862         | 42                     | 34              | 435         |
| P68401           | PAFAH1B2    | Platelet-activating factor acetylhydrolase IB subunit beta             | 25.569  | 30.6                   | 6               | 10          | 7.9                    | 2               | 8           |
| Q29460           | PAFAH1B3    | Platelet-activating factor acetylhydrolase IB subunit gamma            | 25.865  | 57.8                   | 11              | 34          | 22.4                   | 6               | 10          |
| Q2HJ26           | PAICS       | Phosphoribosylaminoimidazole carboxylase, phosphoribosylaminoimidazole | 47.122  | 42.1                   | 20              | 41          | 16.2                   | 9               | 17          |
| A5PKG2           | PAIP1       | PAIP1 protein                                                          | 45.603  | 38.8                   | 14              | 42          | 23                     | 11              | 35          |
| Q08E52           | PAK1        | Serine/threonine-protein kinase PAK                                    | 60.545  | 15.3                   | 3               | 8           | 3.3                    | 1               | 4           |
| G3MZE2           | PAK2        | Uncharacterized protein                                                | 58.046  | 18.7                   | 4               | 6           | 7.1                    | 3               | 9           |
| E1B7J7           | PAK3        | Uncharacterized protein                                                | 58.368  | 16.4                   | 2               | 10          | #N/A                   | #N/A            | #N/A        |
| F1MJW5           | PALLD       | Uncharacterized protein                                                | 125.18  | 3.2                    | 3               | 4           | 0.8                    | 1               | 1           |
| F1N3Q4           | PALM        | Uncharacterized protein (Fragment)                                     | 42.37   | 7.5                    | 2               | 2           | #N/A                   | #N/A            | #N/A        |
| G3MWK1           | PALM3       | Uncharacterized protein                                                | 80.859  | 14.5                   | 6               | 8           | 10.2                   | 6               | 13          |
| F2Z4I9           | PAM16       | Magmas-like protein                                                    | 13.911  | 6.4                    | 1               | 1           | 12                     | 2               | 2           |
| E1BML0           | PAN2        | Uncharacterized protein                                                | 135.13  | 0.9                    | 1               | 1           | #N/A                   | #N/A            | #N/A        |
| F1MLD0           | PANK4       | Uncharacterized protein                                                | 85.979  | 7                      | 5               | 7           | 2.7                    | 2               | 2           |
| Q865R1           | PAOX        | Peroxisomal N(1)-acetyl-spermine/spermidine oxidase                    | 56.324  | 24                     | 11              | 16          | 14.1                   | 7               | 14          |
| A5D7N5           | PAPOLG      | PAPOLG protein                                                         | 83.336  | 1.4                    | 1               | 1           | #N/A                   | #N/A            | #N/A        |
| Q2T9S9           | PAQR7       | Progestin and adipoQ receptor family member VII                        | 39.983  | 2.9                    | 1               | 1           | #N/A                   | #N/A            | #N/A        |
| O02776           | PARG        | Poly(ADP-ribose) glycohydrolase                                        | 110.84  | 7.2                    | 6               | 8           | #N/A                   | #N/A            | #N/A        |
| Q5E946           | PARK7       | Protein DJ-1                                                           | 20.035  | 85.2                   | 19              | 117         | 69.8                   | 15              | 95          |

| Accession number | Gene symbol | Discription                                                    | MW(kDa) | Biological Replicate 1 |                 |             | Biological Replicate 2 |                 |             |
|------------------|-------------|----------------------------------------------------------------|---------|------------------------|-----------------|-------------|------------------------|-----------------|-------------|
|                  |             |                                                                |         | Sequence coverage(%)   | Unique peptides | MS/MS count | Sequence coverage(%)   | Unique peptides | MS/MS count |
| Q2KHV4           | PARL        | Presenilins-associated rhomboid-like protein, mitochondrial    | 42.301  | 21.2                   | 6               | 16          | 7.4                    | 3               | 6           |
| P18493           | PARP1       | Poly [ADP-ribose] polymerase 1                                 | 113.49  | 11.1                   | 10              | 15          | 9.5                    | 10              | 17          |
| E1B7S1           | PARP12      | Uncharacterized protein                                        | 79.347  | 2                      | 1               | 1           | #N/A                   | #N/A            | #N/A        |
| A4FV46           | PARP16      | PARP16 protein                                                 | 36.528  | 18.6                   | 6               | 9           | 14.9                   | 5               | 9           |
| F1MHD4           | PARS2       | Uncharacterized protein                                        | 53.151  | 8.2                    | 3               | 3           | #N/A                   | #N/A            | #N/A        |
| F1N1E7           | PATL1       | Uncharacterized protein                                        | 86.886  | 2.2                    | 2               | 2           | 1.3                    | 1               | 1           |
| F1N6C5           | PATL2       | Uncharacterized protein (Fragment)                             | 58.17   | 29.7                   | 1               | 46          | 17                     | 6               | 19          |
| F1MV85           | PBDC1       | Uncharacterized protein                                        | 24.93   | 28.8                   | 6               | 9           | #N/A                   | #N/A            | #N/A        |
| A6QQX0           | PBK         | PBK protein                                                    | 36.441  | 34.9                   | 11              | 24          | 18.8                   | 7               | 16          |
| Q2HJF4           | PBLD        | Phenazine biosynthesis-like domain-containing protein          | 31.883  | 16.3                   | 4               | 4           | #N/A                   | #N/A            | #N/A        |
| A6QLY7           | PBXIP1      | Pre-B-cell leukemia transcription factor-interacting protein 1 | 80.257  | #N/A                   | #N/A            | #N/A        | 1.5                    | 1               | 1           |
| Q29RK2           | PC          | Pyruvate carboxylase, mitochondrial                            | 129.7   | 41.6                   | 42              | 107         | 30.1                   | 34              | 105         |
| Q3ZBD3           | PCBD1       | Pterin-4-alpha-carbinolamine                                   | 11.985  | 64.4                   | 7               | 22          | 49                     | 5               | 9           |
| Q5E9A3           | PCBP1       | Poly(rC)-binding protein 1                                     | 37.497  | 49.2                   | 9               | 33          | 21.6                   | 4               | 24          |
| Q3SYT9           | PCBP2       | Poly(RC) binding protein 2                                     | 36.801  | 33.2                   | 5               | 12          | 14.9                   | 2               | 6           |
| F6QNC4           | PCCA        | Uncharacterized protein                                        | 81.476  | 37.8                   | 27              | 52          | 24.4                   | 19              | 55          |
| Q2TBR0           | PCCB        | Propionyl-CoA carboxylase beta chain, mitochondrial            | 58.31   | 54.9                   | 22              | 40          | 35.1                   | 15              | 51          |
| F1MDS3           | PCK2        | Uncharacterized protein                                        | 70.649  | 16.2                   | 9               | 14          | 6.1                    | 4               | 7           |
| P15246           | PCMT1       | Protein-L-isoaspartate (D-aspartate) O-methyltransferase       | 24.565  | 40.5                   | 9               | 19          | 28.6                   | 6               | 18          |
| Q3ZBW4           | PCNA        | Proliferating cell nuclear antigen                             | 28.748  | 64.4                   | 16              | 59          | 35.2                   | 10              | 37          |
| Q32PF3           | PCNP        | PEST proteolytic signal-containing nuclear protein             | 18.988  | 5.1                    | 1               | 1           | #N/A                   | #N/A            | #N/A        |
| E1BKZ0           | PCNT        | Uncharacterized protein                                        | 327.24  | 0.5                    | 2               | 2           | #N/A                   | #N/A            | #N/A        |
| P02720           | PCTP        | Phosphatidylcholine transfer                                   | 24.643  | 28.6                   | 5               | 9           | #N/A                   | #N/A            | #N/A        |
| F1N2K1           | PCYOX1      | Uncharacterized protein                                        | 56.775  | 13.8                   | 6               | 7           | 1.6                    | 1               | 5           |
| Q0P5H1           | PCYOX1L     | Prenylcysteine oxidase-like                                    | 54.437  | 17.9                   | 9               | 13          | 11.4                   | 6               | 25          |
| Q0VCQ6           | PDCD10      | Programmed cell death 10                                       | 24.715  | 21.2                   | 5               | 8           | 4.7                    | 1               | 2           |

| Accession number | Gene symbol | Discription                                                                 | MW(kDa) | Biological Replicate 1 |                 |             | Biological Replicate 2 |                 |             |
|------------------|-------------|-----------------------------------------------------------------------------|---------|------------------------|-----------------|-------------|------------------------|-----------------|-------------|
|                  |             |                                                                             |         | Sequence coverage(%)   | Unique peptides | MS/MS count | Sequence coverage(%)   | Unique peptides | MS/MS count |
| Q2HJH9           | PDCD5       | Programmed cell death protein 5                                             | 14.226  | 40                     | 5               | 12          | 54.4                   | 7               | 17          |
| Q1LZ81           | PDCD6       | PDCD6 protein                                                               | 21.737  | 39.7                   | 6               | 10          | 7.4                    | 2               | 2           |
| E1BKM4           | PDCD6IP     | Uncharacterized protein (Fragment)                                          | 100.99  | 42                     | 36              | 85          | 29.1                   | 27              | 93          |
| Q29RZ1           | PDDC1       | Parkinson disease 7 domain-containing protein 1                             | 23.262  | 22.3                   | 3               | 3           | #N/A                   | #N/A            | #N/A        |
| Q08DF7           | PDE12       | 2,5-phosphodiesterase 12                                                    | 67.264  | 10.2                   | 5               | 6           | #N/A                   | #N/A            | #N/A        |
| A6QQQ0           | PDE4A       | PDE4A protein                                                               | 70.684  | 1.6                    | 1               | 1           | #N/A                   | #N/A            | #N/A        |
| Q95142           | PDE6D       | Retinal rod rhodopsin-sensitive cGMP 3,5-cyclic phosphodiesterase           | 17.39   | 20.7                   | 3               | 4           | 16                     | 2               | 2           |
| F1N5S7           | PDF         | Uncharacterized protein (Fragment)                                          | 25.763  | 5.2                    | 1               | 1           | #N/A                   | #N/A            | #N/A        |
| A7MB35           | PDHA1       | Pyruvate dehydrogenase E1 component subunit alpha, somatic form,            | 43.387  | 49                     | 19              | 57          | 31                     | 14              | 48          |
| P11966           | PDHB        | Pyruvate dehydrogenase E1 component subunit beta, mitochondrial             | 39.126  | 49                     | 14              | 36          | 21.2                   | 7               | 33          |
| P22439           | PDHX        | Pyruvate dehydrogenase protein X                                            | 53.885  | 24.6                   | 12              | 22          | 17.4                   | 9               | 34          |
| A5D7E8           | PDIA3       | PDIA3 protein                                                               | 56.929  | 77                     | 49              | 418         | 58.4                   | 35              | 324         |
| F1MEN8           | PDIA4       | Protein disulfide-isomerase A4                                              | 72.497  | 61.1                   | 52              | 238         | 50.9                   | 40              | 229         |
| Q2KIL5           | PDIA5       | Protein disulfide-isomerase A5                                              | 59.673  | 34.2                   | 19              | 42          | 22.1                   | 13              | 40          |
| A6QNL5           | PDIA6       | PDIA6 protein (Fragment)                                                    | 49.624  | 39.3                   | 19              | 46          | 28.5                   | 11              | 32          |
| E1B8C5           | PDK1        | Uncharacterized protein                                                     | 49.451  | 5                      | 1               | 2           | #N/A                   | #N/A            | #N/A        |
| A6QLG3           | PDK3        | PDK3 protein                                                                | 47.913  | 47.2                   | 17              | 37          | 23.9                   | 11              | 35          |
| A6H7E3           | PDLIM1      | PDZ and LIM domain 1                                                        | 35.82   | 23.2                   | 6               | 10          | 11                     | 3               | 4           |
| Q3T0C8           | PDLIM2      | PDZ and LIM domain protein 2                                                | 37.671  | 9.2                    | 2               | 3           | 3.2                    | 1               | 1           |
| G3MY19           | PDLIM5      | Uncharacterized protein                                                     | 58.837  | 15.6                   | 5               | 12          | 7.4                    | 3               | 5           |
| P35816           | PDP1        | [Pyruvate dehydrogenase [acetyl-transferring]]-phosphatase 1, mitochondrial | 61.184  | 18                     | 8               | 9           | 3.2                    | 2               | 2           |
| G3N1T9           | PDP2        | Uncharacterized protein                                                     | 59.579  | 6.8                    | 3               | 4           | 4.1                    | 2               | 5           |
| F1MQJ7           | PDPK1       | Uncharacterized protein (Fragment)                                          | 63.295  | 19.4                   | 11              | 13          | 12.6                   | 6               | 12          |
| O46504           | PDPR        | Pyruvate dehydrogenase phosphatase regulatory subunit, mitochondrial        | 98.856  | 14.2                   | 12              | 19          | 8.7                    | 8               | 14          |
| A6QR05           | PDSS2       | PDSS2 protein                                                               | 43.584  | 3                      | 1               | 1           | #N/A                   | #N/A            | #N/A        |

| Accession number | Gene symbol | Discription                                                   | MW(kDa) | Biological Replicate 1 |                 |             | Biological Replicate 2 |                 |             |
|------------------|-------------|---------------------------------------------------------------|---------|------------------------|-----------------|-------------|------------------------|-----------------|-------------|
|                  |             |                                                               |         | Sequence coverage(%)   | Unique peptides | MS/MS count | Sequence coverage(%)   | Unique peptides | MS/MS count |
| A7MBC2           | PDXDC1      | Pyridoxal-dependent decarboxylase domain-containing protein 1 | 86.614  | 21.1                   | 16              | 31          | 11.1                   | 9               | 16          |
| Q0II59           | PDXK        | Pyridoxal kinase                                              | 34.817  | 27.9                   | 6               | 11          | #N/A                   | #N/A            | #N/A        |
| Q3ZBF9           | PDXP        | Pyridoxal phosphate phosphatase                               | 31.749  | 50                     | 12              | 26          | 25                     | 6               | 9           |
| F1MT13           | PDZD2       | Uncharacterized protein (Fragment)                            | 278.22  | 0.7                    | 2               | 2           | 0.3                    | 1               | 3           |
| F1MWQ6           | PDZD4       | Uncharacterized protein (Fragment)                            | 84.882  | 1.6                    | 1               | 1           | #N/A                   | #N/A            | #N/A        |
| E1BPC2           | PDZD8       | Uncharacterized protein                                       | 128.49  | 0.7                    | 1               | 1           | #N/A                   | #N/A            | #N/A        |
| Q3TOX8           | PDZK1       | Na(+)/H(+) exchange regulatory cofactor NHE-RF3               | 57.175  | 14.8                   | 8               | 10          | 9                      | 5               | 8           |
| Q0VCY8           | PEA15       | Phosphoprotein enriched in                                    | 15.04   | 34.6                   | 3               | 7           | #N/A                   | #N/A            | #N/A        |
| P13696           | PEBP1       | Phosphatidylethanolamine-binding                              | 20.985  | 83.4                   | 15              | 84          | 64.2                   | 10              | 99          |
| A5D7S6           | PEF1        | PEF1 protein                                                  | 30.178  | 10.1                   | 3               | 5           | #N/A                   | #N/A            | #N/A        |
| Q58DV0           | PELO        | Protein pelota homolog                                        | 43.421  | 22.1                   | 10              | 13          | 7.5                    | 3               | 4           |
| E1BDV5           | PELP1       | Uncharacterized protein (Fragment)                            | 122.12  | 4.1                    | 3               | 4           | 2.7                    | 3               | 4           |
| F6Q234           | PEPD        | Uncharacterized protein                                       | 54.832  | 5.5                    | 3               | 7           | #N/A                   | #N/A            | #N/A        |
| E1BPU3           | PEX1        | Uncharacterized protein                                       | 142.15  | #N/A                   | #N/A            | #N/A        | 3.1                    | 4               | 6           |
| Q0VCP2           | PEX11A      | Peroxisomal membrane protein 11A                              | 28.297  | 7.3                    | 2               | 3           | #N/A                   | #N/A            | #N/A        |
| Q148K5           | PEX11B      | Peroxisomal membrane protein 11B                              | 28.278  | 22.1                   | 6               | 9           | #N/A                   | #N/A            | #N/A        |
| A1L567           | PEX14       | Peroxisomal biogenesis factor 14                              | 32.546  | 16.6                   | 6               | 9           | 11.5                   | 4               | 11          |
| Q2KII7           | PEX16       | Peroxisomal membrane protein PEX16                            | 37.573  | 16.5                   | 5               | 6           | #N/A                   | #N/A            | #N/A        |
| Q3SZD1           | PEX19       | Peroxisomal biogenesis factor 19                              | 32.667  | #N/A                   | #N/A            | #N/A        | 6                      | 1               | 1           |
| A6QPK4           | PEX26       | PEX26 protein                                                 | 29.112  | 5.6                    | 1               | 1           | 8.2                    | 3               | 4           |
| F1N5H3           | PEX3        | Peroxisomal biogenesis factor 3                               | 42.102  | 16.6                   | 6               | 10          | 7                      | 3               | 7           |
| Q1RMV0           | PEX5        | Peroxisomal targeting signal 1                                | 70.877  | 25.9                   | 11              | 16          | 6.9                    | 4               | 10          |
| E1B8F6           | PEX6        | Uncharacterized protein                                       | 103.78  | 5.1                    | 4               | 7           | 5.9                    | 6               | 8           |
| F1N4K1           | PFAS        | Uncharacterized protein                                       | 144.17  | 10.5                   | 9               | 16          | #N/A                   | #N/A            | #N/A        |
| Q3SZE2           | PFDN1       | Prefoldin subunit 1                                           | 14.223  | 35.2                   | 5               | 8           | 29.5                   | 4               | 9           |
| A1A4P5           | PFDN2       | Prefoldin subunit 2                                           | 16.648  | 44.8                   | 6               | 8           | 28.6                   | 4               | 13          |
| F1MYY3           | PFDN4       | Prefoldin subunit 4 (Fragment)                                | 15.303  | 9                      | 1               | 3           | #N/A                   | #N/A            | #N/A        |
| Q8HYI9           | PFDN5       | Prefoldin subunit 5                                           | 17.385  | 51.9                   | 7               | 15          | 19.5                   | 3               | 13          |
| Q17Q89           | PFDN6       | Prefoldin subunit 6                                           | 14.554  | 14                     | 2               | 3           | 22.5                   | 3               | 6           |
| A1A4J1           | PFKL        | 6-phosphofructokinase, liver type                             | 85.291  | 18.7                   | 8               | 17          | 5.8                    | 2               | 3           |



| Accession number | Gene symbol | Discription                                           | MW(kDa) | Biological Replicate 1 |                 |             | Biological Replicate 2 |                 |             |
|------------------|-------------|-------------------------------------------------------|---------|------------------------|-----------------|-------------|------------------------|-----------------|-------------|
|                  |             |                                                       |         | Sequence coverage(%)   | Unique peptides | MS/MS count | Sequence coverage(%)   | Unique peptides | MS/MS count |
| Q0IIG5           | PFKM        | 6-phosphofructokinase, muscle type                    | 85.293  | 12.3                   | 7               | 11          | 5.8                    | 3               | 7           |
| Q09430           | PFN2        | Profilin-2                                            | 15.032  | 50.7                   | 8               | 15          | 27.9                   | 3               | 4           |
| Q3SZ62           | PGAM1       | Phosphoglycerate mutase 1                             | 28.852  | 59.4                   | 13              | 48          | 36.2                   | 8               | 20          |
| E1BNQ0           | PGAP1       | Uncharacterized protein                               | 104.84  | 3.5                    | 4               | 7           | 5.3                    | 6               | 8           |
| Q3ZCI4           | PGD         | 6-phosphogluconate dehydrogenase, decarboxylating     | 53.076  | 48.7                   | 19              | 50          | 20.1                   | 9               | 26          |
| Q3TOP6           | PGK1        | Phosphoglycerate kinase 1                             | 44.537  | 68.1                   | 26              | 74          | 22.5                   | 10              | 40          |
| F1MM83           | PGLS        | 6-phosphogluconolactonase                             | 27.531  | 56.2                   | 11              | 32          | 28.7                   | 6               | 19          |
| Q08DP0           | PGM1        | Phosphoglucomutase-1                                  | 61.589  | 31.5                   | 16              | 25          | 15.8                   | 9               | 14          |
| A6QQ11           | PGM2        | PGM2 protein (Fragment)                               | 69.581  | 7.5                    | 5               | 7           | 2.6                    | 2               | 3           |
| A5PKH8           | PGM2L1      | PGM2L1 protein                                        | 70.419  | 29.6                   | 17              | 23          | 13.3                   | 9               | 16          |
| F1MS56           | PGM3        | Uncharacterized protein                               | 59.949  | 25.8                   | 12              | 31          | 13.3                   | 7               | 20          |
| Q2T9S4           | PGP         | Phosphoglycolate phosphatase                          | 34.32   | 34                     | 10              | 28          | 19.3                   | 5               | 13          |
| Q17QC0           | PGRMC1      | Membrane-associated progesterone receptor component 1 | 21.622  | 21.1                   | 5               | 8           | 28.4                   | 5               | 14          |
| A5PJQ6           | PGRMC2      | PGRMC2 protein                                        | 23.71   | 29.6                   | 6               | 12          | 23.3                   | 4               | 10          |
| Q2KJ28           | PGS1        | CDP-diacylglycerol--glycerol-3-phosphate 3-           | 62.732  | 34.2                   | 16              | 46          | 16.7                   | 9               | 29          |
| F1MVP7           | PHACTR3     | Phosphatase and actin regulator                       | 59.743  | 14.7                   | 6               | 12          | 10                     | 5               | 10          |
| Q3T165           | PHB         | Prohibitin                                            | 29.804  | 83.1                   | 19              | 46          | 43.8                   | 12              | 47          |
| Q2HJ97           | PHB2        | Prohibitin-2                                          | 33.357  | 75.3                   | 22              | 88          | 57.2                   | 19              | 73          |
| E1BKS5           | PHEX        | Uncharacterized protein                               | 83.932  | 16.4                   | 10              | 17          | 2.9                    | 2               | 4           |
| Q32PA4           | PHPT1       | 14 kDa phosphohistidine phosphatase                   | 13.93   | 65.6                   | 10              | 20          | 42.4                   | 5               | 11          |
| Q0IIB1           | PHYHD1      | Phytanoyl-CoA dioxygenase domain-containing protein 1 | 32.539  | 27.5                   | 5               | 17          | 12.4                   | 3               | 8           |
| Q32L96           | PHYHIPL     | Phytanoyl-CoA hydroxylase interacting protein-like    | 42.562  | 8.5                    | 4               | 6           | 4.8                    | 2               | 5           |
| A6QLN5           | PI4K2A      | PI4K2A protein                                        | 54.084  | 36.3                   | 15              | 23          | 16.3                   | 8               | 21          |
| F1N605           | PICALM      | Uncharacterized protein (Fragment)                    | 66.95   | 10.1                   | 3               | 5           | #N/A                   | #N/A            | #N/A        |
| Q2T9M1           | PICK1       | PRKCA-binding protein                                 | 46.729  | 4.8                    | 2               | 3           | #N/A                   | #N/A            | #N/A        |
| Q3MHZ7           | PIGK        | GPI-anchor transamidase                               | 45.172  | 8.9                    | 3               | 5           | 2.5                    | 1               | 2           |
| E1BM45           | PIGN        | Uncharacterized protein                               | 105.38  | 1.3                    | 1               | 1           | #N/A                   | #N/A            | #N/A        |

| Accession number | Gene symbol | Discription                                                       | MW(kDa) | Biological Replicate 1 |                 |             | Biological Replicate 2 |                 |             |
|------------------|-------------|-------------------------------------------------------------------|---------|------------------------|-----------------|-------------|------------------------|-----------------|-------------|
|                  |             |                                                                   |         | Sequence coverage(%)   | Unique peptides | MS/MS count | Sequence coverage(%)   | Unique peptides | MS/MS count |
| Q32PC8           | PIGP        | Phosphatidylinositol glycan anchor biosynthesis, class P          | 14.717  | #N/A                   | #N/A            | #N/A        | 7.8                    | 1               | 3           |
| Q3SZL5           | PIGS        | GPI transamidase component PIG-S                                  | 61.785  | 14.2                   | 7               | 13          | 5                      | 3               | 6           |
| F1N4W0           | PIGT        | Uncharacterized protein                                           | 65.337  | 10.9                   | 6               | 7           | 8.3                    | 5               | 11          |
| F1N7F8           | PIGU        | Uncharacterized protein                                           | 50.011  | 2.5                    | 1               | 2           | 4.8                    | 2               | 4           |
| Q1LZA4           | PIGW        | Phosphatidylinositol-glycan biosynthesis class W protein          | 56.298  | #N/A                   | #N/A            | #N/A        | 1.6                    | 1               | 1           |
| G3N1V8           | PIGX        | Uncharacterized protein (Fragment)                                | 30.181  | 3.4                    | 1               | 2           | #N/A                   | #N/A            | #N/A        |
| Q0VCI6           | PIH1D1      | PIH1 domain-containing protein 1                                  | 32.415  | 13.4                   | 3               | 6           | 6.2                    | 2               | 3           |
| F1MYM3           | PIK3CB      | Uncharacterized protein                                           | 122.94  | 2.3                    | 2               | 2           | 1.4                    | 2               | 2           |
| P23727           | PIK3R1      | Phosphatidylinositol 3-kinase regulatory subunit alpha            | 83.496  | 4.4                    | 2               | 2           | 3.2                    | 1               | 1           |
| Q5BIN5           | PIN1        | Peptidyl-prolyl cis-trans isomerase NIMA-interacting 1            | 18.273  | 26.4                   | 3               | 4           | 4.9                    | 1               | 3           |
| G3X6D7           | PIP4K2C     | Phosphatidylinositol 5-phosphate 4-kinase type-2 gamma (Fragment) | 41.206  | 20.9                   | 8               | 10          | 6.3                    | 3               | 5           |
| A6QQH1           | PIR         | PIR protein                                                       | 32.06   | 13.5                   | 5               | 5           | #N/A                   | #N/A            | #N/A        |
| Q2HJ54           | PITPNA      | Phosphatidylinositol transfer protein alpha isoform               | 31.849  | 60                     | 16              | 38          | 28.5                   | 8               | 14          |
| Q9TR36           | PITPNB      | Phosphatidylinositol transfer protein beta isoform                | 31.539  | 13.3                   | 2               | 2           | #N/A                   | #N/A            | #N/A        |
| F1MFA3           | PITRM1      | Uncharacterized protein                                           | 116.38  | 7.6                    | 6               | 7           | 4.6                    | 5               | 7           |
| E1B838           | PIWIL3      | Uncharacterized protein                                           | 101.05  | 37                     | 31              | 61          | 17.9                   | 18              | 37          |
| A5D984           | PKM2        | Pyruvate kinase                                                   | 57.948  | 81                     | 45              | 234         | 51.2                   | 26              | 113         |
| Q8WMP9           | PLA2G15     | Group XV phospholipase A2                                         | 46.061  | 23.6                   | 8               | 21          | 3.4                    | 1               | 2           |
| F1MNU5           | PLA2G4F     | Uncharacterized protein                                           | 94.347  | 22                     | 14              | 28          | 9.5                    | 8               | 18          |
| A7Z055           | PLAA        | PLAA protein                                                      | 87.12   | 60.6                   | 42              | 183         | 36.1                   | 25              | 90          |
| F1MRH1           | PLB1        | Uncharacterized protein (Fragment)                                | 160.79  | 4.1                    | 5               | 5           | #N/A                   | #N/A            | #N/A        |
| Q2KIY5           | PLBD2       | Putative phospholipase B-like 2                                   | 65.692  | 22.8                   | 16              | 26          | 13.8                   | 8               | 14          |
| E1BHX7           | PLCB3       | Uncharacterized protein                                           | 139.27  | 3.2                    | 3               | 3           | #N/A                   | #N/A            | #N/A        |
| F1N4C7           | PLCG2       | Uncharacterized protein (Fragment)                                | 140.24  | 16.9                   | 17              | 29          | 2.9                    | 3               | 9           |
| F1MF11           | PLCH1       | Uncharacterized protein (Fragment)                                | 186.92  | 1.1                    | 2               | 6           | 0.5                    | 1               | 5           |

| Accession number | Gene symbol | Discription                                      | MW(kDa) | Biological Replicate 1 |                 |             | Biological Replicate 2 |                 |             |
|------------------|-------------|--------------------------------------------------|---------|------------------------|-----------------|-------------|------------------------|-----------------|-------------|
|                  |             |                                                  |         | Sequence coverage(%)   | Unique peptides | MS/MS count | Sequence coverage(%)   | Unique peptides | MS/MS count |
| Q2KJJ8           | PLD3        | Phospholipase D3                                 | 54.619  | 5.9                    | 3               | 4           | #N/A                   | #N/A            | #N/A        |
| E1BE10           | PLD6        | Mitochondrial cardiolipin hydrolase              | 25.15   | 15                     | 3               | 5           | 7.3                    | 2               | 2           |
| F1MKZ7           | PLEKHA7     | Uncharacterized protein                          | 132.09  | 4                      | 4               | 4           | 0.9                    | 1               | 2           |
| A4FV32           | PLEKHB2     | PLEKHB2 protein                                  | 24.835  | #N/A                   | #N/A            | #N/A        | 3.2                    | 1               | 2           |
| F1MRP8           | PLEKHG1     | Uncharacterized protein                          | 153.62  | 6.9                    | 9               | 19          | 3.3                    | 5               | 8           |
| E1BEX3           | PLEKHG4     | Uncharacterized protein                          | 132.21  | 1                      | 1               | 2           | #N/A                   | #N/A            | #N/A        |
| F1MQB0           | PLIN2       | Perilipin                                        | 45.106  | 60.1                   | 21              | 50          | 25.3                   | 12              | 38          |
| Q2TA25           | PLK1        | Serine/threonine-protein kinase                  | 68      | 13.5                   | 7               | 11          | 9.8                    | 6               | 12          |
| F1MET0           | PLOD3       | Uncharacterized protein                          | 85.895  | 3.6                    | 2               | 3           | #N/A                   | #N/A            | #N/A        |
| Q6Y1E2           | PLP2        | Proteolipid protein 2                            | 16.645  | #N/A                   | #N/A            | #N/A        | 8.6                    | 1               | 1           |
| A6H742           | PLS1        | Plastin-1                                        | 70.531  | 32.7                   | 15              | 26          | 9.2                    | 5               | 17          |
| A7E3Q8           | PLS3        | Plastin-3                                        | 70.797  | 6.2                    | 0               | 1           | 4.1                    | 1               | 1           |
| Q3SZJ9           | PMM2        | Phosphomannomutase 2                             | 27.997  | 28                     | 7               | 8           | 8.5                    | 2               | 3           |
| Q0P5M8           | PMPCA       | Mitochondrial-processing peptidase subunit alpha | 58.134  | 17.9                   | 10              | 15          | 11                     | 6               | 13          |
| Q3SZ71           | PMPCB       | Mitochondrial-processing peptidase subunit beta  | 54.236  | 17.1                   | 9               | 16          | 13.7                   | 7               | 21          |
| A7YY46           | PNKD        | Probable hydrolase PNKD                          | 42.884  | 8.8                    | 4               | 7           | 11.2                   | 4               | 7           |
| F1N3Q9           | PNKP        | Uncharacterized protein                          | 57.361  | 4.2                    | 2               | 2           | 2.9                    | 1               | 1           |
| F1MX01           | PNLDC1      | Uncharacterized protein                          | 61.195  | 33.5                   | 18              | 50          | 14.1                   | 9               | 39          |
| E1BMJ5           | PNPLA6      | Uncharacterized protein                          | 145.63  | 1.9                    | 2               | 2           | 4.8                    | 5               | 5           |
| E1BE78           | PNPLA8      | Uncharacterized protein                          | 88.617  | #N/A                   | #N/A            | #N/A        | 2.4                    | 2               | 2           |
| Q5E9K3           | PNPO        | Pyridoxine-5-phosphate oxidase                   | 30.365  | 6.9                    | 1               | 1           | 3.1                    | 1               | 1           |
| E1BIQ0           | PNPT1       | Uncharacterized protein                          | 85.901  | 17.1                   | 14              | 21          | 11.1                   | 10              | 19          |
| F1MPI4           | POFUT2      | Uncharacterized protein                          | 52.869  | 10                     | 3               | 4           | #N/A                   | #N/A            | #N/A        |
| F1XS4            | POLA2       | DNA polymerase alpha subunit B                   | 66.414  | 1.8                    | 1               | 1           | 3                      | 2               | 2           |
| P28339           | POLD1       | DNA polymerase delta catalytic                   | 123.71  | 9.5                    | 9               | 13          | 6.6                    | 8               | 9           |
| P49004           | POLD2       | DNA polymerase delta subunit 2                   | 50.997  | 25.2                   | 9               | 15          | 3.8                    | 2               | 2           |
| G1K1U4           | POLD3       | DNA polymerase delta subunit 3                   | 51.379  | 13.4                   | 6               | 8           | 7.1                    | 3               | 4           |
| A5D9H9           | POLDIP2     | DNA polymerase delta interacting                 | 41.942  | 25                     | 6               | 8           | #N/A                   | #N/A            | #N/A        |
| Q3SZN5           | POLE3       | DNA polymerase epsilon subunit 3                 | 16.859  | 7.5                    | 1               | 1           | #N/A                   | #N/A            | #N/A        |
| A6QQ14           | POLE4       | DNA polymerase epsilon subunit 4                 | 12.064  | 9.5                    | 1               | 1           | #N/A                   | #N/A            | #N/A        |

| Accession number | Gene symbol | Discription                                                         | MW(kDa) | Biological Replicate 1 |                 |             | Biological Replicate 2 |                 |             |
|------------------|-------------|---------------------------------------------------------------------|---------|------------------------|-----------------|-------------|------------------------|-----------------|-------------|
|                  |             |                                                                     |         | Sequence coverage(%)   | Unique peptides | MS/MS count | Sequence coverage(%)   | Unique peptides | MS/MS count |
| E1BDI3           | POLG        | Uncharacterized protein                                             | 136.11  | 8                      | 8               | 13          | #N/A                   | #N/A            | #N/A        |
| Q0VC30           | POLG2       | DNA polymerase subunit gamma-2, mitochondrial                       | 54.662  | 16.7                   | 8               | 9           | 10.3                   | 5               | 10          |
| F1MHR0           | POLI        | Uncharacterized protein                                             | 78.592  | 3.7                    | 3               | 3           | 1.3                    | 1               | 2           |
| F1MPJ5           | POLM        | Uncharacterized protein (Fragment)                                  | 52.876  | 4.7                    | 2               | 2           | #N/A                   | #N/A            | #N/A        |
| A5PJW8           | POLR2B      | DNA-directed RNA polymerase                                         | 133.87  | 2.6                    | 3               | 6           | 0.8                    | 1               | 2           |
| Q3T0Q3           | POLR2C      | DNA-directed RNA polymerase II subunit RPB3                         | 31.429  | 14.9                   | 3               | 5           | #N/A                   | #N/A            | #N/A        |
| Q2T9T3           | POLR2E      | DNA-directed RNA polymerases I, II, and III subunit RPABC1          | 24.481  | 4.3                    | 1               | 1           | 4.3                    | 1               | 1           |
| Q5E9B8           | POLR2G      | DNA-directed RNA polymerase II subunit RPB7                         | 19.294  | 4.7                    | 1               | 1           | #N/A                   | #N/A            | #N/A        |
| F2Z4H3           | POLR2H      | Uncharacterized protein                                             | 17.143  | 18                     | 1               | 1           | #N/A                   | #N/A            | #N/A        |
| Q5NDF2           | POMGNT2     | Protein O-linked-mannose beta-1,4-N-acetylglucosaminyltransferase 2 | 66.066  | 10.5                   | 4               | 5           | 1.9                    | 1               | 1           |
| Q0MVC9           | POMT1       | POMT1 protein                                                       | 82.745  | 1.8                    | 1               | 1           | #N/A                   | #N/A            | #N/A        |
| Q58DS7           | PON2        | Serum paraoxonase/arylesterase 2                                    | 39.421  | 5.1                    | 2               | 4           | 7.9                    | 2               | 2           |
| Q3SYT8           | POR         | NADPH--cytochrome P450 reductase                                    | 77.02   | 44.4                   | 25              | 63          | 25.4                   | 20              | 50          |
| P37980           | PPA1        | Inorganic pyrophosphatase                                           | 32.814  | 85.8                   | 23              | 116         | 24.6                   | 6               | 21          |
| Q2KIV7           | PPA2        | Pyrophosphatase (Inorganic) 2                                       | 36.963  | 10.4                   | 2               | 2           | 8.3                    | 2               | 3           |
| F1MV22           | PPAT        | Amidophosphoribosyltransferase                                      | 59.899  | 9.3                    | 5               | 9           | 3.3                    | 2               | 5           |
| A6QPS1           | PPCS        | PPCS protein                                                        | 22.591  | 21.1                   | 6               | 11          | 17.8                   | 5               | 13          |
| F1MBQ1           | PPEF1       | Serine/threonine-protein phosphatase (Fragment)                     | 74.829  | 1.5                    | 1               | 4           | 1.5                    | 1               | 2           |
| E1BIA1           | PPFIA3      | Uncharacterized protein                                             | 133.74  | 0.8                    | 1               | 3           | #N/A                   | #N/A            | #N/A        |
| P62935           | PPIA        | Peptidyl-prolyl cis-trans isomerase                                 | 17.869  | 82.3                   | 14              | 100         | 58.5                   | 11              | 47          |
| P80311           | PPIB        | Peptidyl-prolyl cis-trans isomerase                                 | 23.743  | 63.4                   | 16              | 80          | 55.6                   | 13              | 82          |
| P26882           | PPID        | Peptidyl-prolyl cis-trans isomerase                                 | 40.62   | 51.1                   | 19              | 57          | 30.3                   | 12              | 35          |
| P30404           | PPIF        | Peptidyl-prolyl cis-trans isomerase F, mitochondrial                | 22.019  | 38.9                   | 6               | 14          | 23.1                   | 5               | 13          |
| Q0P5D0           | PPIH        | Peptidyl-prolyl cis-trans isomerase                                 | 19.208  | 28.2                   | 5               | 13          | #N/A                   | #N/A            | #N/A        |
| Q5E992           | PPIL1       | Peptidyl-prolyl cis-trans                                           | 18.237  | #N/A                   | #N/A            | #N/A        | 9                      | 2               | 3           |





| Accession number | Gene symbol | Discription                                                    | MW(kDa) | Biological Replicate 1 |                 |             | Biological Replicate 2 |                 |             |
|------------------|-------------|----------------------------------------------------------------|---------|------------------------|-----------------|-------------|------------------------|-----------------|-------------|
|                  |             |                                                                |         | Sequence coverage(%)   | Unique peptides | MS/MS count | Sequence coverage(%)   | Unique peptides | MS/MS count |
| P00515           | PRKAR2A     | cAMP-dependent protein kinase type II-alpha regulatory subunit | 45.093  | 16.5                   | 4               | 6           | 2.2                    | 1               | 3           |
| P31322           | PRKAR2B     | cAMP-dependent protein kinase type II-beta regulatory subunit  | 46.335  | 8.1                    | 2               | 2           | 8.6                    | 3               | 3           |
| F1MZ0            | PRKCD       | Protein kinase C delta type                                    | 77.327  | 2.7                    | 1               | 1           | 1.5                    | 1               | 3           |
| Q28034           | PRKCSH      | Glucosidase 2 subunit beta                                     | 60.151  | 27.8                   | 18              | 50          | 17.8                   | 14              | 53          |
| A0JNH7           | PRKCZ       | Protein kinase C, zeta                                         | 67.732  | 2.5                    | 1               | 1           | #N/A                   | #N/A            | #N/A        |
| Q2HJ92           | PRKRA       | Interferon-inducible double-stranded RNA-dependent protein     | 34.413  | 9.6                    | 3               | 3           | 3.2                    | 1               | 4           |
| F1N443           | PRMT5       | Protein arginine N-                                            | 72.644  | 40.3                   | 22              | 50          | 11.6                   | 9               | 20          |
| F1MQX7           | PRMT7       | Protein arginine N-                                            | 78.722  | 7.8                    | 4               | 6           | #N/A                   | #N/A            | #N/A        |
| G3N3Y2           | PRODH       | Proline dehydrogenase 1,                                       | 60.062  | 2.6                    | 1               | 1           | #N/A                   | #N/A            | #N/A        |
| F1MK52           | PROM1       | Uncharacterized protein                                        | 99.624  | 2.3                    | 2               | 3           | 3                      | 3               | 4           |
| E1BM92           | PROM2       | Uncharacterized protein                                        | 91.52   | 2                      | 1               | 1           | 3                      | 3               | 3           |
| Q3T0G5           | PROSC       | Proline synthase co-transcribed bacterial homolog protein      | 29.943  | 7.3                    | 2               | 3           | #N/A                   | #N/A            | #N/A        |
| A8E4M9           | PRPF39      | PRPF39 protein                                                 | 64.282  | 4.9                    | 3               | 3           | #N/A                   | #N/A            | #N/A        |
| Q3MHE2           | PRPF4       | U4/U6 small nuclear                                            | 58.398  | 1.9                    | 1               | 1           | #N/A                   | #N/A            | #N/A        |
| Q2KJJ0           | PRPF6       | Pre-mRNA-processing factor 6                                   | 106.68  | 2.1                    | 2               | 2           | 1.8                    | 2               | 2           |
| Q2HJ58           | PRPS1       | Ribose-phosphate pyrophosphokinase                             | 34.834  | 25.5                   | 6               | 11          | 23                     | 6               | 20          |
| G3MY14           | PRPS2       | Uncharacterized protein (Fragment)                             | 23.556  | 15.3                   | 1               | 1           | 10.6                   | 1               | 3           |
| Q08DW2           | PRPSAP1     | Phosphoribosyl pyrophosphate synthase-associated protein 1     | 39.423  | 26.4                   | 6               | 12          | 14.9                   | 5               | 9           |
| A2VDS0           | PRPSAP2     | Phosphoribosyl pyrophosphate synthase-associated protein 2     | 40.714  | 7.6                    | 1               | 1           | #N/A                   | #N/A            | #N/A        |
| F1N116           | PRSS53      | Uncharacterized protein                                        | 59.242  | 6.5                    | 2               | 5           | 2.9                    | 1               | 2           |
| E1BMA1           | PRTG        | Uncharacterized protein (Fragment)                             | 114.33  | 0.9                    | 1               | 2           | #N/A                   | #N/A            | #N/A        |
| Q5E9Y6           | PRUNE       | Protein prune homolog                                          | 50.08   | 2                      | 1               | 3           | #N/A                   | #N/A            | #N/A        |
| Q9XT96           | PSEN2       | Presenilin-2                                                   | 50.271  | 2                      | 1               | 1           | #N/A                   | #N/A            | #N/A        |
| Q3TOX5           | PSMA1       | Proteasome subunit alpha type-1                                | 29.585  | 44.1                   | 12              | 23          | 31.6                   | 9               | 22          |
| Q3TOY5           | PSMA2       | Proteasome subunit alpha type-2                                | 25.898  | 34.6                   | 6               | 10          | 10.7                   | 2               | 4           |
| Q58DU5           | PSMA3       | Proteasome subunit alpha type-3                                | 28.405  | 37.3                   | 11              | 18          | 17.6                   | 6               | 14          |







| Accession number | Gene symbol | Discription                                                           | MW(kDa) | Biological Replicate 1 |                 |             | Biological Replicate 2 |                 |             |
|------------------|-------------|-----------------------------------------------------------------------|---------|------------------------|-----------------|-------------|------------------------|-----------------|-------------|
|                  |             |                                                                       |         | Sequence coverage(%)   | Unique peptides | MS/MS count | Sequence coverage(%)   | Unique peptides | MS/MS count |
| Q2KIP8           | PTPLB       | Very-long-chain (3R)-3-hydroxyacyl-[acyl-carrier protein] dehydratase | 28.422  | #N/A                   | #N/A            | #N/A        | 8.3                    | 2               | 2           |
| Q2NKZ7           | PTPMT1      | Protein tyrosine phosphatase, mitochondrial 1                         | 29.262  | 7.8                    | 2               | 3           | 8.1                    | 3               | 4           |
| A6QQN2           | PTPN1       | Tyrosine-protein phosphatase non-receptor type                        | 49.037  | 5.4                    | 2               | 4           | 6.4                    | 3               | 5           |
| F1N339           | PTPN11      | Tyrosine-protein phosphatase non-receptor type                        | 68.441  | 5                      | 3               | 4           | #N/A                   | #N/A            | #N/A        |
| F1N6W1           | PTPN9       | Uncharacterized protein (Fragment)                                    | 71.322  | 3.2                    | 2               | 2           | #N/A                   | #N/A            | #N/A        |
| F1MJR2           | PTPRD       | Uncharacterized protein (Fragment)                                    | 199.3   | 0.7                    | 1               | 1           | #N/A                   | #N/A            | #N/A        |
| Q3ZBL5           | PTRH2       | Peptidyl-tRNA hydrolase 2,                                            | 19.29   | 24                     | 3               | 4           | 29.1                   | 4               | 6           |
| Q3SZ85           | PTRHD1      | Putative peptidyl-tRNA hydrolase                                      | 15.972  | 43.6                   | 6               | 14          | 27.9                   | 4               | 8           |
| F1MX94           | PTS         | 6-pyruvoyl tetrahydrobiopterin                                        | 16.363  | 28.3                   | 4               | 4           | 6.2                    | 1               | 2           |
| Q3SZY3           | PTTG1       | Securin                                                               | 22.131  | 7.4                    | 3               | 4           | #N/A                   | #N/A            | #N/A        |
| F1N238           | PUF60       | Poly(U)-binding-splicing factor                                       | 57.043  | #N/A                   | #N/A            | #N/A        | 2.8                    | 2               | 2           |
| A6QP68           | PUSL1       | tRNA pseudouridine synthase                                           | 34.022  | 14.7                   | 5               | 10          | 9.6                    | 3               | 3           |
| Q2HJ56           | PWP1        | Periodic tryptophan protein 1                                         | 55.864  | #N/A                   | #N/A            | #N/A        | 3.8                    | 2               | 2           |
| A5PJQ7           | PXK         | PXK protein                                                           | 65.075  | 2.8                    | 1               | 1           | #N/A                   | #N/A            | #N/A        |
| Q2KIY1           | PXMP2       | Peroxisomal membrane protein 2                                        | 22.258  | 21.4                   | 6               | 14          | 17.3                   | 5               | 11          |
| F1MFD1           | PXN         | Uncharacterized protein (Fragment)                                    | 63.856  | 7                      | 4               | 8           | 5.1                    | 4               | 7           |
| Q58DT4           | PYCR1       | Pyrroline-5-carboxylate reductase 1, mitochondrial                    | 33.453  | #N/A                   | #N/A            | #N/A        | 3.4                    | 1               | 2           |
| Q58D08           | PYCRL       | Pyrroline-5-carboxylate reductase 3                                   | 32.035  | 40.3                   | 11              | 17          | 14.9                   | 4               | 8           |
| Q3B7M9           | PYGB        | Glycogen phosphorylase, brain form                                    | 96.339  | 35.5                   | 27              | 48          | 10.3                   | 8               | 16          |
| Q0VCM4           | PYGL        | Glycogen phosphorylase, liver form                                    | 97.455  | #N/A                   | #N/A            | #N/A        | 2.2                    | 1               | 1           |
| Q3TOZ7           | QDPR        | Dihydropteridine reductase                                            | 25.504  | 62.4                   | 11              | 51          | 40.1                   | 7               | 33          |
| Q0V8G3           | QPCTL       | Glutaminyl-peptide cyclotransferase-like protein                      | 42.897  | 7.8                    | 4               | 6           | 8.1                    | 3               | 6           |
| P83862           | QRFP        | Orexigenic neuropeptide QRFP                                          | 14.566  | 9                      | 2               | 2           | #N/A                   | #N/A            | #N/A        |
| F1MM32           | QSOX1       | Sulfhydryl oxidase                                                    | 62.886  | 3.9                    | 2               | 3           | 1.6                    | 1               | 1           |
| E1BBS6           | QSOX2       | Sulfhydryl oxidase (Fragment)                                         | 75.364  | 13.7                   | 8               | 10          | 3.7                    | 3               | 3           |
| A6H7F4           | QTRTD1      | QTRTD1 protein                                                        | 37.511  | 4.7                    | 1               | 2           | #N/A                   | #N/A            | #N/A        |

| Accession number | Gene symbol | Discription                        | MW(kDa) | Biological Replicate 1 |                 |             | Biological Replicate 2 |                 |             |
|------------------|-------------|------------------------------------|---------|------------------------|-----------------|-------------|------------------------|-----------------|-------------|
|                  |             |                                    |         | Sequence coverage(%)   | Unique peptides | MS/MS count | Sequence coverage(%)   | Unique peptides | MS/MS count |
| A6QLS9           | RAB10       | RAB10 protein                      | 22.541  | 63                     | 11              | 42          | 32                     | 6               | 17          |
| Q3MHP2           | RAB11B      | Ras-related protein Rab-11B        | 24.488  | 66.1                   | 13              | 47          | 52.3                   | 11              | 59          |
| E1BNE5           | RAB11FIP5   | Uncharacterized protein            | 137.79  | #N/A                   | #N/A            | #N/A        | 1.3                    | 2               | 3           |
| Q3ZBG1           | RAB14       | RAB14 protein                      | 23.897  | 73                     | 12              | 25          | 15.8                   | 4               | 9           |
| Q1RMR4           | RAB15       | Ras-related protein Rab-15         | 24.424  | 20.8                   | 3               | 5           | 17.5                   | 3               | 5           |
| Q0IIG8           | RAB18       | Ras-related protein Rab-18         | 22.991  | 48.5                   | 9               | 14          | 41.7                   | 8               | 30          |
| A1L528           | RAB1A       | RAB1A, member RAS oncogene family  | 22.677  | 78.5                   | 7               | 22          | 60                     | 6               | 74          |
| Q2HJH2           | RAB1B       | Ras-related protein Rab-1B         | 22.202  | 81.6                   | 7               | 90          | 62.2                   | 5               | 16          |
| Q17R06           | RAB21       | Ras-related protein Rab-21         | 24.146  | 45.5                   | 11              | 28          | 29.3                   | 7               | 23          |
| F1MHP4           | RAB22A      | Uncharacterized protein            | 21.798  | 60.3                   | 10              | 15          | 30.4                   | 5               | 10          |
| E1B771           | RAB24       | Uncharacterized protein            | 23.383  | 12.7                   | 1               | 2           | 4.4                    | 1               | 3           |
| Q58DW6           | RAB25       | Ras-related protein Rab-25         | 23.536  | 13.6                   | 2               | 3           | 22.1                   | 4               | 11          |
| A6QLB1           | RAB27A      | RAB27A protein                     | 24.978  | 32.6                   | 7               | 16          | 31.7                   | 7               | 34          |
| Q3SWY9           | RAB28       | Ras-related protein Rab-28         | 24.743  | 5                      | 1               | 1           | #N/A                   | #N/A            | #N/A        |
| Q148J4           | RAB2A       | RAB2A, member RAS oncogene family  | 20.85   | 64.6                   | 5               | 51          | 34.4                   | 2               | 29          |
| E1BC58           | RAB2B       | Uncharacterized protein            | 24.167  | 47.2                   | 2               | 3           | 35.2                   | 2               | 5           |
| Q17QB7           | RAB30       | Ras-related protein Rab-30         | 23.058  | 20.7                   | 5               | 7           | 7.9                    | 1               | 2           |
| E1BA60           | RAB32       | Uncharacterized protein            | 24.89   | 51.6                   | 10              | 36          | 33.3                   | 7               | 20          |
| F1MSJ9           | RAB35       | Uncharacterized protein            | 23.011  | 26.4                   | 5               | 14          | 21.9                   | 5               | 16          |
| E1BLD5           | RAB37       | Uncharacterized protein            | 24.348  | 6.5                    | 1               | 1           | #N/A                   | #N/A            | #N/A        |
| G3X7D3           | RAB39       | Uncharacterized protein            | 24.98   | 6                      | 1               | 1           | #N/A                   | #N/A            | #N/A        |
| Q17QU4           | RAB39B      | Ras-related protein Rab-39B        | 24.608  | 7.5                    | 1               | 1           | #N/A                   | #N/A            | #N/A        |
| P11023           | RAB3A       | Ras-related protein Rab-3A         | 24.954  | 25.5                   | 1               | 3           | 14.1                   | 1               | 7           |
| P10948           | RAB3B       | Ras-related protein Rab-3B         | 24.766  | 17.4                   | 2               | 2           | #N/A                   | #N/A            | #N/A        |
| E1BF18           | RAB3C       | Ras-related protein Rab-3C         | 24.842  | 38.5                   | 5               | 14          | 19.7                   | 3               | 8           |
| E1BNX1           | RAB3D       | Uncharacterized protein            | 24.387  | 33.3                   | 3               | 14          | 28.8                   | 4               | 18          |
| A4FUE5           | RAB3GAP1    | RAB3GAP1 protein                   | 110.71  | 16                     | 14              | 23          | 8.8                    | 9               | 11          |
| G5E601           | RAB3GAP2    | Uncharacterized protein            | 155.62  | 12.9                   | 17              | 27          | 7.3                    | 10              | 16          |
| Q2KI32           | RAB3IP      | RAB3A interacting protein (Rabin3) | 51.026  | 32.8                   | 14              | 29          | 12                     | 6               | 13          |
| Q2TBH7           | RAB4A       | Ras-related protein Rab-4A         | 24.392  | 24.8                   | 4               | 7           | 9.6                    | 2               | 4           |
| Q0IIG7           | RAB5A       | Ras-related protein Rab-5A         | 23.688  | 57.2                   | 5               | 14          | 30.2                   | 2               | 2           |
| F1MNI4           | RAB5B       | Uncharacterized protein (Fragment) | 25.153  | 64.2                   | 7               | 63          | 38.9                   | 4               | 43          |

| Accession number | Gene symbol | Discription                                                                            | MW(kDa) | Biological Replicate 1 |                 |             | Biological Replicate 2 |                 |             |
|------------------|-------------|----------------------------------------------------------------------------------------|---------|------------------------|-----------------|-------------|------------------------|-----------------|-------------|
|                  |             |                                                                                        |         | Sequence coverage(%)   | Unique peptides | MS/MS count | Sequence coverage(%)   | Unique peptides | MS/MS count |
| Q58DS9           | RAB5C       | Ras-related protein Rab-5C                                                             | 23.466  | 30.1                   | 2               | 3           | 26.9                   | 2               | 5           |
| F1MBF6           | RAB6A       | Uncharacterized protein                                                                | 23.518  | 51                     | 3               | 4           | 34.6                   | 2               | 3           |
| A6QR46           | RAB6B       | Ras-related protein Rab-6B                                                             | 23.461  | 61.5                   | 6               | 39          | 51.4                   | 4               | 41          |
| A4FV54           | RAB8A       | Ras-related protein Rab-8A                                                             | 23.684  | 36.7                   | 6               | 15          | 26.6                   | 3               | 14          |
| Q08DW1           | RAB9A       | RAB9A, member RAS oncogene family                                                      | 22.909  | 77.8                   | 12              | 30          | 23.2                   | 5               | 18          |
| Q0VCB4           | RAB9B       | RAB9B, member RAS oncogene family                                                      | 22.705  | 31.8                   | 3               | 4           | #N/A                   | #N/A            | #N/A        |
| Q1RMH4           | RABAC1      | Prenylated Rab acceptor protein 1                                                      | 20.626  | #N/A                   | #N/A            | #N/A        | 9.2                    | 2               | 3           |
| F1MQH8           | RABEP1      | Uncharacterized protein                                                                | 99.516  | #N/A                   | #N/A            | #N/A        | 1.2                    | 1               | 1           |
| A4FUG8           | RABEP2      | Rab GTPase-binding effector protein                                                    | 65.602  | 6.8                    | 4               | 4           | 2.7                    | 2               | 3           |
| F1N746           | RABGAP1     | Uncharacterized protein                                                                | 121     | 6.1                    | 6               | 7           | #N/A                   | #N/A            | #N/A        |
| A6QPS3           | RABGAP1L    | RABGAP1L protein                                                                       | 27.035  | 9                      | 1               | 1           | #N/A                   | #N/A            | #N/A        |
| Q2TBX8           | RABGEF1     | RABGEF1 protein                                                                        | 56.937  | 8.1                    | 4               | 4           | 7.3                    | 4               | 8           |
| Q5EA80           | RABGGTA     | Geranylgeranyl transferase type-2 subunit alpha                                        | 64.945  | 5.3                    | 3               | 3           | #N/A                   | #N/A            | #N/A        |
| Q5E9B3           | RABGGTB     | Geranylgeranyl transferase type-2 subunit beta                                         | 36.972  | #N/A                   | #N/A            | #N/A        | 3.3                    | 1               | 1           |
| P62998           | RAC1        | Ras-related C3 botulinum toxin                                                         | 21.45   | 34.9                   | 2               | 12          | 19.8                   | 3               | 16          |
| F1MCR0           | RAC3        | Uncharacterized protein (Fragment)                                                     | 20.177  | 22.8                   | 1               | 3           | #N/A                   | #N/A            | #N/A        |
| E1BJP2           | RACGAP1     | Uncharacterized protein                                                                | 71.087  | 17.2                   | 10              | 12          | 9.8                    | 7               | 11          |
| Q58DB5           | RAD18       | Postreplication repair protein                                                         | 37.715  | 2.7                    | 1               | 1           | #N/A                   | #N/A            | #N/A        |
| Q29RK4           | RAD23B      | UV excision repair protein RAD23                                                       | 43.117  | 26                     | 12              | 29          | 20.8                   | 11              | 30          |
| Q5E9A4           | RAE1        | mRNA export factor                                                                     | 40.967  | 22.8                   | 9               | 11          | 14.9                   | 5               | 12          |
| A7E3S4           | RAF1        | RAF proto-oncogene serine/threonine-protein kinase                                     | 72.874  | 1.7                    | 1               | 1           | #N/A                   | #N/A            | #N/A        |
| Q3ZCK2           | RALA        | Uncharacterized protein                                                                | 23.54   | 47.1                   | 2               | 3           | 27.7                   | 3               | 14          |
| A5D977           | RALB        | RALB protein                                                                           | 23.438  | 56.3                   | 7               | 45          | 31.1                   | 5               | 63          |
| F1MCG4           | RALGAPB     | Uncharacterized protein                                                                | 168.85  | 2.1                    | 3               | 3           | 1.1                    | 2               | 3           |
| Q5E952           | RALY        | RNA binding protein (Autoantigenic, hnRNP-associated with lethal yellow) short isoform | 30.142  | #N/A                   | #N/A            | #N/A        | 6.7                    | 2               | 2           |
| Q3T054           | RAN         | GTP-binding nuclear protein Ran                                                        | 24.423  | 45.8                   | 10              | 37          | 30.6                   | 7               | 46          |
| Q3TOM7           | RANBP1      | Ran-specific GTPase-activating                                                         | 23.712  | 18.4                   | 4               | 9           | #N/A                   | #N/A            | #N/A        |

| Accession number | Gene symbol | Discription                                             | MW(kDa) | Biological Replicate 1 |                 |             | Biological Replicate 2 |                 |             |
|------------------|-------------|---------------------------------------------------------|---------|------------------------|-----------------|-------------|------------------------|-----------------|-------------|
|                  |             |                                                         |         | Sequence coverage(%)   | Unique peptides | MS/MS count | Sequence coverage(%)   | Unique peptides | MS/MS count |
| F1MFD5           | RANGAP1     | Uncharacterized protein                                 | 62.941  | 12.8                   | 8               | 12          | 9.6                    | 6               | 9           |
| F1MW14           | RANGRF      | Ran guanine nucleotide release                          | 20.714  | 25.8                   | 3               | 4           | #N/A                   | #N/A            | #N/A        |
| P62833           | RAP1A       | Ras-related protein Rap-1A                              | 20.987  | #N/A                   | #N/A            | #N/A        | 30.4                   | 1               | 1           |
| P61223           | RAP1B       | Ras-related protein Rap-1b                              | 20.825  | 47.3                   | 9               | 25          | 37.5                   | 2               | 27          |
| F6RPT3           | RAP1GDS1    | Rap1 GTPase-GDP dissociation stimulator 1 (Fragment)    | 60.889  | 34.3                   | 16              | 25          | 14.5                   | 7               | 20          |
| A4IFU2           | RAP2B       | RAP2B protein                                           | 20.488  | 12.6                   | 1               | 1           | #N/A                   | #N/A            | #N/A        |
| Q08DI5           | RAP2C       | Ras-related protein Rap-2c                              | 20.745  | 10.9                   | 1               | 5           | 6                      | 1               | 3           |
| F1MJY2           | RAPGEF1     | Uncharacterized protein (Fragment)                      | 137.63  | 2.9                    | 3               | 3           | 1.7                    | 2               | 3           |
| E1BPM7           | RAPH1       | Uncharacterized protein                                 | 124.13  | 1.6                    | 2               | 2           | 1.6                    | 2               | 2           |
| Q0P5D6           | RARRES1     | Retinoic acid receptor responder (Tazarotene induced) 1 | 32.771  | 21.1                   | 6               | 38          | 5.9                    | 3               | 5           |
| A7YW98           | RARS        | Arginine--tRNA ligase, cytoplasmic                      | 75.56   | 59.2                   | 38              | 124         | 33.5                   | 24              | 78          |
| Q0P5H7           | RARS2       | Probable arginine--tRNA ligase, mitochondrial           | 65.63   | 7.6                    | 4               | 5           | 4.2                    | 3               | 3           |
| F1MC29           | RASSF1      | Uncharacterized protein                                 | 31.209  | 3                      | 1               | 5           | #N/A                   | #N/A            | #N/A        |
| Q3MHL3           | RBBP4       | Histone-binding protein RBBP4                           | 47.655  | 19.5                   | 2               | 4           | #N/A                   | #N/A            | #N/A        |
| Q3SWX8           | RBBP7       | Histone-binding protein RBBP7                           | 47.844  | 40                     | 8               | 28          | 20.2                   | 3               | 22          |
| F6RBQ9           | RBM3        | Uncharacterized protein                                 | 17.496  | 19.4                   | 2               | 4           | #N/A                   | #N/A            | #N/A        |
| Q3MHX3           | RBM4        | RNA-binding protein 4                                   | 40.077  | 25.7                   | 8               | 14          | 13.3                   | 5               | 14          |
| Q0P5L0           | RBM42       | RNA-binding protein 42                                  | 47.187  | 3.8                    | 1               | 1           | #N/A                   | #N/A            | #N/A        |
| P02694           | RBP1        | Retinol-binding protein 1                               | 15.823  | 76.3                   | 11              | 24          | 31.9                   | 5               | 9           |
| F1N2U8           | RBPMS2      | Uncharacterized protein (Fragment)                      | 22.414  | 37.9                   | 6               | 9           | 7.4                    | 2               | 5           |
| Q2HJI9           | RBX1        | Ring-box 1                                              | 12.274  | 13                     | 3               | 8           | 13                     | 2               | 7           |
| E1BKF7           | RCBTB1      | Uncharacterized protein                                 | 58.18   | 3                      | 1               | 1           | 2.1                    | 1               | 2           |
| A6QL85           | RCC2        | RCC2 protein                                            | 55.942  | 11.3                   | 5               | 6           | 4.2                    | 2               | 2           |
| A4IFE2           | RCHY1       | RCHY1 protein                                           | 30.168  | 5.4                    | 1               | 4           | #N/A                   | #N/A            | #N/A        |
| G3N2L2           | RCN1        | Uncharacterized protein (Fragment)                      | 29.312  | 17.9                   | 4               | 5           | 8.1                    | 2               | 4           |
| Q0VCQ9           | RCN2        | Reticulocalbin 2, EF-hand calcium binding domain        | 36.909  | 16.4                   | 4               | 6           | 5                      | 1               | 1           |
| E1BM93           | RDH11       | Uncharacterized protein                                 | 35.487  | 14.7                   | 4               | 6           | 6.3                    | 2               | 4           |
| Q17QC2           | RDH13       | Retinol dehydrogenase 13 (All-                          | 36.272  | #N/A                   | #N/A            | #N/A        | 3.9                    | 1               | 3           |

| Accession number | Gene symbol | Discription                                       | MW(kDa) | Biological Replicate 1 |                 |             | Biological Replicate 2 |                 |             |
|------------------|-------------|---------------------------------------------------|---------|------------------------|-----------------|-------------|------------------------|-----------------|-------------|
|                  |             |                                                   |         | Sequence coverage(%)   | Unique peptides | MS/MS count | Sequence coverage(%)   | Unique peptides | MS/MS count |
| Q17QW3           | RDH14       | Retinol dehydrogenase 14 (All-trans/9-cis/11-cis) | 36.625  | 12.2                   | 4               | 6           | 8.3                    | 3               | 5           |
| Q32LP2           | RDX         | Radixin                                           | 68.567  | 36                     | 6               | 6           | 22.1                   | 6               | 9           |
| Q2KI30           | REEP2       | Receptor expression-enhancing                     | 28.439  | 5.9                    | 2               | 2           | #N/A                   | #N/A            | #N/A        |
| Q3ZCI8           | REEP4       | Receptor expression-enhancing                     | 29.597  | 5.8                    | 2               | 3           | 9.7                    | 3               | 8           |
| F1MUS6           | RELN        | Reelin (Fragment)                                 | 368.91  | 1                      | 2               | 2           | 0.5                    | 2               | 3           |
| F6Q4T4           | REPS1       | Uncharacterized protein                           | 86.77   | 8.7                    | 7               | 8           | 2.5                    | 2               | 2           |
| A5PJ65           | RER1        | Protein RER1                                      | 22.863  | 28.1                   | 5               | 7           | 9.2                    | 2               | 8           |
| A2VE52           | REX02       | Oligoribonuclease, mitochondrial                  | 26.885  | 46.4                   | 10              | 32          | 27.8                   | 6               | 15          |
| F1N4T1           | RFC1        | Uncharacterized protein                           | 48.717  | 5.3                    | 2               | 3           | 3                      | 1               | 1           |
| Q05B83           | RFC2        | Replication factor C subunit 2                    | 38.729  | 9.9                    | 4               | 5           | #N/A                   | #N/A            | #N/A        |
| Q2TBV1           | RFC3        | Replication factor C subunit 3                    | 40.465  | 14.3                   | 4               | 4           | 5.3                    | 2               | 3           |
| Q29RS9           | RFC4        | Replication factor C (Activator 1) 4, 37kDa       | 37.097  | 13.6                   | 5               | 7           | 11.9                   | 4               | 6           |
| Q32PI3           | RFC5        | Replication factor C (Activator 1) 5, 36.5kDa     | 35.675  | 17.1                   | 5               | 7           | 5.4                    | 2               | 4           |
| E1BNC6           | RFT1        | Uncharacterized protein                           | 60.521  | 1.7                    | 1               | 2           | #N/A                   | #N/A            | #N/A        |
| E1BGG6           | RFX5        | Uncharacterized protein                           | 65.286  | 1.8                    | 1               | 1           | #N/A                   | #N/A            | #N/A        |
| G3N0I0           | RGAG4       | Uncharacterized protein                           | 65.571  | 1.2                    | 1               | 1           | #N/A                   | #N/A            | #N/A        |
| Q9TTJ5           | RGN         | Regucalcin                                        | 33.307  | 17.1                   | 5               | 8           | 8.7                    | 2               | 3           |
| Q2T9P3           | RGP1        | Retrograde Golgi transport protein RGP1 homolog   | 43.097  | 8.6                    | 4               | 5           | 6.3                    | 3               | 4           |
| O46471           | RGS16       | Regulator of G-protein signaling 16               | 22.635  | #N/A                   | #N/A            | #N/A        | 11.9                   | 2               | 2           |
| Q0P5H5           | RGS2        | Regulator of G-protein signaling 2                | 24.209  | 5.7                    | 1               | 1           | #N/A                   | #N/A            | #N/A        |
| P61585           | RHOA        | Transforming protein RhoA                         | 21.768  | 44                     | 9               | 30          | 21.8                   | 5               | 16          |
| Q1RMI2           | RHOG        | Ras homolog gene family, member G                 | 21.28   | 11                     | 1               | 1           | 11                     | 2               | 2           |
| Q2HJF8           | RHOT1       | Mitochondrial Rho GTPase 1                        | 72.077  | 21.4                   | 11              | 18          | 7.9                    | 3               | 7           |
| Q5E9M9           | RHOT2       | Mitochondrial Rho GTPase 2                        | 68.151  | 19.3                   | 8               | 11          | 12.1                   | 6               | 15          |
| Q08DT8           | RINT1       | RAD50 interactor 1                                | 90.879  | 3.8                    | 4               | 5           | #N/A                   | #N/A            | #N/A        |
| A5D7A4           | RIT1        | RIT1 protein                                      | 25.055  | 5.5                    | 1               | 1           | #N/A                   | #N/A            | #N/A        |
| Q32KL4           | RMDN1       | Regulator of microtubule dynamics protein 1       | 35.923  | 8.8                    | 1               | 1           | 6                      | 2               | 4           |

| Accession number | Gene symbol | Discription                                                 | MW(kDa) | Biological Replicate 1 |                 |             | Biological Replicate 2 |                 |             |
|------------------|-------------|-------------------------------------------------------------|---------|------------------------|-----------------|-------------|------------------------|-----------------|-------------|
|                  |             |                                                             |         | Sequence coverage(%)   | Unique peptides | MS/MS count | Sequence coverage(%)   | Unique peptides | MS/MS count |
| Q1JQC5           | RMDN3       | Regulator of microtubule dynamics protein 3                 | 51.905  | 44.2                   | 17              | 53          | 24.4                   | 11              | 41          |
| F1MS81           | RMND1       | Uncharacterized protein                                     | 51.811  | 12                     | 6               | 7           | 12                     | 5               | 12          |
| F1N2X2           | RNASEH1     | Uncharacterized protein                                     | 31.168  | 14.3                   | 3               | 3           | 3.6                    | 1               | 2           |
| Q0III8           | RNASET2     | RNASET2 protein (Fragment)                                  | 32.829  | 9.3                    | 2               | 2           | #N/A                   | #N/A            | #N/A        |
| Q4U5R4           | RNF114      | RING finger protein 114                                     | 25.669  | 51.7                   | 12              | 58          | 48.7                   | 11              | 44          |
| F1MM46           | RNF121      | Uncharacterized protein                                     | 34.554  | 3.1                    | 1               | 3           | 5.4                    | 2               | 5           |
| Q0VD51           | RNF13       | E3 ubiquitin-protein ligase RNF13                           | 42.688  | 7.9                    | 2               | 2           | #N/A                   | #N/A            | #N/A        |
| E1B7X3           | RNF146A     | E3 ubiquitin-protein ligase RNF146-                         | 37.542  | 3.5                    | 1               | 1           | #N/A                   | #N/A            | #N/A        |
| F1MK05           | RNF170      | E3 ubiquitin-protein ligase RNF170                          | 29.689  | 23.6                   | 5               | 10          | 8.9                    | 2               | 4           |
| A9Q1J6           | RNF18       | Ring finger protein 18                                      | 51.584  | 6                      | 3               | 3           | #N/A                   | #N/A            | #N/A        |
| A4IFC2           | RNF185      | RNF185 protein                                              | 20.428  | 7.3                    | 2               | 3           | #N/A                   | #N/A            | #N/A        |
| A2VDP1           | RNF20       | E3 ubiquitin-protein ligase BRE1A                           | 113.66  | 2.2                    | 2               | 2           | #N/A                   | #N/A            | #N/A        |
| F1MLH7           | RNF214      | Uncharacterized protein                                     | 77.691  | #N/A                   | #N/A            | #N/A        | 1.4                    | 1               | 1           |
| A6QP97           | RNF220      | E3 ubiquitin-protein ligase RNF220                          | 27.528  | 4.1                    | 1               | 1           | #N/A                   | #N/A            | #N/A        |
| Q5E9J6           | RNF34       | E3 ubiquitin-protein ligase RNF34                           | 41.787  | 10.9                   | 3               | 5           | #N/A                   | #N/A            | #N/A        |
| Q0P5F4           | RNF7        | Ring finger protein 7                                       | 12.679  | 18.6                   | 2               | 2           | #N/A                   | #N/A            | #N/A        |
| H9GW43           | RNH1        | Uncharacterized protein                                     | 25.835  | 71.4                   | 11              | 29          | 29.9                   | 5               | 7           |
| E1BBM0           | RNMTL1      | Uncharacterized protein                                     | 46.299  | 2.6                    | 1               | 1           | #N/A                   | #N/A            | #N/A        |
| G3X743           | RNPEP       | Uncharacterized protein (Fragment)                          | 56.56   | 2                      | 1               | 1           | #N/A                   | #N/A            | #N/A        |
| F1MF50           | ROCK1       | Rho-associated protein kinase 1                             | 159.76  | 2.9                    | 2               | 2           | #N/A                   | #N/A            | #N/A        |
| F1N319           | ROCK2       | Rho-associated protein kinase 2                             | 155.89  | 3.3                    | 2               | 5           | 0.6                    | 1               | 2           |
| Q0VCV0           | RPA1        | Replication protein A1, 70kDa                               | 68.213  | 44.2                   | 26              | 67          | 24.8                   | 15              | 40          |
| Q2KI86           | RPA2        | Replication protein A2, 32kDa                               | 29.163  | 39.3                   | 7               | 21          | 15.9                   | 4               | 12          |
| Q3SZ11           | RPA3        | Replication protein A3, 14kDa                               | 13.508  | 51.2                   | 4               | 9           | 21.5                   | 2               | 3           |
| A0JN53           | RPAP1       | RNA polymerase II-associated                                | 152.86  | 8.7                    | 12              | 20          | 1.2                    | 2               | 4           |
| F6RRD7           | RPAP2       | Putative RNA polymerase II subunit B1 CTD phosphatase RPAP2 | 68.697  | #N/A                   | #N/A            | #N/A        | 3.5                    | 2               | 2           |
| F1NOV7           | RPAP3       | Uncharacterized protein                                     | 75.594  | 13.2                   | 8               | 16          | 7.2                    | 5               | 7           |
| G5E6S3           | RPE         | Uncharacterized protein (Fragment)                          | 20.706  | #N/A                   | #N/A            | #N/A        | 4.8                    | 1               | 2           |
| G3X872           | RPH3AL      | Rab effector Noc2                                           | 31.915  | 14.4                   | 4               | 8           | 2.7                    | 1               | 2           |
| Q3T186           | RPIA        | Ribose-5-phosphate isomerase                                | 28.753  | 33                     | 8               | 16          | 6.8                    | 2               | 3           |

| Accession number | Gene symbol   | Discription                                 | MW(kDa) | Biological Replicate 1 |                 |             | Biological Replicate 2 |                 |             |
|------------------|---------------|---------------------------------------------|---------|------------------------|-----------------|-------------|------------------------|-----------------|-------------|
|                  |               |                                             |         | Sequence coverage(%)   | Unique peptides | MS/MS count | Sequence coverage(%)   | Unique peptides | MS/MS count |
| Q9XSI3           | RPL10         | 60S ribosomal protein L10                   | 24.603  | 36                     | 8               | 14          | 9.8                    | 2               | 5           |
| Q5E9E6           | RPL10A        | 60S ribosomal protein L10a                  | 24.831  | 52.5                   | 13              | 20          | 27.2                   | 6               | 15          |
| Q3T087           | RPL11         | 60S ribosomal protein L11                   | 20.252  | 25.3                   | 5               | 6           | 21.3                   | 4               | 11          |
| P61284           | RPL12         | 60S ribosomal protein L12                   | 17.818  | 67.3                   | 9               | 21          | 67.3                   | 10              | 31          |
| Q56JZ1           | RPL13         | 60S ribosomal protein L13                   | 24.291  | 30.3                   | 8               | 19          | 27                     | 6               | 14          |
| Q3SZ90           | RPL13A        | 60S ribosomal protein L13a                  | 23.523  | 31                     | 8               | 15          | 29.1                   | 7               | 22          |
| G8JKV5           | RPL14         | 60S ribosomal protein L14                   | 23.365  | 24.4                   | 5               | 9           | 21.6                   | 1               | 12          |
| Q5EAD6           | RPL15         | 60S ribosomal protein L15                   | 24.146  | 34.8                   | 7               | 11          | 11.3                   | 3               | 7           |
| Q3T025           | RPL17         | 60S ribosomal protein L17                   | 21.397  | 27.2                   | 6               | 10          | 10.3                   | 2               | 2           |
| Q5E973           | RPL18         | 60S ribosomal protein L18                   | 21.535  | 38.3                   | 6               | 11          | 23.9                   | 4               | 9           |
| Q3T003           | RPL18A        | 60S ribosomal protein L18a                  | 20.762  | 26.1                   | 5               | 11          | 22.2                   | 4               | 10          |
| Q3T0W9           | RPL19         | 60S ribosomal protein L19                   | 23.466  | 20.9                   | 4               | 7           | 8.2                    | 2               | 4           |
| Q861S4           | RPL21         | Similar to ribosomal protein L21 (Fragment) | 18.607  | 18.8                   | 3               | 4           | #N/A                   | #N/A            | #N/A        |
| F1N301           | RPL22         | Uncharacterized protein                     | 14.759  | 23.4                   | 3               | 7           | 25                     | 3               | 13          |
| Q3T057           | RPL23         | 60S ribosomal protein L23                   | 14.865  | 50                     | 7               | 11          | 12.9                   | 2               | 9           |
| Q24JY1           | RPL23A        | 60S ribosomal protein L23a                  | 17.695  | 26.9                   | 4               | 5           | 21.2                   | 4               | 6           |
| Q862I1           | RPL24         | 60S ribosomal protein L24                   | 17.779  | 23.6                   | 4               | 6           | 10.8                   | 2               | 3           |
| P61257           | RPL26         | 60S ribosomal protein L26                   | 17.258  | 21.4                   | 4               | 4           | 17.2                   | 3               | 7           |
| P61356           | RPL27         | 60S ribosomal protein L27                   | 15.798  | 40.4                   | 5               | 6           | 25                     | 4               | 7           |
| G1K1B4           | RPL27A        | 60S ribosomal protein L27a                  | 16.446  | 14.3                   | 2               | 4           | #N/A                   | #N/A            | #N/A        |
| Q3T0L7           | RPL28         | 60S ribosomal protein L28                   | 15.692  | 41.6                   | 8               | 14          | 43.8                   | 7               | 16          |
| P39872           | RPL3          | 60S ribosomal protein L3                    | 46.023  | 30                     | 14              | 21          | 19.6                   | 11              | 28          |
| Q3T0D5           | RPL30         | 60S ribosomal protein L30                   | 12.784  | 33.9                   | 5               | 6           | 45.2                   | 4               | 7           |
| Q56JX3           | RPL31         | 60S ribosomal protein L31                   | 14.463  | 24.8                   | 3               | 4           | 28                     | 4               | 11          |
| Q3SZQ6           | RPL32         | 60S ribosomal protein L32                   | 15.874  | 20                     | 3               | 3           | 15.6                   | 3               | 4           |
| F1ML72           | RPL34         | Uncharacterized protein (Fragment)          | 14.617  | 32.8                   | 5               | 10          | 13.3                   | 2               | 7           |
| Q3MHM7           | RPL35         | 60S ribosomal protein L35                   | 14.565  | 18.7                   | 2               | 2           | 14.6                   | 2               | 8           |
| Q56JY1           | RPL35A        | 60S ribosomal protein L35a                  | 12.552  | 45.5                   | 7               | 11          | 31.8                   | 4               | 11          |
| Q3T171           | RPL36         | 60S ribosomal protein L36                   | 12.224  | 9.5                    | 1               | 2           | 9.5                    | 1               | 1           |
| G8JL02           | RPL36AHNRNPH2 | Uncharacterized protein                     | 12.144  | #N/A                   | #N/A            | #N/A        | 9.6                    | 1               | 2           |
| Q3MIC0           | RPL37A        | 60S ribosomal protein L37a                  | 10.275  | 28.3                   | 2               | 2           | 18.5                   | 2               | 2           |



| Accession number | Gene symbol | Discription                                                            | MW(kDa) | Biological Replicate 1 |                 |             | Biological Replicate 2 |                 |             |
|------------------|-------------|------------------------------------------------------------------------|---------|------------------------|-----------------|-------------|------------------------|-----------------|-------------|
|                  |             |                                                                        |         | Sequence coverage(%)   | Unique peptides | MS/MS count | Sequence coverage(%)   | Unique peptides | MS/MS count |
| Q3T051           | RPL39       | 60S ribosomal protein L39                                              | 6.4066  | 19.6                   | 1               | 3           | #N/A                   | #N/A            | #N/A        |
| Q58DW0           | RPL4        | 60S ribosomal protein L4                                               | 47.411  | 42.4                   | 7               | 30          | 13.7                   | 6               | 11          |
| Q58DW5           | RPL5        | 60S ribosomal protein L5                                               | 34.344  | 21.9                   | 6               | 10          | 10.4                   | 3               | 5           |
| Q58DQ3           | RPL6        | 60S ribosomal protein L6                                               | 32.689  | 25.8                   | 7               | 15          | 27.9                   | 9               | 31          |
| Q58DT1           | RPL7        | 60S ribosomal protein L7                                               | 29.168  | 37.5                   | 11              | 19          | 19.4                   | 6               | 17          |
| Q2TBQ5           | RPL7A       | 60S ribosomal protein L7a                                              | 30.025  | 32.3                   | 10              | 17          | 22.6                   | 7               | 21          |
| Q3TOS6           | RPL8        | 60S ribosomal protein L8                                               | 28.024  | 30                     | 9               | 14          | 24.1                   | 8               | 15          |
| Q3SYR7           | RPL9        | 60S ribosomal protein L9                                               | 21.876  | 39.6                   | 7               | 10          | 16.1                   | 3               | 9           |
| Q95140           | RPLP0       | 60S acidic ribosomal protein P0                                        | 34.37   | 53.8                   | 14              | 37          | 38.7                   | 9               | 40          |
| Q56K14           | RPLP1       | 60S acidic ribosomal protein P1                                        | 11.514  | 14                     | 1               | 6           | #N/A                   | #N/A            | #N/A        |
| P42899           | RPLP2       | 60S acidic ribosomal protein P2                                        | 11.702  | 16.5                   | 1               | 1           | 31.3                   | 3               | 7           |
| A3KN04           | RPN1        | RPN1 protein                                                           | 68.351  | 56                     | 28              | 67          | 29.1                   | 18              | 71          |
| Q3SZI6           | RPN2        | Dolichyl-diphosphooligosaccharide--protein glycosyltransferase subunit | 69.213  | 33                     | 17              | 50          | 20.9                   | 11              | 38          |
| A6QLW3           | RPRD1B      | RPRD1B protein                                                         | 36.899  | 7.1                    | 2               | 2           | #N/A                   | #N/A            | #N/A        |
| Q3T0F4           | RPS10       | 40S ribosomal protein S10                                              | 18.898  | 60.6                   | 11              | 21          | 33.3                   | 8               | 16          |
| Q3T0V4           | RPS11       | 40S ribosomal protein S11                                              | 18.431  | 50.6                   | 8               | 12          | 27.8                   | 6               | 17          |
| Q76I81           | RPS12       | 40S ribosomal protein S12                                              | 14.515  | 40.2                   | 5               | 14          | 40.2                   | 6               | 16          |
| Q56JX8           | RPS13       | 40S ribosomal protein S13                                              | 17.222  | 59.6                   | 11              | 21          | 41.7                   | 8               | 16          |
| Q3T076           | RPS14       | Ribosomal protein S14                                                  | 16.776  | 28                     | 4               | 6           | 14.6                   | 3               | 5           |
| Q56K10           | RPS15       | 40S ribosomal protein S15                                              | 17.026  | 17.9                   | 2               | 4           | #N/A                   | #N/A            | #N/A        |
| Q76I82           | RPS15A      | 40S ribosomal protein S15a                                             | 14.839  | 48.5                   | 7               | 11          | 38.5                   | 6               | 11          |
| Q3T0X6           | RPS16       | 40S ribosomal protein S16                                              | 16.445  | 58.2                   | 11              | 21          | 50.7                   | 9               | 23          |
| A5PK63           | RPS17       | 40S ribosomal protein S17                                              | 15.582  | 48.9                   | 4               | 12          | 16.3                   | 3               | 6           |
| Q3TOR1           | RPS18       | 40S ribosomal protein S18                                              | 17.718  | 52.6                   | 11              | 19          | 25                     | 5               | 12          |
| Q32PD5           | RPS19       | 40S ribosomal protein S19                                              | 16.06   | 54.5                   | 11              | 26          | 47.6                   | 11              | 23          |
| O18789           | RPS2        | 40S ribosomal protein S2                                               | 31.235  | 51.2                   | 17              | 28          | 25.3                   | 9               | 25          |
| Q3ZBH8           | RPS20       | 40S ribosomal protein S20                                              | 13.373  | 32.8                   | 4               | 13          | 28.6                   | 4               | 10          |
| Q56JX5           | RPS25       | 40S ribosomal protein S25                                              | 13.742  | 24                     | 3               | 7           | 29.6                   | 5               | 12          |
| Q56JV1           | RPS26       | 40S ribosomal protein S26                                              | 13.015  | 20.9                   | 2               | 3           | 20.9                   | 2               | 3           |
| P62992           | RPS27A      | Ubiquitin-40S ribosomal protein                                        | 17.965  | 50                     | 1               | 89          | #N/A                   | #N/A            | #N/A        |
| Q3T0B7           | RPS27L      | 40S ribosomal protein S27-like                                         | 9.4631  | 22.6                   | 2               | 2           | 9.5                    | 1               | 2           |

| Accession number | Gene symbol | Discription                         | MW(kDa) | Biological Replicate 1 |                 |             | Biological Replicate 2 |                 |             |
|------------------|-------------|-------------------------------------|---------|------------------------|-----------------|-------------|------------------------|-----------------|-------------|
|                  |             |                                     |         | Sequence coverage(%)   | Unique peptides | MS/MS count | Sequence coverage(%)   | Unique peptides | MS/MS count |
| Q56JX6           | RPS28       | 40S ribosomal protein S28           | 7.8409  | 17.4                   | 1               | 2           | 15.9                   | 1               | 1           |
| P62276           | RPS29       | 40S ribosomal protein S29           | 6.6767  | 19.6                   | 1               | 2           | #N/A                   | #N/A            | #N/A        |
| Q3T169           | RPS3        | 40S ribosomal protein S3            | 26.688  | 67.5                   | 16              | 39          | 62.6                   | 17              | 53          |
| Q56JV9           | RPS3A       | 40S ribosomal protein S3a           | 29.945  | 39                     | 13              | 25          | 38.6                   | 10              | 19          |
| P79103           | RPS4        | 40S ribosomal protein S4            | 29.597  | 50.6                   | 13              | 32          | #N/A                   | #N/A            | #N/A        |
| Q5E988           | RPS5        | 40S ribosomal protein S5            | 22.876  | 31.9                   | 9               | 15          | 26.5                   | 8               | 21          |
| Q5E995           | RPS6        | 40S ribosomal protein S6            | 28.666  | 34.5                   | 8               | 15          | 13.7                   | 3               | 6           |
| A4IFF4           | RPS6KA1     | Ribosomal protein S6 kinase         | 82.724  | 31.8                   | 12              | 33          | 15.5                   | 5               | 23          |
| F1MZW8           | RPS6KA3     | Ribosomal protein S6 kinase         | 83.666  | 29.1                   | 12              | 19          | 10.7                   | 2               | 6           |
| F1MNP4           | RPS6KB1     | Ribosomal protein S6 kinase         | 59.109  | 16                     | 9               | 19          | 6.9                    | 3               | 8           |
| A6H769           | RPS7        | 40S ribosomal protein S7            | 22.127  | 22.7                   | 5               | 6           | 12.9                   | 3               | 7           |
| G8JKY0           | RPS8        | 40S ribosomal protein S8 (Fragment) | 24.074  | 51.2                   | 9               | 17          | 31.4                   | 6               | 17          |
| A6QLG5           | RPS9        | 40S ribosomal protein S9            | 22.591  | 46.9                   | 14              | 28          | 34.5                   | 9               | 25          |
| P26452           | RPSA        | 40S ribosomal protein SA            | 32.884  | 44.4                   | 10              | 30          | 20.3                   | 6               | 29          |
| F1MG06           | RPTOR       | Uncharacterized protein             | 149.48  | 0.7                    | 1               | 1           | #N/A                   | #N/A            | #N/A        |
| A7MB47           | RQCD1       | Cell differentiation protein RCD1   | 33.601  | 23.1                   | 6               | 9           | 3.7                    | 1               | 2           |
| Q3SX43           | RRAGA       | Ras-related GTP-binding protein A   | 36.566  | 25.9                   | 8               | 13          | 13.1                   | 4               | 7           |
| Q0VD29           | RRAGC       | Ras-related GTP binding C           | 44.292  | 28.8                   | 5               | 29          | 22.8                   | 2               | 17          |
| E1BK97           | RRAGD       | Uncharacterized protein             | 45.158  | 11.8                   | 1               | 1           | 18.6                   | 1               | 1           |
| A5PKL2           | RRAS2       | RRAS2 protein                       | 23.399  | 23                     | 4               | 6           | 22.1                   | 5               | 11          |
| F1MDC1           | RRBP1       | Uncharacterized protein             | 166.91  | 3.9                    | 3               | 4           | 5                      | 8               | 13          |
| F1MSF1           | RRM1        | Ribonucleoside-diphosphate          | 89.99   | 24.3                   | 18              | 38          | 10.6                   | 10              | 26          |
| E1BFQ8           | RRM2B       | Uncharacterized protein             | 40.859  | 11.4                   | 3               | 3           | #N/A                   | #N/A            | #N/A        |
| E1BNA1           | RRP12       | Uncharacterized protein             | 137.23  | #N/A                   | #N/A            | #N/A        | 0.9                    | 1               | 2           |
| Q5E9C0           | RSU1        | Ras suppressor protein 1            | 31.537  | 33.2                   | 7               | 16          | 6.1                    | 2               | 2           |
| Q2HJ88           | RTCA        | RNA 3-terminal phosphate cyclase    | 39.251  | 44                     | 13              | 35          | 17.8                   | 6               | 13          |
| Q5E9T9           | RTCB        | tRNA-splicing ligase RtcB homolog   | 55.199  | 40.2                   | 19              | 38          | 19.4                   | 10              | 16          |
| F1N405           | RTN4        | Reticulon                           | 130.41  | 7.2                    | 7               | 14          | 3.6                    | 4               | 8           |
| E1BNY5           | RUFY3       | Uncharacterized protein             | 55.581  | 3.4                    | 2               | 2           | 5.2                    | 2               | 3           |
| A7MBG8           | RUVBL1      | RUVBL1 protein                      | 50.153  | 38.4                   | 13              | 29          | 12.1                   | 5               | 17          |
| Q2TBU9           | RUVBL2      | RuvB-like 2                         | 51.169  | 43.8                   | 18              | 32          | 23.5                   | 11              | 35          |
| Q32L76           | SAA4        | Serum amyloid A-4 protein           | 14.687  | 8.5                    | 1               | 1           | 13.2                   | 2               | 3           |

| Accession number | Gene symbol | Discription                                               | MW(kDa) | Biological Replicate 1 |                 |             | Biological Replicate 2 |                 |             |
|------------------|-------------|-----------------------------------------------------------|---------|------------------------|-----------------|-------------|------------------------|-----------------|-------------|
|                  |             |                                                           |         | Sequence coverage(%)   | Unique peptides | MS/MS count | Sequence coverage(%)   | Unique peptides | MS/MS count |
| A6QL88           | SACM1L      | Phosphatidylinositide phosphatase                         | 67.092  | 36.8                   | 20              | 45          | 16                     | 10              | 33          |
| A2VE14           | SAE1        | SUMO-activating enzyme subunit 1                          | 38.305  | 44.2                   | 14              | 25          | 23.1                   | 9               | 18          |
| E1BDE7           | SAFB2       | Uncharacterized protein                                   | 108.52  | 1.4                    | 2               | 2           | #N/A                   | #N/A            | #N/A        |
| E1BJZ5           | SALL4       | Uncharacterized protein                                   | 110.79  | 3.5                    | 4               | 4           | 2                      | 2               | 3           |
| F1N763           | SAMD12      | Uncharacterized protein                                   | 18.204  | 14.3                   | 2               | 2           | #N/A                   | #N/A            | #N/A        |
| Q2HJ55           | SAMM50      | Sorting and assembly machinery component 50 homolog       | 52.042  | 52.7                   | 21              | 56          | 35                     | 15              | 38          |
| A7Z051           | SAPS3       | SAPS3 protein                                             | 97.612  | 2.5                    | 2               | 2           | #N/A                   | #N/A            | #N/A        |
| Q3TOD7           | SAR1A       | GTP-binding protein SAR1a                                 | 22.409  | 21.2                   | 5               | 15          | 20.7                   | 4               | 21          |
| Q08E24           | SARAF       | Store-operated calcium entry-associated regulatory factor | 36.314  | 2.4                    | 1               | 1           | #N/A                   | #N/A            | #N/A        |
| Q9GMB8           | SARS        | Serine--tRNA ligase, cytoplasmic                          | 58.604  | 32.9                   | 16              | 38          | 20                     | 10              | 20          |
| F1N019           | SART3       | Uncharacterized protein (Fragment)                        | 74.322  | 6.1                    | 4               | 7           | #N/A                   | #N/A            | #N/A        |
| Q3SWZ6           | SBDS        | Ribosome maturation protein SBDS                          | 28.718  | 33.6                   | 8               | 16          | 21.6                   | 6               | 10          |
| E1BMP8           | SBN01       | Uncharacterized protein                                   | 154.51  | 2.7                    | 2               | 2           | #N/A                   | #N/A            | #N/A        |
| A6H7G3           | SC4MOL      | SC4MOL protein                                            | 35.06   | 7.2                    | 2               | 2           | #N/A                   | #N/A            | #N/A        |
| F1MYK6           | SCAF8       | Uncharacterized protein (Fragment)                        | 140.15  | 1.1                    | 1               | 1           | #N/A                   | #N/A            | #N/A        |
| Q3TOD2           | SCAMP1      | Secretory carrier membrane protein                        | 39.986  | 5.4                    | 2               | 2           | 8.8                    | 2               | 3           |
| A6QR35           | SCAMP2      | SCAMP2 protein                                            | 36.703  | 15.9                   | 4               | 12          | 16.5                   | 5               | 15          |
| Q58DR5           | SCAMP3      | Secretory carrier-associated membrane protein 3           | 38.277  | 15.6                   | 5               | 13          | 17                     | 5               | 11          |
| Q58DF6           | SCAMP4      | Secretory carrier-associated membrane protein 4           | 25.595  | 24.8                   | 4               | 8           | 8.7                    | 2               | 7           |
| Q17QF8           | SCAMP5      | Secretory carrier-associated membrane protein 5           | 26.116  | 8.1                    | 2               | 3           | #N/A                   | #N/A            | #N/A        |
| A6QQP4           | SCARB2      | SCARB2 protein                                            | 53.984  | 24.1                   | 10              | 22          | 12.1                   | 6               | 15          |
| Q3T067           | SCCPDH      | Saccharopine dehydrogenase-like oxidoreductase            | 47.319  | 34.3                   | 10              | 25          | 13.3                   | 5               | 14          |
| G3N2Z2           | SCD         | Acyl-CoA desaturase (Fragment)                            | 29.863  | #N/A                   | #N/A            | #N/A        | 5.1                    | 1               | 1           |
| E1BG76           | SCFD1       | Uncharacterized protein                                   | 72.406  | 49                     | 26              | 85          | 14.8                   | 9               | 19          |
| A0JN38           | SCFD2       | Secl family domain containing 2                           | 75.07   | 7.7                    | 5               | 6           | 3.1                    | 2               | 4           |
| A1A4J8           | SC01        | Protein SC01 homolog, mitochondrial                       | 33.657  | #N/A                   | #N/A            | #N/A        | 5.2                    | 2               | 2           |

| Accession number | Gene symbol | Discription                                                                         | MW(kDa) | Biological Replicate 1 |                 |             | Biological Replicate 2 |                 |             |
|------------------|-------------|-------------------------------------------------------------------------------------|---------|------------------------|-----------------|-------------|------------------------|-----------------|-------------|
|                  |             |                                                                                     |         | Sequence coverage(%)   | Unique peptides | MS/MS count | Sequence coverage(%)   | Unique peptides | MS/MS count |
| A6H784           | SC02        | Protein SC02 homolog, mitochondrial                                                 | 29.789  | #N/A                   | #N/A            | #N/A        | 5.6                    | 1               | 2           |
| P07857           | SCP2        | Non-specific lipid-transfer protein                                                 | 58.577  | 14.5                   | 8               | 9           | 5.9                    | 3               | 5           |
| Q2NKZ9           | SCPEP1      | Serine carboxypeptidase 1                                                           | 50.84   | 2.9                    | 1               | 2           | #N/A                   | #N/A            | #N/A        |
| P83939           | SCRN1       | Secernin-1                                                                          | 46.201  | 10.1                   | 3               | 5           | #N/A                   | #N/A            | #N/A        |
| Q17QS0           | SCRN3       | Secernin-3                                                                          | 48.233  | #N/A                   | #N/A            | #N/A        | 2.6                    | 1               | 5           |
| Q3ZBX5           | SCYE1       | Small inducible cytokine subfamily E, member 1 (Endothelial monocyte-               | 35.412  | 32.3                   | 9               | 13          | 22.4                   | 7               | 16          |
| F1MVK2           | SCYL1       | N-terminal kinase-like protein                                                      | 89.234  | 26                     | 18              | 36          | 7.3                    | 6               | 13          |
| F1MID0           | SCYL2       | Uncharacterized protein                                                             | 103.16  | 1.3                    | 1               | 1           | 1.7                    | 2               | 2           |
| Q3SZA6           | SDCBP       | Syndecan binding protein (Syntenin)                                                 | 32.389  | 45.6                   | 9               | 27          | 22.8                   | 5               | 5           |
| Q3T083           | SDF2L1      | Stromal cell-derived factor 2-like protein 1                                        | 23.557  | 62.9                   | 8               | 18          | 3.6                    | 1               | 5           |
| G3MY67           | SDHA        | Succinate dehydrogenase [ubiquinone] flavoprotein subunit, mitochondrial (Fragment) | 74.28   | 48.6                   | 23              | 57          | 27.9                   | 18              | 54          |
| Q3T189           | SDHB        | Succinate dehydrogenase [ubiquinone] iron-sulfur subunit,                           | 31.518  | 27.9                   | 8               | 14          | 16.8                   | 6               | 12          |
| P35720           | SDHC        | Succinate dehydrogenase cytochrome b560 subunit, mitochondrial                      | 18.389  | 12.4                   | 2               | 3           | #N/A                   | #N/A            | #N/A        |
| Q95123           | SDHD        | Succinate dehydrogenase [ubiquinone] cytochrome b small                             | 17.124  | 4.4                    | 1               | 1           | #N/A                   | #N/A            | #N/A        |
| Q17QH8           | SDR39U1     | Epimerase family protein SDR39U1                                                    | 31.334  | #N/A                   | #N/A            | #N/A        | 3.1                    | 1               | 1           |
| P67810           | SEC11A      | Signal peptidase complex catalytic subunit SEC11A                                   | 20.625  | 15.1                   | 3               | 4           | 9.5                    | 2               | 6           |
| Q2KI36           | SEC11C      | SEC11 homolog C ( <i>S. cerevisiae</i> )                                            | 21.63   | 27.1                   | 6               | 13          | 8.3                    | 2               | 6           |
| Q3ZCC9           | SEC13       | Protein SEC13 homolog                                                               | 35.471  | 26.1                   | 8               | 15          | 20.5                   | 5               | 9           |
| P58875           | SEC14L2     | SEC14-like protein 2                                                                | 46.2    | 6.5                    | 2               | 2           | #N/A                   | #N/A            | #N/A        |
| F1N6K7           | SEC16A      | Uncharacterized protein                                                             | 246.28  | 0.9                    | 3               | 4           | 1.5                    | 4               | 5           |
| F1N2T5           | SEC22A      | Uncharacterized protein                                                             | 35.053  | 6.2                    | 1               | 1           | #N/A                   | #N/A            | #N/A        |
| F1MLE8           | SEC22B      | Uncharacterized protein                                                             | 28.709  | 47.4                   | 12              | 49          | 29.1                   | 9               | 21          |
| F1MVW5           | SEC23A      | Protein transport protein Sec23A                                                    | 86.545  | 35.1                   | 15              | 45          | 10.7                   | 7               | 16          |
| Q3SZN2           | SEC23B      | Protein transport protein Sec23B                                                    | 86.461  | 19.2                   | 6               | 13          | #N/A                   | #N/A            | #N/A        |

| Accession number | Gene symbol | Discription                                             | MW(kDa) | Biological Replicate 1 |                 |             | Biological Replicate 2 |                 |             |
|------------------|-------------|---------------------------------------------------------|---------|------------------------|-----------------|-------------|------------------------|-----------------|-------------|
|                  |             |                                                         |         | Sequence coverage(%)   | Unique peptides | MS/MS count | Sequence coverage(%)   | Unique peptides | MS/MS count |
| E1BKW5           | SEC23IP     | Uncharacterized protein                                 | 111.63  | 6.2                    | 6               | 8           | 2.4                    | 3               | 7           |
| A6QNT8           | SEC24A      | Protein transport protein Sec24A                        | 120.1   | 4.5                    | 4               | 5           | #N/A                   | #N/A            | #N/A        |
| E1BPR4           | SEC24B      | Uncharacterized protein                                 | 135.4   | 1.7                    | 2               | 3           | 1.6                    | 2               | 3           |
| E1BIU0           | SEC24C      | Uncharacterized protein                                 | 117.99  | 18.4                   | 16              | 27          | 7.5                    | 8               | 11          |
| F1MV07           | SEC24D      | Uncharacterized protein                                 | 112.46  | 9.6                    | 8               | 10          | 0.9                    | 1               | 2           |
| E1BMP2           | SEC31A      | Uncharacterized protein                                 | 126.34  | 17.2                   | 20              | 34          | 7.5                    | 9               | 15          |
| E1BLS3           | SEC31B      | Uncharacterized protein                                 | 128.72  | 21.8                   | 24              | 45          | 7.7                    | 9               | 16          |
| Q5EA68           | SEC61A1     | Protein transport protein Sec61 subunit alpha isoform 1 | 52.224  | 9.5                    | 2               | 3           | 11.6                   | 2               | 16          |
| Q2KHX4           | SEC61A2     | Protein transport protein Sec61 subunit alpha isoform 2 | 52.247  | 11.3                   | 3               | 12          | 11.6                   | 2               | 5           |
| Q2NKT5           | SEC61B      | Sec61 beta subunit                                      | 9.9443  | 10.4                   | 1               | 1           | #N/A                   | #N/A            | #N/A        |
| F1MUP3           | SEC62       | Uncharacterized protein                                 | 45.708  | 9                      | 4               | 5           | 9                      | 5               | 8           |
| E1B7B1           | SEC63       | Uncharacterized protein                                 | 87.882  | 7.9                    | 5               | 10          | 3.3                    | 2               | 2           |
| A7YY75           | SEH1L       | Nucleoporin SEH1                                        | 39.64   | 23.6                   | 6               | 7           | 8.6                    | 3               | 5           |
| F1MGJ5           | SEL1L       | Uncharacterized protein (Fragment)                      | 94.29   | 13.8                   | 8               | 18          | 6.5                    | 4               | 9           |
| Q2KJ32           | SELENBP1    | Selenium-binding protein 1                              | 52.555  | 33.5                   | 12              | 23          | 4.4                    | 2               | 3           |
| E1BKK7           | SENP8       | Uncharacterized protein (Fragment)                      | 25.045  | 28.2                   | 4               | 10          | 6.4                    | 2               | 11          |
| Q0VC82           | SEPHS1      | Selenide, water dikinase 1                              | 42.88   | 2.6                    | 1               | 1           | #N/A                   | #N/A            | #N/A        |
| E1BHE5           | SEPHS2      | Uncharacterized protein                                 | 43.006  | 4.4                    | 1               | 3           | #N/A                   | #N/A            | #N/A        |
| A5PJU9           | SEPT1       | Septin-1                                                | 41.982  | 18.5                   | 6               | 14          | 5.4                    | 2               | 4           |
| A2VE99           | SEPT11      | Septin-11                                               | 48.991  | 24                     | 8               | 15          | 17.2                   | 6               | 9           |
| A8YXY3           | SEPT15      | 15 kDa selenoprotein                                    | 17.974  | 23.5                   | 3               | 11          | 9.9                    | 2               | 2           |
| Q2NKY7           | SEPT2       | Septin-2                                                | 41.571  | 25.2                   | 6               | 8           | 5.8                    | 2               | 2           |
| Q08DM7           | SEPT3       | Neuronal-specific septin-3                              | 40.537  | 15.4                   | 4               | 4           | 2.5                    | 1               | 1           |
| F1MBT8           | SEPT7       | Septin-7                                                | 48.901  | 25.5                   | 8               | 18          | 9.3                    | 4               | 7           |
| A1L5B7           | SERBP1      | SERPINE1 mRNA binding protein 1                         | 42.329  | 8.8                    | 2               | 3           | 10.4                   | 3               | 4           |
| F1MBF9           | SERINC1     | Serine incorporator 1                                   | 49.61   | 3.8                    | 1               | 2           | #N/A                   | #N/A            | #N/A        |
| F1N5T9           | SERINC5     | Uncharacterized protein (Fragment)                      | 51.697  | 6.5                    | 3               | 5           | 3.9                    | 2               | 5           |
| A6QPQ2           | SERPINA38   | Serpin A3-8                                             | 46.963  | 7.9                    | 1               | 2           | #N/A                   | #N/A            | #N/A        |
| O02739           | SERPINB6    | Serpin B6                                               | 42.56   | 34.4                   | 6               | 28          | 8.5                    | 2               | 12          |
| P13909           | SERPINE1    | Plasminogen activator inhibitor 1                       | 45.371  | 19.2                   | 5               | 13          | #N/A                   | #N/A            | #N/A        |

| Accession number | Gene symbol | Discription                                              | MW(kDa) | Biological Replicate 1 |                 |             | Biological Replicate 2 |                 |             |
|------------------|-------------|----------------------------------------------------------|---------|------------------------|-----------------|-------------|------------------------|-----------------|-------------|
|                  |             |                                                          |         | Sequence coverage(%)   | Unique peptides | MS/MS count | Sequence coverage(%)   | Unique peptides | MS/MS count |
| F1MZX2           | SERPINE2    | Uncharacterized protein                                  | 44.3    | 21.4                   | 9               | 24          | 14.9                   | 7               | 16          |
| Q2KJH6           | SERPINH1    | Serpin H1                                                | 46.506  | #N/A                   | #N/A            | #N/A        | 1.9                    | 1               | 1           |
| F1MCF1           | SET         | Uncharacterized protein (Fragment)                       | 29.718  | 29.1                   | 6               | 13          | 3.9                    | 1               | 2           |
| E1BAS6           | SETX        | Uncharacterized protein                                  | 301.19  | 0.3                    | 1               | 2           | #N/A                   | #N/A            | #N/A        |
| A2VDM7           | SF1         | Splicing factor 1                                        | 68.329  | 1.6                    | 1               | 1           | #N/A                   | #N/A            | #N/A        |
| G3MW14           | SF3A2       | Splicing factor 3A subunit 2                             | 43.974  | #N/A                   | #N/A            | #N/A        | 5.8                    | 2               | 2           |
| Q3SWY7           | SF3A3       | Splicing factor 3a, subunit 3                            | 58.905  | 5.4                    | 2               | 2           | #N/A                   | #N/A            | #N/A        |
| F1MX61           | SF3B1       | Uncharacterized protein                                  | 145.86  | 1.2                    | 2               | 2           | 1.6                    | 2               | 2           |
| Q2KIQ7           | SF3B14      | Splicing factor 3B, 14 kDa subunit                       | 14.585  | 9.6                    | 1               | 1           | #N/A                   | #N/A            | #N/A        |
| F1MC31           | SF3B2       | Uncharacterized protein                                  | 100.31  | 4.4                    | 3               | 5           | #N/A                   | #N/A            | #N/A        |
| A0JN52           | SF3B3       | Splicing factor 3B subunit 3                             | 135.58  | 5.4                    | 6               | 11          | 1.9                    | 3               | 3           |
| Q0VC36           | SFN         | 14-3-3 protein sigma                                     | 27.849  | 19.8                   | 2               | 7           | 14.9                   | 2               | 7           |
| E1BQ37           | SFPQ        | Uncharacterized protein                                  | 76.248  | 10.6                   | 6               | 12          | 7.8                    | 4               | 7           |
| A4FUC6           | SFRS9       | SFRS9 protein                                            | 25.478  | 9                      | 2               | 2           | #N/A                   | #N/A            | #N/A        |
| F1NOV9           | SFT2D3      | Uncharacterized protein (Fragment)                       | 22.494  | #N/A                   | #N/A            | #N/A        | 4.1                    | 1               | 2           |
| Q5E9M8           | SFXN1       | Sideroflexin-1                                           | 35.689  | 32.6                   | 9               | 17          | 19.3                   | 5               | 13          |
| Q5EA43           | SFXN2       | Sideroflexin-2                                           | 36.301  | 6.5                    | 2               | 4           | 6.2                    | 2               | 2           |
| A6QP55           | SFXN3       | Sideroflexin-3                                           | 35.707  | 8.7                    | 2               | 3           | 11.8                   | 3               | 4           |
| Q3TOM2           | SFXN4       | Sideroflexin-4                                           | 35.426  | 21.7                   | 7               | 20          | 11.2                   | 3               | 5           |
| E1BNX6           | SGMS2       | Uncharacterized protein                                  | 42.44   | 2.7                    | 1               | 1           | 2.7                    | 1               | 2           |
| A5D788           | SGPL1       | SGPL1 protein                                            | 63.566  | 12.7                   | 7               | 7           | 5.8                    | 4               | 9           |
| A6QPY4           | SGSH        | SGSH protein                                             | 35.044  | 9.2                    | 4               | 4           | 3.9                    | 1               | 3           |
| Q2KI13           | SGSM3       | Small G protein signaling modulator                      | 85.009  | 7.8                    | 5               | 5           | #N/A                   | #N/A            | #N/A        |
| Q32LM2           | SGTA        | Small glutamine-rich tetratricopeptide repeat-containing | 34.213  | 38.7                   | 12              | 21          | 20.4                   | 6               | 15          |
| A4IFC4           | SH3BGRL2    | SH3 domain-binding glutamic acid-rich-like protein 2     | 12.292  | 62.6                   | 5               | 8           | #N/A                   | #N/A            | #N/A        |
| Q3ZCL8           | SH3BGRL3    | SH3 domain-binding glutamic acid-rich-like protein 3     | 10.438  | 38.7                   | 3               | 5           | #N/A                   | #N/A            | #N/A        |
| Q2KJA1           | SH3GL1      | Endophilin-A2                                            | 41.454  | 23.1                   | 6               | 10          | 12                     | 3               | 9           |
| Q08DX1           | SH3GL2      | SH3-domain GRB2-like 2                                   | 39.886  | 25                     | 4               | 5           | 9.1                    | 1               | 1           |
| Q08DK5           | SH3GLB2     | Endophilin-B2                                            | 44.05   | 29.4                   | 9               | 12          | 18.5                   | 6               | 10          |



| Accession number | Gene symbol | Discription                                                                                      | MW(kDa) | Biological Replicate 1 |                 |             | Biological Replicate 2 |                 |             |
|------------------|-------------|--------------------------------------------------------------------------------------------------|---------|------------------------|-----------------|-------------|------------------------|-----------------|-------------|
|                  |             |                                                                                                  |         | Sequence coverage(%)   | Unique peptides | MS/MS count | Sequence coverage(%)   | Unique peptides | MS/MS count |
| F1MXY8           | SLC25A1     | Tricarboxylate transport protein, mitochondrial (Fragment)                                       | 34.017  | 41.3                   | 12              | 40          | 30                     | 10              | 38          |
| P22292           | SLC25A11    | Mitochondrial 2-oxoglutarate/malate carrier protein                                              | 34.171  | 42.7                   | 12              | 32          | 26.4                   | 8               | 33          |
| A6QNM9           | SLC25A12    | SLC25A12 protein                                                                                 | 74.529  | 45.9                   | 19              | 39          | 27.4                   | 13              | 32          |
| F1MX88           | SLC25A13    | Uncharacterized protein                                                                          | 75.041  | 43.2                   | 20              | 61          | 29.3                   | 15              | 67          |
| Q2KHW4           | SLC25A15    | Solute carrier family 25 (Mitochondrial carrier; ornithine                                       | 32.746  | 70.4                   | 16              | 130         | 24.3                   | 8               | 59          |
| Q2KJJ1           | SLC25A17    | Solute carrier family 25 (Mitochondrial carrier; peroxisomal membrane protein, 34kDa), member 17 | 34.553  | 10.4                   | 3               | 6           | #N/A                   | #N/A            | #N/A        |
| Q29RM1           | SLC25A19    | Mitochondrial thiamine pyrophosphate carrier                                                     | 35.111  | #N/A                   | #N/A            | #N/A        | 14.2                   | 5               | 6           |
| Q3SZA4           | SLC25A20    | Solute carrier family 25 (Carnitine/acylcarnitine translocase), member 20                        | 32.927  | 54.5                   | 14              | 39          | 25.2                   | 9               | 37          |
| Q08DK4           | SLC25A22    | Mitochondrial glutamate carrier 1                                                                | 34.531  | 54                     | 12              | 34          | 38.2                   | 10              | 51          |
| A5PJZ1           | SLC25A24    | Calcium-binding mitochondrial carrier protein SCaMC-1                                            | 53.284  | 63.7                   | 30              | 112         | 38.2                   | 23              | 105         |
| Q0V7M4           | SLC25A25    | Calcium-binding mitochondrial carrier protein SCaMC-2                                            | 52.769  | #N/A                   | #N/A            | #N/A        | 4.5                    | 2               | 2           |
| E1BME0           | SLC25A27    | Uncharacterized protein                                                                          | 35.782  | 6.2                    | 2               | 2           | 4.6                    | 2               | 4           |
| F1N2U7           | SLC25A30    | Uncharacterized protein                                                                          | 32.425  | 6.5                    | 2               | 3           | 7.9                    | 3               | 7           |
| Q2YDD9           | SLC25A31    | ADP/ATP translocase 4                                                                            | 35.694  | 19.8                   | 4               | 4           | 15.8                   | 4               | 6           |
| G3X7X2           | SLC25A32    | Uncharacterized protein                                                                          | 35.618  | #N/A                   | #N/A            | #N/A        | 2.5                    | 1               | 1           |
| Q58DS3           | SLC25A35    | Solute carrier family 25 member 35                                                               | 27.109  | 4.4                    | 1               | 1           | #N/A                   | #N/A            | #N/A        |
| F1MU04           | SLC25A36    | Uncharacterized protein                                                                          | 34.251  | 6.8                    | 2               | 4           | 6.8                    | 2               | 3           |
| P02722           | SLC25A4     | ADP/ATP translocase 1                                                                            | 32.967  | 51.7                   | 5               | 13          | 40.9                   | 5               | 18          |
| G5E5Z7           | SLC25A40    | Uncharacterized protein (Fragment)                                                               | 28.281  | 7.2                    | 2               | 3           | #N/A                   | #N/A            | #N/A        |
| E1B8B9           | SLC25A42    | Uncharacterized protein                                                                          | 35.423  | 2.8                    | 1               | 1           | #N/A                   | #N/A            | #N/A        |
| G3N0T6           | SLC25A43    | Uncharacterized protein                                                                          | 37.602  | 2.3                    | 1               | 2           | 2.3                    | 1               | 3           |
| Q8SQH5           | SLC25A5     | ADP/ATP translocase 2                                                                            | 32.955  | 52.3                   | 2               | 44          | 40.9                   | 2               | 31          |



| Accession number | Gene symbol | Discription                                                  | MW(kDa) | Biological Replicate 1 |                 |             | Biological Replicate 2 |                 |             |
|------------------|-------------|--------------------------------------------------------------|---------|------------------------|-----------------|-------------|------------------------|-----------------|-------------|
|                  |             |                                                              |         | Sequence coverage(%)   | Unique peptides | MS/MS count | Sequence coverage(%)   | Unique peptides | MS/MS count |
| F1MBR0           | SLC25A53    | Uncharacterized protein                                      | 34.621  | #N/A                   | #N/A            | #N/A        | 2.9                    | 1               | 1           |
| P32007           | SLC25A6     | ADP/ATP translocase 3                                        | 32.877  | 60.4                   | 6               | 138         | 40.9                   | 5               | 101         |
| Q58DD2           | SLC26A11    | Sodium-independent sulfate anion transporter                 | 65.349  | 2.5                    | 1               | 2           | #N/A                   | #N/A            | #N/A        |
| E1BFJ3           | SLC26A6     | Uncharacterized protein                                      | 83.345  | #N/A                   | #N/A            | #N/A        | 2.2                    | 2               | 2           |
| Q0VCQ2           | SLC27A4     | Solute carrier family 27 (Fatty acid transporter), member 4  | 72.198  | 6.8                    | 4               | 4           | 3.3                    | 2               | 3           |
| Q3ZC83           | SLC29A1     | Solute carrier family 29 (Nucleoside transporters), member 1 | 49.881  | 6.4                    | 2               | 4           | 2.2                    | 1               | 1           |
| P58352           | SLC2A3      | Solute carrier family 2, facilitated glucose transporter     | 54.019  | 3                      | 2               | 3           | #N/A                   | #N/A            | #N/A        |
| P58354           | SLC2A8      | Solute carrier family 2, facilitated glucose transporter     | 51.416  | 4                      | 2               | 2           | #N/A                   | #N/A            | #N/A        |
| F1MDV2           | SLC30A9     | Uncharacterized protein                                      | 63.164  | 6.7                    | 3               | 3           | 1.9                    | 1               | 1           |
| Q58DA6           | SLC35A2     | UDP-galactose translocator                                   | 41.18   | 2.3                    | 1               | 1           | #N/A                   | #N/A            | #N/A        |
| Q3ZBB0           | SLC35B2     | Solute carrier family 35, member B2                          | 47.69   | 6.9                    | 3               | 4           | 4.4                    | 2               | 4           |
| E1BEH8           | SLC35B4     | Uncharacterized protein                                      | 37.358  | 3                      | 1               | 1           | #N/A                   | #N/A            | #N/A        |
| F1ML50           | SLC35E1     | Uncharacterized protein                                      | 44.604  | 2.2                    | 1               | 1           | #N/A                   | #N/A            | #N/A        |
| E1B9A0           | SLC36A1     | Uncharacterized protein                                      | 52.953  | 3.2                    | 1               | 2           | #N/A                   | #N/A            | #N/A        |
| A7E3U5           | SLC38A7     | Putative sodium-coupled neutral amino acid transporter 7     | 49.852  | 1.9                    | 1               | 2           | 3                      | 1               | 1           |
| A5D7L5           | SLC39A14    | Zinc transporter ZIP14                                       | 53.933  | 2.4                    | 1               | 2           | 2.4                    | 1               | 1           |
| Q0VCM6           | SLC43A2     | Large neutral amino acids transporter small subunit 4        | 62.655  | #N/A                   | #N/A            | #N/A        | 1.8                    | 1               | 1           |
| E1BIP2           | SLC44A1     | Uncharacterized protein                                      | 73.87   | 2                      | 1               | 2           | #N/A                   | #N/A            | #N/A        |
| A5D7H3           | SLC44A2     | Choline transporter-like protein 2                           | 80.026  | 4.4                    | 3               | 5           | 2.1                    | 2               | 4           |
| F1MR50           | SLC4A1AP    | Uncharacterized protein (Fragment)                           | 83.194  | 9.4                    | 6               | 6           | 7.8                    | 6               | 8           |
| F1MDA3           | SLC7A6      | Uncharacterized protein                                      | 56.848  | 4.3                    | 2               | 5           | #N/A                   | #N/A            | #N/A        |
| F1MSI3           | SLC8B1      | Uncharacterized protein                                      | 63.993  | 3.6                    | 2               | 6           | #N/A                   | #N/A            | #N/A        |
| Q3SZK8           | SLC9A3R1    | Na(+)/H(+) exchange regulatory cofactor NHE-RF1              | 39.603  | 16                     | 6               | 11          | 11.4                   | 4               | 9           |
| A7MB44           | SLC9A6      | Sodium/hydrogen exchanger                                    | 77.87   | 2.6                    | 2               | 2           | #N/A                   | #N/A            | #N/A        |



| Accession number | Gene symbol | Discription                                      | MW(kDa) | Biological Replicate 1 |                 |             | Biological Replicate 2 |                 |             |
|------------------|-------------|--------------------------------------------------|---------|------------------------|-----------------|-------------|------------------------|-----------------|-------------|
|                  |             |                                                  |         | Sequence coverage(%)   | Unique peptides | MS/MS count | Sequence coverage(%)   | Unique peptides | MS/MS count |
| G3X6Z3           | SNRPD2      | Small nuclear ribonucleoprotein Sm D2 (Fragment) | 13.396  | 8.5                    | 1               | 1           | 8.5                    | 1               | 2           |
| F1MZ00           | SNRPD3      | Small nuclear ribonucleoprotein D3 polypeptide   | 13.916  | 7.1                    | 1               | 2           | 7.9                    | 1               | 1           |
| F1ME11           | SNRPE       | Small nuclear ribonucleoprotein E (Fragment)     | 10.708  | 12.1                   | 1               | 2           | #N/A                   | #N/A            | #N/A        |
| A7YWQ4           | SNTB2       | SNTB2 protein                                    | 57.956  | 1.7                    | 1               | 1           | #N/A                   | #N/A            | #N/A        |
| F1MYH6           | SNX1        | Sorting nexin-1                                  | 54.637  | 31.6                   | 13              | 24          | 11.6                   | 4               | 11          |
| Q08DD7           | SNX11       | Sorting nexin-11                                 | 30.205  | 15.9                   | 4               | 5           | 3                      | 1               | 2           |
| A6QR61           | SNX12       | SNX12 protein                                    | 18.884  | 67.3                   | 8               | 29          | 27.2                   | 4               | 14          |
| Q5EA77           | SNX17       | Sorting nexin-17                                 | 52.825  | 3                      | 2               | 2           | #N/A                   | #N/A            | #N/A        |
| Q17QS1           | SNX24       | Sorting nexin-24                                 | 19.908  | 6.5                    | 1               | 3           | #N/A                   | #N/A            | #N/A        |
| A5PKA5           | SNX27       | Sorting nexin-27                                 | 61.126  | 8.1                    | 5               | 6           | 2.8                    | 2               | 4           |
| Q1RMH8           | SNX3        | Sorting nexin-3                                  | 18.762  | 43.8                   | 7               | 7           | 26.5                   | 3               | 6           |
| E1BMD8           | SNX30       | Uncharacterized protein (Fragment)               | 44.974  | 19.3                   | 9               | 9           | 3.6                    | 2               | 5           |
| A1A4L0           | SNX4        | Sorting nexin-4                                  | 52.194  | 25.3                   | 11              | 18          | 13.8                   | 7               | 16          |
| Q3ZBM5           | SNX5        | Sorting nexin-5                                  | 46.819  | 23                     | 8               | 11          | 13.9                   | 5               | 8           |
| F1MHJ5           | SNX6        | Uncharacterized protein (Fragment)               | 44.639  | 17                     | 7               | 8           | 2.1                    | 1               | 2           |
| Q2KHV6           | SNX8        | Sorting nexin-8                                  | 51.619  | 17.6                   | 6               | 9           | 2.8                    | 1               | 1           |
| F1N6W6           | SNX9        | Sorting nexin (Fragment)                         | 66.114  | 15                     | 8               | 17          | 3.4                    | 2               | 3           |
| Q3TON9           | SOAT1       | O-acyltransferase                                | 64.831  | 8.5                    | 5               | 6           | 1.6                    | 1               | 1           |
| P00442           | SOD1        | Superoxide dismutase [Cu-Zn]                     | 15.682  | 32.2                   | 4               | 9           | 23                     | 3               | 14          |
| P41976           | SOD2        | Superoxide dismutase [Mn],                       | 24.638  | 26.1                   | 5               | 55          | 19.8                   | 4               | 41          |
| Q0VCF1           | SORBS1      | Sorbin and SH3 domain containing 1               | 46.461  | 5.8                    | 2               | 2           | 2.1                    | 1               | 4           |
| Q58D31           | SORD        | Sorbitol dehydrogenase                           | 38.099  | 14.6                   | 4               | 5           | 5.1                    | 2               | 5           |
| E1BKZ9           | SORT1       | Uncharacterized protein                          | 91.816  | 1.1                    | 1               | 1           | #N/A                   | #N/A            | #N/A        |
| E1BL97           | SOX13       | Uncharacterized protein                          | 69.008  | 5.8                    | 3               | 5           | 5.3                    | 3               | 8           |
| A4FUB3           | SOX5        | SOX5 protein                                     | 80.126  | 1.5                    | 1               | 1           | 1.5                    | 1               | 2           |
| F1MZ69           | SPAG9       | Uncharacterized protein                          | 128.57  | 2.5                    | 2               | 3           | 0.9                    | 1               | 1           |
| A2VDN5           | SPAST       | Spastin                                          | 67.224  | 13.5                   | 7               | 10          | 5.5                    | 4               | 5           |
| E1BLR1           | SPATA2      | Uncharacterized protein                          | 57.382  | 3.7                    | 1               | 1           | #N/A                   | #N/A            | #N/A        |
| F1MFP1           | SPATA5      | Uncharacterized protein (Fragment)               | 83.328  | 3.9                    | 2               | 2           | #N/A                   | #N/A            | #N/A        |

| Accession number | Gene symbol | Discription                                         | MW(kDa) | Biological Replicate 1 |                 |             | Biological Replicate 2 |                 |             |
|------------------|-------------|-----------------------------------------------------|---------|------------------------|-----------------|-------------|------------------------|-----------------|-------------|
|                  |             |                                                     |         | Sequence coverage(%)   | Unique peptides | MS/MS count | Sequence coverage(%)   | Unique peptides | MS/MS count |
| A7YSY2           | SPATA5L1    | Spermatogenesis-associated protein 5-like protein 1 | 82.553  | 2.1                    | 1               | 1           | #N/A                   | #N/A            | #N/A        |
| F1MK70           | SPATS2      | Uncharacterized protein                             | 59.285  | #N/A                   | #N/A            | #N/A        | 4.9                    | 2               | 2           |
| Q24JY3           | SPC24       | Kinetochore protein Spc24                           | 22.755  | 12.7                   | 2               | 3           | 14.7                   | 3               | 5           |
| Q3ZBK3           | SPC25       | Kinetochore protein Spc25                           | 26.607  | 11.1                   | 3               | 4           | 13.3                   | 3               | 4           |
| Q3T134           | SPCS1       | Signal peptidase complex subunit 1                  | 11.805  | 11.8                   | 1               | 1           | #N/A                   | #N/A            | #N/A        |
| E1BE12           | SPCS2       | Uncharacterized protein                             | 25.348  | 29.6                   | 7               | 10          | 18.7                   | 6               | 11          |
| Q3SZU5           | SPCS3       | Signal peptidase complex subunit 3                  | 20.313  | 15.6                   | 3               | 6           | 15.6                   | 3               | 9           |
| Q08DR9           | SPDL1       | Protein Spindly                                     | 69.62   | 11.6                   | 6               | 8           | #N/A                   | #N/A            | #N/A        |
| E1BJ04           | SPECC1L     | Uncharacterized protein                             | 124.03  | 1.4                    | 1               | 1           | #N/A                   | #N/A            | #N/A        |
| G3N022           | SPEG        | Uncharacterized protein                             | 355.05  | #N/A                   | #N/A            | #N/A        | 0.3                    | 1               | 1           |
| Q8MJJ1           | SPG21       | Masparidin                                          | 35.006  | 33.1                   | 9               | 11          | 16.2                   | 5               | 10          |
| A7E2Z6           | SPG7        | SPG7 protein                                        | 86.193  | 9                      | 6               | 8           | 7.7                    | 6               | 9           |
| Q2KJ54           | SPINT2      | Serine peptidase inhibitor, Kunitz                  | 28.002  | 4                      | 1               | 1           | 5.6                    | 1               | 2           |
| Q08DX7           | SPNS1       | Protein spinster homolog 1                          | 56.519  | 15.2                   | 5               | 6           | #N/A                   | #N/A            | #N/A        |
| Q27967           | SPP2        | Secreted phosphoprotein 24                          | 23.134  | 16.3                   | 3               | 4           | 10.3                   | 2               | 3           |
| F1MG08           | SPPL2A      | Uncharacterized protein (Fragment)                  | 57.074  | 1.8                    | 1               | 1           | #N/A                   | #N/A            | #N/A        |
| E1BKF8           | SPPL2B      | Uncharacterized protein                             | 63.707  | 4.8                    | 3               | 4           | 5                      | 4               | 6           |
| Q17QK8           | SPR         | Sepiapterin reductase                               | 28.939  | 44.2                   | 9               | 19          | 19.5                   | 5               | 10          |
| Q0P5G9           | SPRYD4      | SPRY domain containing 4                            | 22.985  | 9.7                    | 2               | 2           | #N/A                   | #N/A            | #N/A        |
| Q2T9X3           | SPRYD7      | SPRY domain-containing protein 7                    | 21.637  | 5.1                    | 1               | 1           | 13.8                   | 2               | 4           |
| E1BMN5           | SPTBN2      | Uncharacterized protein                             | 271.99  | 0.3                    | 1               | 1           | #N/A                   | #N/A            | #N/A        |
| Q3MHG1           | SPTLC1      | Serine palmitoyltransferase 1                       | 52.787  | #N/A                   | #N/A            | #N/A        | 3.4                    | 2               | 2           |
| A5D9A8           | SQLE        | Squalene epoxidase                                  | 63.56   | 19.4                   | 8               | 12          | 3                      | 2               | 2           |
| F1MKF8           | SQRDL       | Uncharacterized protein                             | 39.163  | 26.2                   | 9               | 16          | 17.2                   | 7               | 25          |
| F1MIE2           | SQSTM1      | Uncharacterized protein                             | 47.897  | 16.4                   | 5               | 6           | 11.6                   | 3               | 6           |
| Q2HJF6           | SRA1        | Steroid receptor RNA activator 1                    | 24.943  | 6.6                    | 1               | 3           | #N/A                   | #N/A            | #N/A        |
| Q0IIA3           | SRI         | Sorcin                                              | 20.331  | 53                     | 9               | 16          | 32.2                   | 6               | 19          |
| E1BM12           | SRM         | Uncharacterized protein                             | 33.904  | 17.9                   | 4               | 4           | #N/A                   | #N/A            | #N/A        |
| Q2T9U1           | SRP54       | Signal recognition particle 54 kDa                  | 55.704  | 2.4                    | 1               | 1           | 7.1                    | 4               | 6           |
| A6QQW3           | SRP68       | Signal recognition particle subunit                 | 70.507  | 7.2                    | 4               | 5           | 4.2                    | 3               | 3           |
| E1BB38           | SRP72       | Signal recognition particle subunit                 | 74.727  | 1.6                    | 1               | 2           | 2.2                    | 2               | 2           |

| Accession number | Gene symbol | Discription                                                     | MW(kDa) | Biological Replicate 1 |                 |             | Biological Replicate 2 |                 |             |
|------------------|-------------|-----------------------------------------------------------------|---------|------------------------|-----------------|-------------|------------------------|-----------------|-------------|
|                  |             |                                                                 |         | Sequence coverage(%)   | Unique peptides | MS/MS count | Sequence coverage(%)   | Unique peptides | MS/MS count |
| E1BNV4           | SRPK1       | Uncharacterized protein                                         | 72.504  | 4.1                    | 2               | 2           | #N/A                   | #N/A            | #N/A        |
| F1MLG1           | SRPRB       | Uncharacterized protein                                         | 29.716  | 38.7                   | 9               | 9           | 37.6                   | 8               | 18          |
| F1MQX1           | SRPX        | Uncharacterized protein                                         | 50.944  | 7.4                    | 3               | 11          | #N/A                   | #N/A            | #N/A        |
| A0JN14           | SRR         | Serine racemase                                                 | 36.18   | 3.6                    | 1               | 1           | #N/A                   | #N/A            | #N/A        |
| F1MIT4           | SRRT        | Serrate RNA effector molecule                                   | 100.62  | 1.6                    | 2               | 3           | #N/A                   | #N/A            | #N/A        |
| Q0VCY7           | SRSF1       | Serine/arginine-rich splicing                                   | 27.744  | 18.1                   | 3               | 5           | #N/A                   | #N/A            | #N/A        |
| Q3MHR5           | SRSF2       | Serine/arginine-rich splicing                                   | 25.476  | 17.2                   | 4               | 4           | #N/A                   | #N/A            | #N/A        |
| Q3SZR8           | SRSF3       | Serine/arginine-rich splicing                                   | 19.329  | 18.3                   | 2               | 3           | 17.7                   | 3               | 3           |
| Q3B7L6           | SRSF6       | Serine/arginine-rich splicing                                   | 39.646  | 2.6                    | 1               | 1           | #N/A                   | #N/A            | #N/A        |
| Q3T106           | SRSF7       | Serine/arginine-rich splicing                                   | 26.941  | 17.9                   | 3               | 7           | #N/A                   | #N/A            | #N/A        |
| P10881           | SSB         | Lupus La protein homolog                                        | 46.533  | 37.1                   | 14              | 24          | 4.7                    | 3               | 4           |
| E1BIZ2           | SSH1        | Uncharacterized protein                                         | 111.12  | 2.2                    | 1               | 2           | #N/A                   | #N/A            | #N/A        |
| F1MI92           | SSH3        | Uncharacterized protein                                         | 71.187  | 25                     | 14              | 37          | 12.8                   | 8               | 15          |
| A6QLP7           | SSR1        | Translocon-associated protein subunit alpha                     | 32.054  | 11.9                   | 3               | 6           | 6.6                    | 2               | 3           |
| Q3SZ87           | SSR3        | Translocon-associated protein subunit gamma                     | 21.074  | 7.6                    | 1               | 4           | #N/A                   | #N/A            | #N/A        |
| Q2TBX5           | SSR4        | Translocon-associated protein subunit delta                     | 18.814  | 19.8                   | 3               | 5           | 24.4                   | 3               | 3           |
| F6QYV9           | SSRP1       | Uncharacterized protein                                         | 81.071  | 13.7                   | 8               | 9           | 3.8                    | 3               | 6           |
| F1MVW1           | SSSCA1      | Uncharacterized protein                                         | 21.554  | 21.1                   | 3               | 7           | 11.1                   | 3               | 3           |
| Q17QI2           | SSU72       | RNA polymerase II subunit A C-terminal domain phosphatase SSU72 | 22.588  | 5.7                    | 1               | 1           | #N/A                   | #N/A            | #N/A        |
| A7E3S8           | ST13        | Heat shock 70kD protein binding                                 | 41.444  | 28.2                   | 7               | 19          | 18.4                   | 5               | 21          |
| Q17QR2           | STAMPB      | STAM binding protein                                            | 48.067  | 7.3                    | 3               | 3           | 9.5                    | 4               | 6           |
| F1MXU5           | STARD10     | Uncharacterized protein                                         | 33.005  | 24.1                   | 6               | 8           | 6.9                    | 2               | 6           |
| B0JYL6           | STAT1       | Signal transducer and activator of transcription                | 86.929  | 18.3                   | 11              | 16          | #N/A                   | #N/A            | #N/A        |
| Q9TUM3           | STAT5B      | Signal transducer and activator of transcription 5B             | 89.99   | 1.1                    | 1               | 1           | #N/A                   | #N/A            | #N/A        |
| F1MH34           | STAU1       | Uncharacterized protein (Fragment)                              | 76.89   | 15.6                   | 11              | 18          | 13.9                   | 9               | 17          |
| F1MYP9           | STEAP3      | Uncharacterized protein (Fragment)                              | 54.45   | 3.1                    | 1               | 1           | #N/A                   | #N/A            | #N/A        |

| Accession number | Gene symbol | Discription                                                            | MW(kDa) | Biological Replicate 1 |                 |             | Biological Replicate 2 |                 |             |
|------------------|-------------|------------------------------------------------------------------------|---------|------------------------|-----------------|-------------|------------------------|-----------------|-------------|
|                  |             |                                                                        |         | Sequence coverage(%)   | Unique peptides | MS/MS count | Sequence coverage(%)   | Unique peptides | MS/MS count |
| Q3ZBZ8           | STIP1       | Stress-induced-phosphoprotein 1                                        | 62.481  | 60                     | 43              | 124         | 47.1                   | 32              | 107         |
| F1ML95           | STK11IP     | Uncharacterized protein (Fragment)                                     | 118.25  | 8.5                    | 6               | 8           | 4.3                    | 4               | 7           |
| Q2KI50           | STK16       | Serine/threonine kinase 16                                             | 34.788  | 10.5                   | 3               | 4           | 7.2                    | 2               | 2           |
| E1BBF0           | STK31       | Uncharacterized protein                                                | 115.22  | 13.6                   | 11              | 14          | 3.7                    | 4               | 5           |
| F1MUU2           | STK35       | Uncharacterized protein                                                | 44.646  | 23.1                   | 9               | 11          | 12.9                   | 6               | 8           |
| F1MBL1           | STK38       | Serine/threonine-protein kinase 38                                     | 54.168  | 3.7                    | 1               | 1           | #N/A                   | #N/A            | #N/A        |
| Q32LA8           | STK39       | Serine threonine kinase 39 (STE20/SPS1 homolog, yeast)                 | 24.892  | 28.7                   | 3               | 3           | #N/A                   | #N/A            | #N/A        |
| Q3T0C7           | STMN1       | Stathmin                                                               | 17.302  | 30.9                   | 3               | 11          | 25.5                   | 2               | 11          |
| Q3MHJ8           | STMN2       | Stathmin                                                               | 20.828  | 15.1                   | 1               | 2           | 15.1                   | 1               | 4           |
| A5PJA6           | STOML2      | Stomatin (EPB72)-like 2                                                | 38.733  | 66                     | 18              | 36          | 23.6                   | 9               | 35          |
| Q0V8E7           | STRA6       | Stimulated by retinoic acid gene 6 protein homolog                     | 73.761  | 15.6                   | 8               | 19          | 12                     | 6               | 11          |
| Q5E959           | STRAP       | Serine-threonine kinase receptor-associated protein                    | 38.485  | 50.9                   | 14              | 26          | 16.3                   | 5               | 10          |
| Q0P5J8           | STRIP1      | Striatin-interacting protein 1                                         | 95.686  | 11.8                   | 8               | 10          | 3.9                    | 3               | 7           |
| E1BFB3           | STRN        | Uncharacterized protein                                                | 86.209  | 17.7                   | 9               | 12          | 7.4                    | 6               | 10          |
| Q2KJI2           | STT3A       | Dolichyl-diphosphooligosaccharide--protein glycosyltransferase subunit | 80.655  | 15.2                   | 10              | 24          | 16.9                   | 12              | 39          |
| A5D7G6           | STT3B       | STT3B protein                                                          | 93.216  | 7.8                    | 5               | 8           | 8.2                    | 6               | 8           |
| F1MUH4           | STUB1       | Uncharacterized protein                                                | 34.833  | 68.5                   | 20              | 59          | 40.7                   | 14              | 35          |
| E1BQ02           | STX10       | Uncharacterized protein                                                | 28.316  | 4.4                    | 1               | 3           | #N/A                   | #N/A            | #N/A        |
| A7MAZ2           | STX12       | STX12 protein                                                          | 31.355  | 46.7                   | 10              | 21          | 26.3                   | 6               | 15          |
| E1BIQ3           | STX16       | Uncharacterized protein                                                | 37.277  | 21.2                   | 7               | 12          | 2.5                    | 1               | 2           |
| Q5E9Y2           | STX17       | Syntaxin-17                                                            | 33.559  | 24.2                   | 6               | 20          | 7.6                    | 2               | 5           |
| F1N1W6           | STX18       | Uncharacterized protein                                                | 38.673  | 2.4                    | 1               | 2           | 10.1                   | 4               | 5           |
| F1MDL3           | STX3        | Uncharacterized protein (Fragment)                                     | 31.997  | 26.9                   | 9               | 14          | 14.3                   | 4               | 5           |
| Q3SWZ3           | STX4        | Syntaxin-4                                                             | 34.4    | 7.4                    | 2               | 5           | 3.7                    | 1               | 1           |
| Q08DB5           | STX5        | Syntaxin-5                                                             | 39.546  | 14.4                   | 4               | 8           | 12.1                   | 5               | 6           |
| A2VE18           | STX6        | STX6 protein                                                           | 29.073  | 17.3                   | 5               | 8           | 4.3                    | 1               | 5           |
| Q3ZBT5           | STX7        | Syntaxin-7                                                             | 29.656  | 19.2                   | 5               | 9           | 6.5                    | 2               | 4           |
| Q3T075           | STX8        | Syntaxin-8                                                             | 26.759  | 9.7                    | 2               | 3           | 6.4                    | 1               | 1           |

| Accession number | Gene symbol | Discription                                                   | MW(kDa) | Biological Replicate 1 |                 |             | Biological Replicate 2 |                 |             |
|------------------|-------------|---------------------------------------------------------------|---------|------------------------|-----------------|-------------|------------------------|-----------------|-------------|
|                  |             |                                                               |         | Sequence coverage(%)   | Unique peptides | MS/MS count | Sequence coverage(%)   | Unique peptides | MS/MS count |
| P61763           | STXBP1      | Syntaxin-binding protein 1                                    | 67.568  | 20.4                   | 9               | 15          | 9.9                    | 6               | 9           |
| F1MHC2           | STXBP2      | Uncharacterized protein                                       | 66.356  | 40                     | 20              | 36          | 16.9                   | 10              | 17          |
| F1MXB4           | STXBP3      | Uncharacterized protein                                       | 67.624  | 6.6                    | 4               | 4           | 7.1                    | 4               | 7           |
| E1BNK4           | STXBP5      | Uncharacterized protein                                       | 127.54  | 2.3                    | 2               | 2           | #N/A                   | #N/A            | #N/A        |
| Q2YDL1           | STXBP6      | Syntaxin-binding protein 6                                    | 23.667  | 8.6                    | 2               | 2           | 4.3                    | 1               | 1           |
| A7YWC6           | SUB1        | SUB1 protein                                                  | 14.369  | 18.9                   | 2               | 4           | #N/A                   | #N/A            | #N/A        |
| Q58DR8           | SUCLG1      | Succinyl-CoA ligase [ADP/GDP-forming] subunit alpha,          | 36.166  | 21.7                   | 7               | 22          | 22.5                   | 7               | 24          |
| Q3MHX5           | SUCLG2      | Succinyl-CoA ligase [GDP-forming] subunit beta, mitochondrial | 46.69   | 47.7                   | 18              | 33          | 18.1                   | 12              | 28          |
| E1BE55           | SUGP2       | Uncharacterized protein                                       | 121.57  | 1                      | 1               | 1           | 1.3                    | 1               | 1           |
| Q2KIK0           | SUGT1       | Suppressor of G2 allele of SKP1                               | 38.074  | 74.3                   | 24              | 95          | 49.1                   | 14              | 65          |
| Q17QV7           | SULT4A1     | Sulfotransferase family 4A, member                            | 33.081  | 9.5                    | 3               | 3           | #N/A                   | #N/A            | #N/A        |
| Q0P5L5           | SUMF1       | Sulfatase-modifying factor 1                                  | 40.342  | 4                      | 1               | 1           | 4                      | 1               | 1           |
| Q58CP2           | SUMF2       | Sulfatase-modifying factor 2                                  | 33.829  | 19.3                   | 4               | 7           | #N/A                   | #N/A            | #N/A        |
| P61955           | SUMO2       | Small ubiquitin-related modifier 2                            | 10.871  | 23.2                   | 2               | 4           | 23.2                   | 2               | 7           |
| F6RUR3           | SUOX        | Uncharacterized protein                                       | 60.482  | 6.4                    | 3               | 3           | 4.6                    | 3               | 5           |
| E1BNP8           | SUPT16H     | Uncharacterized protein                                       | 119.93  | 8.1                    | 8               | 12          | 4.1                    | 5               | 6           |
| A6QP28           | SUPV3L1     | SUPV3L1 protein                                               | 58.835  | #N/A                   | #N/A            | #N/A        | 6                      | 3               | 4           |
| F1N6P2           | SURF1       | Uncharacterized protein                                       | 82.121  | 12.1                   | 8               | 30          | 7.9                    | 6               | 11          |
| F1MSE7           | SUSD2       | Uncharacterized protein                                       | 90.052  | #N/A                   | #N/A            | #N/A        | 2.7                    | 3               | 3           |
| Q3T161           | SYAP1       | Synapse associated protein 1, SAP47 homolog (Drosophila)      | 40.787  | 27.1                   | 8               | 12          | 13.7                   | 3               | 5           |
| E1BJF6           | SYMPK       | Uncharacterized protein                                       | 140.97  | #N/A                   | #N/A            | #N/A        | 1.3                    | 2               | 2           |
| F1MCT8           | SYNCRIP     | Uncharacterized protein (Fragment)                            | 71.174  | 21.9                   | 10              | 21          | 8.8                    | 7               | 14          |
| A7E3W5           | SYNGR2      | Synaptogyrin-2                                                | 25.139  | #N/A                   | #N/A            | #N/A        | 3.6                    | 1               | 2           |
| E1BD68           | SYNJ1       | Synaptojanin-1                                                | 134.83  | 4.1                    | 4               | 4           | 1.2                    | 1               | 2           |
| Q3TOC9           | SYNJ2BP     | Synaptojanin-2-binding protein                                | 15.81   | 33.8                   | 3               | 4           | 29.7                   | 4               | 11          |
| F1MI41           | SYNRG       | Uncharacterized protein                                       | 147.41  | 4                      | 6               | 9           | 1.3                    | 2               | 2           |
| A8PVV5           | SYPL1       | SYPL1 protein                                                 | 19.476  | 10.3                   | 2               | 2           | #N/A                   | #N/A            | #N/A        |
| Q1RMQ3           | SYS1        | Protein SYS1 homolog                                          | 17.444  | 5.8                    | 1               | 1           | #N/A                   | #N/A            | #N/A        |
| F1MY23           | SYTL2       | Synaptotagmin-like protein 2                                  | 105.79  | 4.7                    | 4               | 6           | 0.8                    | 1               | 2           |

| Accession number | Gene symbol | Discription                                                            | MW(kDa) | Biological Replicate 1 |                 |             | Biological Replicate 2 |                 |             |
|------------------|-------------|------------------------------------------------------------------------|---------|------------------------|-----------------|-------------|------------------------|-----------------|-------------|
|                  |             |                                                                        |         | Sequence coverage(%)   | Unique peptides | MS/MS count | Sequence coverage(%)   | Unique peptides | MS/MS count |
| E1BPE2           | SYTL4       | Uncharacterized protein                                                | 76.202  | 1.3                    | 1               | 1           | #N/A                   | #N/A            | #N/A        |
| E1BAK9           | SYVN1       | Uncharacterized protein                                                | 67.098  | 18                     | 10              | 20          | 5.7                    | 4               | 10          |
| F1MSQ8           | TACC1       | Uncharacterized protein (Fragment)                                     | 78.462  | #N/A                   | #N/A            | #N/A        | 2.2                    | 2               | 3           |
| A6QL93           | TACC3       | TACC3 protein                                                          | 86.367  | 32.6                   | 28              | 69          | 24.4                   | 24              | 72          |
| E1BJK7           | TAC01       | Uncharacterized protein                                                | 32.244  | #N/A                   | #N/A            | #N/A        | 4                      | 1               | 1           |
| F1MSN2           | TACSTD2     | Uncharacterized protein                                                | 35.441  | 7.8                    | 2               | 3           | #N/A                   | #N/A            | #N/A        |
| Q3SZP8           | TADA2A      | Transcriptional adapter 2-alpha                                        | 51.468  | 3.6                    | 1               | 1           | #N/A                   | #N/A            | #N/A        |
| E1BGX1           | TAF15       | Uncharacterized protein                                                | 50.926  | 4.9                    | 1               | 1           | 3.2                    | 2               | 4           |
| F1MDZ8           | TAF6L       | Uncharacterized protein                                                | 72.727  | 1.7                    | 1               | 2           | #N/A                   | #N/A            | #N/A        |
| Q9TS87           | TAGLN       | Transgelin                                                             | 22.599  | 7                      | 1               | 1           | 11.4                   | 2               | 3           |
| Q5E9F5           | TAGLN2      | Transgelin-2                                                           | 22.426  | 29.6                   | 4               | 5           | #N/A                   | #N/A            | #N/A        |
| Q3ZBY2           | TAGLN3      | Transgelin-3                                                           | 22.484  | 4                      | 1               | 1           | #N/A                   | #N/A            | #N/A        |
| G5E5C8           | TALD01      | Transaldolase                                                          | 37.681  | 50.4                   | 20              | 56          | 34.7                   | 14              | 51          |
| Q32L81           | TAMM41      | Mitochondrial translocator assembly and maintenance protein 41 homolog | 37.42   | 6                      | 1               | 1           | 4.8                    | 2               | 2           |
| Q29RZ5           | TANGO2      | Transport and Golgi organization protein 2 homolog                     | 30.829  | 11.6                   | 2               | 2           | 6.2                    | 2               | 2           |
| Q3ZBV8           | TARS        | Threonine--tRNA ligase, cytoplasmic                                    | 83.491  | 36.4                   | 24              | 53          | 20.6                   | 16              | 23          |
| A6QNM8           | TARSL2      | Probable threonine--tRNA ligase 2, cytoplasmic                         | 83.075  | 2.8                    | 2               | 2           | #N/A                   | #N/A            | #N/A        |
| Q148G4           | TATDN1      | Putative deoxyribonuclease TATDN1                                      | 33.886  | 14.8                   | 5               | 8           | 9.8                    | 3               | 3           |
| Q2KJE0           | TAX1BP1     | Tax1-binding protein 1 homolog                                         | 94.058  | 13.6                   | 11              | 12          | 9.2                    | 9               | 12          |
| O97790           | TBC1D1      | TBC1 domain family member 1                                            | 132.1   | 1                      | 1               | 1           | #N/A                   | #N/A            | #N/A        |
| F1MB46           | TBC1D10A    | Uncharacterized protein (Fragment)                                     | 49.716  | 14                     | 7               | 9           | 4.6                    | 2               | 4           |
| F1MJZ7           | TBC1D10B    | Uncharacterized protein                                                | 87.074  | 1.9                    | 1               | 1           | 2                      | 2               | 2           |
| F1MXD4           | TBC1D13     | Uncharacterized protein                                                | 46.475  | 15.3                   | 5               | 7           | #N/A                   | #N/A            | #N/A        |
| F1N090           | TBC1D15     | Uncharacterized protein (Fragment)                                     | 77.578  | 31.7                   | 20              | 36          | 14.2                   | 9               | 18          |
| F1MU30           | TBC1D23     | Uncharacterized protein                                                | 78.471  | 4                      | 2               | 2           | #N/A                   | #N/A            | #N/A        |
| Q29RJ2           | TBC1D24     | TBC1 domain family member 24                                           | 58.425  | 13.2                   | 7               | 8           | 2.1                    | 1               | 2           |
| Q5E9C4           | TBC1D7      | TBC1 domain family member 7                                            | 33.904  | 14.7                   | 4               | 6           | #N/A                   | #N/A            | #N/A        |
| F1MS54           | TBC1D9B     | Uncharacterized protein                                                | 141.22  | 4                      | 4               | 5           | #N/A                   | #N/A            | #N/A        |
| P48427           | TBCA        | Tubulin-specific chaperone A                                           | 12.707  | 23.1                   | 4               | 6           | 24.1                   | 3               | 7           |



| Accession number | Gene symbol | Discription                                             | MW(kDa) | Biological Replicate 1 |                 |             | Biological Replicate 2 |                 |             |
|------------------|-------------|---------------------------------------------------------|---------|------------------------|-----------------|-------------|------------------------|-----------------|-------------|
|                  |             |                                                         |         | Sequence coverage(%)   | Unique peptides | MS/MS count | Sequence coverage(%)   | Unique peptides | MS/MS count |
| Q5E951           | TBCB        | Tubulin-folding cofactor B                              | 27.517  | 36.5                   | 8               | 17          | 23.4                   | 6               | 11          |
| Q3SZE9           | TBCC        | Tubulin-specific chaperone C                            | 38.902  | 21.7                   | 6               | 12          | #N/A                   | #N/A            | #N/A        |
| A7MB50           | TBCD        | TBCD protein                                            | 129.96  | 34.1                   | 36              | 80          | 12.4                   | 16              | 32          |
| Q32KS0           | TBCE        | Tubulin-specific chaperone E                            | 59.326  | 23.5                   | 13              | 26          | 18                     | 11              | 23          |
| F1MCE2           | TBCEL       | Uncharacterized protein                                 | 48.114  | 26.2                   | 10              | 12          | #N/A                   | #N/A            | #N/A        |
| F1MSR5           | TBCK        | Uncharacterized protein                                 | 100.79  | 1.8                    | 2               | 2           | #N/A                   | #N/A            | #N/A        |
| Q0P5H6           | TBL2        | Transducin (Beta)-like 2                                | 49.911  | 35.4                   | 14              | 22          | 26.9                   | 11              | 29          |
| F1MP97           | TBRG4       | Protein TBRG4 (Fragment)                                | 62.362  | 5.5                    | 3               | 4           | #N/A                   | #N/A            | #N/A        |
| Q29RL9           | TCEA1       | Transcription elongation factor A protein 1             | 33.89   | 24.3                   | 8               | 9           | 25.2                   | 6               | 13          |
| Q2KII4           | TCEB1       | Transcription elongation factor B polypeptide 1         | 12.473  | 45.5                   | 4               | 11          | 27.7                   | 3               | 9           |
| Q3SZ32           | TCEB2       | Elongin B                                               | 13.17   | 60.2                   | 7               | 11          | 39                     | 6               | 15          |
| E1BB92           | TCL1A       | Uncharacterized protein                                 | 13.351  | 33                     | 2               | 4           | 7                      | 1               | 4           |
| G3N1Y7           | TCL1B       | Uncharacterized protein (Fragment)                      | 12.439  | 25.7                   | 4               | 6           | #N/A                   | #N/A            | #N/A        |
| Q9XSC9           | TCN2        | Transcobalamin-2                                        | 47.958  | 22.7                   | 10              | 16          | 9                      | 4               | 8           |
| E1BHU1           | TCOF1       | Uncharacterized protein                                 | 151.29  | 1.3                    | 2               | 2           | #N/A                   | #N/A            | #N/A        |
| G5E531           | TCP1        | T-complex protein 1 subunit alpha                       | 60.222  | 51.6                   | 25              | 87          | 29.9                   | 16              | 79          |
| F1MQ24           | TCP11L1     | Uncharacterized protein                                 | 56.617  | 12.6                   | 5               | 9           | 4.5                    | 2               | 3           |
| F1MST1           | TDP1        | Uncharacterized protein                                 | 68.381  | #N/A                   | #N/A            | #N/A        | 2.6                    | 2               | 2           |
| A7YWI9           | TDP2        | Tyrosyl-DNA phosphodiesterase 2                         | 40.826  | 5.5                    | 1               | 1           | #N/A                   | #N/A            | #N/A        |
| A6QLE1           | TDRD7       | Tudor domain-containing protein 7                       | 123.9   | 10.4                   | 12              | 14          | 5.6                    | 8               | 16          |
| F1MUI1           | TDRKH       | Uncharacterized protein                                 | 62.649  | 47.7                   | 24              | 77          | 22.3                   | 12              | 63          |
| Q3ZCD7           | TECR        | Very-long-chain enoyl-CoA reductase                     | 36.072  | 24.7                   | 10              | 28          | 14.3                   | 5               | 13          |
| Q0VCT3           | TERF2IP     | Telomeric repeat-binding factor 2-interacting protein 1 | 44.221  | 3.5                    | 1               | 1           | #N/A                   | #N/A            | #N/A        |
| Q2YDE9           | TES         | Testin                                                  | 48.049  | 34.9                   | 12              | 21          | 22.8                   | 8               | 16          |
| F1MDB6           | TESC        | Uncharacterized protein (Fragment)                      | 19.894  | 25.1                   | 4               | 6           | 9.9                    | 2               | 3           |
| F1MND3           | TEX10       | Uncharacterized protein                                 | 105.78  | 1.7                    | 2               | 2           | 3.8                    | 4               | 5           |
| F1MJA6           | TEX2        | Uncharacterized protein                                 | 116.29  | 2.4                    | 3               | 4           | 4.2                    | 5               | 7           |
| Q32L30           | TEX264      | Testis expressed 264                                    | 33.812  | 6.4                    | 1               | 1           | 3.2                    | 1               | 3           |
| Q3ZC52           | TEX30       | Testis-expressed sequence 30                            | 25.181  | 12.5                   | 2               | 2           | #N/A                   | #N/A            | #N/A        |
| Q0II87           | TFAM        | Transcription factor A,                                 | 28.906  | 16.7                   | 4               | 4           | 13                     | 4               | 6           |

| Accession number | Gene symbol | Discription                                                      | MW(kDa) | Biological Replicate 1 |                 |             | Biological Replicate 2 |                 |             |
|------------------|-------------|------------------------------------------------------------------|---------|------------------------|-----------------|-------------|------------------------|-----------------|-------------|
|                  |             |                                                                  |         | Sequence coverage(%)   | Unique peptides | MS/MS count | Sequence coverage(%)   | Unique peptides | MS/MS count |
| Q2TBQ0           | TFB1M       | Mitochondrial dimethyladenosine transferase 1                    | 38.883  | 2.6                    | 1               | 1           | #N/A                   | #N/A            | #N/A        |
| F6PW02           | TFG         | Uncharacterized protein                                          | 43.204  | 36.2                   | 11              | 42          | 20.2                   | 6               | 16          |
| E1BIG6           | TFRC        | Uncharacterized protein                                          | 83.166  | 4.5                    | 4               | 4           | 7                      | 6               | 10          |
| F1MBS3           | TGFBI       | Transforming growth factor-beta-induced protein ig-h3 (Fragment) | 72.251  | 32.7                   | 18              | 43          | 14.5                   | 9               | 17          |
| A6QQ20           | TGOLN2      | TGOLN2 protein (Fragment)                                        | 33.444  | 6.8                    | 4               | 7           | 8.7                    | 3               | 4           |
| Q3SWW8           | THBS4       | Thrombospondin-4                                                 | 105.97  | 4                      | 3               | 3           | 3.4                    | 3               | 6           |
| A6QQ83           | THEM2       | THEM2 protein                                                    | 16.857  | 8.4                    | 1               | 5           | 14.8                   | 2               | 7           |
| A1A4L1           | THEM4       | Acyl-coenzyme A thioesterase THEM4                               | 26.812  | 16.9                   | 4               | 6           | #N/A                   | #N/A            | #N/A        |
| A6H707           | THEM6       | Protein THEM6                                                    | 23.749  | 66.3                   | 16              | 31          | 42.8                   | 12              | 30          |
| Q05B50           | THG1L       | Probable tRNA (His)                                              | 34.739  | 10.1                   | 3               | 3           | 3.7                    | 1               | 1           |
| Q29RH4           | THOC3       | THO complex subunit 3                                            | 38.872  | 4.8                    | 2               | 2           | 8                      | 3               | 4           |
| Q1JPJ8           | THOP1       | Thimet oligopeptidase                                            | 78.138  | 59.8                   | 41              | 127         | 30.9                   | 25              | 99          |
| Q8MKF1           | THTPA       | Thiamine-triphosphatase                                          | 23.983  | 17.8                   | 4               | 6           | 8.7                    | 2               | 2           |
| Q24K03           | THUMPD1     | THUMP domain-containing protein 1                                | 39.753  | 14.3                   | 5               | 9           | 6.7                    | 3               | 6           |
| Q2T9W2           | THUMPD3     | THUMP domain-containing protein 3                                | 56.674  | 2.2                    | 1               | 1           | 4.3                    | 2               | 2           |
| F2Z4H8           | TIAL1       | Uncharacterized protein                                          | 42.253  | 12.6                   | 4               | 5           | 7.4                    | 3               | 6           |
| Q1JQA7           | TIGAR       | Fructose-2,6-bisphosphatase TIGAR                                | 29.466  | 31.9                   | 7               | 12          | 17.4                   | 4               | 10          |
| F6RJY8           | TIMM13      | Uncharacterized protein                                          | 16.172  | #N/A                   | #N/A            | #N/A        | 9.3                    | 1               | 1           |
| Q2HJE9           | TIMM17B     | Mitochondrial import inner membrane translocase subunit Tim17-B  | 18.321  | 25                     | 4               | 5           | #N/A                   | #N/A            | #N/A        |
| Q3SZV6           | TIMM21      | Mitochondrial import inner membrane translocase subunit Tim21    | 27.938  | 9.8                    | 2               | 2           | 18.9                   | 4               | 10          |
| A4IFL0           | TIMM23      | Mitochondrial import inner membrane translocase subunit Tim23    | 21.827  | 12.9                   | 2               | 2           | #N/A                   | #N/A            | #N/A        |
| E1B844           | TIMM44      | Uncharacterized protein                                          | 51.445  | 49.1                   | 25              | 71          | 35.9                   | 18              | 60          |
| Q3SZB3           | TIMM50      | Mitochondrial import inner membrane translocase subunit TIM50    | 40.108  | 27.3                   | 8               | 21          | 13.8                   | 6               | 9           |
| A3KN17           | TINF2       | TINF2 protein                                                    | 49.795  | 2.2                    | 1               | 1           | 4                      | 2               | 2           |
| Q29RT7           | TIPRL       | TIP41, TOR signaling pathway regulator-like (S. cerevisiae)      | 28.161  | 31                     | 5               | 9           | 13.2                   | 3               | 9           |

| Accession number | Gene symbol | Discription                                               | MW(kDa) | Biological Replicate 1 |                 |             | Biological Replicate 2 |                 |             |
|------------------|-------------|-----------------------------------------------------------|---------|------------------------|-----------------|-------------|------------------------|-----------------|-------------|
|                  |             |                                                           |         | Sequence coverage(%)   | Unique peptides | MS/MS count | Sequence coverage(%)   | Unique peptides | MS/MS count |
| F1N2D3           | TJP1        | Uncharacterized protein (Fragment)                        | 190.4   | 3.5                    | 5               | 5           | 1.9                    | 3               | 5           |
| F1MTP9           | TJP2        | Uncharacterized protein                                   | 92.733  | 1.5                    | 1               | 1           | #N/A                   | #N/A            | #N/A        |
| F1MNI9           | TK2         | Uncharacterized protein (Fragment)                        | 34.814  | 9.8                    | 2               | 3           | 5.9                    | 2               | 2           |
| A7E3W4           | TKT         | Transketolase                                             | 64.875  | 27.9                   | 18              | 33          | 12.4                   | 9               | 19          |
| Q2NL26           | TKTL1       | Transketolase-like protein 1                              | 64.966  | 3.9                    | 2               | 3           | 1.5                    | 1               | 2           |
| F1MTK2           | TLDC1       | Uncharacterized protein                                   | 50.25   | 25.4                   | 11              | 15          | 11.8                   | 6               | 11          |
| F1MIL2           | TLE6        | Uncharacterized protein (Fragment)                        | 50.5    | 40.2                   | 19              | 105         | 31.9                   | 15              | 95          |
| F1MF35           | TLL2        | Uncharacterized protein (Fragment)                        | 100.69  | 22.2                   | 19              | 37          | 16.1                   | 11              | 32          |
| Q8WMV1           | TM7SF2      | Delta(14)-sterol reductase                                | 46.75   | #N/A                   | #N/A            | #N/A        | 3.1                    | 1               | 1           |
| Q08DX3           | TM7SF3      | Transmembrane 7 superfamily member                        | 64.454  | 11.4                   | 6               | 15          | 5.3                    | 3               | 9           |
| F1MCZ2           | TM9SF1      | Transmembrane 9 superfamily member                        | 69.191  | 2                      | 1               | 1           | #N/A                   | #N/A            | #N/A        |
| F1N672           | TM9SF2      | Uncharacterized protein (Fragment)                        | 76.269  | 9.8                    | 6               | 15          | 4.4                    | 3               | 10          |
| E1BMF1           | TM9SF3      | Uncharacterized protein                                   | 67.528  | 12.4                   | 10              | 26          | 12.1                   | 9               | 36          |
| A5D7E2           | TM9SF4      | Transmembrane 9 superfamily member                        | 74.366  | 11.7                   | 7               | 14          | 8.1                    | 6               | 14          |
| Q0V882           | TMBIM6      | Bax inhibitor 1                                           | 26.365  | 3.8                    | 2               | 3           | #N/A                   | #N/A            | #N/A        |
| F1N546           | TMCC3       | Uncharacterized protein                                   | 53.561  | 1.9                    | 1               | 1           | #N/A                   | #N/A            | #N/A        |
| Q3TON3           | TMC01       | Transmembrane and coiled-coil domain-containing protein 1 | 21.175  | 4.3                    | 1               | 1           | #N/A                   | #N/A            | #N/A        |
| Q2TBK5           | TMED1       | Transmembrane emp24 domain-containing protein 1           | 25.137  | 4                      | 1               | 1           | 4                      | 1               | 3           |
| Q5E971           | TMED10      | Transmembrane emp24 domain-containing protein 10          | 24.827  | 34.7                   | 6               | 23          | 28.8                   | 6               | 35          |
| C3V9V7           | TMED2       | RNP24                                                     | 22.733  | 32.8                   | 6               | 13          | 15.9                   | 4               | 9           |
| A2VDW4           | TMED3       | Transmembrane emp24 protein transport domain containing 3 | 24.8    | 37.2                   | 9               | 19          | 27.1                   | 6               | 12          |
| F1N6C2           | TMED4       | Uncharacterized protein (Fragment)                        | 27.506  | 17.8                   | 4               | 12          | 15.4                   | 5               | 10          |
| Q2KJ84           | TMED5       | Transmembrane emp24 domain-containing protein 5           | 25.874  | 5.3                    | 1               | 3           | #N/A                   | #N/A            | #N/A        |
| A4IFT6           | TMED7       | TMED7 protein                                             | 25.335  | 14.7                   | 3               | 7           | 14.2                   | 3               | 8           |
| E1BNI6           | TMED8       | Uncharacterized protein                                   | 35.87   | #N/A                   | #N/A            | #N/A        | 4                      | 1               | 2           |
| Q3T133           | TMED9       | Transmembrane emp24 domain-containing protein 9           | 27.298  | 29.4                   | 7               | 21          | 12.8                   | 4               | 19          |

| Accession number | Gene symbol | Discription                                    | MW(kDa) | Biological Replicate 1 |                 |             | Biological Replicate 2 |                 |             |
|------------------|-------------|------------------------------------------------|---------|------------------------|-----------------|-------------|------------------------|-----------------|-------------|
|                  |             |                                                |         | Sequence coverage(%)   | Unique peptides | MS/MS count | Sequence coverage(%)   | Unique peptides | MS/MS count |
| Q5EA90           | TMEM106A    | Transmembrane protein 106A                     | 28.828  | 12.3                   | 2               | 10          | 12.3                   | 2               | 15          |
| Q29RH9           | TMEM109     | Transmembrane protein 109                      | 26.225  | 6.2                    | 1               | 2           | 3.7                    | 1               | 2           |
| A5D7N3           | TMEM11      | Transmembrane protein 11,                      | 21.478  | 22.9                   | 4               | 13          | 22.4                   | 5               | 7           |
| F1N070           | TMEM119     | Uncharacterized protein                        | 29.562  | 3.8                    | 1               | 3           | #N/A                   | #N/A            | #N/A        |
| Q05B45           | TMEM120A    | Transmembrane protein 120A                     | 40.73   | 10.5                   | 3               | 4           | 5.5                    | 2               | 4           |
| A6QPF8           | TMEM120B    | Transmembrane protein 120B                     | 40.372  | 10.6                   | 2               | 3           | 5.6                    | 2               | 2           |
| Q32L86           | TMEM126A    | Transmembrane protein 126A                     | 21.536  | 13.7                   | 2               | 5           | 9.1                    | 2               | 3           |
| Q3SZR6           | TMEM147     | Transmembrane protein 147                      | 25.321  | 11.6                   | 2               | 4           | #N/A                   | #N/A            | #N/A        |
| Q3ZCI1           | TMEM14C     | Transmembrane protein 14C                      | 11.735  | 9.6                    | 1               | 4           | 9.6                    | 1               | 9           |
| Q24JY6           | TMEM160     | Transmembrane protein 160                      | 19.465  | 38.3                   | 7               | 25          | 16                     | 4               | 14          |
| A6QQX9           | TMEM163     | Transmembrane protein 163                      | 31.195  | 16.4                   | 4               | 4           | 12.9                   | 3               | 4           |
| A0JNG0           | TMEM168     | Transmembrane protein 168                      | 79.784  | 16.4                   | 11              | 18          | 5.6                    | 5               | 6           |
| F1N3P0           | TMEM181     | Uncharacterized protein (Fragment)             | 70.346  | 1.8                    | 1               | 1           | 1.8                    | 1               | 2           |
| A2VDL9           | TMEM184B    | Transmembrane protein 184B                     | 45.489  | #N/A                   | #N/A            | #N/A        | 1.7                    | 1               | 2           |
| A7E3R1           | TMEM19      | Transmembrane protein 19                       | 36.44   | 2.1                    | 1               | 1           | #N/A                   | #N/A            | #N/A        |
| E1BL89           | TMEM192     | Uncharacterized protein (Fragment)             | 31.079  | 8.8                    | 2               | 3           | #N/A                   | #N/A            | #N/A        |
| G5E6J0           | TMEM200B    | Uncharacterized protein                        | 32.668  | 3.3                    | 1               | 23          | 3.3                    | 1               | 22          |
| Q32PFO           | TMEM201     | Transmembrane protein 201                      | 43.242  | 6.6                    | 2               | 2           | #N/A                   | #N/A            | #N/A        |
| Q32L10           | TMEM205     | Transmembrane protein 205                      | 20.97   | 22.2                   | 3               | 3           | 15.3                   | 2               | 6           |
| A4FV45           | TMEM214     | Transmembrane protein 214                      | 77.015  | #N/A                   | #N/A            | #N/A        | 3.8                    | 3               | 4           |
| A7MB75           | TMEM231     | Transmembrane protein 231                      | 36.003  | 3.8                    | 1               | 1           | #N/A                   | #N/A            | #N/A        |
| E1BD52           | TMEM245     | Transmembrane protein 245                      | 96.121  | #N/A                   | #N/A            | #N/A        | 3.3                    | 3               | 5           |
| Q3SYV1           | TMEM263     | UPF0444 transmembrane protein C12orf23 homolog | 11.721  | 8.6                    | 1               | 1           | 8.6                    | 1               | 4           |
| Q17QL5           | TMEM30A     | Transmembrane protein 30A                      | 40.683  | 11.6                   | 5               | 10          | 20.8                   | 7               | 14          |
| E1BNJ0           | TMEM33      | Uncharacterized protein                        | 27.913  | 27.2                   | 6               | 19          | 7.7                    | 2               | 6           |
| Q5E9T5           | TMEM35      | Transmembrane protein 35                       | 19.307  | 5.6                    | 2               | 2           | 18.1                   | 2               | 2           |
| Q0VC58           | TMEM38B     | Trimeric intracellular cation channel type B   | 32.451  | 10.3                   | 2               | 6           | #N/A                   | #N/A            | #N/A        |
| Q08D99           | TMEM41A     | Transmembrane protein 41A                      | 29.577  | #N/A                   | #N/A            | #N/A        | 4.9                    | 1               | 2           |
| A6QQR5           | TMEM43      | TMEM43 protein                                 | 44.791  | 55                     | 19              | 57          | 20.2                   | 10              | 25          |
| Q17QI9           | TMEM55B     | Transmembrane protein 55B                      | 29.437  | 17                     | 4               | 6           | 11.9                   | 3               | 8           |

| Accession number | Gene symbol | Discription                                         | MW(kDa) | Biological Replicate 1 |                 |             | Biological Replicate 2 |                 |             |
|------------------|-------------|-----------------------------------------------------|---------|------------------------|-----------------|-------------|------------------------|-----------------|-------------|
|                  |             |                                                     |         | Sequence coverage(%)   | Unique peptides | MS/MS count | Sequence coverage(%)   | Unique peptides | MS/MS count |
| F1MY22           | TMEM63B     | Uncharacterized protein                             | 94.759  | 3.1                    | 3               | 4           | 8.8                    | 7               | 14          |
| Q0VCH8           | TMEM65      | Transmembrane protein 65                            | 25.041  | 30.9                   | 7               | 15          | 28                     | 6               | 20          |
| Q3MHQ7           | TMEM86A     | Lysoplasmalogenase-like protein                     | 26.426  | #N/A                   | #N/A            | #N/A        | 3.3                    | 1               | 1           |
| A4FV22           | TMEM87A     | TMEM87A protein                                     | 63.373  | 10.5                   | 5               | 9           | 4.5                    | 3               | 7           |
| Q3ZCD6           | TMEM9B      | TMEM9 domain family, member B                       | 22.519  | 10.1                   | 3               | 4           | #N/A                   | #N/A            | #N/A        |
| E1BAI7           | TMOD2       | Uncharacterized protein                             | 39.528  | 8.8                    | 3               | 4           | #N/A                   | #N/A            | #N/A        |
| F1MSQ9           | TMPO        | Uncharacterized protein                             | 42.894  | 15.7                   | 5               | 7           | 10.7                   | 3               | 7           |
| Q0Z7W6           | TMX1        | Thioredoxin-related transmembrane protein 1         | 31.581  | 32.4                   | 15              | 44          | 22.7                   | 10              | 28          |
| Q2TBU2           | TMX2        | Thioredoxin-related transmembrane protein 2         | 34.028  | 26                     | 8               | 13          | 16.2                   | 5               | 18          |
| A6QL97           | TMX3        | TMX3 protein                                        | 51.729  | 8.1                    | 4               | 7           | 5.7                    | 3               | 4           |
| A6H732           | TMX4        | TMX4 protein                                        | 38.883  | 3.4                    | 1               | 1           | 3.4                    | 1               | 1           |
| A4IF78           | TNFAIP8     | Tumor necrosis factor alpha-induced protein 8       | 22.995  | 7.1                    | 2               | 2           | 4                      | 1               | 1           |
| F1MBJ7           | TNP02       | Uncharacterized protein (Fragment)                  | 116.09  | 9.1                    | 4               | 7           | 4.9                    | 2               | 3           |
| A5D7C4           | TNP03       | TNP03 protein                                       | 104.11  | #N/A                   | #N/A            | #N/A        | 1.1                    | 1               | 2           |
| Q2LGB5           | TOLLIP      | Toll-interacting protein                            | 30.081  | 21.2                   | 4               | 7           | 13.2                   | 3               | 6           |
| Q5BIP4           | TOM1        | Target of mybl                                      | 54.211  | 17.7                   | 7               | 9           | 11.8                   | 5               | 7           |
| A6QPI6           | TOMM22      | Mitochondrial import receptor subunit TOM22 homolog | 15.292  | 16.4                   | 2               | 5           | 8.6                    | 1               | 4           |
| E1BGD1           | TOMM34      | Uncharacterized protein                             | 34.699  | 57                     | 19              | 47          | 39.2                   | 12              | 35          |
| Q1LZB5           | TOMM40      | Mitochondrial import receptor subunit TOM40 homolog | 37.725  | 9.4                    | 3               | 7           | 5.5                    | 2               | 4           |
| A6QR22           | TOMM40L     | Mitochondrial import receptor subunit TOM40B        | 33.81   | 19.8                   | 6               | 13          | 12.7                   | 3               | 10          |
| Q08E34           | TOMM70A     | Translocase of outer mitochondrial membrane 70      | 67.568  | 31.5                   | 18              | 38          | 25.6                   | 17              | 53          |
| A5PK75           | TOR1A       | TOR1A protein                                       | 37.81   | 3                      | 1               | 1           | 3.3                    | 1               | 2           |
| A1A4M8           | TOR3A       | Torsin family 3, member A                           | 45.717  | 2.2                    | 1               | 1           | #N/A                   | #N/A            | #N/A        |
| F1N6L2           | TPBGL       | Uncharacterized protein (Fragment)                  | 24.808  | 4.9                    | 1               | 1           | #N/A                   | #N/A            | #N/A        |
| F1MBV6           | TPD52       | Uncharacterized protein                             | 19.875  | 6.5                    | 1               | 2           | 14.1                   | 2               | 6           |



| Accession number | Gene symbol | Discription                                     | MW(kDa) | Biological Replicate 1 |                 |             | Biological Replicate 2 |                 |             |
|------------------|-------------|-------------------------------------------------|---------|------------------------|-----------------|-------------|------------------------|-----------------|-------------|
|                  |             |                                                 |         | Sequence coverage(%)   | Unique peptides | MS/MS count | Sequence coverage(%)   | Unique peptides | MS/MS count |
| Q2TBL9           | TRAPPC4     | Trafficking protein particle complex subunit 4  | 24.264  | 29.2                   | 6               | 12          | 7.8                    | 2               | 5           |
| F1MSD6           | TRAPPC5     | Trafficking protein particle complex subunit 5  | 20.767  | 24.5                   | 5               | 5           | 13.3                   | 3               | 10          |
| Q3T086           | TRAPPC6A    | Trafficking protein particle complex subunit 6A | 17.639  | 5.7                    | 1               | 2           | 19.5                   | 3               | 7           |
| Q32L78           | TRAPPC6B    | Trafficking protein particle complex subunit 6B | 17.983  | 17.1                   | 3               | 3           | 16.5                   | 3               | 4           |
| F1MLG3           | TRAPPC8     | Uncharacterized protein (Fragment)              | 115.37  | 21.2                   | 18              | 34          | 11.4                   | 13              | 29          |
| Q32PH0           | TRAPPC9     | Trafficking protein particle complex subunit 9  | 127     | #N/A                   | #N/A            | #N/A        | 0.9                    | 1               | 4           |
| F2Z4H6           | TRIM23      | Uncharacterized protein                         | 64.707  | 1.7                    | 1               | 8           | #N/A                   | #N/A            | #N/A        |
| G3X823           | TRIM26      | Uncharacterized protein                         | 62.572  | 6                      | 2               | 2           | 4                      | 2               | 3           |
| E1BJG5           | TRIM28      | Uncharacterized protein                         | 86.733  | 18.3                   | 13              | 16          | 5.8                    | 5               | 8           |
| A7MB36           | TRIM3       | TRIM3 protein                                   | 80.845  | 6.6                    | 4               | 4           | 1.5                    | 1               | 1           |
| Q0VCP5           | TRIM32      | Tripartite motif-containing 32                  | 71.87   | 11.5                   | 7               | 11          | 9.6                    | 6               | 10          |
| F1MNE1           | TRIM33      | Uncharacterized protein                         | 122.55  | 4.4                    | 4               | 4           | 1.7                    | 2               | 4           |
| E1BAW5           | TRIM36      | Uncharacterized protein                         | 82.94   | 1.2                    | 1               | 2           | #N/A                   | #N/A            | #N/A        |
| E1BJS7           | TRIM71      | E3 ubiquitin-protein ligase TRIM71              | 93.191  | 4.8                    | 4               | 5           | 5                      | 4               | 4           |
| E1B7Q7           | TRIP12      | E3 ubiquitin-protein ligase TRIP12              | 220.39  | 5.2                    | 9               | 14          | 0.8                    | 2               | 2           |
| F1N3B9           | TRIP13      | Uncharacterized protein                         | 48.649  | 2.8                    | 1               | 1           | 2.8                    | 1               | 1           |
| Q2KIA2           | TRMT112     | tRNA methyltransferase 112 homolog              | 14.319  | 52.8                   | 6               | 13          | #N/A                   | #N/A            | #N/A        |
| Q1RML6           | TRNT1       | Uncharacterized protein                         | 49.779  | 41.9                   | 17              | 32          | 15.7                   | 8               | 18          |
| F1MM99           | TSC1        | Uncharacterized protein                         | 128.59  | 7.5                    | 7               | 8           | 6.7                    | 8               | 14          |
| E1BNT2           | TSC2        | Uncharacterized protein (Fragment)              | 201.37  | 2.4                    | 4               | 5           | 4.6                    | 8               | 9           |
| E1BCC2           | TSC22D2     | Uncharacterized protein                         | 77.707  | #N/A                   | #N/A            | #N/A        | 1.2                    | 1               | 2           |
| P43896           | TSMF        | Elongation factor Ts, mitochondrial             | 36.602  | 43.2                   | 12              | 24          | 29.6                   | 10              | 27          |
| A3KN51           | TSG101      | TSG101 protein                                  | 44.055  | 32.7                   | 12              | 27          | 18.9                   | 8               | 22          |
| Q08DM8           | TSN         | Translin                                        | 26.169  | 54.8                   | 13              | 42          | 26.8                   | 7               | 18          |
| G3MY03           | TSNAX       | Uncharacterized protein                         | 33.049  | 49.7                   | 10              | 22          | 8.6                    | 3               | 6           |
| Q2KJ41           | TSPAN14     | Tetraspanin 14                                  | 30.723  | 3.7                    | 1               | 2           | #N/A                   | #N/A            | #N/A        |
| Q3SYV5           | TSPAN33     | Tetraspanin-33                                  | 31.574  | #N/A                   | #N/A            | #N/A        | 3.2                    | 1               | 1           |

| Accession number | Gene symbol | Discription                                  | MW(kDa) | Biological Replicate 1 |                 |             | Biological Replicate 2 |                 |             |
|------------------|-------------|----------------------------------------------|---------|------------------------|-----------------|-------------|------------------------|-----------------|-------------|
|                  |             |                                              |         | Sequence coverage(%)   | Unique peptides | MS/MS count | Sequence coverage(%)   | Unique peptides | MS/MS count |
| Q32KU6           | TSPAN6      | Tetraspanin-6                                | 27.524  | 9.4                    | 2               | 4           | 4.5                    | 2               | 3           |
| Q148J1           | TSPAN7      | Tetraspanin 7                                | 27.554  | 9.6                    | 2               | 5           | 9.6                    | 2               | 5           |
| Q3T090           | TSR2        | Pre-rRNA-processing protein TSR2             | 20.789  | 12.1                   | 2               | 2           | 8.9                    | 2               | 5           |
| G3N094           | TSSC1       | Uncharacterized protein                      | 43.217  | 26.1                   | 7               | 11          | 10.1                   | 4               | 9           |
| P00586           | TST         | Thiosulfate sulfurtransferase                | 33.295  | 8.1                    | 2               | 2           | 9.8                    | 3               | 3           |
| Q2KIT8           | TSTA3       | Tissue specific transplantation antigen P35B | 36.026  | 36.4                   | 13              | 38          | 16.5                   | 5               | 9           |
| F1MW03           | TSTD1       | Uncharacterized protein                      | 12.562  | 31.6                   | 4               | 10          | 26.3                   | 4               | 9           |
| Q3ZBR5           | TTC1        | Tetratricopeptide repeat protein 1           | 33.596  | 7.2                    | 2               | 2           | 12.7                   | 4               | 5           |
| F1MZZ3           | TTC15       | Uncharacterized protein                      | 85.014  | 24.8                   | 15              | 24          | 13.9                   | 11              | 23          |
| F1MEM9           | TTC19       | Uncharacterized protein                      | 40.417  | 14                     | 4               | 7           | 9.6                    | 4               | 6           |
| E1B885           | TTC37       | Uncharacterized protein                      | 174.66  | 7.5                    | 10              | 13          | 3.1                    | 6               | 8           |
| F1MNU0           | TTC39A      | Uncharacterized protein                      | 65.577  | #N/A                   | #N/A            | #N/A        | 1.6                    | 1               | 1           |
| Q5EA11           | TTC4        | Tetratricopeptide repeat protein 4           | 44.372  | 12.1                   | 5               | 10          | 4.4                    | 2               | 5           |
| E1BPP1           | TTK         | Uncharacterized protein (Fragment)           | 89.274  | 2.5                    | 2               | 2           | #N/A                   | #N/A            | #N/A        |
| P38584           | TTL         | Tubulin--tyrosine ligase                     | 43.27   | 2.4                    | 1               | 1           | #N/A                   | #N/A            | #N/A        |
| F1N5K2           | TLL12       | Uncharacterized protein                      | 75.492  | 44.1                   | 21              | 55          | 11                     | 6               | 10          |
| F1N757           | TTN         | Uncharacterized protein                      | 3813.9  | 0.1                    | 2               | 2           | 0.1                    | 4               | 6           |
| O46375           | TTR         | Transthyretin                                | 15.727  | 51                     | 4               | 11          | 19.7                   | 2               | 9           |
| F1N1D4           | TTYH3       | Protein tweety homolog                       | 57.753  | 2.1                    | 1               | 1           | #N/A                   | #N/A            | #N/A        |
| F2Z4C1           | TUBA1A      | Uncharacterized protein                      | 50.135  | 63                     | 0               | 5           | #N/A                   | #N/A            | #N/A        |
| P81947           | TUBA1B      | Tubulin alpha-1B chain                       | 50.151  | 63                     | 1               | 8           | 38.1                   | 1               | 8           |
| Q3ZCJ7           | TUBA1C      | Tubulin alpha-1C chain                       | 49.857  | 70.6                   | 1               | 10          | #N/A                   | #N/A            | #N/A        |
| Q2HJ86           | TUBA1D      | Tubulin alpha-1D chain                       | 50.282  | 57.7                   | 1               | 5           | 40                     | 1               | 75          |
| E1BJB1           | TUBB2B      | Tubulin beta-2B chain                        | 49.906  | 70.3                   | 6               | 216         | 36.2                   | 2               | 24          |
| Q2T9S0           | TUBB3       | Tubulin beta-3 chain                         | 50.432  | 56.7                   | 7               | 29          | 39.6                   | 4               | 22          |
| Q3MHM5           | TUBB4B      | Tubulin beta-4B chain                        | 49.83   | 74.2                   | 4               | 61          | 40                     | 3               | 107         |
| Q2KJDO           | TUBB5       | Tubulin beta-5 chain                         | 49.67   | 70.5                   | 4               | 24          | 36.3                   | 2               | 10          |
| A6QNT3           | TUBE1       | TUBE1 protein                                | 40.753  | 3.3                    | 1               | 1           | #N/A                   | #N/A            | #N/A        |
| Q32KM1           | TUBG2       | Tubulin gamma-2 chain                        | 51.064  | 39.5                   | 16              | 27          | 11.8                   | 6               | 15          |
| A5D7P5           | TUBGCP2     | TUBGCP2 protein                              | 102.75  | 18.3                   | 14              | 28          | 7.6                    | 8               | 15          |
| E1BNG7           | TUBGCP3     | Uncharacterized protein                      | 103.12  | 17.1                   | 13              | 19          | 5.4                    | 5               | 7           |



| Accession number | Gene symbol | Discription                                      | MW(kDa) | Biological Replicate 1 |                 |             | Biological Replicate 2 |                 |             |
|------------------|-------------|--------------------------------------------------|---------|------------------------|-----------------|-------------|------------------------|-----------------|-------------|
|                  |             |                                                  |         | Sequence coverage(%)   | Unique peptides | MS/MS count | Sequence coverage(%)   | Unique peptides | MS/MS count |
| A0JNH5           | TUBGCP4     | Tubulin, gamma complex associated protein 4      | 75.932  | 9.6                    | 5               | 6           | 5                      | 4               | 5           |
| P49410           | TUFM        | Elongation factor Tu, mitochondrial              | 49.398  | 59.3                   | 23              | 88          | 29.2                   | 12              | 58          |
| F1N7S0           | TULP3       | Uncharacterized protein                          | 52.905  | 2.9                    | 2               | 3           | #N/A                   | #N/A            | #N/A        |
| E1BD72           | TUSC2       | Uncharacterized protein                          | 12.132  | 51.8                   | 4               | 17          | #N/A                   | #N/A            | #N/A        |
| Q29S14           | TVP23B      | Golgi apparatus membrane protein TVP23 homolog B | 23.667  | 9.1                    | 3               | 4           | #N/A                   | #N/A            | #N/A        |
| Q56JV6           | TWF1        | Twinfilin-1                                      | 40.248  | 43.4                   | 11              | 26          | 19.1                   | 8               | 11          |
| A2VDX0           | TWF2        | TWF2 protein                                     | 39.564  | 10                     | 1               | 1           | #N/A                   | #N/A            | #N/A        |
| E1BGS4           | TXLNA       | Uncharacterized protein                          | 63.288  | 6.1                    | 3               | 3           | #N/A                   | #N/A            | #N/A        |
| G3X6A9           | TXLNG       | Uncharacterized protein                          | 58.605  | 3.5                    | 1               | 1           | 1.8                    | 1               | 1           |
| G8JKZ8           | TXN         | Thioredoxin (Fragment)                           | 10.868  | 55.7                   | 6               | 13          | 32                     | 3               | 6           |
| Q5E936           | TXNDC12     | Thioredoxin domain-containing                    | 19.222  | 23.3                   | 4               | 6           | 27.3                   | 5               | 7           |
| F1MHF7           | TXNDC17     | Uncharacterized protein                          | 13.941  | 15.4                   | 2               | 5           | #N/A                   | #N/A            | #N/A        |
| F1MKS3           | TXNDC5      | Uncharacterized protein (Fragment)               | 28.673  | 37.4                   | 8               | 20          | 13.6                   | 5               | 12          |
| F1MYQ1           | TXNDC9      | Thioredoxin domain-containing                    | 26.488  | 15.5                   | 4               | 4           | 11.1                   | 3               | 5           |
| F1MLV3           | TXNL1       | Uncharacterized protein                          | 32.281  | 51.2                   | 10              | 19          | 20.4                   | 4               | 7           |
| G1K1Q2           | TXNRD1      | Thioredoxin reductase 1,                         | 54.563  | 2.4                    | 1               | 1           | #N/A                   | #N/A            | #N/A        |
| Q9N2I8           | TXNRD2      | Thioredoxin reductase 2,                         | 54.669  | 15.5                   | 6               | 13          | 11.4                   | 5               | 9           |
| F1MBL2           | TXNRD3      | Uncharacterized protein (Fragment)               | 62.65   | 8.3                    | 5               | 6           | 4.9                    | 3               | 5           |
| Q2TA32           | TYMS        | Thymidylate synthase                             | 39.785  | 9.6                    | 3               | 3           | 3.1                    | 1               | 1           |
| A1A4K8           | U2AF1       | Splicing factor U2AF 35 kDa subunit              | 27.701  | 3.4                    | 1               | 1           | #N/A                   | #N/A            | #N/A        |
| Q24JZ8           | U2AF2       | U2 small nuclear RNA auxiliary                   | 53.486  | 1.7                    | 1               | 1           | #N/A                   | #N/A            | #N/A        |
| G3N337           | UAP1L1      | Uncharacterized protein (Fragment)               | 56.711  | 14.5                   | 6               | 11          | 4.7                    | 2               | 7           |
| A3KMV5           | UBA1        | Ubiquitin-like modifier-activating enzyme 1      | 117.83  | 56.4                   | 49              | 167         | 31.7                   | 29              | 112         |
| A4FV12           | UBA2        | UBA2 protein                                     | 71.031  | 1.4                    | 1               | 1           | 1.4                    | 1               | 2           |
| Q0P5I7           | UBA3        | Ubiquitin-like modifier activating enzyme 2      | 51.804  | 5.8                    | 3               | 3           | 5.6                    | 3               | 3           |
| A7MAZ3           | UBA5        | Ubiquitin-like modifier-activating               | 44.696  | 24.3                   | 6               | 12          | 2.7                    | 1               | 1           |
| P63048           | UBA52       | Ubiquitin-60S ribosomal protein L40              | 14.728  | #N/A                   | #N/A            | #N/A        | 36.7                   | 5               | 76          |
| F1ME38           | UBA6        | Uncharacterized protein                          | 118.79  | 40.8                   | 37              | 75          | 14.5                   | 16              | 40          |
| Q0VBZ2           | UBAC1       | UBA domain containing 1                          | 45.088  | 5.2                    | 2               | 2           | #N/A                   | #N/A            | #N/A        |
| A6QR26           | UBAP1       | UBAP1 protein                                    | 54.99   | 7.4                    | 2               | 2           | #N/A                   | #N/A            | #N/A        |

| Accession number | Gene symbol | Discription                                        | MW(kDa) | Biological Replicate 1 |                 |             | Biological Replicate 2 |                 |             |
|------------------|-------------|----------------------------------------------------|---------|------------------------|-----------------|-------------|------------------------|-----------------|-------------|
|                  |             |                                                    |         | Sequence coverage(%)   | Unique peptides | MS/MS count | Sequence coverage(%)   | Unique peptides | MS/MS count |
| E1BA82           | UBAP2       | Uncharacterized protein                            | 119.55  | 4.4                    | 4               | 6           | 2.1                    | 2               | 4           |
| A6QLT5           | UBAP2L      | UBAP2L protein                                     | 103.95  | 12.7                   | 9               | 16          | 4.2                    | 4               | 6           |
| F1MY9            | UBASH3A     | Uncharacterized protein                            | 70.154  | 9.1                    | 6               | 9           | 7.7                    | 5               | 6           |
| F1MTZ3           | UBASH3B     | Uncharacterized protein (Fragment)                 | 66.702  | 2                      | 1               | 2           | #N/A                   | #N/A            | #N/A        |
| POCG53           | UBB         | Polyubiquitin-B                                    | 34.308  | 84.3                   | 1               | 1           | #N/A                   | #N/A            | #N/A        |
| Q32PA5           | UBE2C       | Ubiquitin-conjugating enzyme E2 C                  | 19.608  | 30.7                   | 4               | 8           | #N/A                   | #N/A            | #N/A        |
| Q1RMX2           | UBE2D2      | Ubiquitin-conjugating enzyme E2 D2                 | 16.735  | 44.9                   | 1               | 17          | 32.7                   | 1               | 2           |
| Q3ZCF7           | UBE2D3      | Ubiquitin-conjugating enzyme E2 D3                 | 16.745  | 34.7                   | 1               | 3           | 34.7                   | 2               | 18          |
| G3N2X5           | UBE2E2      | Uncharacterized protein (Fragment)                 | 14.145  | 6.3                    | 1               | 2           | 15.1                   | 2               | 3           |
| Q1RMW1           | UBE2F       | NEDD8-conjugating enzyme UBE2F                     | 21.133  | 7                      | 1               | 2           | #N/A                   | #N/A            | #N/A        |
| A2VE20           | UBE2G1      | UBE2G1 protein                                     | 19.509  | 7.1                    | 1               | 2           | #N/A                   | #N/A            | #N/A        |
| Q32LN1           | UBE2H       | Ubiquitin-conjugating enzyme E2 H                  | 20.655  | 13.1                   | 2               | 2           | #N/A                   | #N/A            | #N/A        |
| A6H744           | UBE2I       | SUMO-conjugating enzyme UBC9                       | 18.007  | 22.8                   | 4               | 6           | #N/A                   | #N/A            | #N/A        |
| P61085           | UBE2K       | Ubiquitin-conjugating enzyme E2 K                  | 22.406  | 49                     | 8               | 13          | 17.5                   | 3               | 8           |
| F1MC72           | UBE2L3      | Ubiquitin-conjugating enzyme E2 L3 (Fragment)      | 16.944  | 67.1                   | 6               | 23          | 30.1                   | 5               | 12          |
| A3KN22           | UBE2M       | NEDD8-conjugating enzyme Ubc12                     | 20.9    | 45.4                   | 9               | 10          | 22.4                   | 5               | 5           |
| QOP5K3           | UBE2N       | Ubiquitin-conjugating enzyme E2 N                  | 17.138  | 59.2                   | 8               | 22          | 30.3                   | 5               | 19          |
| F1N3I3           | UBE2O       | Uncharacterized protein                            | 140.39  | 10.3                   | 12              | 18          | 2.6                    | 4               | 5           |
| E1BIE5           | UBE2Q1      | Uncharacterized protein                            | 46.126  | 29.4                   | 10              | 15          | 9.7                    | 5               | 9           |
| E1BAB9           | UBE2R2      | Uncharacterized protein                            | 25.732  | 14.2                   | 3               | 5           | #N/A                   | #N/A            | #N/A        |
| Q3SZ52           | UBE2V1      | Ubiquitin-conjugating enzyme E2                    | 16.495  | 49.7                   | 2               | 18          | 15.6                   | 1               | 10          |
| Q3SZ43           | UBE2V2      | Ubiquitin-conjugating enzyme E2                    | 16.363  | 53.8                   | 2               | 3           | #N/A                   | #N/A            | #N/A        |
| F1N1X8           | UBE2Z       | Uncharacterized protein                            | 38.412  | 19.7                   | 7               | 16          | 9.3                    | 4               | 9           |
| A4IFN7           | UBE3A       | UBE3A protein                                      | 100.36  | 9.8                    | 9               | 13          | 7.9                    | 7               | 14          |
| E1BCU1           | UBE3B       | Uncharacterized protein                            | 122.96  | 10.8                   | 12              | 16          | 5.1                    | 6               | 6           |
| F1N703           | UBE3C       | Uncharacterized protein                            | 123.38  | 3.3                    | 3               | 4           | #N/A                   | #N/A            | #N/A        |
| G3MZF7           | UBFD1       | Uncharacterized protein                            | 33.038  | 20.9                   | 4               | 24          | 13.1                   | 3               | 6           |
| Q3SZ34           | UBL4A       | Ubiquitin-like 4A                                  | 21.699  | 27.7                   | 5               | 8           | 24.6                   | 5               | 9           |
| Q3T0Z3           | UBL5        | Ubiquitin-like protein 5                           | 8.5468  | 12.3                   | 1               | 1           | #N/A                   | #N/A            | #N/A        |
| Q2KJD7           | UBLCP1      | Ubiquitin-like domain-containing CTD phosphatase 1 | 36.804  | 7.5                    | 2               | 2           | #N/A                   | #N/A            | #N/A        |

| Accession number | Gene symbol | Discription                                      | MW(kDa) | Biological Replicate 1 |                 |             | Biological Replicate 2 |                 |             |
|------------------|-------------|--------------------------------------------------|---------|------------------------|-----------------|-------------|------------------------|-----------------|-------------|
|                  |             |                                                  |         | Sequence coverage(%)   | Unique peptides | MS/MS count | Sequence coverage(%)   | Unique peptides | MS/MS count |
| F1N1A3           | UBQLN1      | Uncharacterized protein                          | 62.412  | 15.6                   | 6               | 10          | 4.9                    | 2               | 3           |
| E1BIW0           | UBR1        | Uncharacterized protein                          | 199.46  | 2.8                    | 4               | 6           | #N/A                   | #N/A            | #N/A        |
| E1BCW1           | UBR2        | Uncharacterized protein                          | 200.52  | 3.6                    | 7               | 9           | 1.9                    | 4               | 4           |
| F1MQK6           | UBR3        | Uncharacterized protein (Fragment)               | 213.48  | 0.5                    | 1               | 1           | #N/A                   | #N/A            | #N/A        |
| E1BHT5           | UBR4        | Uncharacterized protein                          | 572.59  | 0.2                    | 1               | 1           | #N/A                   | #N/A            | #N/A        |
| A3KMX6           | UBR7        | UBR7 protein                                     | 48.222  | 16.9                   | 5               | 6           | #N/A                   | #N/A            | #N/A        |
| Q3ZBU9           | UBXN4       | UBX domain-containing protein 4                  | 56.784  | 3.3                    | 1               | 2           | 3.1                    | 2               | 2           |
| Q2KIJ6           | UBXN6       | UBX domain-containing protein 6                  | 49.732  | 14.5                   | 6               | 8           | 7.3                    | 4               | 7           |
| F1MUA8           | UBXN7       | Uncharacterized protein (Fragment)               | 53.668  | 4.2                    | 2               | 3           | #N/A                   | #N/A            | #N/A        |
| P23356           | UCHL1       | Ubiquitin carboxyl-terminal hydrolase isozyme L1 | 28.335  | 67.5                   | 18              | 229         | 54                     | 15              | 120         |
| Q2TBG8           | UCHL3       | Ubiquitin carboxyl-terminal hydrolase isozyme L3 | 26.181  | 60                     | 12              | 37          | 43.9                   | 8               | 18          |
| Q9XSJ0           | UCHL5       | Ubiquitin carboxyl-terminal hydrolase isozyme L5 | 37.431  | 5.2                    | 1               | 2           | #N/A                   | #N/A            | #N/A        |
| Q0P5A4           | UCK1        | Uridine-cytidine kinase 1                        | 31.195  | 6.9                    | 2               | 3           | #N/A                   | #N/A            | #N/A        |
| E1BP85           | UCKL1       | Uridine-cytidine kinase                          | 60.866  | 7.3                    | 4               | 5           | #N/A                   | #N/A            | #N/A        |
| A5PJF9           | UEVLD       | UEVLD protein                                    | 52.237  | 3.2                    | 2               | 2           | #N/A                   | #N/A            | #N/A        |
| Q5E953           | UFC1        | Ubiquitin-fold modifier-conjugating enzyme 1     | 19.431  | 32.3                   | 6               | 8           | #N/A                   | #N/A            | #N/A        |
| Q0P568           | UFD1L       | Ubiquitin fusion degradation 1 like              | 26.071  | 23.8                   | 4               | 10          | 10                     | 2               | 5           |
| A1A4I9           | UFL1        | E3 UFM1-protein ligase 1                         | 89.382  | 15.8                   | 11              | 14          | 8.6                    | 6               | 12          |
| Q2KJG2           | UFM1        | Ubiquitin-fold modifier 1                        | 9.1675  | 35.3                   | 3               | 6           | #N/A                   | #N/A            | #N/A        |
| E1BK69           | UFSP2       | Uncharacterized protein                          | 53.136  | 9.8                    | 4               | 5           | #N/A                   | #N/A            | #N/A        |
| E1B9R3           | UGGT1       | Uncharacterized protein                          | 177.69  | 15                     | 19              | 23          | 6.2                    | 9               | 16          |
| F1MSL9           | UGGT2       | Uncharacterized protein (Fragment)               | 174.79  | 29.2                   | 43              | 93          | 15.7                   | 25              | 75          |
| Q07130           | UGP2        | UTP--glucose-1-phosphate uridylyltransferase     | 56.903  | 60                     | 30              | 96          | 39.4                   | 21              | 84          |
| Q1LZI1           | UGT3A1      | UDP-glucuronosyltransferase 3A1                  | 59.681  | 1.9                    | 1               | 1           | #N/A                   | #N/A            | #N/A        |
| A7E320           | UHRF1       | E3 ubiquitin-protein ligase UHRF1                | 88.338  | 26.2                   | 17              | 32          | 14.8                   | 9               | 12          |
| F1MFX7           | UHRF2       | Uncharacterized protein (Fragment)               | 83.881  | 54                     | 31              | 161         | 41.2                   | 26              | 122         |
| F1N332           | ULK3        | Uncharacterized protein                          | 53.351  | 7.6                    | 3               | 3           | 2.1                    | 1               | 2           |

| Accession number | Gene symbol | Discription                                                | MW(kDa) | Biological Replicate 1 |                 |             | Biological Replicate 2 |                 |             |
|------------------|-------------|------------------------------------------------------------|---------|------------------------|-----------------|-------------|------------------------|-----------------|-------------|
|                  |             |                                                            |         | Sequence coverage(%)   | Unique peptides | MS/MS count | Sequence coverage(%)   | Unique peptides | MS/MS count |
| P31754           | UMPS        | Uridine 5-monophosphate synthase                           | 52.229  | 9.2                    | 4               | 4           | 2.5                    | 1               | 1           |
| Q3SYR2           | UNC119      | Protein unc-119 homolog A                                  | 26.987  | 3.8                    | 1               | 1           | #N/A                   | #N/A            | #N/A        |
| F1MP30           | UNC13B      | Uncharacterized protein                                    | 180.73  | 2.4                    | 3               | 4           | 1.2                    | 2               | 2           |
| A5PKJ5           | UNC45A      | UNC45A protein                                             | 101.87  | 9.4                    | 8               | 9           | 1.9                    | 2               | 2           |
| E1BEK9           | UPF1        | Uncharacterized protein                                    | 124.28  | 14.6                   | 14              | 18          | 3.1                    | 5               | 7           |
| Q2T9M5           | UPF3B       | UPF3 regulator of nonsense transcripts homolog B (Yeast)   | 36.349  | #N/A                   | #N/A            | #N/A        | 2.9                    | 1               | 1           |
| Q32LA4           | UPRT        | Uracil phosphoribosyltransferase                           | 33.354  | 8.8                    | 3               | 3           | #N/A                   | #N/A            | #N/A        |
| F6RX10           | UQCC        | Uncharacterized protein                                    | 34.031  | 11.8                   | 4               | 6           | #N/A                   | #N/A            | #N/A        |
| Q3SZ13           | UQCC2       | Ubiquinol-cytochrome-c reductase complex assembly factor 2 | 15.975  | 20.6                   | 3               | 3           | #N/A                   | #N/A            | #N/A        |
| P00129           | UQCRB       | Cytochrome b-c1 complex subunit 7                          | 13.476  | 29.7                   | 4               | 6           | 30.6                   | 4               | 11          |
| P31800           | UQCRC1      | Cytochrome b-c1 complex subunit 1, mitochondrial           | 52.735  | 46                     | 18              | 65          | 34.2                   | 14              | 39          |
| P23004           | UQCRC2      | Cytochrome b-c1 complex subunit 2, mitochondrial           | 48.148  | 57.4                   | 20              | 62          | 26                     | 12              | 46          |
| G3MXD1           | UQCRFS1     | Cytochrome b-c1 complex subunit Rieske, mitochondrial      | 29.92   | 27.7                   | 7               | 28          | 16.6                   | 5               | 12          |
| P13271           | UQCRQ       | Cytochrome b-c1 complex subunit 8                          | 9.7201  | 42.7                   | 4               | 9           | 42.7                   | 4               | 11          |
| E1BEX4           | UROD        | Uroporphyrinogen decarboxylase                             | 40.811  | 17.2                   | 6               | 9           | 5.7                    | 2               | 2           |
| Q148D2           | USE1        | Uncharacterized protein                                    | 29.463  | 11.9                   | 3               | 4           | #N/A                   | #N/A            | #N/A        |
| P41541           | US01        | General vesicular transport factor                         | 107.51  | 27.5                   | 25              | 59          | 15.3                   | 15              | 29          |
| A1L506           | USP11       | Ubiquitin carboxyl-terminal                                | 86.426  | 2.8                    | 1               | 1           | #N/A                   | #N/A            | #N/A        |
| Q0IIF7           | USP14       | Ubiquitin carboxyl-terminal                                | 56.012  | 13.6                   | 6               | 8           | #N/A                   | #N/A            | #N/A        |
| Q2HJE4           | USP15       | Ubiquitin carboxyl-terminal                                | 109.44  | 17.5                   | 14              | 26          | 10                     | 9               | 17          |
| F1MUD4           | USP19       | Ubiquitin carboxyl-terminal hydrolase (Fragment)           | 157.69  | 3.1                    | 4               | 6           | 0.8                    | 1               | 1           |
| E1BDG7           | USP28       | Ubiquitin carboxyl-terminal                                | 122.73  | 2.2                    | 2               | 2           | #N/A                   | #N/A            | #N/A        |
| A6QNM7           | USP33       | Ubiquitin carboxyl-terminal                                | 103.32  | 3.1                    | 2               | 5           | #N/A                   | #N/A            | #N/A        |
| F1N0A8           | USP34       | Ubiquitin carboxyl-terminal hydrolase (Fragment)           | 404.3   | #N/A                   | #N/A            | #N/A        | 0.2                    | 1               | 1           |
| E1BG52           | USP35       | Ubiquitin carboxyl-terminal                                | 113.13  | 2.1                    | 2               | 2           | #N/A                   | #N/A            | #N/A        |

| Accession number | Gene symbol | Discription                                              | MW(kDa) | Biological Replicate 1 |                 |             | Biological Replicate 2 |                 |             |
|------------------|-------------|----------------------------------------------------------|---------|------------------------|-----------------|-------------|------------------------|-----------------|-------------|
|                  |             |                                                          |         | Sequence coverage(%)   | Unique peptides | MS/MS count | Sequence coverage(%)   | Unique peptides | MS/MS count |
| A6QR55           | USP4        | Ubiquitin carboxyl-terminal                              | 108.51  | 8.8                    | 5               | 7           | #N/A                   | #N/A            | #N/A        |
| F1N1Z2           | USP47       | Ubiquitin carboxyl-terminal hydrolase (Fragment)         | 157.58  | 6.8                    | 10              | 16          | 2.2                    | 3               | 5           |
| F1N3P2           | USP5        | Ubiquitin carboxyl-terminal                              | 95.814  | 37.9                   | 25              | 73          | 15.9                   | 12              | 36          |
| F1N556           | USP7        | Ubiquitin carboxyl-terminal hydrolase (Fragment)         | 126.54  | 21                     | 20              | 29          | 7.7                    | 9               | 16          |
| Q0IIM6           | USP8        | Ubiquitin carboxyl-terminal                              | 124.24  | 11.4                   | 12              | 17          | 3.8                    | 5               | 8           |
| G5E630           | USP9X       | Ubiquitin carboxyl-terminal                              | 290.3   | 1.5                    | 4               | 4           | 2.6                    | 7               | 9           |
| E1BMI4           | UXS1        | Uncharacterized protein                                  | 47.747  | 8.1                    | 3               | 3           | #N/A                   | #N/A            | #N/A        |
| Q32P97           | UXT         | Protein UXT                                              | 18.083  | #N/A                   | #N/A            | #N/A        | 5.1                    | 1               | 2           |
| F1MJZ1           | VAC14       | Protein VAC14 homolog                                    | 87.828  | #N/A                   | #N/A            | #N/A        | 1.3                    | 1               | 2           |
| G3X752           | VAMP3       | Vesicle-associated membrane protein 3 (Fragment)         | 11.404  | 38.8                   | 4               | 8           | 23.3                   | 2               | 4           |
| Q17QI5           | VAMP7       | Vesicle-associated membrane protein                      | 24.962  | 50.5                   | 11              | 27          | 25.5                   | 6               | 15          |
| Q0VCY1           | VAPA        | Vesicle-associated membrane protein-associated protein A | 27.856  | 20.9                   | 7               | 13          | 21.3                   | 4               | 9           |
| A2VDZ9           | VAPB        | Vesicle-associated membrane protein-associated protein B | 27.158  | 53.5                   | 13              | 53          | 36.6                   | 9               | 57          |
| E1BLV6           | VARS        | Uncharacterized protein (Fragment)                       | 112     | 22.7                   | 22              | 60          | 16.9                   | 16              | 36          |
| F1N6L1           | VARS2       | Uncharacterized protein (Fragment)                       | 121.76  | 3.4                    | 2               | 5           | #N/A                   | #N/A            | #N/A        |
| Q2TA49           | VASP        | Vasodilator-stimulated                                   | 40.463  | 12.8                   | 4               | 6           | 9.7                    | 3               | 3           |
| F1MUP9           | VAT1        | Uncharacterized protein                                  | 42.84   | 38.1                   | 13              | 48          | 17.4                   | 7               | 21          |
| Q2TBX2           | VBP1        | Prefoldin subunit 3                                      | 22.482  | 51.3                   | 11              | 33          | 50.8                   | 11              | 27          |
| F1N789           | VCL         | Uncharacterized protein                                  | 123.86  | 37.7                   | 37              | 66          | 21.4                   | 26              | 39          |
| Q3ZBT1           | VCP         | Transitional endoplasmic reticulum                       | 89.329  | 58.8                   | 43              | 166         | 36.7                   | 28              | 121         |
| E1BCH9           | VCPIP1      | Uncharacterized protein                                  | 134.61  | 13.3                   | 12              | 18          | 8.4                    | 9               | 12          |
| P45879           | VDAC1       | Voltage-dependent anion-selective channel protein 1      | 30.74   | 72.1                   | 16              | 55          | 39.6                   | 10              | 79          |
| P68002           | VDAC2       | Voltage-dependent anion-selective channel protein 2      | 31.619  | 62.6                   | 14              | 50          | 26.9                   | 8               | 51          |
| Q9MZ13           | VDAC3       | Voltage-dependent anion-selective channel protein 3      | 30.738  | 60.8                   | 15              | 84          | 43.1                   | 11              | 75          |

| Accession number | Gene symbol | Discription                                               | MW(kDa) | Biological Replicate 1 |                 |             | Biological Replicate 2 |                 |             |
|------------------|-------------|-----------------------------------------------------------|---------|------------------------|-----------------|-------------|------------------------|-----------------|-------------|
|                  |             |                                                           |         | Sequence coverage(%)   | Unique peptides | MS/MS count | Sequence coverage(%)   | Unique peptides | MS/MS count |
| P48616           | VIM         | Vimentin                                                  | 53.727  | 54.1                   | 27              | 63          | 45.1                   | 20              | 50          |
| Q6B4J2           | VKORC1      | Vitamin K epoxide reductase complex subunit 1             | 17.967  | 16                     | 3               | 10          | 19.6                   | 3               | 8           |
| G3MZM8           | VKORC1L1    | Uncharacterized protein (Fragment)                        | 12.528  | 18                     | 2               | 5           | 8.1                    | 1               | 2           |
| F1MIQ2           | VLDLR       | Uncharacterized protein                                   | 93.121  | #N/A                   | #N/A            | #N/A        | 1.3                    | 1               | 1           |
| Q0VCK9           | VMP1        | Vacuole membrane protein 1                                | 46.182  | #N/A                   | #N/A            | #N/A        | 2.2                    | 1               | 1           |
| F1N5Q5           | VPS11       | Uncharacterized protein                                   | 107.6   | 2                      | 2               | 2           | 4                      | 4               | 5           |
| Q5E9L7           | VPS16       | Vacuolar protein sorting-associated protein 16 homolog    | 94.701  | 9.1                    | 6               | 6           | 1.8                    | 1               | 1           |
| A6QR33           | VPS18       | Uncharacterized protein                                   | 110.07  | 6.5                    | 7               | 7           | 0.8                    | 1               | 2           |
| Q5E9A6           | VPS25       | Vacuolar protein-sorting-associated protein 25            | 20.746  | 27.8                   | 4               | 7           | 11.4                   | 2               | 2           |
| Q0VD53           | VPS26A      | Vacuolar protein sorting-associated protein 26A           | 38.155  | 36.1                   | 8               | 16          | 17.4                   | 4               | 12          |
| E1BMM4           | VPS26B      | Uncharacterized protein (Fragment)                        | 38.834  | 23.5                   | 6               | 6           | 5.4                    | 1               | 1           |
| Q3T178           | VPS28       | Vacuolar protein sorting-associated protein 28 homolog    | 25.484  | 44.8                   | 8               | 11          | 17.6                   | 3               | 6           |
| G3X6P5           | VPS29       | Vacuolar protein sorting-associated protein 29 (Fragment) | 20.786  | 32.4                   | 6               | 15          | 21.6                   | 4               | 22          |
| F1MT37           | VPS33A      | Uncharacterized protein                                   | 67.506  | 13.1                   | 7               | 7           | 3.2                    | 2               | 2           |
| Q2HJG5           | VPS35       | Vacuolar protein sorting-associated protein 35            | 91.75   | 41.5                   | 30              | 80          | 22.2                   | 17              | 45          |
| F1MT69           | VPS36       | Vacuolar protein-sorting-associated protein 36            | 43.758  | 11.9                   | 4               | 4           | #N/A                   | #N/A            | #N/A        |
| Q29RR7           | VPS37A      | Uncharacterized protein                                   | 44.249  | 14.9                   | 4               | 6           | 10.6                   | 3               | 3           |
| E1BC70           | VPS37C      | Uncharacterized protein                                   | 38.07   | 4.3                    | 1               | 1           | 4.3                    | 1               | 2           |
| E1BM41           | VPS39       | Uncharacterized protein                                   | 100.62  | 3.4                    | 3               | 3           | 2.2                    | 2               | 2           |
| A3KN15           | VPS41       | Uncharacterized protein                                   | 98.583  | 1.2                    | 1               | 1           | #N/A                   | #N/A            | #N/A        |
| F1MDA6           | VPS45       | Uncharacterized protein                                   | 65.104  | 16.5                   | 10              | 17          | 5.4                    | 3               | 7           |
| F1MJ84           | VPS51       | Uncharacterized protein                                   | 77.832  | 13.5                   | 3               | 17          | 5.4                    | 4               | 5           |
| E1BDC9           | VPS52       | Uncharacterized protein                                   | 82.323  | 11.9                   | 8               | 10          | 4.6                    | 3               | 4           |
| E1BJW7           | VPS53       | Uncharacterized protein                                   | 94.446  | 9.1                    | 8               | 13          | 7.6                    | 7               | 12          |

| Accession number | Gene symbol | Discription                                                 | MW(kDa) | Biological Replicate 1 |                 |             | Biological Replicate 2 |                 |             |
|------------------|-------------|-------------------------------------------------------------|---------|------------------------|-----------------|-------------|------------------------|-----------------|-------------|
|                  |             |                                                             |         | Sequence coverage(%)   | Unique peptides | MS/MS count | Sequence coverage(%)   | Unique peptides | MS/MS count |
| Q32PI1           | VRK1        | Serine/threonine-protein kinase                             | 45.357  | 28                     | 10              | 16          | 7.1                    | 3               | 6           |
| Q32L63           | VTA1        | Vacuolar protein sorting-associated protein VTA1 homolog    | 34.016  | 39.4                   | 12              | 26          | 20.2                   | 6               | 23          |
| Q2KIU0           | VTI1B       | Vesicle transport through interaction with t-SNAREs homolog | 26.708  | 21.1                   | 4               | 6           | 17.2                   | 4               | 10          |
| E1BGC3           | WAPAL       | Uncharacterized protein                                     | 133.27  | 1.4                    | 1               | 1           | #N/A                   | #N/A            | #N/A        |
| P17248           | WARS        | Tryptophan--tRNA ligase,                                    | 53.811  | 47.5                   | 20              | 43          | 18.7                   | 9               | 25          |
| Q3T099           | WARS2       | Tryptophan--tRNA ligase,                                    | 40.204  | 13.1                   | 3               | 3           | 3.1                    | 1               | 2           |
| A2VDK6           | WASF2       | Wiskott-Aldrich syndrome protein family member 2            | 54.03   | 4.9                    | 2               | 2           | 1.6                    | 1               | 2           |
| A7Z063           | WASH1       | WAS protein family homolog 1                                | 50.772  | 16.8                   | 8               | 17          | 8.7                    | 5               | 10          |
| Q95107           | WASL        | Neural Wiskott-Aldrich syndrome                             | 54.671  | 13.3                   | 6               | 10          | 5.1                    | 4               | 4           |
| E1BNM6           | WBP11       | Uncharacterized protein                                     | 70.128  | 2.2                    | 1               | 3           | #N/A                   | #N/A            | #N/A        |
| E1BGX4           | WBP2        | Uncharacterized protein                                     | 37.241  | 21.7                   | 9               | 32          | 12                     | 6               | 22          |
| A7MBG9           | WBSCR1      | Eukaryotic translation initiation factor 4H                 | 24.472  | 25.2                   | 4               | 10          | 3.2                    | 1               | 2           |
| E1BIS5           | WBSCR16     | Uncharacterized protein                                     | 50.006  | 1.7                    | 1               | 2           | #N/A                   | #N/A            | #N/A        |
| Q2KIY3           | WDFY1       | WD repeat and FYVE domain-containing protein 1              | 46.28   | 5.1                    | 2               | 2           | #N/A                   | #N/A            | #N/A        |
| Q2KJH4           | WDR1        | WD repeat-containing protein 1                              | 66.257  | 68.2                   | 35              | 150         | 38                     | 24              | 93          |
| Q08D81           | WDR13       | Uncharacterized protein                                     | 53.684  | 2.3                    | 1               | 1           | #N/A                   | #N/A            | #N/A        |
| Q3SZD4           | WDR18       | WD repeat-containing protein 18                             | 47.611  | 13.7                   | 5               | 5           | 12.5                   | 5               | 6           |
| E1B7Q4           | WDR19       | Uncharacterized protein                                     | 151.77  | 1.3                    | 2               | 4           | #N/A                   | #N/A            | #N/A        |
| E1BDQ9           | WDR20       | Uncharacterized protein                                     | 62.435  | 3.7                    | 2               | 2           | #N/A                   | #N/A            | #N/A        |
| F1MJS7           | WDR24       | Uncharacterized protein                                     | 88.263  | 1.6                    | 1               | 1           | 3.9                    | 3               | 3           |
| Q2TBM8           | WDR26       | Uncharacterized protein                                     | 58.577  | 14.2                   | 5               | 5           | 1.9                    | 1               | 2           |
| E1BCT7           | WDR33       | Uncharacterized protein                                     | 145.86  | #N/A                   | #N/A            | #N/A        | 1.3                    | 2               | 3           |
| F1MTS5           | WDR34       | Uncharacterized protein                                     | 57.658  | 3                      | 2               | 2           | #N/A                   | #N/A            | #N/A        |
| Q9XSC3           | WDR44       | WD repeat-containing protein 44                             | 101.29  | 5.9                    | 5               | 8           | 2.4                    | 2               | 3           |
| E1BP79           | WDR47       | Uncharacterized protein                                     | 102.34  | 12.3                   | 9               | 17          | 4.7                    | 4               | 4           |
| Q32PG3           | WDR48       | WD repeat-containing protein 48                             | 76.192  | 6.1                    | 5               | 6           | 7.1                    | 4               | 4           |
| G3N1S7           | WDR52       | Uncharacterized protein (Fragment)                          | 115.08  | 0.6                    | 1               | 1           | #N/A                   | #N/A            | #N/A        |

| Accession number | Gene symbol | Discription                        | MW(kDa) | Biological Replicate 1 |                 |             | Biological Replicate 2 |                 |             |
|------------------|-------------|------------------------------------|---------|------------------------|-----------------|-------------|------------------------|-----------------|-------------|
|                  |             |                                    |         | Sequence coverage(%)   | Unique peptides | MS/MS count | Sequence coverage(%)   | Unique peptides | MS/MS count |
| A7MBJ6           | WDR59       | Uncharacterized protein            | 109.76  | 1.4                    | 1               | 1           | #N/A                   | #N/A            | #N/A        |
| Q32LN7           | WDR61       | WD repeat-containing protein 61    | 33.568  | 30.2                   | 5               | 11          | 12.5                   | 4               | 7           |
| Q32LBO           | WDR70       | WD repeat-containing protein 70    | 72.64   | 2.9                    | 2               | 2           | #N/A                   | #N/A            | #N/A        |
| G3MZF6           | WDR76       | Uncharacterized protein            | 70.41   | 1.9                    | 1               | 1           | #N/A                   | #N/A            | #N/A        |
| Q5E9I7           | WDR77       | Methylosome protein 50             | 36.789  | 29.2                   | 7               | 18          | 11.4                   | 3               | 9           |
| A7Z049           | WDR81       | Uncharacterized protein            | 96.132  | #N/A                   | #N/A            | #N/A        | 1.2                    | 1               | 2           |
| Q2HJE1           | WDR91       | WD repeat-containing protein 91    | 83.156  | 9.8                    | 7               | 15          | 1.6                    | 1               | 2           |
| Q29RZ9           | WDR92       | WD repeat-containing protein 92    | 39.817  | 7.3                    | 1               | 1           | #N/A                   | #N/A            | #N/A        |
| F1MRF3           | WDSUB1      | Uncharacterized protein            | 52.95   | 9.2                    | 3               | 3           | #N/A                   | #N/A            | #N/A        |
| F1MZD1           | WEE2        | Uncharacterized protein            | 62.464  | 19.6                   | 11              | 42          | 14.3                   | 7               | 22          |
| G3N348           | WFS1        | Uncharacterized protein            | 99.741  | 11.8                   | 11              | 18          | 1.9                    | 2               | 2           |
| F1MW50           | WHSC2       | Uncharacterized protein            | 45.968  | 8.1                    | 3               | 5           | #N/A                   | #N/A            | #N/A        |
| A6QPH1           | WIBG        | Partner of Y14 and mago            | 22.662  | 14.8                   | 2               | 2           | 23.6                   | 3               | 3           |
| E1B777           | WIPF2       | Uncharacterized protein            | 46.141  | 14.8                   | 5               | 12          | 7.5                    | 3               | 5           |
| Q2KJ60           | WIPI2       | Uncharacterized protein            | 47.622  | 5.3                    | 3               | 3           | 4.4                    | 2               | 4           |
| E1BDN1           | WLS         | Uncharacterized protein            | 62.268  | 3                      | 2               | 3           | 7.4                    | 4               | 6           |
| E1BN63           | WNK1        | Uncharacterized protein            | 247.46  | 1.6                    | 5               | 6           | 0.7                    | 2               | 2           |
| F1MGL0           | WRNIP1      | Uncharacterized protein (Fragment) | 53.401  | 6.1                    | 3               | 3           | #N/A                   | #N/A            | #N/A        |
| Q0P5N4           | WVOX        | Uncharacterized protein            | 46.191  | 13.8                   | 5               | 5           | 2.4                    | 1               | 1           |
| A3KMV3           | WWP2        | E3 ubiquitin-protein ligase        | 98.695  | 3.4                    | 1               | 2           | 1                      | 1               | 1           |
| G3MWG5           | XIAP        | Uncharacterized protein            | 56.533  | 1.8                    | 1               | 1           | #N/A                   | #N/A            | #N/A        |
| E1BL04           | XIRP2       | Uncharacterized protein            | 428.73  | 0.3                    | 1               | 5           | #N/A                   | #N/A            | #N/A        |
| Q1JPJ2           | XPNPEP1     | Xaa-Pro aminopeptidase 1           | 69.789  | 51.8                   | 23              | 45          | 12.8                   | 8               | 17          |
| E1B735           | XPNPEP2     | Uncharacterized protein            | 75.635  | #N/A                   | #N/A            | #N/A        | 1.3                    | 1               | 6           |
| E1BE98           | XP01        | Uncharacterized protein            | 123.14  | 36.4                   | 31              | 74          | 7.3                    | 8               | 16          |
| F1MUF1           | XP05        | Uncharacterized protein (Fragment) | 132.42  | 7.5                    | 8               | 11          | 2.5                    | 4               | 6           |
| F1MI29           | XP06        | Uncharacterized protein (Fragment) | 128.77  | 5.3                    | 5               | 9           | 1.2                    | 2               | 4           |
| A1A4I8           | XP07        | Uncharacterized protein            | 123.89  | 22.1                   | 22              | 36          | 14                     | 17              | 27          |
| E1B8Q8           | XPOT        | Uncharacterized protein            | 110.28  | 16                     | 13              | 22          | #N/A                   | #N/A            | #N/A        |
| F1MHL9           | XPR1        | Uncharacterized protein            | 81.57   | 4                      | 3               | 3           | 1.1                    | 1               | 1           |
| F1N2F9           | XRCC1       | Uncharacterized protein (Fragment) | 70.482  | 3.9                    | 3               | 3           | 4                      | 3               | 5           |
| G5E5D1           | XRCC5       | Uncharacterized protein            | 83.006  | 9.1                    | 6               | 14          | 3.8                    | 3               | 3           |



| Accession number | Gene symbol | Discription                                   | MW(kDa) | Biological Replicate 1 |                 |             | Biological Replicate 2 |                 |             |
|------------------|-------------|-----------------------------------------------|---------|------------------------|-----------------|-------------|------------------------|-----------------|-------------|
|                  |             |                                               |         | Sequence coverage(%)   | Unique peptides | MS/MS count | Sequence coverage(%)   | Unique peptides | MS/MS count |
| F1MMD5           | XRCC6       | Uncharacterized protein                       | 70.476  | 11.1                   | 5               | 6           | 3.8                    | 2               | 4           |
| Q3SYZ6           | XYLB        | Xylulose kinase                               | 53.304  | 2.2                    | 1               | 3           | #N/A                   | #N/A            | #N/A        |
| F1MHM5           | YARS        | Tyrosine--tRNA ligase, cytoplasmic            | 59.16   | 24.8                   | 12              | 19          | 11.9                   | 7               | 11          |
| A5D7G0           | YARS2       | Uncharacterized protein                       | 52.991  | 21.3                   | 7               | 11          | 7.5                    | 3               | 8           |
| P67808           | YBX1        | Nuclease-sensitive element-binding protein 1  | 35.924  | 18.2                   | 1               | 1           | 18.2                   | 1               | 2           |
| A5D7M4           | YBX2        | Uncharacterized protein                       | 38.268  | 53.1                   | 13              | 130         | 49.4                   | 9               | 57          |
| F1MC73           | YDJC        | Uncharacterized protein                       | 34.294  | 6.2                    | 2               | 3           | 5.3                    | 2               | 3           |
| Q32LE1           | YEATS4      | Uncharacterized protein                       | 26.543  | 6.6                    | 1               | 2           | #N/A                   | #N/A            | #N/A        |
| A7MB57           | YES1        | Uncharacterized protein                       | 60.596  | 4.8                    | 3               | 7           | 4.6                    | 2               | 2           |
| E1BGG4           | YIF1B       | Uncharacterized protein                       | 34.142  | 4.2                    | 1               | 1           | #N/A                   | #N/A            | #N/A        |
| A7MB97           | YIPF2       | Uncharacterized protein                       | 34.899  | 2.6                    | 1               | 1           | #N/A                   | #N/A            | #N/A        |
| F1MHD7           | YIPF4       | Uncharacterized protein                       | 26.693  | 3.8                    | 1               | 1           | #N/A                   | #N/A            | #N/A        |
| Q5E9E8           | YIPF5       | Protein YIPF5                                 | 28.016  | 3.5                    | 1               | 1           | 3.5                    | 1               | 7           |
| A6QLC6           | YIPF6       | Protein YIPF6                                 | 26.184  | 13.6                   | 3               | 6           | #N/A                   | #N/A            | #N/A        |
| Q3T000           | YKT6        | Synaptobrevin homolog YKT6                    | 22.466  | 57.6                   | 11              | 31          | 22.2                   | 5               | 14          |
| A6QR12           | YME1L1      | Uncharacterized protein                       | 80.059  | 7                      | 4               | 4           | 4.5                    | 3               | 3           |
| Q0VC80           | YRDC        | YrdC domain-containing protein, mitochondrial | 28.893  | 4.3                    | 1               | 2           | #N/A                   | #N/A            | #N/A        |
| E1BAQ2           | YTHDF1      | Uncharacterized protein                       | 60.717  | 3.7                    | 2               | 2           | #N/A                   | #N/A            | #N/A        |
| Q0VCZ3           | YTHDF2      | YTH domain family protein 2                   | 62.449  | #N/A                   | #N/A            | #N/A        | 3.6                    | 1               | 1           |
| E1BH80           | YTHDF3      | Uncharacterized protein                       | 63.74   | #N/A                   | #N/A            | #N/A        | 6.5                    | 2               | 5           |
| P62261           | YWHAE       | 14-3-3 protein epsilon                        | 29.174  | 71                     | 19              | 144         | 51                     | 12              | 72          |
| P68509           | YWHAH       | 14-3-3 protein eta                            | 28.211  | 61.4                   | 11              | 32          | 25.6                   | 4               | 11          |
| Q3SZI4           | YWHAQ       | 14-3-3 protein theta                          | 27.764  | 66.1                   | 11              | 28          | 36.7                   | 7               | 17          |
| P63103           | YWHAZ       | 14-3-3 protein zeta/delta                     | 27.745  | 74.7                   | 14              | 108         | 47.8                   | 9               | 62          |
| Q1PSA0           | ZAR1        | Uncharacterized protein                       | 42.009  | 23.4                   | 9               | 22          | 21.9                   | 9               | 36          |
| Q1XFL1           | ZAR1L       | ZAR1-like protein                             | 36.053  | 34.6                   | 9               | 17          | 19.8                   | 6               | 18          |
| Q1RMM1           | ZC3H15      | Zinc finger CCCH domain-containing protein 15 | 48.527  | 12                     | 5               | 6           | 6.1                    | 3               | 5           |
| F1MQG4           | ZDBF2       | Uncharacterized protein                       | 252.21  | 0.6                    | 1               | 2           | #N/A                   | #N/A            | #N/A        |
| F1MCX6           | ZDHHC13     | Palmitoyltransferase                          | 71.065  | 15.6                   | 8               | 12          | 14.5                   | 8               | 22          |

| Accession number  | Gene symbol | Discription                                                 | MW(kDa) | Biological Replicate 1 |                 |             | Biological Replicate 2 |                 |             |
|-------------------|-------------|-------------------------------------------------------------|---------|------------------------|-----------------|-------------|------------------------|-----------------|-------------|
|                   |             |                                                             |         | Sequence coverage(%)   | Unique peptides | MS/MS count | Sequence coverage(%)   | Unique peptides | MS/MS count |
| A5PJK9            | ZFP3        | Uncharacterized protein                                     | 58.337  | #N/A                   | #N/A            | #N/A        | 2                      | 1               | 1           |
| Q2YDD3            | ZFPL1       | Zinc finger protein-like 1                                  | 34.401  | 13.1                   | 4               | 7           | 7.1                    | 2               | 2           |
| G3N025            | ZFYVE1      | Uncharacterized protein                                     | 86.954  | 10.3                   | 6               | 7           | 3.6                    | 3               | 6           |
| Q2HJ64            | ZFYVE19     | Uncharacterized protein                                     | 44.232  | 7.8                    | 2               | 3           | #N/A                   | #N/A            | #N/A        |
| F1MKY4            | ZFYVE9      | Uncharacterized protein                                     | 156.22  | #N/A                   | #N/A            | #N/A        | 0.6                    | 1               | 1           |
| G3MWN0            | ZGLP1       | Uncharacterized protein (Fragment)                          | 27.123  | #N/A                   | #N/A            | #N/A        | 3.6                    | 1               | 1           |
| A8KC64            | ZHX1        | Uncharacterized protein                                     | 98.124  | #N/A                   | #N/A            | #N/A        | 2.3                    | 1               | 1           |
| F1MVH9            | ZNF207      | Uncharacterized protein                                     | 45.283  | 5.7                    | 2               | 3           | #N/A                   | #N/A            | #N/A        |
| Q2TBX0            | ZNF259      | Zinc finger protein ZPR1                                    | 51.015  | 13.5                   | 6               | 12          | #N/A                   | #N/A            | #N/A        |
| G3N065            | ZNF385C     | Uncharacterized protein                                     | 53.189  | 2                      | 1               | 1           | #N/A                   | #N/A            | #N/A        |
| E1BF46            | ZNF407      | Uncharacterized protein                                     | 239.98  | 0.7                    | 2               | 9           | 0.7                    | 2               | 11          |
| E1BMZ4            | ZNF436      | Uncharacterized protein                                     | 54.549  | 2.8                    | 1               | 1           | 4.7                    | 2               | 2           |
| G3X749            | ZNF503      | Uncharacterized protein                                     | 51.193  | #N/A                   | #N/A            | #N/A        | 1.9                    | 1               | 2           |
| F1MEB7            | ZNF645      | Uncharacterized protein                                     | 54.505  | 16.5                   | 6               | 11          | 3.5                    | 2               | 3           |
| Q9BH10            | ZP2         | Zona pellucida sperm-binding                                | 79.547  | 38.3                   | 22              | 496         | 20.3                   | 12              | 465         |
| P48830            | ZP3         | Zona pellucida sperm-binding                                | 46.545  | 26.4                   | 13              | 345         | 28                     | 14              | 272         |
| Q9BH11            | ZP4         | Zona pellucida sperm-binding                                | 59.2    | 25.5                   | 13              | 366         | 22.1                   | 10              | 122         |
| A7YWH2            | ZRANB2      | Uncharacterized protein                                     | 36.291  | 7.2                    | 2               | 2           | #N/A                   | #N/A            | #N/A        |
| Q0P5L6            | ZW10        | Uncharacterized protein                                     | 88.416  | 21.7                   | 14              | 22          | 6.2                    | 5               | 14          |
| A6QM04            | ZWILCH      | Protein zwilch homolog                                      | 66.384  | 22.6                   | 12              | 19          | 6.3                    | 4               | 6           |
| A4FUE7;<br>G1K1W5 | ZC2HC1A     | Zinc finger C2HC domain-containing protein 1A               | 35.113  | 23.5                   | 9               | 14          | 10                     | 3               | 4           |
| A4IFM2;<br>Q3ZKN0 | SLC27A1     | Long-chain fatty acid transport protein 1                   | 71.023  | 12.7                   | 8               | 12          | 8.2                    | 4               | 4           |
| A5D7P3;<br>P43033 | PAFAH1B1    | Platelet-activating factor acetylhydrolase IB subunit alpha | 46.67   | 30.5                   | 12              | 23          | 27.3                   | 10              | 19          |
| A5D7S0;<br>P81125 | NAPA        | Alpha-soluble NSF attachment protein                        | 33.204  | 59                     | 14              | 30          | 24.1                   | 6               | 17          |
| A5PK73;<br>Q3T0S5 | ALDOB       | Fructose-bisphosphate aldolase                              | 39.527  | 29.9                   | 9               | 12          | 27.7                   | 8               | 13          |
| A6H7J6;<br>P05307 | P4HB        | P4HB protein                                                | 57.203  | 72                     | 43              | 205         | 50.2                   | 29              | 219         |

| Accession number  | Gene symbol  | Discription                                        | MW(kDa) | Biological Replicate 1 |                 |             | Biological Replicate 2 |                 |             |
|-------------------|--------------|----------------------------------------------------|---------|------------------------|-----------------|-------------|------------------------|-----------------|-------------|
|                   |              |                                                    |         | Sequence coverage(%)   | Unique peptides | MS/MS count | Sequence coverage(%)   | Unique peptides | MS/MS count |
| A6QLC7;<br>F1MXL8 | TRAPPC11     | Trafficking protein particle complex subunit 11    | 128.27  | 26.6                   | 24              | 37          | 9                      | 10              | 22          |
| A6QLW5;<br>Q58DN0 | DSCR3        | DSCR3 protein                                      | 32.57   | 16.8                   | 4               | 10          | 4.6                    | 1               | 1           |
| A6QR09;<br>E1BJ79 | SLC25A26     | S-adenosylmethionine mitochondrial carrier protein | 29.409  | 20.8                   | 4               | 7           | 6.2                    | 2               | 4           |
| A7Z057;<br>P68252 | YWHAG        | 14-3-3 protein gamma                               | 28.302  | 66                     | 9               | 30          | 30.4                   | 6               | 21          |
| A8E4Q4;<br>Q58DH2 | PISD         | PISD protein                                       | 31.769  | 13.9                   | 4               | 8           | 7.5                    | 4               | 6           |
| A8QQF2;<br>E1BHQ9 | MCAM         | MCAM protein                                       | 49.002  | 2                      | 1               | 2           | 3.3                    | 2               | 3           |
| C7FFR6;<br>Q1JQ93 | DPM1         | Dolichol-phosphate mannosyltransferase             | 29.606  | 40                     | 11              | 21          | 20.8                   | 6               | 11          |
| E1BB06;<br>G3N135 | FMNL2        | Uncharacterized protein                            | 98.583  | 4.6                    | 1               | 5           | 1.9                    | 2               | 2           |
| E1BB79;<br>G3NOM0 | TNN          | Uncharacterized protein                            | 98.583  | 2                      | 2               | 3           | 1.9                    | 2               | 3           |
| E1BCE7;<br>F1MID5 | CNOT2        | Uncharacterized protein (Fragment)                 | 16.346  | 10.4                   | 5               | 6           | 4.2                    | 2               | 6           |
| E1BHW7;<br>G3N2P9 | C18orf8      | Uncharacterized protein                            | 98.583  | 4.4                    | 3               | 3           | 2.2                    | 1               | 2           |
| E1BL56;<br>E1BH11 | SH3BP1       | Uncharacterized protein                            | 98.583  | 20.6                   | 13              | 24          | 8.5                    | 4               | 8           |
| E1BL66;<br>G3MX31 | LOC101902617 | Uncharacterized protein                            | 98.583  | 27.8                   | 5               | 9           | 23                     | 1               | 1           |
| E1BP30;<br>Q1LZ76 | RTN1         | Reticulon (Fragment)                               | 75.828  | 4.7                    | 3               | 4           | 7.7                    | 2               | 8           |
| F1MD39;<br>P59837 | RDH12        | Retinol dehydrogenase 12                           | 35.084  | 35.1                   | 10              | 19          | 18.7                   | 5               | 9           |
| F1ME95;<br>Q148L1 | GPR108       | Protein GPR108                                     | 42.253  | 4.5                    | 2               | 2           | 5.1                    | 3               | 8           |

| Accession number  | Gene symbol | Discription                                                   | MW(kDa) | Biological Replicate 1 |                 |             | Biological Replicate 2 |                 |             |
|-------------------|-------------|---------------------------------------------------------------|---------|------------------------|-----------------|-------------|------------------------|-----------------|-------------|
|                   |             |                                                               |         | Sequence coverage(%)   | Unique peptides | MS/MS count | Sequence coverage(%)   | Unique peptides | MS/MS count |
| F1MGC0;<br>Q148D5 | SUCLA2      | Succinyl-CoA ligase [ADP-forming] subunit beta, mitochondrial | 50.146  | 43.2                   | 18              | 51          | 26.1                   | 15              | 49          |
| F1MLB8;<br>P19483 | ATP5A1      | ATP synthase subunit alpha                                    | 59.689  | 68.9                   | 1               | 144         | 39.8                   | 23              | 126         |
| F1MMI4;<br>Q32KV2 | MAEL        | Protein maelstrom homolog                                     | 47.375  | 34.5                   | 11              | 22          | 7.6                    | 3               | 5           |
| F1MMY6;<br>Q3SYU7 | TNPO1       | Transportin-1 (Fragment)                                      | 97.325  | 20.5                   | 10              | 32          | 9                      | 5               | 22          |
| F1MNT3;<br>P16386 | LIPE        | Hormone-sensitive lipase                                      | 82.638  | 8.7                    | 6               | 10          | 3.2                    | 3               | 4           |
| F1MVI1;<br>Q8HXM1 | CSTF2       | Cleavage stimulation factor subunit 2                         | 62.436  | 9                      | 4               | 9           | 4.9                    | 3               | 4           |
| F1MVW4;<br>A5PJX2 | XP04        | Uncharacterized protein (Fragment)                            | 16.346  | 5.7                    | 5               | 6           | 1.5                    | 1               | 1           |
| F1MW91;<br>A6H7I5 | DNM2        | Dynammin-2 (Fragment)                                         | 92.283  | 29.3                   | 17              | 46          | 16.6                   | 16              | 36          |
| F1MX38;<br>P61635 | STAT3       | Signal transducer and activator of transcription              | 86.929  | 29.7                   | 18              | 27          | 7.3                    | 6               | 9           |
| F1MYH8;<br>Q3SYT7 | PSMD8       | 26S proteasome non-ATPase regulatory subunit 8                | 32.523  | 29.3                   | 9               | 15          | 16.7                   | 6               | 15          |
| F1MZD5;<br>Q8SPU8 | DHRS4       | Dehydrogenase/reductase SDR family member 4                   | 29.454  | 15.1                   | 4               | 5           | 20.8                   | 6               | 15          |
| F1MZF0;<br>A6QPB2 | GRSF1       | Uncharacterized protein (Fragment)                            | 16.346  | 26.6                   | 7               | 14          | 2.8                    | 1               | 3           |
| F1MZN7;<br>Q2TBW7 | SNX2        | Sorting nexin-2                                               | 58.434  | 18.9                   | 7               | 10          | 9.1                    | 3               | 3           |
| F1NOE5;<br>Q2T9X2 | CCT4        | T-complex protein 1 subunit delta                             | 58.161  | 66.8                   | 32              | 108         | 43.4                   | 25              | 95          |
| F1NON6;<br>Q32P66 | C3H1orf123  | Uncharacterized protein                                       | 98.583  | 29.4                   | 5               | 9           | 34.4                   | 5               | 11          |
| F1N103;<br>Q5EA64 | COCH        | Cochlin                                                       | 59.595  | 37.5                   | 20              | 79          | 22.2                   | 13              | 54          |

| Accession number  | Gene symbol | Discription                                          | MW(kDa) | Biological Replicate 1 |                 |             | Biological Replicate 2 |                 |             |
|-------------------|-------------|------------------------------------------------------|---------|------------------------|-----------------|-------------|------------------------|-----------------|-------------|
|                   |             |                                                      |         | Sequence coverage(%)   | Unique peptides | MS/MS count | Sequence coverage(%)   | Unique peptides | MS/MS count |
| F1N1S0;<br>Q32PB0 | SSBP1       | Single-stranded DNA-binding protein                  | 17.191  | 37.8                   | 7               | 22          | 33.8                   | 6               | 13          |
| F1N2B5;<br>Q08DL0 | SLC3A2      | Uncharacterized protein                              | 98.583  | 30                     | 11              | 22          | 11.9                   | 6               | 13          |
| F1N2L9;<br>Q2KJH9 | ALDH9A1     | 4-trimethylaminobutyraldehyde dehydrogenase          | 53.991  | 25.5                   | 12              | 29          | 24.9                   | 11              | 36          |
| F1N3H1;<br>Q3TOK1 | CALU        | Calumenin                                            | 37.086  | 32.7                   | 10              | 21          | 30.5                   | 11              | 26          |
| F1N6Z0;<br>Q0P5A6 | PSMD5       | 26S proteasome non-ATPase regulatory subunit 5       | 56.17   | 53.6                   | 21              | 58          | 19.7                   | 9               | 23          |
| F1N7N8;<br>P09851 | RASA1       | Ras GTPase-activating protein 1                      | 115.86  | 41.4                   | 37              | 80          | 10.7                   | 13              | 27          |
| F2Z4I1;<br>Q56JV3 | RHEB        | GTP-binding protein Rheb                             | 20.479  | 56.5                   | 11              | 23          | 27.7                   | 7               | 19          |
| F2Z4J5;<br>Q3ZC12 | EIF3G       | Eukaryotic translation initiation factor 3 subunit G | 35.611  | 31.9                   | 8               | 16          | 19.1                   | 6               | 8           |
| F2Z4J6;<br>Q2KIN8 | GTF2B       | Transcription initiation factor IIB                  | 34.833  | 25                     | 6               | 8           | 14.2                   | 4               | 5           |
| F6Q200;<br>Q1JJP6 | PK2         | Uncharacterized protein                              | 98.583  | 14.5                   | 4               | 6           | 9.3                    | 2               | 2           |
| G3MX91;<br>Q2KJ45 | TARDBP      | Uncharacterized protein                              | 98.583  | 12.3                   | 4               | 5           | 5.7                    | 2               | 2           |
| G3X780;<br>Q32LJ6 | RABL3       | Rab-like protein 3 (Fragment)                        | 21.562  | 10                     | 2               | 2           | 12.7                   | 3               | 7           |
| G3X8E2;<br>Q2HJB1 | VPS4A       | Uncharacterized protein (Fragment)                   | 16.346  | 13                     | 5               | 9           | 9.1                    | 4               | 5           |
| G8JKV4;<br>Q9NOF3 | SARS2       | Serine--tRNA ligase, mitochondrial                   | 51.722  | 36.6                   | 13              | 29          | 9.7                    | 4               | 6           |
| O02751;<br>F1MS40 | CFDP2       | Craniofacial development protein 2                   | 66.324  | 29.9                   | 7               | 9           | 16.6                   | 7               | 30          |
| O46414;<br>G1K1K0 | FTH1        | Ferritin heavy chain                                 | 21.051  | 27.6                   | 4               | 8           | 32.8                   | 6               | 21          |



| Accession number  | Gene symbol | Discription                                                                  | MW(kDa) | Biological Replicate 1 |                 |             | Biological Replicate 2 |                 |             |
|-------------------|-------------|------------------------------------------------------------------------------|---------|------------------------|-----------------|-------------|------------------------|-----------------|-------------|
|                   |             |                                                                              |         | Sequence coverage(%)   | Unique peptides | MS/MS count | Sequence coverage(%)   | Unique peptides | MS/MS count |
| Q3SZ76;<br>F1MUK6 | COMMD3      | COMM domain-containing protein 3                                             | 22.31   | 45.6                   | 6               | 10          | 12.6                   | 2               | 5           |
| Q3SZA5;<br>F1ME02 | SMS         | Spermine synthase                                                            | 41.224  | 62.2                   | 24              | 69          | 27.8                   | 12              | 33          |
| Q3T0F5;<br>F1MJQ1 | RAB7A       | Ras-related protein Rab-7a                                                   | 23.544  | 78.3                   | 16              | 54          | 53.6                   | 11              | 60          |
| Q3ZBL4;<br>F1MNG7 | LZTFL1      | Leucine zipper transcription factor-like protein 1                           | 34.577  | 27.4                   | 8               | 10          | 7                      | 2               | 2           |
| Q58D01;<br>Q58DA0 | PSMD4       | 26S proteasome non-ATPase regulatory subunit 4                               | 33.96   | 29.4                   | 6               | 7           | 13.4                   | 5               | 11          |
| Q58D97;<br>O77689 | CCNB2       | Cyclin B2                                                                    | 28.792  | 6.4                    | 2               | 2           | 2.8                    | 1               | 1           |
| Q58DK4;<br>A0JN77 | DAK         | Bifunctional ATP-dependent dihydroxyacetone kinase/FAD-AMP lyase (cyclizing) | 59.012  | 34.6                   | 15              | 30          | 15.1                   | 8               | 17          |
| Q5E9V6;<br>Q58DF4 | COMMD4      | COMM domain-containing protein 4                                             | 21.648  | 28.1                   | 6               | 15          | 23.5                   | 5               | 12          |
| Q7YS70;<br>F1MEY2 | MECR        | Trans-2-enoyl-CoA reductase, mitochondrial                                   | 40.274  | 11                     | 4               | 5           | 4                      | 1               | 1           |
| A1A4J7-2          |             | Isoform 2 of Protein SMG8                                                    | 105.02  | 5.9                    | 5               | 7           | #N/A                   | #N/A            | #N/A        |
| A4FV58-2          |             | Isoform 2 of Cytosolic Fe-S cluster assembly factor NARFL                    | 39.1    | 5.8                    | 2               | 2           | #N/A                   | #N/A            | #N/A        |
| A5PK51-2          |             | Isoform 2 of Nicotinate phosphoribosyltransferase                            | 57.387  | 2.8                    | 1               | 1           | #N/A                   | #N/A            | #N/A        |
| A6H754-2          |             | Isoform 2 of Hsp90 co-chaperone Cdc37-like 1                                 | 35.282  | 8.2                    | 3               | 4           | 8.2                    | 3               | 5           |
| A6QNS3-2          |             | Isoform 2 of Active breakpoint cluster region-related protein                | 31.599  | 3.6                    | 1               | 2           | #N/A                   | #N/A            | #N/A        |
| A6QQF5            |             | Quinone oxidoreductase-like protein                                          | 37.668  | 5.4                    | 1               | 1           | #N/A                   | #N/A            | #N/A        |
| E1B9D4            |             | Uncharacterized protein                                                      | 20.482  | 5.5                    | 1               | 1           | 5                      | 1               | 1           |
| E1BAY3            |             | Uncharacterized protein                                                      | 54.378  | #N/A                   | #N/A            | #N/A        | 1.8                    | 1               | 2           |

| Accession number | Gene symbol | Discription                                                  | MW(kDa) | Biological Replicate 1 |                 |             | Biological Replicate 2 |                 |             |
|------------------|-------------|--------------------------------------------------------------|---------|------------------------|-----------------|-------------|------------------------|-----------------|-------------|
|                  |             |                                                              |         | Sequence coverage(%)   | Unique peptides | MS/MS count | Sequence coverage(%)   | Unique peptides | MS/MS count |
| E1BBV5           |             | Uncharacterized protein (Fragment)                           | 18.39   | #N/A                   | #N/A            | #N/A        | 6.6                    | 1               | 1           |
| E1BBW6           |             | Uncharacterized protein                                      | 13.116  | #N/A                   | #N/A            | #N/A        | 9.2                    | 1               | 4           |
| E1BC32           |             | Uncharacterized protein                                      | 38.38   | #N/A                   | #N/A            | #N/A        | 3.3                    | 1               | 2           |
| E1BCT3           |             | Uncharacterized protein                                      | 170.05  | 1                      | 1               | 1           | #N/A                   | #N/A            | #N/A        |
| E1BEF1           |             | Uncharacterized protein                                      | 18.903  | 11.9                   | 2               | 2           | #N/A                   | #N/A            | #N/A        |
| E1BF78           |             | Uncharacterized protein                                      | 18.548  | 28                     | 4               | 6           | 11.3                   | 2               | 4           |
| E1BFC9           |             | Uncharacterized protein                                      | 16.695  | 42.7                   | 2               | 87          | 44.1                   | 2               | 73          |
| E1BFZ9           |             | Uncharacterized protein                                      | 94.099  | 6.6                    | 6               | 10          | 4.4                    | 3               | 6           |
| E1BH99           |             | Uncharacterized protein                                      | 17.757  | #N/A                   | #N/A            | #N/A        | 7.3                    | 1               | 2           |
| E1BHJ0           |             | Profilin                                                     | 15.057  | 79.3                   | 1               | 1           | 47.9                   | 1               | 1           |
| E1BIU3           |             | Uncharacterized protein                                      | 21.086  | 14.5                   | 2               | 2           | #N/A                   | #N/A            | #N/A        |
| E1BJN0           |             | Uncharacterized protein                                      | 19.936  | 28.1                   | 5               | 9           | 11.1                   | 2               | 6           |
| E1BKY8           |             | Uncharacterized protein                                      | 57.015  | 2.3                    | 1               | 1           | #N/A                   | #N/A            | #N/A        |
| E1BL61           |             | Uncharacterized protein                                      | 12.562  | #N/A                   | #N/A            | #N/A        | 11.8                   | 1               | 2           |
| E1BMW2           |             | Uncharacterized protein (Fragment)                           | 106.91  | 23.8                   | 10              | 13          | 14.5                   | 4               | 4           |
| E1BN74           |             | Uncharacterized protein                                      | 33.439  | 12.9                   | 4               | 6           | #N/A                   | #N/A            | #N/A        |
| F1MB80           |             | NADH dehydrogenase [ubiquinone] 1 alpha subcomplex subunit 2 | 10.903  | 22.4                   | 3               | 5           | 10.2                   | 2               | 7           |
| F1MCK4           |             | Uncharacterized protein                                      | 24.064  | 13.4                   | 3               | 3           | #N/A                   | #N/A            | #N/A        |
| F1MCL7           |             | Uncharacterized protein                                      | 146.25  | 5.8                    | 6               | 8           | 1.4                    | 2               | 2           |
| F1ME51           |             | Uncharacterized protein                                      | 65.536  | 4.1                    | 1               | 1           | #N/A                   | #N/A            | #N/A        |
| F1ME91           |             | Uncharacterized protein                                      | 38.878  | 13.1                   | 1               | 3           | 8.1                    | 1               | 3           |
| F1MFW0           |             | Uncharacterized protein (Fragment)                           | 23.855  | 19.6                   | 1               | 4           | #N/A                   | #N/A            | #N/A        |
| F1MJU4           |             | Uncharacterized protein (Fragment)                           | 140.77  | 9.9                    | 3               | 10          | #N/A                   | #N/A            | #N/A        |
| F1MKM4           |             | Uncharacterized protein                                      | 75.429  | 1.8                    | 1               | 1           | #N/A                   | #N/A            | #N/A        |
| F1MLM3           |             | Uncharacterized protein (Fragment)                           | 112.3   | 15.6                   | 13              | 21          | 5                      | 5               | 10          |
| F1MLW8           |             | Uncharacterized protein                                      | 24.623  | 13.7                   | 1               | 4           | 6.9                    | 1               | 37          |
| F1MNP3           |             | Uncharacterized protein                                      | 120.61  | #N/A                   | #N/A            | #N/A        | 1.2                    | 1               | 2           |
| F1MU60           |             | Uncharacterized protein                                      | 18.389  | 14.5                   | 2               | 2           | 11.5                   | 1               | 1           |
| F1MV39           |             | Uncharacterized protein (Fragment)                           | 21.498  | 30.3                   | 6               | 17          | 20                     | 3               | 7           |
| F1MWK9           |             | Uncharacterized protein (Fragment)                           | 25.517  | #N/A                   | #N/A            | #N/A        | 12.8                   | 3               | 4           |
| F1N741           |             | Uncharacterized protein (Fragment)                           | 55.79   | 6.3                    | 1               | 1           | #N/A                   | #N/A            | #N/A        |







| Accession number | Gene symbol | Discription                                                                             | MW(kDa) | Biological Replicate 1 |                 |             | Biological Replicate 2 |                 |             |
|------------------|-------------|-----------------------------------------------------------------------------------------|---------|------------------------|-----------------|-------------|------------------------|-----------------|-------------|
|                  |             |                                                                                         |         | Sequence coverage(%)   | Unique peptides | MS/MS count | Sequence coverage(%)   | Unique peptides | MS/MS count |
| Q05B54-2         |             | Isoform 2 of Transmembrane protein 134                                                  | 20.12   | #N/A                   | #N/A            | #N/A        | 8.3                    | 1               | 1           |
| Q08D83-2         |             | Isoform 2 of Reticulon-3                                                                | 25.496  | 15.2                   | 4               | 10          | 8                      | 2               | 13          |
| Q0V7M7-2         |             | Isoform 2 of Spindle and kinetochore-associated protein 1                               | 26.213  | #N/A                   | #N/A            | #N/A        | 8.8                    | 2               | 2           |
| Q27966-2         |             | Isoform 2 of Unconventional myosin-Ic                                                   | 118.15  | 8.9                    | 7               | 7           | #N/A                   | #N/A            | #N/A        |
| Q29455-2         |             | Isoform CSP2 of DnaJ homolog subfamily C member 5                                       | 18.815  | #N/A                   | #N/A            | #N/A        | 14.4                   | 3               | 7           |
| Q29463           |             | Anionic trypsin                                                                         | 26.289  | 17                     | 3               | 7           | 7.3                    | 2               | 6           |
| Q29466-2         |             | Isoform 2 of V-type proton ATPase 116 kDa subunit a isoform 1                           | 95.63   | 22.7                   | 16              | 31          | 16.1                   | 12              | 27          |
| Q2KII7-2         |             | Isoform 2 of Peroxisomal membrane protein PEX16                                         | 34.609  | #N/A                   | #N/A            | #N/A        | 7.9                    | 2               | 5           |
| Q32PC9-2         |             | Isoform 2 of ADP-ribosylation factor-like protein 2-binding                             | 17.589  | 5.9                    | 1               | 2           | 5.9                    | 1               | 2           |
| Q3B7M2-2         |             | Isoform 2 of Hydroxyacylglutathione hydrolase, mitochondrial                            | 29.156  | 47.7                   | 9               | 26          | 21.5                   | 5               | 17          |
| Q58DG1           |             | UPF0160 protein MYG1, mitochondrial                                                     | 42.967  | 36.2                   | 10              | 28          | 6.6                    | 2               | 3           |
| Q5KR47-2         |             | Isoform 2 of Tropomyosin alpha-3 chain                                                  | 29.032  | 23                     | 1               | 12          | 29                     | 2               | 20          |
| Q8HXY9-2         |             | Isoform 2 of Craniofacial development protein 1                                         | 23.822  | 3.7                    | 1               | 3           | #N/A                   | #N/A            | #N/A        |
| Q9BGI1-2         |             | Isoform Cytoplasmic+peroxisomal of Peroxiredoxin-5, mitochondrial                       | 17.362  | 49.4                   | 8               | 21          | #N/A                   | #N/A            | #N/A        |
| Q9GKI7-2         |             | Isoform 2 of Collagen type IV alpha-3-binding protein                                   | 68.076  | 11.2                   | 6               | 8           | 4                      | 3               | 5           |
| Q9N1F0-2         |             | Isoform 2 of Protein MRV11                                                              | 93.135  | 3.1                    | 2               | 2           | 3.1                    | 3               | 4           |
| Q9N2J2-2         |             | Isoform Cytoplasmic of Phospholipid hydroperoxide glutathione peroxidase, mitochondrial | 19.436  | 52.9                   | 9               | 23          | 35.9                   | 6               | 16          |
| Q9TU23-2         |             | Isoform 2 of Centrosomal protein of 290 kDa                                             | 156.78  | 0.7                    | 1               | 1           | #N/A                   | #N/A            | #N/A        |

**Table S2. GO analysis of identified buffalo oocyte proteins.**

| Category      | Term                                                      | Count | %           | PValue    | Genes                                                                                                                                                                                                                                                                                                                                                                                                                                                                                                                                                                                                                                                                                                                                                                                                                                                                                                                                                                                                                                                                                                                                                                                                                                                                                                                                                                                                                                                                                                                                                                  | List Total | Pop Hits | Pop Total | Fold Enrichment | Bonferroni  | Benjamini   | FDR         |
|---------------|-----------------------------------------------------------|-------|-------------|-----------|------------------------------------------------------------------------------------------------------------------------------------------------------------------------------------------------------------------------------------------------------------------------------------------------------------------------------------------------------------------------------------------------------------------------------------------------------------------------------------------------------------------------------------------------------------------------------------------------------------------------------------------------------------------------------------------------------------------------------------------------------------------------------------------------------------------------------------------------------------------------------------------------------------------------------------------------------------------------------------------------------------------------------------------------------------------------------------------------------------------------------------------------------------------------------------------------------------------------------------------------------------------------------------------------------------------------------------------------------------------------------------------------------------------------------------------------------------------------------------------------------------------------------------------------------------------------|------------|----------|-----------|-----------------|-------------|-------------|-------------|
| GOTERM_BP_FAT | GO:0015031-protein transport                              | 179   | 8.352776482 | 2.35E-40  | P81623, Q0VCL3, Q71SS4, Q02399, Q3ZBM5, Q3SZN2, Q3T087, Q3ZBV2, Q08E32, Q3SZF2, Q0IIG8, P53620, A1A4I8, Q0IIG7, Q5E9Q4, Q2TBX8, P61763, Q24K11, Q32KR9, Q3T000, Q3T178, A6QR22, A5D7D1, Q1JQ98, Q2KIU0, Q2TBH9, Q28104, A5PKA5, P62261, P45478, Q17QF8, Q2TBH7, Q3ZBW4, A7YWD2, Q2T9P4, Q5E9Y2, P10948, Q3T093, Q3T0F5, Q17R06, Q3ZCH0, Q1RMR4, Q9GKZ4, Q5E9I6, Q3ZBT5, A1L567, Q2KJ37, A5P1F9, Q5E9A4, Q27954, Q3SX42, Q5E9A6, Q3SZD1, P35605, Q0P5N5, P35604, Q3ZBT1, Q5E9A1, Q5SDF6, P63103, A6QR46, Q3ZBGI, A5E4N0, Q0VCB4, Q32KP9, P81127, P53619, Q0VCK5, Q3ZBN8, Q5SDW6, P41541, Q08D55, A3KN15, P50397, A6QR35, Q3MHP2, Q3ZPGI, A7Y7Y5, Q58C57, Q3MHHG, Q0G846, Q5EA68, Q2YDM7, A7MAZ2, Q29RT6, Q5E9L7, Q0IIB6, Q9XT96, Q2T9M1, Q08DD7, Q17Q04, Q3SWZ3, Q17QI5, P84081, A7Z057, Q3ZL81, A6QR54, Q5E971, P49951, Q3ZC32, Q2YDH6, A4FUG8, Q2KHV6, Q2HIE9, A6QLS9, Q3SZC1, A4IFL0, Q5EA77, Q58DR5, Q2T9U1, P11023, Q86551, A6QLB1, A6QPK4, A6QPK6, Q148L0, P63009, Q3MHE8, Q3ZCC9, Q1LZB5, A2VDR8, Q5BIP4, Q6EWQ7, A1A4L0, Q3T054, Q2KII7, Q2KJ32, A5D7S0, Q5E9E8, A6QQL0, Q3SZB3, Q17QB7, Q08DB5, Q1RMV0, Q17Q51, A5PIZ5, A6H704, Q2KHX3, Q3ZKL9, Q3SZV6, Q2KH44, Q3ZC13, Q3ZL63, Q1RMR8, Q3SYW1, Q0V8C2, Q2HIG5, P52193, CIJZ67, Q1RMQ3, Q5E9F1, Q0VDS3, A6QLD1, Q17QC5, Q0V8S0, Q3T0U5, A3KN51, Q3SZ87, A4FV54, Q0P5F3, A6QNT8, Q3SZI7, Q148I4, Q3SZI4, Q2KJ81, A6QLL2, A0IN39, A2VEI8, Q2TBS1, Q2HHJ2, Q3T0D2, Q32KV6, Q3T0D7, P21856, P60519, Q58DS9, Q0V8B7, A2VE21, Q3SYV6, Q08DW1                                                                         | 1472       | 403      | 8785      | 2.650830389     | 7.21316E-37 | 7.21316E-37 | 4.24289E-37 |
| GOTERM_BP_FAT | GO:0045184-establishment of protein localization          | 179   | 8.352776482 | 3.553E-40 | P81623, Q0VCL3, Q71SS4, Q02399, Q3ZBM5, Q3SZN2, Q3T087, Q3ZBV2, Q08E32, Q3SZF2, Q0IIG8, P53620, A1A4I8, Q0IIG7, Q5E9Q4, Q2TBX8, P61763, Q24K11, Q32KR9, Q3T000, Q3T178, A6QR22, A5D7D1, Q1JQ98, Q2KIU0, Q2TBH9, Q28104, A5PKA5, P62261, P45478, Q17QF8, Q2TBH7, Q3ZBW4, A7YWD2, Q2T9P4, Q5E9Y2, P10948, Q3T093, Q3T0F5, Q17R06, Q3ZCH0, Q1RMR4, Q9GKZ4, Q5E9I6, Q3ZBT5, A1L567, Q2KJ37, A5P1F9, Q5E9A4, Q27954, Q3SX42, Q5E9A6, Q3SZD1, P35605, Q0P5N5, P35604, Q3ZBT1, Q5E9A1, Q5SDF6, P63103, A6QR46, Q3ZBGI, A5E4N0, Q0VCB4, Q32KP9, P81127, P53619, Q0VCK5, Q3ZBN8, Q5SDW6, P41541, Q08D55, A3KN15, P50397, A6QR35, Q3MHP2, Q3ZPGI, A7Y7Y5, Q58C57, Q3MHHG, Q0G846, Q5EA68, Q2YDM7, A7MAZ2, Q29RT6, Q5E9L7, Q0IIB6, Q9XT96, Q2T9M1, Q08DD7, Q17Q04, Q3SWZ3, Q17QI5, P84081, A7Z057, Q3ZL81, A6QR54, Q5E971, P49951, Q3ZC32, Q2YDH6, A4FUG8, Q2KHV6, Q2HIE9, A6QLS9, Q3SZC1, A4IFL0, Q5EA77, Q58DR5, Q2T9U1, P11023, Q86551, A6QLB1, A6QPK4, A6QPK6, Q148L0, P63009, Q3MHE8, Q3ZCC9, Q1LZB5, A2VDR8, Q5BIP4, Q6EWQ7, A1A4L0, Q3T054, Q2KII7, Q2KJ32, A5D7S0, Q5E9E8, A6QQL0, Q3SZB3, Q17QB7, Q08DB5, Q1RMV0, Q17Q51, A5PIZ5, A6H704, Q2KHX3, Q3ZKL9, Q3SZV6, Q2KH44, Q3ZC13, Q3ZL63, Q1RMR8, Q3SYW1, Q0V8C2, Q2HIG5, P52193, CIJZ67, Q1RMQ3, Q5E9F1, Q0VDS3, A6QLD1, Q17QC5, Q0V8S0, Q3T0U5, A3KN51, Q3SZ87, A4FV54, Q0P5F3, A6QNT8, Q3SZI7, Q148I4, Q3SZI4, Q2KJ81, A6QLL2, A0IN39, A2VEI8, Q2TBS1, Q2HHJ2, Q3T0D2, Q32KV6, Q3T0D7, P21856, P60519, Q58DS9, Q0V8B7, A2VE21, Q3SYV6, Q08DW1                                                                         | 1472       | 404      | 8785      | 2.644268928     | 1.09053E-36 | 5.45263E-37 | 6.41464E-37 |
| GOTERM_BP_FAT | GO:0008104-protein localization                           | 189   | 8.819412039 | 3.749E-39 | P81623, Q0VCL3, Q71SS4, Q02399, Q3ZBM5, Q3SZN2, Q3T087, Q3ZBV2, Q08E32, Q3SZF2, Q0IIG8, P53620, A1A4I8, Q0IIG7, Q5E9Q4, Q2TBX8, Q08DR9, P61763, Q24K11, Q32KR9, Q3T000, Q3T178, A6QR22, A5D7D1, Q1JQ98, Q2KIU0, Q2TBH9, Q28104, A5PKA5, P62261, P45478, Q17QF8, Q2TBH7, Q3ZBW4, A7YWD2, Q2T9P4, Q5E9Y2, P10948, Q3T093, Q3T0F5, Q17R06, A6QR14, Q3ZCH0, Q1RMR4, Q3MHH2, Q9GKZ4, Q5E9I6, Q3ZBT5, A1L567, Q3MHH6, Q2KJ37, A5P1F9, Q5E9A4, Q27954, Q3SX42, Q5E9A6, Q3SZD1, P35605, Q0P5N5, P35604, Q3ZBT1, Q5E9A1, Q5SDF6, P63103, A6QR46, Q3ZBGI, A5E4N0, Q0VCB4, Q32KP9, P81127, Q0VCK5, P53619, Q0VCK5, Q3ZBN8, Q5SDW6, P41541, Q08D55, A3KN15, P50397, A6QR35, Q3MHP2, Q3ZPGI, A7Y7Y5, Q58C57, Q3MHHG, Q0G846, Q5EA68, Q2YDM7, A7MAZ2, Q29RT6, Q5E9L7, Q0IIB6, Q9XT96, Q2T9M1, Q08DD7, Q17Q04, Q3SWZ3, Q17QI5, P84081, A7Z057, Q3ZL81, A6QR54, Q5E971, P49951, Q3ZC32, Q2YDH6, Q2KHV6, A4FUG8, Q2HIE9, A6QLS9, Q3SZC1, A4IFL0, Q5EA77, Q58DR5, Q2T9U1, P11023, Q86551, A6QLB1, A6QPK4, A6QPK6, Q148L0, P63009, Q3MHE8, Q3ZCC9, Q1LZB5, A2VDR8, Q5BIP4, Q6EWQ7, A1A4L0, Q3T054, Q2KII7, Q2KJ32, A5D7S0, Q5E9E8, A6QQL0, Q3SZB3, Q17QB7, Q08DB5, Q1RMV0, Q17Q51, A5PIZ5, A6H704, Q3ZKL9, Q2KHX3, Q3SZV6, Q3ZL60, Q2KH44, Q3ZC13, Q3ZL63, Q1RMR8, Q3SYW1, Q0V8C2, Q2HIG5, CIJZ67, P52193, Q1RMQ3, Q5E9F1, Q0VDS3, Q0VCT3, A6QLD1, Q17QC5, Q0V8S0, Q3T0U5, A3KN51, Q3SZ87, A4FV54, Q0P5F3, A6QNT8, Q3SZI7, Q148I4, Q3SZI4, Q2KJ81, A6QLL2, A0IN39, A2VEI8, Q2TBS1, Q2HHJ2, Q3T0D2, Q32KV6, P79132, Q3T0D7, P21856, P60519, Q58DS9, Q0V8B7, A2VE21, Q3SYV6, Q02703, Q08DW1 | 1472       | 446      | 8785      | 2.529070299     | 1.15057E-35 | 3.83525E-36 | 6.76786E-36 |
| GOTERM_BP_FAT | GO:0006412-translation                                    | 140   | 6.532897807 | 9.107E-38 | P82670, Q95140, Q3ZBV8, Q58DV0, Q3MICO, A7YV98, Q3T087, Q2KJG3, Q3SZX5, P39872, Q2KHZ2, Q56V99, Q3MHH4, A7MBC5, Q9XS13, Q3SZ65, Q56V11, Q86154, Q3SYU2, A8E4P2, P68103, P68102, P63048, P49410, Q3T003, Q3T0X6, Q3ZBL5, Q5E9B4, Q5EAD6, Q3T102, Q3T099, Q0VC30, A6QLC5, Q3SZ54, Q0HF2, P82931, P61257, Q3T0V9, P82924, Q5E995, Q3T116, Q3T088, Q3T057, Q3T122, Q9T147, A6QPK5, A6QLB1, A6QPK4, A6QPK6, Q148L0, P63009, Q3MHE8, Q3ZCC9, Q1LZB5, A2VDR8, Q5BIP4, Q6EWQ7, A1A4L0, Q3T054, Q2KII7, Q2KJ32, A5D7S0, Q5E9E8, A6QQL0, Q3SZB3, Q17QB7, Q08DB5, Q1RMV0, Q17Q51, A5PIZ5, A6H704, Q3ZKL9, Q2KHX3, Q3SZV6, Q3ZL60, Q2KH44, Q3ZC13, Q3ZL63, Q1RMR8, Q3SYW1, Q0V8C2, Q2HIG5, CIJZ67, P52193, Q1RMQ3, Q5E9F1, Q0VDS3, Q0VCT3, A6QLD1, Q17QC5, Q0V8S0, Q3T0U5, A3KN51, Q3SZ87, A4FV54, Q0P5F3, A6QNT8, Q3SZI7, Q148I4, Q3SZI4, Q2KJ81, A6QLL2, A0IN39, A2VEI8, Q2TBS1, Q2HHJ2, Q3T0D2, Q32KV6, P79132, Q3T0D7, P21856, P60519, Q58DS9, Q0V8B7, A2VE21, Q3SYV6, Q02703, Q08DW1                                                                                                                                                                                                                                                                                                                                                                                                                                                                                                                                                                                          | 1472       | 283      | 8785      | 2.952402443     | 2.79507E-34 | 6.98768E-35 | 1.6441E-34  |
| GOTERM_BP_FAT | GO:0006091-generation of precursor metabolites and energy | 110   | 5.132991134 | 3.2E-32   | Q95KV7, Q5W5U3, Q3ZLG3, P35720, Q6QTC5, A7MBC5, Q3T0G8, P00171, Q0IIG5, Q3B7M9, Q05752, P32876, Q3SZ62, P52505, P23935, P23934, Q0VCM4, Q5E9B1, P10096, A5PJN2, P00157, P33097, Q05B87, Q9XS14, Q3T189, A5P1F9, Q3MHH5, Q3ZC09, O77784, Q05B51, Q3T0P6, P11019, Q9XS33, A2V6I7, P31408, Q2KJES, Q148D3, Q2TBV3, P51404, P13271, P34943, Q85B16, P34942, P31800, Q6QTH0, Q97725, P10575, Q148N0, P00829, P11966, Q01321, P41420, P43494, Q29R11, Q07811, Q04Y14, Q58DR8, Q02365, P23404, P61387, Q3T145, Q0ZT76, P40682, P05631, P05630, Q8HNG5, Q02827, P19858, Q8HXC6, P21282, P17694, P11179, A5D9A7, P20004, P00125, Q95123, P42029, P42028, P13619, A5D984, P15690, Q2KJBG, P00129, Q5E956, Q3SZP5, Q00361, Q3T0E7, Q58D96, Q02380, P13620, P13621, A1A4J1, P00432, P68530, Q02367, Q02366, Q02369, Q02368, A6QLL8, Q02373, P48305, Q02375, Q2KIG0, Q02371, Q0VUC1, Q02372, Q3ZBY4, A7MBC8, Q28852, P25708                                                                                                                                                                                                                                                                                                                                                                                                                                                                                                                                                                                                                                                         | 1472       | 211      | 8785      | 3.111316454     | 9.82124E-29 | 1.96425E-29 | 5.7701E-29  |
| GOTERM_BP_FAT | GO:0046907-intracellular transport                        | 111   | 5.17965469  | 4.737E-20 | Q02399, Q71SS4, Q3SZN2, Q3T087, Q0P5L6, A1A4I8, P53620, Q08DH4, Q24K11, Q3T000, Q2KIU0, Q1JQ98, Q28104, Q2TBH1, P62261, A2VDNS, A7E2Z6, P79345, Q3ZBW4, A7YWD2, Q5E9Y2, Q08DQ1, Q5E9R3, Q3T0F2, Q3ZCH0, Q3ZBT5, A1L567, Q27954, Q0P5N5, P35605, A2VND6, Q3SZD1, P35604, Q3ZBT1, P63103, A5E4N0, P81127, Q32KP9, P53619, Q0VCK5, Q3ZBN8, P41541, A5P1F5, A3KN15, Q3ZPGI, Q0G846, Q5EA68, Q2YDM7, A7MAZ2, Q17QI1, Q5E9L7, Q2T9M1, Q3SWZ3, Q17QI5, A7Z057, Q3ZL81, Q5E971, P49951, Q3ZC32, Q2YDH6, Q2HIE9, Q3SZC1, A4IFL0, A6H712, Q2T9U1, P11023, P23356, A6QLB1, Q86551, P57709, A6QPK4, Q56K10, P63009, Q3MHE8, Q5E9M9, Q1LZB5, A2VDR8, Q5BIP4, Q2TBL9, Q6EWQ7, Q3T054, Q2HIF8, Q2KII7, A5D7S0, Q3SX02, Q1RMV0, Q08DB5, Q3ZKL9, Q3ZC13, Q3SYW1, P52193, CIJZ67, Q5E9F1, Q0VDS3, Q17QC5, Q0V8S0, Q3SZ87, Q3T0M7, A4FV54, A6QNT8, Q2KJ81, Q3SZI4, A6QLL2, A0IN39, A2VEI8, Q2TBS1, Q3T0D7, P60519, Q0V8B7, A2VE21, Q3SYV6, Q02703                                                                                                                                                                                                                                                                                                                                                                                                                                                                                                                                                                                                                                         | 1472       | 281      | 8785      | 2.357494161     | 4.5638E-16  | 2.4228E-17  | 8.55076E-17 |

| Category      | Term                                                           | Count | %           | PValue    | Genes                                                                                                                                                                                                                                                                                                                                                                                                                                                                                                                                                                                                                                                                                                                                                                                                                                                                                                                                                                                                                                                                                                                                                                                                                                                                                                                                                                                        | List Total | PopHits | Pop Total | Fold Enrichment | Bonferroni  | Benjamini   | FDR         |
|---------------|----------------------------------------------------------------|-------|-------------|-----------|----------------------------------------------------------------------------------------------------------------------------------------------------------------------------------------------------------------------------------------------------------------------------------------------------------------------------------------------------------------------------------------------------------------------------------------------------------------------------------------------------------------------------------------------------------------------------------------------------------------------------------------------------------------------------------------------------------------------------------------------------------------------------------------------------------------------------------------------------------------------------------------------------------------------------------------------------------------------------------------------------------------------------------------------------------------------------------------------------------------------------------------------------------------------------------------------------------------------------------------------------------------------------------------------------------------------------------------------------------------------------------------------|------------|---------|-----------|-----------------|-------------|-------------|-------------|
| GOTERM_BP_FAT | GO:005114-oxidation reduction                                  | 167   | 7.792813812 | 1.498E-19 | Q32LG3, Q95KV7, Q3ZBV9, Q2KHZ9, P00366, Q2NL01, Q0P5L5, Q2KJH7, P35720, Q6QTCG, A7MB35, Q3TOGR, P00171, Q2TY96, Q2KIL4, Q05752, Q3ZBE9, P52505, P23935, P23934, Q3ZC14, Q5E9H7, Q3ZBW6, Q5E9B1, P10096, A5PJN2, Q8WVM1, P00157, Q5EAD4, ASD7K0, Q9BG12, Q3SYT8, P16116, Q9BG13, Q9BG11, A5PJF6, Q1UJ10, Q3T189, P41976, Q5E936, A5PJF9, Q3SZD7, Q5E98, P35705, P48818, O77784, Q0P5N4, Q05B51, A7YW54, Q3T067, Q9XSG3, Q7YS70, Q3MHF7, Q1TQW3, Q2KJES, Q2TBV3, Q1RMU3, P13271, Q1UJQ0, Q5E915, Q85BD6, P34943, Q59A28, P34942, Q0IIL6, P31800, Q3T0Z7, Q6QTH1, P52558, Q6QTH0, P31228, Q97725, P10575, Q148N0, A5Q0R7, O77834, Q0P5C2, Q0NC97, P11966, Q01321, Q2H1D7, Q5E9K3, Q0P5H1, Q3TOR4, Q3SZ14, Q3SD31, Q1TQ17, A6QQT4, P04394, A5D9A8, Q07536, Q02365, A6HTH3, P23004, Q3SWY3, P11024, Q3T145, Q0ZTW6, Q3SZ00, Q148L6, A6HTG3, Q8HXG5, P19858, Q02827, Q3SZL4, Q8HXG6, Q3ZL99, Q3ZC42, P17694, P11178, A5D9A7, A4FUFD, Q04614, P00125, Q04615, P21839, P42029, Q95123, Q6B4J2, P42028, P20000, P15690, Q3ZB4, Q08DM3, Q3ZCD7, P00129, P07514, Q17QK8, Q0IIB1, P00442, Q3T0T9, Q02691, Q3ZP5, A6QLM8, Q58DT4, Q0VCN1, Q58D96, Q0NXX6, P48644, Q97764, Q02380, A0IINA3, Q9N2I8, Q17QC2, P00376, Q0VC53, P00435, P00432, Q3ZC12, Q5E947, P68530, Q02367, Q1UPD3, Q02366, Q02369, Q02368, Q3SZ18, Q02373, P48305, Q02375, Q58CW1, Q2KIG0, Q58D08, Q02371, Q02372, Q865R1, Q3ZBY7, P25708 | 1472       | 513     | 8785      | 1.94282222      | 4.59712E-16 | 6.56732E-17 | 2.7041E-16  |
| GOTERM_BP_FAT | GO:0022900-electron transport chain                            | 51    | 2.379841344 | 5.383E-18 | Q95KV7, P35720, P04394, Q6QTCG, Q3TOGR, P00171, Q02365, Q05752, P52505, P23004, P23935, P23934, Q0Z7W6, A5PJN2, Q8HXG5, Q02827, P00157, Q8HXG6, P17694, A5D9A7, P00125, P42029, Q95123, P42028, P15690, Q3T189, P00129, Q05B51, Q2TBV3, Q02380, P13271, Q85BD6, P34943, P34942, P31800, P68530, Q6QTH0, Q02367, Q02366, Q02369, Q02368, Q97725, P10575, Q02373, P48305, Q02375, Q2KIG0, Q02371, Q02372, Q01321, P25708                                                                                                                                                                                                                                                                                                                                                                                                                                                                                                                                                                                                                                                                                                                                                                                                                                                                                                                                                                       | 1472       | 87      | 8785      | 3.498524175     | 1.6519E-14  | 2.06488E-15 | 9.71674E-15 |
| GOTERM_BP_FAT | GO:0016192-vesicle-mediated transport                          | 97    | 4.526364909 | 2.917E-16 | Q2YDD3, Q3SZN2, Q3T086, Q0P5L6, P83939, Q3SZF2, Q5E9Q4, Q0IG7, P53620, Q3TOGR, Q08DZ3, Q5EAB0, Q2TBX8, Q24K11, P61763, Q3T000, Q1UJQ8, Q28104, Q2YD11, A2VDNS, P45478, Q17QF8, Q5E9Y2, Q3T093, Q5E9R3, Q3T0F2, Q27991, Q5E916, Q2KJ37, Q3ZBT5, Q27954, P53605, A2VDK6, Q0IIE8, P53604, A6Q0R46, A8E4N0, P81127, Q0VCX4, P53619, Q0VCX5, P41541, A5PJF5, Q2TQ04, A3K315, Q3ZPCI, A7MAZ2, Q17QI1, Q3SWZ3, Q17QI5, P84081, Q5E9F1, P49951, Q3ZC12, Q2YD16, A4FUC9, P80746, Q3T0C9, Q95114, Q5E9A7, P11023, A6QLB1, Q865S1, P62261, P62261, A6QPK4, P63009, Q3MH8, Q1LZB5, Q3ZBW4, A2VDR8, A7YWD2, Q5B1P4, Q5E9Y2, Q6E9W7, Q3T054, A5D7S0, Q08E63, Q5E9E8, A6HTG2, A7Z057, Q08DB5, A5D7A2, Q3ZKL9, Q3ZC13, Q0V8C2, Q3SYW1, Q0V5D3, A6QLD1, Q17QCS, Q2KJ1A, A4FV54, Q0P5F3, A6QNT8, A5D7R9, Q2KJ81, A0IN38, A5D794, A0IN39, P52174, Q3ZL78, P52175, A2VE18, Q3T0D2, Q3T0D7, P60519, A2VE21, Q3SYV4                                                                                                                                                                                                                                                                                                                                                                                                                                                                                                | 1472       | 254     | 8785      | 2.279145092     | 1.02218E-12 | 1.13576E-13 | 5.9952E-13  |
| GOTERM_BP_FAT | GO:0070727-cellular macromolecule localization                 | 86    | 4.013065796 | 6.788E-16 | Q5E9L7, Q2T9M1, Q02399, Q71SS4, Q3SWZ3, A7Z057, Q3SZN2, Q3ZL81, Q3T087, P49951, Q3ZC32, Q2YD16, A5D7H5, A1A4I8, Q2H1E9, P53620, Q3ZC1, Q08DR9, A4IFL0, Q24K11, Q2T9U1, Q2KIU0, Q1UJQ8, P11023, A6QLB1, Q865S1, P62261, A6QPK4, P63009, Q3MH8, Q1LZB5, Q3ZBW4, A2VDR8, A7YWD2, Q5B1P4, Q5E9Y2, Q6E9W7, Q3T054, Q2KIIT7, A5D7S0, Q3ZCH0, Q3ZBT5, A1L567, Q08DB5, Q1RMV0, Q27954, P53605, Q0P5N5, Q3ZSD1, P35604, Q3ZBT1, Q3ZKL9, Q3ZC13, Q3SYW1, P63103, Q1UJZ67, P52193, Q5E9F1, Q0VCT3, Q17QCS, A8E4N0, Q0V8S0, P81127, Q3SZ87, Q3ZKP9, A6QNT8, Q0VCX4, P53619, Q0VCX5, Q2KJ81, Q3SZ14, A6QLL2, P41541, A0IN39, A2VE18, Q2TBS1, A3KN15, Q3ZPCI, Q3T0D7, Q0V8B7, A2VE21, Q3SYV6, Q0G846, Q02703, Q5E9A8, A7MAZ2                                                                                                                                                                                                                                                                                                                                                                                                                                                                                                                                                                                                                                                                               | 1472       | 215     | 8785      | 2.387228261     | 2.04436E-12 | 2.04392E-13 | 1.19904E-12 |
| GOTERM_BP_FAT | GO:0034613-cellular protein localization                       | 85    | 3.96640224  | 1.56E-15  | Q5E9L7, Q2T9M1, Q02399, Q71SS4, Q3SWZ3, A7Z057, Q3SZN2, Q3ZL81, Q3T087, P49951, Q3ZC32, Q2YD16, A1A4I8, Q2H1E9, P53620, Q3ZC1, Q08DR9, A4IFL0, Q24K11, Q2T9U1, Q2KIU0, Q1UJQ8, P11023, A6QLB1, Q865S1, P62261, A6QPK4, P63009, Q3MH8, Q1LZB5, Q3ZBW4, A2VDR8, A7YWD2, Q5B1P4, Q5E9Y2, Q6E9W7, Q3T054, Q2KIIT7, A5D7S0, Q3ZCH0, Q3ZBT5, A1L567, Q08DB5, Q1RMV0, Q27954, P53605, Q0P5N5, Q3ZSD1, P35604, Q3ZBT1, Q3ZKL9, Q3ZC13, Q3SYW1, P63103, Q1UJZ67, P52193, Q5E9F1, Q0VCT3, Q17QCS, A8E4N0, Q0V8S0, P81127, Q3SZ87, Q3ZKP9, A6QNT8, Q0VCX4, P53619, Q0VCX5, Q2KJ81, Q3SZ14, A6QLL2, P41541, A0IN39, A2VE18, Q2TBS1, A3KN15, Q3ZPCI, Q3T0D7, Q0V8B7, A2VE21, Q3SYV6, Q0G846, Q02703, Q5E9A8, A7MAZ2                                                                                                                                                                                                                                                                                                                                                                                                                                                                                                                                                                                                                                                                                       | 1472       | 214     | 8785      | 2.370495352     | 4.77018E-12 | 4.33653E-13 | 2.80886E-12 |
| GOTERM_BP_FAT | GO:0008886-intracellular protein transport                     | 80    | 3.733084461 | 7.523E-15 | Q5E9L7, Q2T9M1, Q02399, Q71SS4, Q3SWZ3, A7Z057, Q3SZN2, Q3ZL81, Q3T087, P49951, Q3ZC32, Q2YD16, A1A4I8, Q2H1E9, P53620, Q3ZC1, A4IFL0, Q24K11, Q2T9U1, Q2KIU0, Q1UJQ8, P11023, A6QLB1, Q865S1, P62261, A6QPK4, P63009, Q3MH8, Q1LZB5, Q3ZBW4, A2VDR8, A7YWD2, Q5B1P4, Q5E9Y2, Q6E9W7, Q3T054, Q2KIIT7, A5D7S0, Q3ZCH0, Q3ZBT5, A1L567, Q08DB5, Q1RMV0, Q27954, Q0P5N5, P53605, Q3ZSD1, P35604, Q3ZBT1, Q3ZKL9, Q3ZC13, Q3SYW1, P63103, Q1UJZ67, P52193, Q5E9F1, Q17QCS, A8E4N0, Q0V8S0, P81127, Q3SZ87, Q3ZKP9, A6QNT8, P53619, Q0VCX5, Q2KJ81, Q3SZ14, P41541, A0IN39, A2VE18, Q2TBS1, A3KN15, Q3ZPCI, Q3T0D7, Q0V8B7, A2VE21, Q3SYV6, Q0G846, Q5E9A8, A7MAZ2                                                                                                                                                                                                                                                                                                                                                                                                                                                                                                                                                                                                                                                                                                                               | 1472       | 200     | 8785      | 2.387228261     | 2.31695E-11 | 1.93079E-12 | 1.36335E-11 |
| GOTERM_BP_FAT | GO:0051186-cofactor metabolic process                          | 57    | 2.659822678 | 1.567E-14 | Q17QE6, Q32LG3, Q3T186, P35720, Q29RK1, Q58DR8, Q2TY96, Q2KIL4, Q4IU3, Q3ZC14, Q3ZGR, Q3T145, P45478, Q3ZBS0, Q2KJF3, Q05B87, A5D7K0, P11179, A4FUFD, P20004, Q95123, Q24K00, Q6B4J2, Q0P5A2, Q5B1P7, Q3T189, Q3SZD7, Q3MH85, Q2TBG7, P00442, O77784, Q5E956, Q0VCA7, Q2KJN5, Q3ZP16, Q58DK5, Q1UJQ7, Q9XSG3, Q58D96, Q0IIS9, Q148D3, A4FV58, A6QR05, Q2NL34, P00435, Q5E9A2, P22600, Q3ZS38, Q3T131, Q58D49, A5PJL7, Q58CW1, A4FUFD0, Q5E9T4, Q0P5C2, Q0VCU1, Q2H1D7                                                                                                                                                                                                                                                                                                                                                                                                                                                                                                                                                                                                                                                                                                                                                                                                                                                                                                                        | 1472       | 120     | 8785      | 2.83483356      | 4.80426E-11 | 3.6956E-12  | 2.82552E-11 |
| GOTERM_BP_FAT | GO:0045333-cellular respiration                                | 32    | 1.493233784 | 1.486E-13 | Q32LG3, Q3MHX5, O77784, P35720, Q6QTCG, Q29RK1, Q3TOGR, Q9XSG3, Q58D96, Q58DR8, Q148D3, Q05752, P52505, P23935, Q3T145, Q85BD6, P31800, P00432, P00157, Q02827, P68530, Q6QTH0, Q05B87, P11179, Q02375, P20004, Q95123, Q0VCU1, Q02372, P15690, Q3T189, P00129                                                                                                                                                                                                                                                                                                                                                                                                                                                                                                                                                                                                                                                                                                                                                                                                                                                                                                                                                                                                                                                                                                                               | 1472       | 48      | 8785      | 3.978713768     | 4.55893E-10 | 3.25638E-11 | 2.68163E-10 |
| GOTERM_BP_FAT | GO:0015980-energy derivation by oxidation of organic compounds | 39    | 1.819878675 | 3.908E-13 | Q32LG3, Q3MHX5, O77784, P35720, Q6QTCG, Q29RK1, Q9XSG3, Q3TOGR, Q3T0E7, Q9MYM4, Q58D96, Q58DR8, Q148D3, Q3B7M9, Q05752, P52505, P61287, P23935, Q3T145, Q85BD6, Q0VCM4, P31800, P00432, P00157, Q02827, P68530, Q6QTH0, P33097, Q05B87, P11179, Q02375, P20004, Q95123, Q0VCU1, Q02372, P15690, A7MB78, Q3T189, P00129                                                                                                                                                                                                                                                                                                                                                                                                                                                                                                                                                                                                                                                                                                                                                                                                                                                                                                                                                                                                                                                                       | 1472       | 69      | 8785      | 3.373257325     | 1.19936E-09 | 7.99574E-11 | 7.0548E-10  |
| GOTERM_BP_FAT | GO:0006457-protein folding                                     | 54    | 2.519832011 | 8.285E-13 | Q2TB4, Q3ZKS0, A1A4M8, Q3MHL7, P30404, P61603, Q3ZC1, Q3ZBA6, Q3T0K2, Q3ZC9, Q2TBX2, P19120, Q0P5D0, Q8HY19, Q2KJCS, A7Z066, Q2H194, A5PJN2, Q3ZBH0, Q3SYT6, P48427, Q3ZCH0, A1A4P5, Q3SZ99, Q5E992, A5PK75, P80311, Q5E954, Q0P5N5, Q5E951, Q3ZPA9, Q0IIM3, Q3ZLMO, Q3M100, Q29455, Q17Q89, P52193, P26884, Q0IIE8, Q3ZP97, Q95M18, P26882, Q9TRY0, Q76LV1, Q3ZSE9, Q3ZSE2, Q76LV2, P62955, Q5BINS, A6QLT9, Q3T0L2, Q0G846, P18203, A1A4I9                                                                                                                                                                                                                                                                                                                                                                                                                                                                                                                                                                                                                                                                                                                                                                                                                                                                                                                                                  | 1472       | 119     | 8785      | 2.708200128     | 2.54251E-09 | 1.58907E-10 | 1.49555E-09 |
| GOTERM_BP_FAT | GO:0044265-cellular macromolecule catabolic process            | 95    | 4.433037797 | 2.149E-11 | Q9XT96, Q1RMX2, Q0VCL3, Q71SS4, A6QR55, Q2YDD2, Q3SX24, A1L506, Q3ZBV3, Q0VCP5, A7MB15, Q2KJG2, Q29RK4, A5D7H5, Q58DR8, Q2TBX8, Q0V3D1, A3K3M5, Q2H1E4, P56541, Q41515, A3K3M3, Q3ZC2, P23356, Q58CZ0, Q3T0X5, P45478, P33672, Q3T102, Q0IIF7, Q3T108, Q0P594, Q9XSJ0, Q2KIH4, Q0VC37, Q29463, Q2TBG8, Q3ZS22, Q2NL22, Q08DY9, Q3MHN0, Q58DU05, Q5E9K0, Q3MHX6, Q0IIM6, A3KN22, A6QNM7, Q3ZKL2, A1A4K3, P00442, Q3T0Y5, Q3ZPA5, Q5E953, Q0P568, Q2T987, Q3ZBT1, Q3ZCR9, P62194, Q3T112, Q58DG6, Q3SZ43, Q3ZBG0, P38447, Q3ZPF3, Q5E916, P61955, Q1RMU2, A6HT44, Q2KIL6, Q5E9F9, Q10701, Q95M18, Q5E987, A6QPH1, A4FV7, Q8M1J7, A4FV12, Q3T168, Q0P5K3, Q1RMW1, A2VE14, Q2TQZ3, A2VDP1, Q3ZLN1, P61085, Q2KIK0, Q5ZCF7, A2VE20, Q3ZPC3, Q3ZCF3, Q59HJ6, Q02703, Q08DE9, Q1LZE1, A2VEA3                                                                                                                                                                                                                                                                                                                                                                                                                                                                                                                                                                                                        | 1472       | 290     | 8785      | 1.955057627     | 6.59604E-08 | 3.88002E-09 | 3.87989E-08 |

| Category      | Term                                                                  | Count | %           | PValue    | Genes                                                                                                                                                                                                                                                                                                                                                                                                                                                                                                                                                                                                                                                                                                                                                                                                                                                                                                                                                                                                                                                                                                                                      | List Total | Pop Hits | Pop Total | Fold Enrichment | Bonferroni  | Benjamini   | FDR         |
|---------------|-----------------------------------------------------------------------|-------|-------------|-----------|--------------------------------------------------------------------------------------------------------------------------------------------------------------------------------------------------------------------------------------------------------------------------------------------------------------------------------------------------------------------------------------------------------------------------------------------------------------------------------------------------------------------------------------------------------------------------------------------------------------------------------------------------------------------------------------------------------------------------------------------------------------------------------------------------------------------------------------------------------------------------------------------------------------------------------------------------------------------------------------------------------------------------------------------------------------------------------------------------------------------------------------------|------------|----------|-----------|-----------------|-------------|-------------|-------------|
| GOTERM_BP_FAT | GO:0009057-macromolecul catabolic process                             | 103   | 4.806346244 | 3.785E-11 | Q0VCL3, Q02399, Q71SS4, Q2YDD2, Q3ZBV3, A7MBJ5, Q2KJG2, Q2T8X8, O41515, P56541, A3KMY5, A3KMY3, Q3T0X5, P45478, A7E2Z6, Q3T102, Q2KJH7, Q0IIF7, Q3T108, Q0P594, Q9XSJ0, Q0VC37, A6QR14, Q2TBGR, A6QR12, Q2N122, Q3S252, Q0R8Y9, Q5SDU5, Q5E9K0, Q3MHX6, Q0IIM6, A3KN22, Q3T0Y5, Q3ZBT1, Q2T9S7, P62194, Q3T112, Q5SDG6, Q3SZ43, Q3ZBG0, Q3ZPF3, Q5E9I6, P61955, Q1RMMU2, A6H744, Q2KJH6, Q10741, Q95M18, A4IFN7, A6QPH1, Q5E987, A4FV12, Q3T0Z3, P61085, Q2KIK0, Q3ZCF7, Q3ZPC3, Q3ZCF3, Q0RDE9, Q1LZE1, Q9XT96, Q1RMMX2, A6QR55, Q3SX24, A1L506, Q0VCP5, Q29R9K4, Q2TBX8, Q0VD31, A3KMY5, Q2HJ6, O41515, A3KMY3, P23356, Q3SZC2, Q3T0X5, P45478, P33672, Q0IIF7, Q3T108, Q0P594, Q9XSJ0, Q2KJH4, Q29463, Q2TBGR, Q3SZ52, Q5SDU5, Q3MHN0, Q5E9K0, Q3MHX6, Q0IIM6, A3KN22, A6QNM7, Q3ZKL2, A1A4K3, Q3T0Y5, Q3ZPA5, Q5E953, Q0P568, Q3ZBT1, Q2T9S7, P62194, Q3ZCK9, Q3T112, Q5SDG6, Q3SZ43, Q3ZBG0, Q3ZPF3, Q5E9I6, P61955, Q1RMMU2, A6H744, Q2KJH6, Q5E9F9, Q10741, Q95M18, Q5E987, A4IFN7, A4FV12, Q3T168, Q0P5K3, Q1RMMW1, A2VE14, Q3TOZ3, A2VDP1, Q3ZLN1, P61085, Q2KIK0, Q3ZCF7, A2VE20, Q3ZPG3, Q3ZCF3, Q59HJ6, Q0RDE9, Q1LZE1, A2VEA3 | 1472       | 327      | 8785      | 1.879851001     | 1.16151E-07 | 6.45285E-09 | 6.8322E-08  |
| GOTERM_BP_FAT | GO:0007005-mitochondrion organization                                 | 35    | 1.633224452 | 3.829E-10 | Q0IIB7, Q0VCA3, Q1RMMV0, P35705, Q3ZL81, A6QNM2, Q0P5N5, A0INK3, Q3ZLMO, Q3ZLE4, Q3TOG8, Q2HJ2, Q3SZC1, Q3MHH7, A5D9D4, P11023, Q5E9H5, P82922, Q0P5F4, A6QPI6, P00435, A7E2Z6, Q8WMMV3, A6QLL2, Q1LZB5, Q0VC36, Q2T8S1, Q76LV2, Q05B87, Q02375, P42028, Q0G846, Q02703, Q0R8D9, A4FUH5, Q3ZB33                                                                                                                                                                                                                                                                                                                                                                                                                                                                                                                                                                                                                                                                                                                                                                                                                                            | 1472       | 69       | 8785      | 3.027282215     | 1.17504E-06 | 6.18445E-08 | 6.9118E-07  |
| GOTERM_BP_FAT | GO:0048193-Golgi vesicle transport                                    | 22    | 1.026598227 | 2.019E-09 | A2VDN5, Q17QH1, P53619, Q17Q15, Q27954, Q3SZN2, A5P165, Q5E971, A2VDR8, P35605, P35604, Q0P5L6, Q3ZC32, A2VE18, Q2TBL9, P53620, P60519, Q3TOF2, Q3T000, A4FV54, Q28104, A6QNT8                                                                                                                                                                                                                                                                                                                                                                                                                                                                                                                                                                                                                                                                                                                                                                                                                                                                                                                                                             | 1472       | 33       | 8785      | 3.978713768     | 6.19713E-06 | 3.09857E-07 | 3.64526E-06 |
| GOTERM_BP_FAT | GO:0044257-cellular protein catabolic process                         | 80    | 3.733084461 | 2.23E-09  | Q9XT96, Q1RMMX2, Q0VCL3, Q71SS4, A6QR55, Q3SX24, A1L506, Q0VCP5, A7MBJ5, Q2KJG2, Q29R9K4, Q2TBX8, Q0VD31, A3KMY5, Q2HJ6, O41515, A3KMY3, P23356, Q3SZC2, Q3T0X5, P45478, P33672, Q0IIF7, Q3T108, Q0P594, Q9XSJ0, Q2KJH4, Q29463, Q2TBGR, Q3SZ52, Q5SDU5, Q3MHN0, Q5E9K0, Q3MHX6, Q0IIM6, A3KN22, A6QNM7, Q3ZKL2, A1A4K3, Q3T0Y5, Q3ZPA5, Q5E953, Q0P568, Q3ZBT1, Q2T9S7, P62194, Q3ZCK9, Q3T112, Q5SDG6, Q3SZ43, Q3ZBG0, Q3ZPF3, Q5E9I6, P61955, Q1RMMU2, A6H744, Q2KJH6, Q5E9F9, Q10741, Q95M18, Q5E987, A4IFN7, A4FV12, Q3T168, Q0P5K3, Q1RMMW1, A2VE14, Q3TOZ3, A2VDP1, Q3ZLN1, P61085, Q2KIK0, Q3ZCF7, A2VE20, Q3ZPG3, Q3ZCF3, Q59HJ6, Q0RDE9, Q1LZE1, A2VEA3                                                                                                                                                                                                                                                                                                                                                                                                                                                                          | 1472       | 248      | 8785      | 1.925184081     | 6.84486E-06 | 3.25947E-07 | 4.02627E-06 |
| GOTERM_BP_FAT | GO:0006732-coenzyme metabolic process                                 | 41    | 1.913205786 | 2.794E-09 | Q3ZLG3, Q3MHX5, Q3T186, P00442, O77784, Q5E956, Q0VCA7, P35720, Q29R9K1, Q9XSJ3, Q1JQD7, Q5SDG6, Q0IIF5, Q5SDR8, Q2T9Y6, Q148D3, Q2KJL4, Q4JH3, A6QR05, Q2NL34, Q3ZC14, Q3T145, P00435, Q3ZBS0, Q5EAC2, P11179, Q3ZS38, Q3T131, A4FUF0, A5PIL7, P20004, Q58CW1, Q95123, A4FUD0, Q5E9T4, Q0P5C2, Q0VCU1, Q5BIP7, Q0P5A2, Q3T189, Q2HJ27                                                                                                                                                                                                                                                                                                                                                                                                                                                                                                                                                                                                                                                                                                                                                                                                     | 1472       | 94       | 8785      | 2.603094646     | 8.57466E-06 | 3.89759E-07 | 5.04377E-06 |
| GOTERM_BP_FAT | GO:0030163-protein catabolic process                                  | 84    | 3.919738684 | 3.906E-09 | Q9XT96, Q1RMMX2, Q0VCL3, Q71SS4, A6QR55, Q3SX24, A1L506, Q0VCP5, A7MBJ5, Q2KJG2, Q29R9K4, Q2TBX8, Q0VD31, A3KMY5, Q2HJ6, O41515, A3KMY3, P23356, Q3SZC2, Q3T0X5, P45478, P33672, A7E2Z6, Q2KJH7, Q0IIF7, Q3T108, Q0P594, Q9XSJ0, Q2KJH4, Q0E863, Q29463, Q2TBGR, A6QR12, Q3SZ52, Q3MHN0, Q5SDU5, Q5E9K0, Q3MHX6, Q0IIM6, A3KN22, A6QNM7, Q3ZKL2, A1A4K3, Q3T0Y5, Q3ZPA5, Q5E953, Q0P568, Q3ZBT1, Q2T9S7, P62194, Q3ZCK9, Q3T112, Q5SDG6, Q3SZ43, Q3ZBG0, Q3ZPF3, Q5E9I6, P61955, Q1RMMU2, A6H744, Q2KJH6, Q5E9F9, Q10741, Q95M18, Q5E987, A4IFN7, A4FV12, Q3T168, Q0P5K3, Q1RMMW1, A2VE14, Q3TOZ3, A2VDP1, Q3ZLN1, P61085, Q2KIK0, Q3ZCF7, A2VE20, Q3ZPG3, Q3ZCF3, Q59HJ6, Q0RDE9, Q1LZE1, A2VEA3                                                                                                                                                                                                                                                                                                                                                                                                                                          | 1472       | 268      | 8785      | 1.870589309     | 1.19865E-05 | 5.21157E-07 | 7.08071E-06 |
| GOTERM_BP_FAT | GO:0051603-proteolysis involved in cellular protein catabolic process | 79    | 3.686420905 | 4.394E-09 | Q9XT96, Q1RMMX2, Q0VCL3, Q71SS4, A6QR55, Q3SX24, A1L506, Q0VCP5, A7MBJ5, Q2KJG2, Q29R9K4, Q2TBX8, Q0VD31, A3KMY5, Q2HJ6, O41515, A3KMY3, P23356, Q3SZC2, Q3T0X5, P33672, Q0IIF7, Q3T108, Q0P594, Q9XSJ0, Q2KJH4, Q29463, Q2TBGR, Q3SZ52, Q5SDU5, Q3MHN0, Q5E9K0, Q3MHX6, Q0IIM6, A3KN22, A6QNM7, Q3ZKL2, A1A4K3, Q3T0Y5, Q3ZPA5, Q5E953, Q0P568, Q3ZBT1, Q2T9S7, P62194, Q3ZCK9, Q3T112, Q5SDG6, Q3SZ43, Q3ZBG0, Q3ZPF3, Q5E9I6, P61955, Q1RMMU2, A6H744, Q2KJH6, Q5E9F9, Q10741, Q95M18, Q5E987, A4IFN7, A4FV12, Q3T168, Q0P5K3, Q1RMMW1, A2VE14, Q3TOZ3, A2VDP1, Q3ZLN1, P61085, Q2KIK0, Q3ZCF7, A2VE20, Q3ZPG3, Q3ZCF3, Q59HJ6, Q0RDE9, Q1LZE1, A2VEA3                                                                                                                                                                                                                                                                                                                                                                                                                                                                                  | 1472       | 247      | 8785      | 1.908816112     | 1.34843E-05 | 5.6185E-07  | 7.93173E-06 |
| GOTERM_BP_FAT | GO:0006007-glucose catabolic process                                  | 26    | 1.21325245  | 6.184E-09 | A5PIF9, Q3ZLG3, Q5W5U3, Q3T186, Q3ZC09, Q5E956, Q3T0P6, A7MB35, A2VE47, Q0IIG5, Q2KJES, Q3SZ62, Q3ZC14, Q3T145, P10096, Q5E9B1, A1A4J1, P19858, A6QLL8, Q148N0, A4FUF0, Q9XSJ4, Q3ZBY4, A5D984, P11966, Q2HJ27                                                                                                                                                                                                                                                                                                                                                                                                                                                                                                                                                                                                                                                                                                                                                                                                                                                                                                                             | 1472       | 46       | 8785      | 3.373257325     | 1.89782E-05 | 7.59135E-07 | 1.11634E-05 |
| GOTERM_BP_FAT | GO:0019320-hexose catabolic process                                   | 26    | 1.21325245  | 1.112E-08 | A5PIF9, Q3ZLG3, Q5W5U3, Q3T186, Q3ZC09, Q5E956, Q3T0P6, A7MB35, A2VE47, Q0IIG5, Q2KJES, Q3SZ62, Q3ZC14, Q3T145, P10096, Q5E9B1, A1A4J1, P19858, A6QLL8, Q148N0, A4FUF0, Q9XSJ4, Q3ZBY4, A5D984, P11966, Q2HJ27                                                                                                                                                                                                                                                                                                                                                                                                                                                                                                                                                                                                                                                                                                                                                                                                                                                                                                                             | 1472       | 47       | 8785      | 3.301485893     | 3.41376E-05 | 1.31301E-06 | 2.00806E-05 |
| GOTERM_BP_FAT | GO:0004636-monosaccharide catabolic process                           | 26    | 1.21325245  | 1.955E-08 | A5PIF9, Q3ZLG3, Q5W5U3, Q3T186, Q3ZC09, Q5E956, Q3T0P6, A7MB35, A2VE47, Q0IIG5, Q2KJES, Q3SZ62, Q3ZC14, Q3T145, P10096, Q5E9B1, A1A4J1, P19858, A6QLL8, Q148N0, A4FUF0, Q9XSJ4, Q3ZBY4, A5D984, P11966, Q2HJ27                                                                                                                                                                                                                                                                                                                                                                                                                                                                                                                                                                                                                                                                                                                                                                                                                                                                                                                             | 1472       | 48       | 8785      | 3.232704937     | 5.99888E-05 | 2.22187E-06 | 3.52874E-05 |
| GOTERM_BP_FAT | GO:0043039-rRNA aminoacylation                                        | 23    | 1.073261783 | 2.031E-08 | A6QNM8, Q3ZBV8, A7YW98, Q3T099, A6H7E1, Q2KJG3, Q0VC30, A5D7A2, Q2KJ84, A4FUC8, Q2KJF8, Q3MHH4, A7MB35, A6QLT9, A7MBD4, Q3ZLK1, A6QLR2, A5D7G0, Q2T9L8, A8E4P2, Q0P5H7, Q9GMB8, P17248                                                                                                                                                                                                                                                                                                                                                                                                                                                                                                                                                                                                                                                                                                                                                                                                                                                                                                                                                     | 1472       | 39       | 8785      | 3.51963141      | 6.23312E-05 | 2.22618E-06 | 3.66653E-05 |
| GOTERM_BP_FAT | GO:0006418-rRNA aminoacylation for protein translation                | 23    | 1.073261783 | 2.031E-08 | A6QNM8, Q3ZBV8, A7YW98, Q3T099, A6H7E1, Q2KJG3, Q0VC30, A5D7A2, Q2KJ84, A4FUC8, Q2KJF8, Q3MHH4, A7MB35, A6QLT9, A7MBD4, Q3ZLK1, A6QLR2, A5D7G0, Q2T9L8, A8E4P2, Q0P5H7, Q9GMB8, P17248                                                                                                                                                                                                                                                                                                                                                                                                                                                                                                                                                                                                                                                                                                                                                                                                                                                                                                                                                     | 1472       | 39       | 8785      | 3.51963141      | 6.23312E-05 | 2.22618E-06 | 3.66653E-05 |
| GOTERM_BP_FAT | GO:0043038-amino acid activation                                      | 23    | 1.073261783 | 2.031E-08 | A6QNM8, Q3ZBV8, A7YW98, Q3T099, A6H7E1, Q2KJG3, Q0VC30, A5D7A2, Q2KJ84, A4FUC8, Q2KJF8, Q3MHH4, A7MB35, A6QLT9, A7MBD4, Q3ZLK1, A6QLR2, A5D7G0, Q2T9L8, A8E4P2, Q0P5H7, Q9GMB8, P17248                                                                                                                                                                                                                                                                                                                                                                                                                                                                                                                                                                                                                                                                                                                                                                                                                                                                                                                                                     | 1472       | 39       | 8785      | 3.51963141      | 6.23312E-05 | 2.22618E-06 | 3.66653E-05 |
| GOTERM_BP_FAT | GO:0007264-small GTPase mediated signal transduction                  | 59    | 2.75314979  | 2.055E-08 | Q17QU4, P84081, Q5E9C0, Q2KJ13, Q3SZF2, Q0IIG8, P19803, Q3ZLJ2, Q0IIG7, A6QLS9, A4IFU2, Q3SWY9, P11023, A6QLB1, P62598, Q5E9M9, Q2TBH7, A4IFP7, P10948, A7YY55, Q3T0F5, Q1RMI2, Q2HJF8, Q17R06, P61585, A4HG7C, Q1RMR4, Q17QB7, Q5E9I6, Q0IIM6, Q2KJ93, Q3ZCR2, A2VDR6, Q0IIM2, A5D7A4, A5D977, A6QR46, Q3ZBG1, Q0VCA4, A4FV54, A5D7R9, P61223, P62833, Q3ZA6, Q148J4, Q3SZ14, Q2KJ07, Q5SDW6, Q2HJH2, P50397, Q3MHP2, A5PKL2, P21856, Q5SDS9, P19035, Q2YDM1, Q2TA37, Q0RDI5, Q0R8D1                                                                                                                                                                                                                                                                                                                                                                                                                                                                                                                                                                                                                                                      | 1472       | 170      | 8785      | 2.071271579     | 6.30574E-05 | 2.17446E-06 | 3.70925E-05 |
| GOTERM_BP_FAT | GO:0044275-cellular carbohydrate catabolic process                    | 28    | 1.306579561 | 2.752E-08 | A5PIF9, Q3ZLG3, Q5W5U3, Q3T186, Q3ZC09, Q5E956, Q3T0P6, A7MB35, A2VE47, Q0IIG5, Q2KJES, Q3SZ62, Q3ZC14, Q3T145, P10096, Q5E9B1, A1A4J1, P19858, A6QLL8, Q148N0, A4FUF0, A6QQR7, Q9XSJ4, Q3ZBY4, A5D984, P11966, Q2HJ27                                                                                                                                                                                                                                                                                                                                                                                                                                                                                                                                                                                                                                                                                                                                                                                                                                                                                                                     | 1472       | 55       | 8785      | 3.038290514     | 8.44538E-05 | 2.81524E-06 | 4.96791E-05 |
| GOTERM_BP_FAT | GO:0044271-nitrogen compound biosynthetic process                     | 75    | 3.499766682 | 6.04E-08  | Q5EA40, Q2HJ58, A7E3T7, Q2KJH7, A4IFQ7, Q97681, Q3TOG8, Q3TOC6, Q59A32, P32876, Q4HJ3, Q3SWY3, Q3SZ10, Q1RMS2, P57709, P40682, P05631, Q05927, P05630, Q0VD27, Q2KHU0, P33097, P21282, A2VDS0, P13619, Q2KJH6, Q3ZBD3, A0INB9, Q17QK8, A5PK70, Q00361, A6H7F4, Q2KJN5, P11019, A7YV4E, P12344, Q5SDK5, Q1LZA3, Q1JQD7, Q5SDT4, P31408, P31404, Q2KJW9, A0INA3, P31754, Q3SZ18, Q3ZA5, P00376, P13620, P13621, Q2NL31, Q5SDW2, Q0RDA1, Q5SDL1, P22027, Q2TA32, Q0VC0K, Q3TOZ7, Q2HJ26, P52174, P52175, Q3TOQ4, Q8MKF1, P22600, Q0VC13, Q56W4, Q5SD49, A0IN4, Q0VCY0, Q5E9T4, P56658, Q5SD08, Q28851, P00829, P61420, Q28852, Q0R8D2                                                                                                                                                                                                                                                                                                                                                                                                                                                                                                         | 1472       | 243      | 8785      | 1.841997115     | 0.000185349 | 5.97955E-06 | 0.000109035 |
| GOTERM_BP_FAT | GO:0006119-oxidative phosphorylation                                  | 29    | 1.353243117 | 6.144E-08 | Q00361, Q6QTG5, P11019, Q97681, Q3TOG8, P31408, P32876, Q50752, P31404, P52505, P13620, P13621, Q85BD6, P40682, P05631, P31800, P05630, Q02827, Q6QT40, Q05B87, P21282, P13619, Q02372, P15690, Q2KJH6, P00829, Q28852, P61420, P00129                                                                                                                                                                                                                                                                                                                                                                                                                                                                                                                                                                                                                                                                                                                                                                                                                                                                                                     | 1472       | 60       | 8785      | 2.884567482     | 0.000188545 | 5.89256E-06 | 0.000109115 |
| GOTERM_BP_FAT | GO:0006096-glycolysis                                                 | 22    | 1.026598227 | 6.964E-08 | Q3T145, A5PIF9, Q3ZLG3, Q5W5U3, P10096, Q5E9B1, A1A4J1, Q3ZC09, Q5E956, P19858, Q3T0P6, A6QLL8, A7MB35, Q148N0, A2VE47, Q0IIG5, Q2KJES, Q9XSJ4, Q3ZBY4, A5D984, Q3SZ62, P11966                                                                                                                                                                                                                                                                                                                                                                                                                                                                                                                                                                                                                                                                                                                                                                                                                                                                                                                                                             | 1472       | 38       | 8785      | 3.455198799     | 0.000213713 | 6.47684E-06 | 0.000125723 |
| GOTERM_BP_FAT | GO:0016052-carbohydrate catabolic process                             | 30    | 1.399906673 | 1.221E-07 | A5PIF9, Q3ZLG3, Q5W5U3, Q3T186, Q3ZC09, Q5E956, Q3T0P6, A7MB35, A2VE47, Q0IIG5, Q2KJES, Q5EA84, Q2KJES, Q3SZ62, Q3ZC14, Q3T145, Q5E9B1, P10096, A1A4J1, Q3ZC12, P19858, A6QLL8, Q148N0, A4FUF0, A6QQR7, Q9XSJ4, Q3ZBY4, A5D984, P11966, Q2HJ27                                                                                                                                                                                                                                                                                                                                                                                                                                                                                                                                                                                                                                                                                                                                                                                                                                                                                             | 1472       | 65       | 8785      | 2.754494147     | 0.000374784 | 1.10251E-05 | 0.000220495 |

| Category      | Term                                                          | Count | %           | PValue    | Genes                                                                                                                                                                                                                                                                                                                                                                                                                                                                                                                                                                         | List Total | PopHits | PopTotal | Fold Enrichment | Bonferroni  | Benjamini   | FDR         |
|---------------|---------------------------------------------------------------|-------|-------------|-----------|-------------------------------------------------------------------------------------------------------------------------------------------------------------------------------------------------------------------------------------------------------------------------------------------------------------------------------------------------------------------------------------------------------------------------------------------------------------------------------------------------------------------------------------------------------------------------------|------------|---------|----------|-----------------|-------------|-------------|-------------|
| GOTERM_BP_FAT | GO:0043632-modification-independent protein catabolic process | 70    | 3.266448903 | 1.519E-07 | Q1RMX2, Q0VCL3, Q71SS4, A6QR55, Q3SX24, A1L506, Q0VCP5, A7MBJ5, Q2KJG2, Q29RK4, Q2TBX8, Q0VD31, A3KMY5, O41515, Q2HJ4, A3KMY3, P23356, Q3T0X5, Q0IIF7, Q0P594, Q9XSJ0, Q2KJH4, Q2TBG8, Q3SZ52, Q8SDU5, Q3MHX6, Q0IIM6, A3KN22, A6QNM7, Q32KL2, A1A4K3, Q3T0Y5, Q3ZPA5, Q5E953, Q3ZBT1, Q2T9S7, Q0P568, P62194, Q3ZCK9, Q5SDC6, Q3SZ43, Q3ZBQ3, Q3ZPF3, Q5E9J6, P61955, Q1RMU2, A6H744, Q2KJG6, Q5E9F9, Q95M18, Q5E987, A4IFN7, A4FV12, Q3T168, Q0P5K3, Q1RMW1, A2VEI4, Q3T0Z3, A2VDP1, Q32LN1, P61085, Q2KIK0, Q3ZCF7, A2VE20, Q32PG3, Q3ZCF3, Q59HJ6, Q0RDE9, Q1LZE1, A2VEA3 | 1472       | 226     | 8785     | 1.848517459     | 0.000465959 | 1.33161E-05 | 0.000274148 |
| GOTERM_BP_FAT | GO:0019941-modification-independent protein catabolic process | 70    | 3.266448903 | 1.519E-07 | Q1RMX2, Q0VCL3, Q71SS4, A6QR55, Q3SX24, A1L506, Q0VCP5, A7MBJ5, Q2KJG2, Q29RK4, Q2TBX8, Q0VD31, A3KMY5, O41515, Q2HJ4, A3KMY3, P23356, Q3T0X5, Q0IIF7, Q0P594, Q9XSJ0, Q2KJH4, Q2TBG8, Q3SZ52, Q8SDU5, Q3MHX6, Q0IIM6, A3KN22, A6QNM7, Q32KL2, A1A4K3, Q3T0Y5, Q3ZPA5, Q5E953, Q3ZBT1, Q2T9S7, Q0P568, P62194, Q3ZCK9, Q5SDC6, Q3SZ43, Q3ZBQ3, Q3ZPF3, Q5E9J6, P61955, Q1RMU2, A6H744, Q2KJG6, Q5E9F9, Q95M18, Q5E987, A4IFN7, A4FV12, Q3T168, Q0P5K3, Q1RMW1, A2VEI4, Q3T0Z3, A2VDP1, Q32LN1, P61085, Q2KIK0, Q3ZCF7, A2VE20, Q32PG3, Q3ZCF3, Q59HJ6, Q0RDE9, Q1LZE1, A2VEA3 | 1472       | 226     | 8785     | 1.848517459     | 0.000465959 | 1.33161E-05 | 0.000274148 |
| GOTERM_BP_FAT | GO:0009060-aerobic respiration                                | 17    | 0.793280448 | 1.587E-07 | Q3T145, Q3MHX5, Q32LG3, P00432, O77784, P35720, Q29RK1, Q05B87, Q9XSG3, P11179, Q5SD96, Q5SDR8, P20004, Q148D3, Q95123, Q0VCU1, Q3T189                                                                                                                                                                                                                                                                                                                                                                                                                                        | 1472       | 25      | 8785     | 4.058288043     | 0.000486881 | 1.35277E-05 | 0.00028646  |
| GOTERM_BP_FAT | GO:0006099-tricarboxylic acid cycle                           | 15    | 0.699953336 | 1.828E-07 | Q3T145, Q3MHX5, Q32LG3, O77784, P35720, Q29RK1, P11179, Q9XSG3, Q5SD96, Q5SDR8, P20004, Q148D3, Q95123, Q0VCU1, Q3T189                                                                                                                                                                                                                                                                                                                                                                                                                                                        | 1472       | 20      | 8785     | 4.476052989     | 0.000560914 | 1.5164E-05  | 0.00033003  |
| GOTERM_BP_FAT | GO:0046356-acetyl-CoA catabolic process                       | 15    | 0.699953336 | 1.828E-07 | Q3T145, Q3MHX5, Q32LG3, O77784, P35720, Q29RK1, P11179, Q9XSG3, Q5SD96, Q5SDR8, P20004, Q148D3, Q95123, Q0VCU1, Q3T189                                                                                                                                                                                                                                                                                                                                                                                                                                                        | 1472       | 20      | 8785     | 4.476052989     | 0.000560914 | 1.5164E-05  | 0.00033003  |
| GOTERM_BP_FAT | GO:0051188-cofactor biosynthetic process                      | 29    | 1.353243117 | 2.224E-07 | Q170E6, Q2TBG7, Q2KIN5, Q32P16, Q5SDK5, Q1QD7, Q0I59, Q2T9Y6, Q2KILA, Q4IJJ3, A4FV51, A6QR05, Q2NL34, Q3SZG8, Q3ZB80, Q3ZKJ3, Q5EA62, P22600, Q05B87, Q3T131, Q3ZS38, Q8SD49, Q58CW1, A4FUD0, Q5E9T4, Q0P5C2, Q24K00, Q0P5A2, Q5BIP7                                                                                                                                                                                                                                                                                                                                          | 1472       | 63      | 8785     | 2.747207126     | 0.000682205 | 1.79587E-05 | 0.000401419 |
| GOTERM_BP_FAT | GO:0006084-acetyl-CoA metabolic process                       | 15    | 0.699953336 | 4.638E-07 | Q3T145, Q3MHX5, Q32LG3, O77784, P35720, Q29RK1, P11179, Q9XSG3, Q5SD96, Q5SDR8, P20004, Q148D3, Q95123, Q0VCU1, Q3T189                                                                                                                                                                                                                                                                                                                                                                                                                                                        | 1472       | 21      | 8785     | 4.262907609     | 0.00142242  | 3.64976E-05 | 0.000837281 |
| GOTERM_BP_FAT | GO:0004616-alcohol metabolic process                          | 27    | 1.259916006 | 4.887E-07 | A5PIF9, Q32LG3, Q5W5U3, Q3T186, Q3ZC09, Q5E956, Q3T0P6, A7MB35, A2VE47, Q0IIG5, Q2KJES, Q3SZ62, Q3ZC14, Q3T145, P10096, Q5E9B1, A1A4J1, P19858, A6QLL8, Q148N0, A4FUF0, A6QOR7, Q9XSJ4, Q3ZBY4, A5D984, P11966, Q2HJ7                                                                                                                                                                                                                                                                                                                                                         | 1472       | 58      | 8785     | 2.778239786     | 0.001498589 | 3.74921E-05 | 0.00088215  |
| GOTERM_BP_FAT | GO:0006511-ubiquitin-dependent protein catabolic process      | 37    | 1.726551563 | 7.713E-07 | Q3MHX6, Q1RMX2, Q0IIM6, Q71SS4, A6QNM7, Q32KL2, A6QR55, A1A4K3, Q3SX24, Q3T0Y5, A1L506, Q0VCP5, Q0P568, P62194, Q3ZCK9, Q5SDC6, Q3SZ43, Q3ZBQ3, Q3ZPF3, Q5E9J6, P61955, Q1RMU2, A6H744, Q2KJG6, Q5E9F9, Q95M18, Q3T0X5, Q5E987, Q0P5K3, A2VDP1, Q0IIF7, Q0P594, Q9XSJ0, Q3ZCF7, Q2KJH4, Q3ZCF3, Q2TBG8, Q0RDE9, A2VEA3, Q8SDU5                                                                                                                                                                                                                                                | 1472       | 96      | 8785     | 2.300193897     | 0.002364454 | 5.77362E-05 | 0.001392446 |
| GOTERM_BP_FAT | GO:0005996-monosaccharide metabolic process                   | 44    | 2.053196454 | 8.346E-07 | A5PIF9, Q5W5U3, Q0RDP0, Q32LG3, Q3T186, Q3ZC09, Q5E956, Q3ZJ9, Q3T0P6, Q29RK2, A7MB35, Q9MYM4, A7MBC0, A2VE47, Q3T0E7, Q0IIG5, Q2KJES, Q3B7M9, Q29451, Q58XC1, Q170L1, Q3SZ62, P61287, Q3ZC14, Q3T145, Q0VCM4, Q5E9B1, P10096, A1A4J1, Q3ZCF2, P19858, Q3SZY6, A6QLL8, Q148N0, A4FUF0, Q2KIM0, Q9XSJ4, Q3ZBY4, A5D984, A7MB78, Q3SZM9, Q3SZB7, P11966, Q2HJ7                                                                                                                                                                                                                  | 1472       | 124     | 8785     | 2.117702489     | 0.002558017 | 6.09813E-05 | 0.001506581 |
| GOTERM_BP_FAT | GO:0043623-cellular protein complex assembly                  | 34    | 1.586560896 | 8.867E-07 | Q02399, Q0IIB7, A0INQ6, Q2T9S0, Q0E552, A1A4R8, Q2HJ2, Q17089, P52193, A6H784, A5D9D4, A6QNT3, A1L5A6, Q2KJH4, Q5E9B1, Q0P5F2, A6QPI6, Q0FTR0, Q3MHM5, A7YWD2, Q2KJG0, Q3ZCF7, Q76LV2, P81947, Q02375, Q0RDE9, P42028, Q2HJ86, P48427, A4FUH5, A1A4R8, Q2NL24, Q148J6, Q6479                                                                                                                                                                                                                                                                                                  | 1472       | 85      | 8785     | 2.387228261     | 0.002177686 | 6.3286E-05  | 0.001600748 |
| GOTERM_BP_FAT | GO:0009109-coenzyme catabolic process                         | 15    | 0.699953336 | 1.079E-06 | Q3T145, Q3MHX5, Q32LG3, O77784, P35720, Q29RK1, P11179, Q9XSG3, Q5SD96, Q5SDR8, P20004, Q148D3, Q95123, Q0VCU1, Q3T189                                                                                                                                                                                                                                                                                                                                                                                                                                                        | 1472       | 22      | 8785     | 4.069139081     | 0.003305319 | 7.52425E-05 | 0.001947441 |
| GOTERM_BP_FAT | GO:0070271-protein complex biogenesis                         | 57    | 2.659822678 | 1.159E-06 | Q02399, Q0IIB7, Q5SD72, Q0P5L6, A1A4R8, Q2HJ2, Q0IIG5, P18246, Q5E9H5, Q32L01, A6QPI6, P80177, A2VDN5, Q3MHM5, A7YWD2, P42028, Q2KJF9, Q2HJ86, P48427, Q6479, Q3ZBD3, A1L567, Q3ZC55, A0INQ6, Q5EA65, Q2T9S0, Q1RMU0, Q0E8E2, Q17089, P52193, A6H784, A5D9D4, A6QR05, A6QNT3, A1L5A6, Q32KM1, Q3SZ18, Q0P5F2, P10196, Q9TRY0, P00432, Q2KJG0, Q3ZCF7, Q76LV2, P81947, P79132, A6QLL8, Q02375, A0INJ4, Q0RDE9, Q59HJ6, Q02703, A1A4R8, A4FUH5, Q148J6, Q2NL24, Q95107                                                                                                          | 1472       | 180     | 8785     | 1.88988904      | 0.003550995 | 7.90483E-05 | 0.002092446 |
| GOTERM_BP_FAT | GO:0006461-protein complex assembly                           | 57    | 2.659822678 | 1.159E-06 | Q02399, Q0IIB7, Q5SD72, Q0P5L6, A1A4R8, Q2HJ2, Q0IIG5, P18246, Q5E9H5, Q32L01, A6QPI6, P80177, A2VDN5, Q3MHM5, A7YWD2, P42028, Q2KJF9, Q2HJ86, P48427, Q6479, Q3ZBD3, A1L567, Q3ZC55, A0INQ6, Q5EA65, Q2T9S0, Q1RMU0, Q0E8E2, Q17089, P52193, A6H784, A5D9D4, A6QR05, A6QNT3, A1L5A6, Q32KM1, Q3SZ18, Q0P5F2, P10196, Q9TRY0, P00432, Q2KJG0, Q3ZCF7, Q76LV2, P81947, P79132, A6QLL8, Q02375, A0INJ4, Q0RDE9, Q59HJ6, Q02703, A1A4R8, A4FUH5, Q148J6, Q2NL24, Q95107                                                                                                          | 1472       | 180     | 8785     | 1.88988904      | 0.003550995 | 7.90483E-05 | 0.002092446 |
| GOTERM_BP_FAT | GO:0051187-cofactor catabolic process                         | 16    | 0.746616892 | 1.301E-06 | Q3T145, Q3MHX5, Q32LG3, O77784, P35720, Q29RK1, A5D7K0, P11179, Q9XSG3, Q5SD96, Q5SDR8, P20004, Q148D3, Q95123, Q0VCU1, Q3T189                                                                                                                                                                                                                                                                                                                                                                                                                                                | 1472       | 25      | 8785     | 3.819565217     | 0.003983695 | 8.67713E-05 | 0.002347923 |
| GOTERM_BP_FAT | GO:0006006-glucose metabolic process                          | 35    | 1.633224452 | 2.29E-06  | A5PIF9, Q0RDP0, Q32LG3, Q5W5U3, Q3T186, Q3ZC09, Q5E956, Q3T0P6, Q29RK2, A7MB35, A2VE47, Q3T0E7, Q0IIG5, Q2KJES, Q3B7M9, Q3ZC14, Q3T145, Q0VCM4, Q5E9B1, P10096, A1A4J1, P19858, A6QLL8, Q148N0, A4FUF0, Q9XSJ4, Q3ZBY4, A5D984, A7MB78, Q3SZB7, P11966, Q2HJ7                                                                                                                                                                                                                                                                                                                 | 1472       | 92      | 8785     | 2.270461661     | 0.007002317 | 0.000149498 | 0.004133274 |
| GOTERM_BP_FAT | GO:0006605-protein targeting                                  | 33    | 1.53989734  | 2.846E-06 | A1L567, Q2T9M1, Q1RMV0, A70Z57, Q32L81, Q3T087, Q3SZD1, Q0P5N5, Q3ZC32, A1A4R8, P63103, Q3SZC1, C1JZ67, P52193, Q3SZ87, Q3ZK99, Q2T9U1, A6QLB1, P62261, A6QPI4, Q3MHX8, Q3SZ14, A6QLL2, Q1LZB5, A7YWD2, Q2TBS1, Q6EWQ7, Q3ZPG1, Q2KJF7, Q3SYV6, Q3ZCH0, Q0G846, Q5EA68                                                                                                                                                                                                                                                                                                        | 1472       | 85      | 8785     | 2.317015665     | 0.008695278 | 0.000181927 | 0.005136931 |
| GOTERM_BP_FAT | GO:0006897-endocytosis                                        | 31    | 1.446570229 | 3.468E-06 | A7Z035, Q17Q15, Q0IIE6, A2VDR6, P80746, A4FUG8, Q3T0G8, Q0IIG7, Q5E9Q4, Q0RDE3, Q3T0C9, Q2TBX8, Q95114, Q5EA77, P61763, Q2KJ11, Q1UQ98, P11023, A5D7R9, P62998, P63009, Q0VCK3, P45478, A5D794, P52174, P52175, Q3T0Q4, Q3T0R3, Q5E9R3, Q3ZPG1, Q3SYV4, Q0E6G3, A6H7G2                                                                                                                                                                                                                                                                                                        | 1472       | 78      | 8785     | 2.371925516     | 0.010587035 | 0.00021719  | 0.006260461 |
| GOTERM_BP_FAT | GO:0010324-membrane invagination                              | 31    | 1.446570229 | 3.468E-06 | A7Z035, Q17Q15, Q0IIE6, A2VDR6, P80746, A4FUG8, Q3T0G8, Q0IIG7, Q5E9Q4, Q0RDE3, Q3T0C9, Q2TBX8, Q95114, Q5EA77, P61763, Q2KJ11, Q1UQ98, P11023, A5D7R9, P62998, P63009, Q0VCK3, P45478, A5D794, P52174, P52175, Q3T0Q4, Q3T0R3, Q5E9R3, Q3ZPG1, Q3SYV4, Q0E6G3, A6H7G2                                                                                                                                                                                                                                                                                                        | 1472       | 78      | 8785     | 2.371925516     | 0.010587035 | 0.00021719  | 0.006260461 |
| GOTERM_BP_FAT | GO:0022904-respiratory electron transport chain               | 14    | 0.653289781 | 4.16E-06  | Q85BD6, P31800, Q02827, P00157, P68530, Q6QTH0, Q6QGT5, Q3T0G8, Q07552, Q02372, P15690, P52505, P23935, P00129                                                                                                                                                                                                                                                                                                                                                                                                                                                                | 1472       | 21      | 8785     | 3.978713768     | 0.012687163 | 0.000255334 | 0.007510249 |
| GOTERM_BP_FAT | GO:0016044-membrane organization                              | 44    | 2.053196454 | 4.361E-06 | A7Z035, Q0VCA3, Q17Q15, P00442, Q1RMV0, A4IF87, Q0IIE6, A2VDR6, Q32LM0, P80746, A4FUG8, Q5E9Q4, Q0IIG7, Q3T0G8, Q0RDE3, Q3T0C9, Q2TBX8, Q95114, Q5EA77, P61763, Q2KJ11, Q1UQ98, A4FV54, P11023, A5D7R9, P62998, A6QPI6, P63009, Q0VCK3, P45478, P41541, A5D794, P52174, P52175, Q3T0Q4, Q76LV2, Q3T0R3, Q5E9R3, Q3ZPG1, A6QR14, Q3SYV4, Q0E6G3, A6H7G2, Q02703, Q2T991, Q3SZB3                                                                                                                                                                                                | 1472       | 131     | 8785     | 2.004542814     | 0.013294613 | 0.000262393 | 0.007872235 |
| GOTERM_BP_FAT | GO:0008652-cellular amino acid biosynthetic process           | 18    | 0.839944004 | 4.578E-06 | Q2NL31, Q58DW2, Q5EA40, Q2KJH7, A7E317, A4IFQ7, Q0VD27, Q2KHU0, A7YWE4, P33097, Q1LZ43, P12344, Q58DT4, A0INJ4, Q58D08, Q4IJJ3, P00376, Q3SZ30                                                                                                                                                                                                                                                                                                                                                                                                                                | 1472       | 33      | 8785     | 3.255311265     | 0.013950847 | 0.000270138 | 0.008263541 |

| Category      | Term                                                                               | Count | %           | PValue    | Genes                                                                                                                                                                                                                                                                                                                                                                                                                                                                                                                                                                                                  | List Total | Pop Hits | Pop Total | Fold Enrichment | Bonferroni  | Benjamini   | FDR         |
|---------------|------------------------------------------------------------------------------------|-------|-------------|-----------|--------------------------------------------------------------------------------------------------------------------------------------------------------------------------------------------------------------------------------------------------------------------------------------------------------------------------------------------------------------------------------------------------------------------------------------------------------------------------------------------------------------------------------------------------------------------------------------------------------|------------|----------|-----------|-----------------|-------------|-------------|-------------|
| GOTERM_BP_FAT | G00007049-cell cycle                                                               | 73    | 3.406439571 | 5.566E-06 | P00570, Q2KIZ8, Q02399, Q2TA25, A6QLA6, Q3MHL3, A6QM04, Q3ZBV1, P48734, Q0P5L6, Q2K113, Q2NKY7, Q08DB9, Q3B7M6, Q0VCV0, Q1JQB2, Q0P5H5, P61287, A2VDN5, Q3ZBH9, Q3SZY3, Q2T9P4, Q2KJ11, Q05B84, Q2YDQ3, Q86211, Q5E964, P62285, Q3T054, Q0P5A1, Q08DQ9, Q08MD7, Q3ZBD9, Q27991, Q1LZC6, Q0P517, Q3MH64, P62157, Q2YD10, Q5E994, Q2YD10, Q5E994, Q3ZBK3, Q17QG2, Q0I123, Q3SZP2, Q2HJG1, Q3T0E7, Q58D97, P52193, A5D7V1, A6H7B3, Q1RHM9, Q3ZPF3, Q3TOM7, P53712, Q2NL37, Q0VCX4, Q2TBN3, Q3HNG7, Q24YJ3, Q2KJDO, Q3SWZ6, P46196, A7Y7Y5, Q5BINS, P79126, P46193, Q08DE1, A2VE99, A5PJU9, Q3ZCF0, Q2TA37 | 1472       | 261      | 8785      | 1.669230489     | 0.016938102 | 0.000322272 | 0.010048093 |
| GOTERM_BP_FAT | G00019318-hexose metabolic process                                                 | 39    | 1.819878675 | 6.491E-06 | A5PJF9, Q5W5U3, Q08DP0, Q3ZLQ3, Q3T186, Q3ZC09, Q5E956, Q3SZJ9, Q3T0P6, Q29RK2, A7MB35, A2VE47, Q3T0E7, Q9MYM4, Q0ICG5, Q2KJF5, Q3B7M9, Q29451, Q58CX1, Q3SZ62, P61287, Q3ZC4, Q3T145, Q0VCM4, Q5E9B1, P10096, A1A411, P19858, A6QLL8, Q148N0, A4FUJ0, Q2KIM0, Q9XSJ4, Q3ZBY4, A5D984, A7MB78, Q3SZB7, P11966, Q2HJ17                                                                                                                                                                                                                                                                                  | 1472       | 112      | 8785      | 2.078167459     | 0.019724206 | 0.000368845 | 0.011717344 |
| GOTERM_BP_FAT | G00006979-response to oxidative stress                                             | 26    | 1.21325245  | 8.433E-06 | Q3ZKL2, P00442, P35705, Q2NL01, Q58DT4, Q9XSG3, Q3T0C8, Q3MHF7, Q279V6, Q9N2I8, P00435, P00432, Q5E946, Q5E947, Q02366, Q97725, Q0P594, P37359, P17694, P48305, Q3ZS38, Q9BGJ3, Q9BGI1, Q77834, P42028, Q59HJ6, P41976                                                                                                                                                                                                                                                                                                                                                                                 | 1472       | 62       | 8785      | 2.502739306     | 0.025549145 | 0.000470456 | 0.015225588 |
| GOTERM_BP_FAT | G00009259-ribonucleotide metabolic process                                         | 40    | 1.866542231 | 1.002E-05 | P00570, A5PK70, Q2HJ58, Q00361, P11019, Q97681, Q2HJ33, P31408, Q3T0C6, Q59A32, P31404, P32876, A0JNA3, P31754, Q3SWY3, P13620, P57709, P13621, P40682, Q08DA1, P05631, P22027, Q09927, P05630, Q0VCK0, Q2HJ26, A7MBIR, P52174, P52175, Q3T0Q4, Q0VC13, P21282, Q0VCY0, P56658, P13619, Q59HJ6, P15690, Q2KJ66, Q28851, P00829, Q28852, P61420                                                                                                                                                                                                                                                         | 1472       | 118      | 8785      | 2.023074797     | 0.030275186 | 0.00054883  | 0.01808184  |
| GOTERM_BP_FAT | G00006413-translation initiation                                                   | 17    | 0.793280448 | 1.436E-05 | Q5E956, Q9N0T5, Q3ZCK1, Q5E9B4, Q3T102, Q3ZLQ3, Q3T0E8, Q0I13, Q2KHU8, Q56Z5, Q3T122, Q5E9D0, Q3SYW6, Q0IIF2, A7MB16, Q3T0V3, Q3ZLJ9                                                                                                                                                                                                                                                                                                                                                                                                                                                                   | 1472       | 32       | 8785      | 3.170537534     | 0.043110876 | 0.00077282  | 0.025917973 |
| GOTERM_BP_FAT | G00045454-cell redox homeostasis                                                   | 23    | 1.073261783 | 1.686E-05 | Q0Z7W6, P35705, P23196, Q3ZCL8, Q58DA7, Q5E947, A6QLZ6, Q2BTU2, Q9BGI2, A6QLL8, P10075, A5D7E8, Q9BGI3, Q3ZS38, Q3MHF7, Q9BGI1, Q3T0L2, Q77834, A6H784, Q2KIL5, A6H732, Q9N2I8, A6QL97, Q5E936                                                                                                                                                                                                                                                                                                                                                                                                         | 1472       | 53       | 8785      | 2.589917453     | 0.050426901 | 0.000891719 | 0.030431262 |
| GOTERM_BP_FAT | G00009150-purine ribonucleotide metabolic process                                  | 38    | 1.773215119 | 2.126E-05 | P00570, A5PK70, Q00361, P11019, Q97681, Q2HJ33, P31408, Q3T0C6, Q59A32, P31404, P32876, A0JNA3, Q3SWY3, P13620, P57709, P13621, P40682, Q08DA1, P05631, P22027, Q09927, P05630, Q0VCK0, Q2HJ26, A7MBIR, P52174, P52175, Q3T0Q4, Q0VC13, P21282, Q0VCY0, P56658, P13619, Q59HJ6, P15690, Q2KJ66, Q28851, P00829, Q28852, P61420                                                                                                                                                                                                                                                                         | 1472       | 113      | 8785      | 2.006961812     | 0.063170157 | 0.001105382 | 0.038375816 |
| GOTERM_BP_FAT | G00031163-metallo-sulfur cluster assembly                                          | 8     | 0.373308446 | 2.492E-05 | Q3SZGR, Q17Q66, Q2TBG7, Q24K00, A4FV58, Q2KJF3, Q3ZP16, Q05B87                                                                                                                                                                                                                                                                                                                                                                                                                                                                                                                                         | 1472       | 8        | 8785      | 5.968070652     | 0.073622353 | 0.001273743 | 0.044972661 |
| GOTERM_BP_FAT | G00016226-iron-sulfur cluster assembly                                             | 8     | 0.373308446 | 2.492E-05 | Q3SZGR, Q17Q66, Q2TBG7, Q24K00, A4FV58, Q2KJF3, Q3ZP16, Q05B87                                                                                                                                                                                                                                                                                                                                                                                                                                                                                                                                         | 1472       | 8        | 8785      | 5.968070652     | 0.073622353 | 0.001273743 | 0.044972661 |
| GOTERM_BP_FAT | G00007010-cytoskeleton organization                                                | 50    | 2.333177788 | 3.101E-05 | Q3ZKS0, Q3B7N2, P38584, A6QNZ5, Q08DR9, P63258, A6H720, A5D7D1, A5D7P5, P57709, P62998, A2VDN5, Q3ZLQ2, Q3ZCL5, P61585, Q27991, Q2YD10, Q5E997, A4FUAR, P00442, Q3ZCK2, Q2TA45, A2VDBK3, Q2VDBK6, A2VDBK6, Q0I123, Q2HJG1, Q1LZB2, P52193, Q2TA49, Q0VCF1, Q3TOM7, Q08DP6, P53712, Q0VCX4, A5D7B9, Q2TBN3, Q3ZP97, A7E284, P31976, A0JNH5, Q2KJDO, A0JNH7, P81947, Q09430, A7Y7Y5, Q3SYV4, Q148J6, Q95107, Q1RMT6                                                                                                                                                                                      | 1472       | 167      | 8785      | 1.786487501     | 0.090773484 | 0.001558801 | 0.055959521 |
| GOTERM_BP_FAT | G00006163-purine nucleotide metabolic process                                      | 42    | 1.959869342 | 3.901E-05 | P00570, A5PK70, Q2HJ58, Q00361, P11019, Q97681, Q2HJ33, P31408, Q3T0C6, Q59A32, P31404, P32876, A0JNA3, Q3SZ18, Q3SWY3, P13620, P57709, P13621, P40682, Q08DA1, P05631, P22027, Q09927, Q0VCK0, Q2HJ26, A7MBIR, P52174, P52175, Q3T0Q4, Q0VC13, P21282, Q0VCY0, P56658, P13619, Q59HJ6, P15690, Q2KJ66, Q28851, P00829, Q28852, P61420                                                                                                                                                                                                                                                                 | 1472       | 133      | 8785      | 1.88465389      | 0.112840374 | 0.001929271 | 0.070402447 |
| GOTERM_BP_FAT | G00007017-microtubule-based process                                                | 42    | 1.959869342 | 3.901E-05 | Q2YD10, Q3ZKS0, Q2NL05, Q2T9S0, Q3ZBK3, P38584, Q0I123, Q2HJG1, A6QNZ5, Q08DH4, Q08DR9, A5D7N6, A6H7H2, A6QNT3, Q3TOM7, A5D7P5, Q3ZK11, P23356, Q0VCX4, Q2TBN3, P61285, Q3ZP97, A7MB1A, A2VDN5, Q3MHM5, A7E2Z6, Q5E9M9, A0JNH5, Q2KJDO, Q3ZCF7, P81947, A0JNH7, Q2HJF8, A7Y7Y5, Q0P5A1, Q3MHR3, Q2HJ86, Q3ZCF0, Q3MHJ2, A6QPER, Q3ZBD2, Q29R16                                                                                                                                                                                                                                                         | 1472       | 133      | 8785      | 1.88465389      | 0.112840374 | 0.001929271 | 0.070402447 |
| GOTERM_BP_FAT | G00010035-response to inorganic substance                                          | 20    | 0.933271115 | 4.748E-05 | P00435, P35705, P00442, P00432, Q5E946, Q5E947, Q8W9N9, Q2KJ72, A4FV00, Q5EA2C, Q05B87, P37359, Q0P594, Q9BGI3, Q3ZS38, Q3MHF7, Q9BGI1, Q77834, A5PJL5, Q9N2I8, P41976                                                                                                                                                                                                                                                                                                                                                                                                                                 | 1472       | 45       | 8785      | 2.652475845     | 0.135591124 | 0.002310175 | 0.085671792 |
| GOTERM_BP_FAT | G00016053-organic acid biosynthetic process                                        | 33    | 1.53989734  | 5.081E-05 | Q5EA40, Q5E956, Q0VCA7, Q95JH2, Q2KJH7, A7E3T7, Q2KJG4, A4IFQ7, A7Y7W4, Q1LZA3, Q3ZLQ0, P12344, Q7YS70, Q58DT4, Q4JH3, P58108, P52505, A5PIC5, P00376, Q3SZJ0, Q2NL31, P80177, Q58DW2, Q3ZC12, A6H7G3, Q0V2D7, Q2KHU0, P33097, A0JN4, Q58D08, Q5BIP7, Q3ZBF7, Q3ZBY7                                                                                                                                                                                                                                                                                                                                   | 1472       | 96       | 8785      | 2.051524287     | 0.144397078 | 0.002433735 | 0.091689483 |
| GOTERM_BP_FAT | G00046394-carboxylic acid biosynthetic process                                     | 33    | 1.53989734  | 5.081E-05 | Q5EA40, Q5E956, Q0VCA7, Q95JH2, Q2KJH7, A7E3T7, Q2KJG4, A4IFQ7, A7Y7W4, Q1LZA3, Q3ZLQ0, P12344, Q7YS70, Q58DT4, Q4JH3, P58108, P52505, A5PIC5, P00376, Q3SZJ0, Q2NL31, P80177, Q58DW2, Q3ZC12, A6H7G3, Q0V2D7, Q2KHU0, P33097, A0JN4, Q58D08, Q5BIP7, Q3ZBF7, Q3ZBY7                                                                                                                                                                                                                                                                                                                                   | 1472       | 96       | 8785      | 2.051524287     | 0.144397078 | 0.002433735 | 0.091689483 |
| GOTERM_BP_FAT | G00000279-M phase                                                                  | 36    | 1.679888007 | 8.458E-05 | Q2YD10, Q2TA25, Q3ZPA5, A6QM04, Q3ZBK3, Q17QG2, Q0P5L6, P48734, Q0I123, Q3SZP2, Q2NKY7, Q2HJG1, Q58D97, Q08DB9, Q3B7M6, A6H7B3, Q0VCV0, Q1JQB2, Q3TOM7, Q2TBN3, Q3HNG7, Q24YJ3, Q3SZY3, Q2YD10, Q5E9B4, Q2KJ11, Q86211, Q5E964, P62285, Q3T054, A7Y7Y5, Q0P5A1, Q08DQ9, Q3ZBD9, Q3ZCF0, Q1LZG6                                                                                                                                                                                                                                                                                                         | 1472       | 111      | 8785      | 1.935590482     | 0.228627274 | 0.00398563  | 0.152574563 |
| GOTERM_BP_FAT | G00018130-heterocycle biosynthetic process                                         | 17    | 0.793280448 | 8.926E-05 | Q17QK8, Q3T0Z7, Q2KJH7, Q2KINS, A7Y7W4, P22600, Q58DK5, Q1JQD7, Q58DT4, Q56W4, Q58D49, Q5E9T4, P56658, Q58D08, Q5BIP7, Q3SZ18, Q3ZBD3                                                                                                                                                                                                                                                                                                                                                                                                                                                                  | 1472       | 36       | 8785      | 2.818255586     | 0.239631057 | 0.004142178 | 0.161012745 |
| GOTERM_BP_FAT | G00006890-retrograde vesicle-mediated transport, Golgi to ER                       | 8     | 0.373308446 | 9.581E-05 | P53620, P53619, Q27954, A5PJ65, P35605, A2VDR8, P35604, Q28104                                                                                                                                                                                                                                                                                                                                                                                                                                                                                                                                         | 1472       | 9        | 8785      | 5.304951691     | 0.254761975 | 0.004379213 | 0.172816202 |
| GOTERM_BP_FAT | G00016071-mRNA metabolic process                                                   | 46    | 2.146523565 | 0.0001007 | Q17QI2, Q5E959, Q3MHX3, Q2YDD2, Q24Z8, Q2KJ10, Q5E992, Q3ZBV3, Q5E9Z8, Q3ZSR8, Q3ZBK6, A5D7H5, P09867, Q3ZBA6, Q3ZCF0, Q0P5D0, Q3ZC2, Q0P5D2, Q2HJ60, P61286, A1A4K8, Q3ZPE9, Q29RH4, A6QPH1, Q3ZCA2, Q3T147, Q8MJJ7, Q5E9J1, Q3T0D0, Q3T102, P67808, A5D9H5, A0JNS2, Q3T106, Q3B8S0, Q3SYR3, Q3MHRS, P79101, Q2KIR1, Q3B7L6, Q3MHJ2, Q2KJ71, Q2NL22, Q10568, Q1RMR2, Q0VCY7                                                                                                                                                                                                                           | 1472       | 156      | 8785      | 1.759815705     | 0.265965603 | 0.004536728 | 0.181710561 |
| GOTERM_BP_FAT | G00000302-response to reactive oxygen species                                      | 13    | 0.606626225 | 0.0001022 | P00435, P00442, P35705, P00432, Q5E946, Q5E947, P37359, Q0P594, Q9BGI3, Q3MHF7, Q9BGI1, Q77834, Q9N2I8, P41976                                                                                                                                                                                                                                                                                                                                                                                                                                                                                         | 1472       | 23       | 8785      | 3.373257325     | 0.269294279 | 0.004536699 | 0.184379156 |
| GOTERM_BP_FAT | G00042773-ATP synthesis coupled electron transport                                 | 11    | 0.513299113 | 0.0001047 | Q3T0G8, Q85BD6, P31800, Q02372, Q05752, P15690, Q02827, Q6Q1G5, Q6Q1H0, P52505, P00129                                                                                                                                                                                                                                                                                                                                                                                                                                                                                                                 | 1472       | 17       | 8785      | 3.861692775     | 0.27480588  | 0.004579708 | 0.188824481 |
| GOTERM_BP_FAT | G00034404-nucleobase, nucleoside and nucleotide biosynthetic process               | 46    | 2.146523565 | 0.0001188 | A0JNE9, A5PK70, Q2HJ58, Q00361, A6H7F4, P11019, Q97681, P31408, Q3T0C6, Q59A32, P31404, P32876, Q2KIW9, A0JNA3, P31754, Q3SWY3, P13620, P57709, P13621, Q1RMS2, P40682, Q08DA1, P05631, P22027, Q2TA32, Q09927, Q0VCK0, P05630, Q2HJ26, P52174, P52175, Q3T0Q4, Q8MKF1, Q0VC13, P21282, Q56W4, A2VDS0, Q0VCY0, P56658, P13619, Q2KJ66, Q28851, P00829, Q28852, P61420, Q08DW2                                                                                                                                                                                                                          | 1472       | 157      | 8785      | 1.748606688     | 0.305532447 | 0.005122186 | 0.214239316 |
| GOTERM_BP_FAT | G00034654-nucleobase, nucleoside, nucleotide and nucleic acid biosynthetic process | 46    | 2.146523565 | 0.0001188 | A0JNE9, A5PK70, Q2HJ58, Q00361, A6H7F4, P11019, Q97681, P31408, Q3T0C6, Q59A32, P31404, P32876, Q2KIW9, A0JNA3, P31754, Q3SWY3, P13620, P57709, P13621, Q1RMS2, P40682, Q08DA1, P05631, P22027, Q2TA32, Q09927, Q0VCK0, P05630, Q2HJ26, P52174, P52175, Q3T0Q4, Q8MKF1, Q0VC13, P21282, Q56W4, A2VDS0, Q0VCY0, P56658, P13619, Q2KJ66, Q28851, P00829, Q28852, P61420, Q08DW2                                                                                                                                                                                                                          | 1472       | 157      | 8785      | 1.748606688     | 0.305532447 | 0.005122186 | 0.214239316 |
| GOTERM_BP_FAT | G00015992-proton transport                                                         | 20    | 0.933271115 | 0.0001354 | P40682, P22027, P05631, P05630, Q00361, P11019, Q97681, P21282, P31408, P13619, P32876, P31404, Q2KJ66, Q28851, P00829, Q28852, P61420, P13620, P11024, P13621                                                                                                                                                                                                                                                                                                                                                                                                                                         | 1472       | 48       | 8785      | 2.486696105     | 0.340120967 | 0.005756959 | 0.244221714 |



| Category      | Term                                                                    | Count | %           | PValue    | Genes                                                                                                                                                                                                                                                                                                                                                                                                                                                                                                                                                                                                                      | List Total | Pop Hits | Pop Total | Fold Enrichment | Bonferroni  | Benjamini   | FDR         |
|---------------|-------------------------------------------------------------------------|-------|-------------|-----------|----------------------------------------------------------------------------------------------------------------------------------------------------------------------------------------------------------------------------------------------------------------------------------------------------------------------------------------------------------------------------------------------------------------------------------------------------------------------------------------------------------------------------------------------------------------------------------------------------------------------------|------------|----------|-----------|-----------------|-------------|-------------|-------------|
| GOTERM_BP_FAT | GO:0006790-sulfur metabolic process                                     | 21    | 0.979934671 | 0.0001453 | Q2NL31, Q8SDW2, P00435, Q5I998, P00442, Q3MHLA, A7E3T7, Q3SZU4, Q0VD27, Q9TUM3, Q5EAC2, Q8MKF1, Q9XSG3, A5PKG4, Q3ZS38, Q2T9Y6, Q5E9T4, Q4J1J3, Q5B1P7, Q17QV7, Q18T56                                                                                                                                                                                                                                                                                                                                                                                                                                                     | 1472       | 52       | 8785      | 2.410182379     | 0.359874879 | 0.006092211 | 0.262054017 |
| GOTERM_BP_FAT | GO:0048285-organellar fission                                           | 29    | 1.353243117 | 0.0001471 | Q2YD10, Q148K5, Q2TAA2, Q3ZPA5, A6QM04, Q3ZBK3, Q17QCG, Q0P5L6, P48T34, Q3SZP2, Q2NKY7, Q5SD97, Q08DR9, Q0VCP2, Q3B7M6, A6HTB3, Q11QB2, Q2TBN3, Q24YV3, Q3SZY3, Q05B84, P62285, Q3T054, A7Y7Y5, Q0P5A1, Q3ZBD9, Q3ZCF0, Q02703, Q1LZG6                                                                                                                                                                                                                                                                                                                                                                                     | 1472       | 84       | 8785      | 2.060405344     | 0.363254473 | 0.006081234 | 0.265159569 |
| GOTERM_BP_FAT | GO:0051301-cell division                                                | 36    | 1.67988007  | 0.0001858 | Q2YD10, Q02399, Q5E994, Q2TA25, Q3ZPA5, A6QM04, Q3ZBK3, Q3ZBVI, Q17QCG, P48T34, Q3ZBK8, Q3SZP2, Q2NKY7, Q5SD97, Q3T0E7, Q3B7M6, Q5E9D5, P61287, Q2TBN3, A2VND5, Q24YV3, Q3SZY3, Q05B84, Q2YDYG, Q2KJ11, P62285, Q3T054, A7Y7Y5, Q0P5A1, Q08DM7, A2VE99, Q3ZBD9, A5PIU9, Q27991, Q1LZG6, P27214                                                                                                                                                                                                                                                                                                                             | 1472       | 115      | 8785      | 1.868265595     | 0.434623192 | 0.007574671 | 0.334875454 |
| GOTERM_BP_FAT | GO:0008610-lipid biosynthetic process                                   | 48    | 2.239850677 | 0.0001866 | P07514, A0INCI, P10790, Q8WMY2, Q5EA65, Q3MHZ7, Q5E956, Q0VCA7, Q95IH2, Q1LZ95, Q2KJG4, Q29RK2, Q32LM0, Q1LZ44, Q7Y5T0, Q3ZPE2, Q70VZ7, P58108, A6QRO5, Q58CR4, Q11QD0, Q3ZBE9, P32055, A5P1C5, Q3SZL5, Q3SZL3, Q5E9H7, Q5E9J5, P80177, Q2KHV9, Q8WMV1, A6HTG3, A4FUD2, Q3T103, Q2KJ28, P84466, P56966, Q5E9T8, Q5SDH7, A6QR14, Q5E9R6, P20456, Q3ZBF7, Q3ZBY7, Q2NL29, Q3ZCD7, Q0VCY6, Q3ZBF8                                                                                                                                                                                                                             | 1472       | 169      | 8785      | 1.695073321     | 0.436098762 | 0.007509506 | 0.336407478 |
| GOTERM_BP_FAT | GO:0006818-hydrogen transport                                           | 20    | 0.933271115 | 0.0001869 | P40882, P22027, P05631, P05630, Q00361, P11019, Q97681, P21282, P31408, P13619, P32876, P31404, Q2KJB6, Q28851, P00829, Q28852, P61420, P13620, P11024, P13621                                                                                                                                                                                                                                                                                                                                                                                                                                                             | 1472       | 49       | 8785      | 2.435947205     | 0.436550397 | 0.007422671 | 0.336877189 |
| GOTERM_BP_FAT | GO:0000996-sulfur amino acid metabolic process                          | 10    | 0.466635558 | 0.0001924 | A5PKG4, Q2NL31, Q8SDW2, Q3ZS38, Q5I998, Q3MHLA, Q4J1J3, A7E3T7, Q3SZU4, Q0VD27                                                                                                                                                                                                                                                                                                                                                                                                                                                                                                                                             | 1472       | 15       | 8785      | 3.978713768     | 0.445887523 | 0.007540498 | 0.346672793 |
| GOTERM_BP_FAT | GO:0009069-serine family amino acid metabolic process                   | 11    | 0.513299113 | 0.0002003 | A5PKG4, Q8SDW2, Q3ZS38, P25285, A0INA3, Q3SZU4, Q2KHU0, Q46504, P20821, P00376, Q3SZ20                                                                                                                                                                                                                                                                                                                                                                                                                                                                                                                                     | 1472       | 18       | 8785      | 3.647154287     | 0.4592032   | 0.007750966 | 0.360929974 |
| GOTERM_BP_FAT | GO:0009260-ribonucleotide biosynthetic process                          | 34    | 1.586560896 | 0.0002132 | A5PK70, Q2HJ58, Q00361, P11019, Q97681, P31408, Q3T0C6, Q59A32, P32876, P31404, A0INA3, P31754, Q3SWY3, P13620, P57709, P13621, P40682, Q08DA1, P05631, P22027, P05630, Q0VCK0, P52174, Q2HJ26, P52175, Q3T0Q4, Q0VC13, P21282, Q0VCY0, P56658, P13619, Q2KJB6, Q28851, P00829, Q28852, P61420                                                                                                                                                                                                                                                                                                                             | 1472       | 107      | 8785      | 1.896396282     | 0.480251023 | 0.008146755 | 0.384193748 |
| GOTERM_BP_FAT | GO:0006891-intra-Golgi vesicle-mediated transport                       | 8     | 0.373308446 | 0.000273  | P53620, P53619, P60519, Q27954, P35605, P35604, Q28104, Q3ZC32                                                                                                                                                                                                                                                                                                                                                                                                                                                                                                                                                             | 1472       | 10       | 8785      | 4.774456522     | 0.567410357 | 0.010291928 | 0.491691589 |
| GOTERM_BP_FAT | GO:000087-M phase of mitotic cell cycle                                 | 28    | 1.306579561 | 0.0003016 | Q2YD10, Q2TA25, Q3ZPA5, A6QM04, Q3ZBK3, Q17QCG, Q0P5L6, P48T34, Q3SZP2, Q2NKY7, Q5SD97, Q08DR9, Q3B7M6, A6HTB3, Q11QB2, Q2TBN3, Q24YV3, Q3SZY3, Q05B84, P62285, Q86G11, Q3T054, A7Y7Y5, Q0P5A1, Q08DQ9, Q3ZBD9, Q3ZCF0, Q1LZG6                                                                                                                                                                                                                                                                                                                                                                                             | 1472       | 83       | 8785      | 2.013325039     | 0.603728697 | 0.011225014 | 0.543005633 |
| GOTERM_BP_FAT | GO:0043933-macromolecular complex subunit organization                  | 76    | 3.546430238 | 0.0003285 | Q02399, Q3T0N9, Q0187, Q5SD72, Q0P5L6, A1A418, Q2HJ2, Q01G5, A6HT67, P84227, P18246, Q3ZS29, Q3ZL01, Q5E9H5, A6QPI6, A2VND5, P80177, Q17Q10, Q3MHM5, A7YWD2, Q2T9P4, Q86G11, Q0VC16, P42028, Q2KJF9, Q2HJ86, P48427, Q64719, Q3ZBD3, A1L567, Q3ZC55, Q2TA40, A0INQ6, Q17QCG, Q5EA65, Q2T9S0, Q1R1M4, A6QNM2, Q08E52, Q3T1A6, Q9T147, Q3T122, Q17Q89, P52193, A6HTB4, A5Z9D4, A6QRO5, A1L5A6, A6QNT3, Q3ZS18, Q3ZKM1, Q0VCX5, Q0P5E2, Q5E9F8, Q3H1E7, P01996, Q7R1Y0, P00432, Q2KID0, Q3ZC77, Q76L2, P81947, P79132, A6QLR8, Q02375, A7Y7Y5, A0IN14, Q08DE0, Q59HJ6, P19035, Q02703, A4FUH5, A1A418, Q18J16, Q2NL24, Q95107 | 1472       | 308      | 8785      | 1.47264081      | 0.635223301 | 0.012076724 | 0.591441624 |
| GOTERM_BP_FAT | GO:0009165-nucleotide biosynthetic process                              | 43    | 2.006532898 | 0.0003435 | A0INE9, A5PK70, Q2HJ58, Q00361, P11019, Q97681, P31408, Q3T0C6, Q59A32, P31404, P32876, Q2KJW9, A0INA3, P31754, Q3SWY3, P13620, P57709, P13621, Q1R1M4, P40682, Q08DA1, P05631, P22027, Q2TA32, Q0VCK0, P05630, Q2HJ26, P52174, P52175, Q3T0Q4, Q8MKF1, Q0VC13, P21282, A2VND5, Q0VCY0, P56658, P13619, Q2KJB6, Q28851, P00829, Q28852, P61420, Q08DW2                                                                                                                                                                                                                                                                     | 1472       | 150      | 8785      | 1.71084692      | 0.651588219 | 0.012472566 | 0.618227262 |
| GOTERM_BP_FAT | GO:0012501-programmed cell death                                        | 52    | 2.4265049   | 0.000347  | Q95KV7, Q5E9L4, Q5E9C2, A0INK3, P56541, Q3T0K8, Q58CZ0, P45478, Q5E9M9, Q645M6, Q0VC36, Q29RZ9, P43481, Q2HJF8, Q0VC37, Q01H8, Q2HJF6, Q0P5M9, P15690, Q08DY9, Q0V882, Q3SX43, P00442, Q2KJH1, Q3T0P5, Q3ZBT1, Q3ZK19, Q3ZLM0, Q01D6, Q3ZLE4, Q3T0E5, P38447, Q5E9J6, Q3ZBG8, Q2NL36, Q0VCX4, P89222, P45879, Q0P5F4, A6QQW8, P00435, A7E5S4, P32007, Q3T169, Q11QC5, A4H78, Q08DE0, Q2HJH9, Q5EAC7, Q02703, Q2NL24, Q01H8                                                                                                                                                                                                 | 1472       | 192      | 8785      | 1.616352468     | 0.655264343 | 0.012450983 | 0.624478114 |
| GOTERM_BP_FAT | GO:0006399-rRNA metabolic process                                       | 28    | 1.306579561 | 0.0003748 | A6QNM8, Q3ZBVS, Q05B50, A7Y7Y9, Q02691, A6HTF4, Q2KJG3, A5D7A2, A4FUC8, Q2KIF8, Q3MH4A, A7MBCS, Q11QB6, Q1R1M4, A8E4P2, Q0P5H7, P17248, Q9GMB8, Q3T099, A6H7E1, Q0VC30, Q2K184, A6QLT9, A7MBD4, Q3ZK11, A6QLR2, A5D7G0, Q2T9L8                                                                                                                                                                                                                                                                                                                                                                                             | 1472       | 84       | 8785      | 1.989356884     | 0.683469749 | 0.013286944 | 0.674361579 |
| GOTERM_BP_FAT | GO:0006915-apoptosis                                                    | 51    | 2.379841344 | 0.0003825 | Q95KV7, Q5E9L4, Q5E9C2, A0INK3, P56541, Q3T0K8, Q58CZ0, P45478, Q5E9M9, Q645M6, Q0VC36, Q29RZ9, Q2HJF8, Q01H8, Q0VC37, Q2HJF6, Q0P5M9, P15690, Q08DY9, Q0V882, Q3SX43, P00442, Q2KJH1, Q3T0P5, Q3ZBT1, Q3ZK19, Q3ZLM0, Q01D6, Q3ZLE4, Q3T0E5, P38447, Q5E9J6, Q3ZBG8, Q2NL36, Q0VCX4, P89222, P45879, Q0P5F4, A6QQW8, P00435, A7E5S4, P32007, Q3T169, Q11QC5, A4H78, Q08DE0, Q2HJH9, Q5EAC7, Q02703, Q2NL24, Q01H8                                                                                                                                                                                                         | 1472       | 188      | 8785      | 1.61899789      | 0.690918819 | 0.01340553  | 0.688274403 |
| GOTERM_BP_FAT | GO:0008380-RNA splicing                                                 | 32    | 1.493233784 | 0.0004357 | Q5E959, Q3MHX3, Q2KJ10, Q5E992, Q3ZBV3, Q5E928, Q3ZSR8, Q3ZBK6, A5D7H5, P09867, Q3ZCE0, Q0P5D0, Q2HJ60, P61286, A1A4K3, Q3ZPE9, Q29RH4, Q3T147, Q5E911, Q3T0D0, P67808, A0IN52, Q3T106, Q3B8S0, Q3MHR5, Q2K1R1, Q3B7L6, Q3MHE2, Q2KJ71, Q2NL22, Q1R1M2, Q0VCY7                                                                                                                                                                                                                                                                                                                                                             | 1472       | 102      | 8785      | 1.872335891     | 0.737474051 | 0.015082885 | 0.783596233 |
| GOTERM_BP_FAT | GO:0009152-purine ribonucleotide biosynthetic process                   | 32    | 1.493233784 | 0.0004357 | A5PK70, Q00361, P11019, Q97681, P31408, Q3T0C6, Q59A32, P32876, P31404, A0INA3, Q3SWY3, P13620, P13621, P57709, P40682, Q08DA1, P05631, P22027, P05630, Q0VCK0, P52174, Q2HJ26, P52175, Q3T0Q4, Q0VC13, P21282, Q0VCY0, P56658, P13619, Q2KJB6, Q28851, P00829, Q28852, P61420                                                                                                                                                                                                                                                                                                                                             | 1472       | 102      | 8785      | 1.872335891     | 0.737474051 | 0.015082885 | 0.783596233 |
| GOTERM_BP_FAT | GO:0006518-peptide metabolic process                                    | 13    | 0.606626225 | 0.0004461 | Q1JPJ8, Q3T134, P67810, P00435, P00442, Q2KJ36, Q3SZU5, Q5EAC2, Q9XSG3, Q3ZS38, Q2T9Y6, Q24K02, Q0V8B6                                                                                                                                                                                                                                                                                                                                                                                                                                                                                                                     | 1472       | 26       | 8785      | 2.984035326     | 0.74576492  | 0.015269811 | 0.802322726 |
| GOTERM_BP_FAT | GO:0070647-protein modification by small protein conjugation or removal | 23    | 1.073261783 | 0.0004529 | Q3MHX6, Q0VC13, Q1R1M2, P63048, A3KN22, A1A4K3, Q1R1M1, Q3ZPA5, Q0VCP5, A7MB15, A2VDP1, Q3ZLN1, Q08E57, Q2HJ19, Q3ZPG3, P62992, Q08E63, Q3ZPF3, P61955, Q0P5I7, P23356, Q3ZCC3, Q0P5F4                                                                                                                                                                                                                                                                                                                                                                                                                                     | 1472       | 64       | 8785      | 2.144775391     | 0.751001039 | 0.015329145 | 0.814464901 |
| GOTERM_BP_FAT | GO:0019725-cellular homeostasis                                         | 56    | 2.613159123 | 0.0005714 | Q02399, Q1LZ90, P23196, Q3T0G8, Q9MYM4, Q01G5, A5P115, Q2K1K5, A6QL97, Q9T1J5, P57709, Q0Z7W6, P45478, Q3ZSK8, Q5E9M9, Q3ZCL8, Q5DA7, Q2TBU2, Q5E9B4, Q2KJ17, Q05B87, P37359, Q2HJF8, Q0P5E2, Q9B3C3, Q46414, Q9B31, Q46415, P15690, A6HT32, Q5E936, Q5EA61, Q0V8R6, P35705, P00442, Q3T0B1, A6QLL8, Q3T0S8, Q3MHF7, A6HT84, Q9N218, Q5E946, A6QLZ6, Q5E947, P79132, P10575, A5D7E8, Q3ZS38, Q3T0L2, Q77834, Q0VCU1, P00829, Q02703, A1A418, P20072, P18203                                                                                                                                                                | 1472       | 215      | 8785      | 1.554474216     | 0.826923388 | 0.019090394 | 1.026438675 |
| GOTERM_BP_FAT | GO:0006164-purine nucleotide biosynthetic process                       | 35    | 1.633224452 | 0.0005896 | A5PK70, Q2HJ58, Q00361, P11019, Q97681, P31408, Q3T0C6, Q59A32, P31404, P32876, A0INA3, Q3SZ18, Q3SWY3, P13620, P57709, P13621, P40682, Q08DA1, P05631, P22027, P05630, Q0VCK0, Q2HJ26, P52174, P52175, Q3T0Q4, Q8MKF1, Q0VC13, P21282, Q0VCY0, P56658, P13619, Q2KJB6, Q28851, P00829, Q28852, P61420                                                                                                                                                                                                                                                                                                                     | 1472       | 117      | 8785      | 1.785320281     | 0.836343108 | 0.019481465 | 1.059012604 |
| GOTERM_BP_FAT | GO:0010498-proteasome protein catabolic process                         | 11    | 0.513299113 | 0.0006118 | Q3MHX6, Q95M18, Q1R1M2, Q3ZCF7, Q71SS4, Q3ZK12, Q3SX24, Q3ZPF3, P62194, Q29RK4, Q0P594                                                                                                                                                                                                                                                                                                                                                                                                                                                                                                                                     | 1472       | 20       | 8785      | 3.282438859     | 0.847149157 | 0.019994109 | 1.098759833 |
| GOTERM_BP_FAT | GO:0034599-cellular response to oxidative stress                        | 11    | 0.513299113 | 0.0006118 | Q3T0C8, Q5SDT4, Q9BGC3, Q3MHF7, P00435, Q9BGC1, P00442, P35705, P00432, Q59HJ6, Q5E947, P37359                                                                                                                                                                                                                                                                                                                                                                                                                                                                                                                             | 1472       | 20       | 8785      | 3.282438859     | 0.847149157 | 0.019994109 | 1.098759833 |
| GOTERM_BP_FAT | GO:0016126-sterol biosynthetic process                                  | 11    | 0.513299113 | 0.0006118 | P07514, Q5E9T8, Q5SDH7, Q8WMY2, A6QR14, Q8WMV1, Q3ZBE9, Q1LZ95, A4FUD2, P84466, Q5E9J5                                                                                                                                                                                                                                                                                                                                                                                                                                                                                                                                     | 1472       | 20       | 8785      | 3.282438859     | 0.847149157 | 0.019994109 | 1.098759833 |
| GOTERM_BP_FAT | GO:0043161-proteasome ubiquitin-dependent protein catabolic process     | 11    | 0.513299113 | 0.0006118 | Q3MHX6, Q95M18, Q1R1M2, Q3ZCF7, Q71SS4, Q3ZK12, Q3SX24, Q3ZPF3, P62194, Q29RK4, Q0P594                                                                                                                                                                                                                                                                                                                                                                                                                                                                                                                                     | 1472       | 20       | 8785      | 3.282438859     | 0.847149157 | 0.019994109 | 1.098759833 |

| Category      | Term                                                                      | Count | %           | PValue    | Genes                                                                                                                                                                                                                                                                                                                                                                                                                                                                                                                                                                    | List Total | Pop Hits | Pop Total | Fold Enrichment | Bonferroni  | Benjamini   | FDR         |
|---------------|---------------------------------------------------------------------------|-------|-------------|-----------|--------------------------------------------------------------------------------------------------------------------------------------------------------------------------------------------------------------------------------------------------------------------------------------------------------------------------------------------------------------------------------------------------------------------------------------------------------------------------------------------------------------------------------------------------------------------------|------------|----------|-----------|-----------------|-------------|-------------|-------------|
| GOTERM_BP_FAT | GO:0030262-apoptotic nuclear changes                                      | 8     | 0.373308446 | 0.0006421 | Q95KV7, P45478, Q0VC37, P00442, P38447, O02703, Q08DY9, Q58CZ0                                                                                                                                                                                                                                                                                                                                                                                                                                                                                                           | 1472       | 11       | 8785      | 4.34041502      | 0.860710004 | 0.020751838 | 1.15279248  |
| GOTERM_BP_FAT | GO:0008064-regulation of actin polymerization or depolymerization         | 13    | 0.606626225 | 0.0006818 | Q32LP2, Q5E997, A4FUAR, Q5E963, Q3T035, Q1LZB2, Q3MHR7, Q5E9D5, Q58CQ2, Q1JP79, P61157, Q3SYX9, P62998                                                                                                                                                                                                                                                                                                                                                                                                                                                                   | 1472       | 27       | 8785      | 2.873515499     | 0.876684866 | 0.021790781 | 1.223954512 |
| GOTERM_BP_FAT | GO:0030832-regulation of actin filament length                            | 13    | 0.606626225 | 0.0006818 | Q32LP2, Q5E997, A4FUAR, Q5E963, Q3T035, Q1LZB2, Q3MHR7, Q5E9D5, Q58CQ2, Q1JP79, P61157, Q3SYX9, P62998                                                                                                                                                                                                                                                                                                                                                                                                                                                                   | 1472       | 27       | 8785      | 2.873515499     | 0.876684866 | 0.021790781 | 1.223954512 |
| GOTERM_BP_FAT | GO:0006414-translational elongation                                       | 9     | 0.419972002 | 0.0007018 | P68103, Q3SZV3, Q95140, P49410, Q56K14, A3KN48, P43896, Q5E983, P42899                                                                                                                                                                                                                                                                                                                                                                                                                                                                                                   | 1472       | 14       | 8785      | 3.836616848     | 0.884040358 | 0.022192877 | 1.259321202 |
| GOTERM_BP_FAT | GO:0042775-mitochondrial ATP synthesis coupled electron transport         | 9     | 0.419972002 | 0.0007018 | Q3T0C8, P31800, Q02372, Q05752, Q02827, Q6QTQ5, Q6QTH0, P52505, P00129                                                                                                                                                                                                                                                                                                                                                                                                                                                                                                   | 1472       | 14       | 8785      | 3.836616848     | 0.884040358 | 0.022192877 | 1.259321202 |
| GOTERM_BP_FAT | GO:0015985-energy coupled proton transport, down electrochemical gradient | 17    | 0.793280448 | 0.000747  | P40682, P05G31, P05630, Q00361, P11019, O97681, P21282, P31408, P13619, P32876, P31404, Q2KJ66, P00829, Q28852, P61420, P13620, P13621                                                                                                                                                                                                                                                                                                                                                                                                                                   | 1472       | 42       | 8785      | 2.415647645     | 0.899082123 | 0.023366471 | 1.339982857 |
| GOTERM_BP_FAT | GO:0015986-ATP synthesis coupled proton transport                         | 17    | 0.793280448 | 0.000747  | P40682, P05G31, P05630, Q00361, P11019, O97681, P21282, P31408, P13619, P32876, P31404, Q2KJ66, P00829, Q28852, P61420, P13620, P13621                                                                                                                                                                                                                                                                                                                                                                                                                                   | 1472       | 42       | 8785      | 2.415647645     | 0.899082123 | 0.023366471 | 1.339982857 |
| GOTERM_BP_FAT | GO:0034621-cellular macromolecular complex subunit organization           | 53    | 2.473168455 | 0.0007715 | Q02399, Q0I87, A1A48, Q2HJ2, A6H767, P84227, Q3S2S9, Q5E9H5, Q32L01, A6QP16, Q17QJ0, Q3MHM5, A7YWD2, Q2T9P4, Q86211, Q0VC36, P42028, Q2HJ86, P48427, Q64719, Q2TA40, A0INQ6, Q17Q8C, Q2T9S0, A6QNM2, Q08E52, Q3T116, Q3T122, Q9TU47, Q17Q89, P52193, A6H784, A5D9D4, A6QNT3, A1L5A6, Q32KM1, Q0VCX5, Q0P5F2, Q3HNG7, Q5E9F8, Q9TR30, Q2KJ00, Q3ZC17, Q76LV2, P81947, Q02375, A7YY75, Q08DE0, A1A48, A4FUH5, Q148J6, Q2NL24, Q95107                                                                                                                                       | 1472       | 203      | 8785      | 1.558166229     | 0.906406597 | 0.023881593 | 1.383696665 |
| GOTERM_BP_FAT | GO:0000280-nuclear division                                               | 26    | 1.21325245  | 0.0007886 | Q2YD10, Q2TA25, Q32PA5, A6QM04, Q3ZBK3, Q17Q82, Q0P5L6, P48734, Q3SZP2, Q2NKY7, Q58D97, Q08DR9, A6H7B3, Q3B7M6, Q1JQB2, Q2TBN3, Q24Y3, Q3SZY3, Q05B84, P62285, Q3T054, A7YY75, Q0P5A1, Q3ZBD9, Q3ZCF0, Q1LZG6                                                                                                                                                                                                                                                                                                                                                            | 1472       | 79       | 8785      | 1.964175151     | 0.911179242 | 0.024159285 | 1.414055902 |
| GOTERM_BP_FAT | GO:0007067-mitosis                                                        | 26    | 1.21325245  | 0.0007886 | Q2YD10, Q2TA25, Q32PA5, A6QM04, Q3ZBK3, Q17Q82, Q0P5L6, P48734, Q3SZP2, Q2NKY7, Q58D97, Q08DR9, A6H7B3, Q3B7M6, Q1JQB2, Q2TBN3, Q24Y3, Q3SZY3, Q05B84, P62285, Q3T054, A7YY75, Q0P5A1, Q3ZBD9, Q3ZCF0, Q1LZG6                                                                                                                                                                                                                                                                                                                                                            | 1472       | 79       | 8785      | 1.964175151     | 0.911179242 | 0.024159285 | 1.414055902 |
| GOTERM_BP_FAT | GO:0032956-regulation of actin cytoskeleton organization                  | 14    | 0.653289781 | 0.0008063 | Q32LP2, Q5E997, A4FUAR, Q5E963, Q3T035, Q1LZB2, Q3MHR7, P61585, Q5E9D5, Q58CQ2, Q1JP79, P61157, Q3SYX9, P62998                                                                                                                                                                                                                                                                                                                                                                                                                                                           | 1472       | 31       | 8785      | 2.695277714     | 0.915892853 | 0.024452705 | 1.445671985 |
| GOTERM_BP_FAT | GO:0006397-mRNA processing                                                | 39    | 1.819878675 | 0.0009125 | Q17QI2, Q5E959, Q3MHX3, Q24Z8, Q2KJ0, Q5E992, Q3ZBV3, Q5E9Z8, Q3SZR8, Q3ZBK6, A5D7H5, P09867, Q3ZCE0, Q0P5D2, Q2HJ60, P61286, A1A4K8, Q3ZP69, Q2R9H4, Q3ZCA2, Q3T147, Q5E911, Q3T0D0, P67808, A0IN52, Q3T106, Q3B8S0, Q3SYR3, Q3MHR5, P79101, Q2KIR1, A4FQ7L, Q3MHE2, Q2KJ71, Q2NL22, Q10568, Q1RMR2, Q0VCY7                                                                                                                                                                                                                                                             | 1472       | 138      | 8785      | 1.686628663     | 0.939293969 | 0.027358512 | 1.634500505 |
| GOTERM_BP_FAT | GO:0009309-amine biosynthetic process                                     | 20    | 0.933271115 | 0.0010147 | Q2NL31, Q58DW2, Q5EA40, Q2KH7, A7E3T7, A4IFQ7, Q0VD27, Q2KHU0, A7YWE4, P33097, Q1LZA3, P12344, Q3T0C8, Q8SDT4, A0IN4, Q58D08, Q4UJ3, Q3ZSA5, P00376, Q3SZJ0                                                                                                                                                                                                                                                                                                                                                                                                              | 1472       | 55       | 8785      | 2.17020751      | 0.955650124 | 0.030083742 | 1.815979438 |
| GOTERM_BP_FAT | GO:0032446-protein modification by small protein conjugation              | 20    | 0.933271115 | 0.0010147 | Q3MHX6, Q0VCL3, Q1RMX2, P63048, A3KN22, A1A4K3, Q1RMW1, Q32PA5, Q0VCP5, A7MBJ5, A2VDP1, Q3ZLN1, Q2HJ9, P62992, Q08E63, Q3ZP63, P61955, Q0P5T7, Q3ZCC3, Q0P5F4                                                                                                                                                                                                                                                                                                                                                                                                            | 1472       | 55       | 8785      | 2.17020751      | 0.955650124 | 0.030083742 | 1.815979438 |
| GOTERM_BP_FAT | GO:0009144-purine nucleoside triphosphate metabolic process               | 30    | 1.399906673 | 0.0010574 | P00570, A5PK70, Q00361, P11019, O97681, Q2HJ33, P31408, Q3T0C6, P32876, P31404, P13620, P13621, P5709, P40682, Q08DA1, P05631, P22027, P05630, P52174, P52175, Q3T0Q4, P21282, Q0VCY0, P56658, P13619, Q59H46, P15690, Q28851, Q2KJ66, P00829, Q28852, P61420                                                                                                                                                                                                                                                                                                            | 1472       | 98       | 8785      | 1.826960404     | 0.9611105   | 0.031032854 | 1.891829724 |
| GOTERM_BP_FAT | GO:0022403-cell cycle phase                                               | 39    | 1.819878675 | 0.0010576 | Q2YD10, Q2TA25, Q32PA5, A6QM04, Q3ZBK3, Q17Q82, Q0P5L6, P48734, Q0I23, Q3SZP2, Q2NKY7, Q2HJG1, Q58D97, Q08DR9, A5D7H5, Q3B7M6, A6H7B3, Q0VCV0, Q1RMH9, Q1JQB2, Q3T0M7, P53712, Q2TBN3, Q3HNG7, Q24Y3, Q3SZY3, Q2KJ00, Q05B84, Q2KJ11, Q86211, Q5E964, P62285, Q3T054, A7YY75, Q0P5A1, Q08DQ9, Q3ZBD9, Q3ZCF0, Q1LZG6                                                                                                                                                                                                                                                     | 1472       | 139      | 8785      | 1.674494643     | 0.961132606 | 0.030744394 | 1.892157854 |
| GOTERM_BP_FAT | GO:0032970-regulation of actin filament-based process                     | 14    | 0.653289781 | 0.0011523 | Q32LP2, Q5E997, A4FUAR, Q5E963, Q3T035, Q1LZB2, Q3MHR7, P61585, Q5E9D5, Q58CQ2, Q1JP79, P61157, Q3SYX9, P62998                                                                                                                                                                                                                                                                                                                                                                                                                                                           | 1472       | 32       | 8785      | 2.61103091      | 0.970943965 | 0.033138748 | 2.05990546  |
| GOTERM_BP_FAT | GO:0006995-cholesterol biosynthetic process                               | 10    | 0.466635558 | 0.0011556 | P07514, Q5E9T8, Q8WMY2, A6QR14, Q8WMV1, Q3ZBE9, Q1LZ95, A4FUD2, P84466, Q5E915                                                                                                                                                                                                                                                                                                                                                                                                                                                                                           | 1472       | 18       | 8785      | 3.315594807     | 0.971235288 | 0.032923247 | 2.065710561 |
| GOTERM_BP_FAT | GO:0006997-nucleus organization                                           | 10    | 0.466635558 | 0.0011556 | A6QNZ5, Q95KV7, P45478, A7YY75, Q0VC37, P00442, P38447, O02703, Q08DY9, Q58CZ0                                                                                                                                                                                                                                                                                                                                                                                                                                                                                           | 1472       | 18       | 8785      | 3.315594807     | 0.971235288 | 0.032923247 | 2.065710561 |
| GOTERM_BP_FAT | GO:0006503-macromolecular complex assembly                                | 70    | 3.266448903 | 0.0012111 | Q02399, Q3T0N9, Q0I87, Q58D72, Q0P5L6, A1A48, Q2HJ2, Q0I85, A6H767, P84227, P18346, Q3S2S9, Q32L01, Q5E9H5, A6QP16, A2VDS5, Q17QJ0, P80177, Q3MHM5, A7YWD2, Q86211, Q0VC36, P42028, Q2KJF9, Q2HJ86, P48427, Q64719, Q3ZBD3, A1L567, Q3ZC55, Q2TA40, A0INQ6, Q17Q8C, Q5EA65, Q2T9S0, Q1RMV0, Q08E52, Q9TU47, Q3T122, Q17Q89, P52193, A6H784, A5D9D4, A6QNT3, A1L5A6, Q32KM1, Q0VCX5, Q3ZK11, Q0P5F2, Q5E9F8, Q3HNG7, P01096, Q9TR30, P00342, Q2KJ00, Q3ZC17, Q76LV2, P81947, P79132, A6QLR8, Q02375, A0IN4, Q08DE0, Q59HJ6, O02703, A1A48, A4FUH5, Q148J6, Q2NL24, Q95107 | 1472       | 291      | 8785      | 1.43561837      | 0.975739606 | 0.034159111 | 2.163767657 |
| GOTERM_BP_FAT | GO:0016054-organic acid catabolic process                                 | 21    | 0.979934671 | 0.0012565 | Q0IIL6, Q5EA40, P25285, Q3SZ00, Q1RMV0, P00366, Q3MHL4, Q3ZCF2, Q3SZP5, A4IFQ7, Q46504, P20821, P33097, P12344, Q0NXX6, P21839, A4FUD0, Q2KIG0, Q2T9V8, Q2HJ73, Q3SZB4                                                                                                                                                                                                                                                                                                                                                                                                   | 1472       | 60       | 8785      | 2.08824728      | 0.978901808 | 0.035096788 | 2.244106011 |
| GOTERM_BP_FAT | GO:0046395-carboxylic acid catabolic process                              | 21    | 0.979934671 | 0.0012565 | Q0IIL6, Q5EA40, P25285, Q3SZ00, Q1RMV0, P00366, Q3MHL4, Q3ZCF2, Q3SZP5, A4IFQ7, Q46504, P20821, P33097, P12344, Q0NXX6, P21839, A4FUD0, Q2KIG0, Q2T9V8, Q2HJ73, Q3SZB4                                                                                                                                                                                                                                                                                                                                                                                                   | 1472       | 60       | 8785      | 2.08824728      | 0.978901808 | 0.035096788 | 2.244106011 |
| GOTERM_BP_FAT | GO:0008219-cell death                                                     | 54    | 2.519832011 | 0.001259  | Q95KV7, Q2KJ78, Q5E9L4, Q5E9C2, A0JNK3, P56541, Q3T0K8, Q58CZ0, P45478, Q5E9M9, Q645M6, Q0VC36, Q29RZ9, P43481, Q2HJF8, Q0VC37, Q0I48, Q2HJF6, Q0P5M9, P15690, Q08DY9, Q0V882, Q3SX43, P00442, Q2KJ62, Q3T0P5, Q3ZBT1, Q3ZKL9, Q3ZLM0, Q0I26, Q3ZLE4, Q3T0I5, P38447, Q5E9J6, Q3ZB65, Q29R14, Q2NL36, Q0VCX4, P82922, P45879, Q0P5F4, A6QQW8, P00435, A7E3S4, P32007, Q3T169, Q1JQC5, A4IF78, Q08DE0, Q2HJH9, Q5EA7C, O02703, Q2NL24, Q0I88                                                                                                                              | 1472       | 212      | 8785      | 1.52016894      | 0.979062163 | 0.034848023 | 2.248492977 |
| GOTERM_BP_FAT | GO:0016265-death                                                          | 55    | 2.566495567 | 0.0012747 | Q95KV7, Q2KJ78, Q5E9L4, Q5E9C2, A0JNK3, P56541, Q3T0K8, Q58CZ0, P45478, Q5E9M9, Q645M6, Q0VC36, Q2KJ71, Q29RZ9, P43481, Q2HJF8, Q0VC37, Q0I48, Q2HJF6, Q0P5M9, P15690, Q08DY9, Q0V882, Q3SX43, P00442, Q2KJ62, Q3T0P5, Q3ZBT1, Q3ZKL9, Q3ZLM0, Q0I26, Q3ZLE4, Q3T0I5, P38447, Q5E9J6, Q3ZB65, Q29R14, Q2NL36, Q0VCX4, P82922, P45879, Q0P5F4, A6QQW8, P00435, A7E3S4, P32007, Q3T169, Q1JQC5, A4IF78, Q08DE0, Q2HJH9, Q5EA7C, O02703, Q2NL24, Q0I88                                                                                                                      | 1472       | 217      | 8785      | 1.512644635     | 0.980050332 | 0.034960989 | 2.276287116 |
| GOTERM_BP_FAT | GO:0006888-ER to Golgi vesicle-mediated transport                         | 9     | 0.419972002 | 0.001284  | Q17QI1, A2VDS5, Q17QI5, Q3SZN2, Q3T0F2, Q3T000, Q0P5L6, A6QNT8, Q2TBL9                                                                                                                                                                                                                                                                                                                                                                                                                                                                                                   | 1472       | 15       | 8785      | 3.580842391     | 0.980611239 | 0.034899539 | 2.292679157 |
| GOTERM_BP_FAT | GO:0042375-quinone cofactor metabolic process                             | 8     | 0.373308446 | 0.0013186 | Q3SZD7, Q3T131, Q58CW1, Q6B4J2, Q2KJL4, Q0P5A2, A6QRO5, Q2NL34                                                                                                                                                                                                                                                                                                                                                                                                                                                                                                           | 1472       | 12       | 8785      | 3.978713768     | 0.982567199 | 0.035509574 | 2.353776816 |
| GOTERM_BP_FAT | GO:0000278-mitotic cell cycle                                             | 33    | 1.53899734  | 0.0013587 | Q2YD10, Q2TA06, Q2TA25, Q32PA5, A6QM04, Q3ZBK3, Q17Q82, Q0P5L6, P48734, Q3SZP2, Q2NKY7, Q58D97, Q08DR9, A5D7H5, Q3B7M6, A6H7B3, Q1RMH9, Q1JQB2, P53712, Q2TBN3, Q24Y3, Q3SZY3, Q05B84, Q86211, P62285, Q3T054, A7YY75, Q0P5A1, Q08DQ9, Q3ZBD9, Q3ZCF0, Q0P5I7, Q1LZG6                                                                                                                                                                                                                                                                                                    | 1472       | 113      | 8785      | 1.74288789      | 0.984589765 | 0.036253278 | 2.424583376 |
| GOTERM_BP_FAT | GO:0009064-glutamine family amino acid metabolic process                  | 14    | 0.653289781 | 0.0016137 | A7YWG4, Q58DL1, P00366, Q2KH7, P33097, A7YWE4, Q1LZA3, P12344, Q8SDT4, Q3S2S9, Q2T9Y6, Q58D08, Q1RMS2, Q3SZJ0                                                                                                                                                                                                                                                                                                                                                                                                                                                            | 1472       | 33       | 8785      | 2.531908762     | 0.992961905 | 0.042545758 | 2.87332545  |

| Category      | Term                                                            | Count | %           | PValue    | Genes                                                                                                                                                                                                                                                                                                                                                                                                                                                                                                                                                                                                                                                       | List Total | Pop Hits | Pop Total | Fold Enrichment | Bonferroni  | Benjamini   | FDR         |
|---------------|-----------------------------------------------------------------|-------|-------------|-----------|-------------------------------------------------------------------------------------------------------------------------------------------------------------------------------------------------------------------------------------------------------------------------------------------------------------------------------------------------------------------------------------------------------------------------------------------------------------------------------------------------------------------------------------------------------------------------------------------------------------------------------------------------------------|------------|----------|-----------|-----------------|-------------|-------------|-------------|
| GOTERM_BP_FAT | GO:0033554-cellular response to stress                          | 58    | 2.706486234 | 0.001624  | A2VDZ9, P40673, P18493, Q71SS4, O02776, A6QLA6, P23196, P48734, A4FV00, Q29RK4, Q3T0G8, Q5SD18, Q41515, A4IFC8, Q0VCY0, Q28141, P88102, Q2ZB19, A5PBN2, Q3SZY3, Q3ZBW4, Q0VC36, A7YY55, P37359, Q9BC13, Q9BC11, Q2TBU9, Q08DY9, Q5E9N5, Q3M024, Q3MH46, Q3MHX6, Q5SDB5, Q17QGR, A1A4K3, P35705, P00442, Q3ZBT1, Q08E57, Q3MH17, Q1LZA3, Q5SDT4, Q3MHF7, Q3S243, A5D7V1, Q0WCT3, Q2NL37, A6Q0W8, P00435, P00432, Q3T169, Q0P5K3, Q27965, Q5E947, A0INB1, P10103, A6QLT9, Q59HJ6, O02703                                                                                                                                                                      | 1472       | 234      | 8785      | 1.479265375     | 0.993181184 | 0.042447297 | 2.891433854 |
| GOTERM_BP_FAT | GO:0034220-ion transmembrane transport                          | 17    | 0.793280448 | 0.0017622 | P40682, P05631, P05630, Q00361, P11019, O97681, P21282, P31408, P13619, P32876, P31404, Q2KJB6, P00829, Q28852, P61420, P13620, P13621                                                                                                                                                                                                                                                                                                                                                                                                                                                                                                                      | 1472       | 45       | 8785      | 2.254604469     | 0.995541364 | 0.045591057 | 3.133804443 |
| GOTERM_BP_FAT | GO:0022402-cell cycle process                                   | 47    | 2.193187121 | 0.0017961 | P00570, Q2YD10, Q2TA25, Q32PA5, Q3ZBK3, A6QM04, Q17QG2, P48734, Q0P5L6, Q0H23, Q3SZP2, Q2KH13, Q2NKY7, Q2HJG1, Q5SD97, P52193, Q08D99, A5D7V1, Q3B7M6, A6H7B3, Q0VCV0, Q1RHM9, Q1JQB2, Q3TUM7, P53712, Q0VCX4, Q2TBN3, Q3HNG7, Q24Y3, Q3SZY3, Q2KJD0, Q05B84, Q2KJ11, Q86211, Q5E964, P62285, Q3SWZ6, Q3T054, P79126, A7YY75, Q08DE0, Q0P5A1, Q08DQ9, Q3ZBD9, Q27991, Q3ZCF0, Q1LZG6                                                                                                                                                                                                                                                                        | 1472       | 181      | 8785      | 1.549720004     | 0.995982974 | 0.046061115 | 3.193215094 |
| GOTERM_BP_FAT | GO:0030833-regulation of actin filament polymerization          | 12    | 0.559962669 | 0.0018597 | Q3ZLP2, Q5E997, Q1LZB2, Q3MHR7, A4FUAR, Q58CQ2, Q5E963, Q3SYX9, P61157, Q1JP79, Q3T035, P62998                                                                                                                                                                                                                                                                                                                                                                                                                                                                                                                                                              | 1472       | 26       | 8785      | 2.754494147     | 0.99669612  | 0.04725916  | 3.304443388 |
| GOTERM_BP_FAT | GO:0022411-cellular component disassembly                       | 10    | 0.466635558 | 0.0018752 | P45478, Q0VC37, P00442, P38447, A6QNM2, O02703, Q3T116, Q08DY9, Q0VCX5, Q58CZ0                                                                                                                                                                                                                                                                                                                                                                                                                                                                                                                                                                              | 1472       | 19       | 8785      | 3.141089817     | 0.996819184 | 0.04717547  | 3.32603164  |
| GOTERM_BP_FAT | GO:0009161-ribonucleoside monophosphate metabolic process       | 10    | 0.466635558 | 0.0018752 | Q05927, Q0VC00, Q2HJ58, P56658, Q59A32, Q2HJ26, A0JNA3, P31754, Q3SWY3, Q5QVC13                                                                                                                                                                                                                                                                                                                                                                                                                                                                                                                                                                             | 1472       | 19       | 8785      | 3.141089817     | 0.996819184 | 0.04717547  | 3.32603164  |
| GOTERM_BP_FAT | GO:0051656-establishment of organelle localization              | 10    | 0.466635558 | 0.0018752 | Q56K10, Q2HJF8, Q2YD10, A7YY75, Q08D99, Q5E9M9, Q3T000, Q5E971, Q27991, A6QLB1                                                                                                                                                                                                                                                                                                                                                                                                                                                                                                                                                                              | 1472       | 19       | 8785      | 3.141089817     | 0.996819184 | 0.04717547  | 3.32603164  |
| GOTERM_BP_FAT | GO:0046034-ATP metabolic process                                | 27    | 1.259916006 | 0.0019234 | P00570, P40682, Q08DA1, P22027, P05631, P05630, Q00361, P11019, Q2HJ33, Q97681, P21282, P31408, Q3T0C6, Q0VCY0, P13619, Q59HJ6, P31404, P32876, P15690, Q2KJB6, Q28851, P00829, Q28852, P61420, P13620, P57709, P13621                                                                                                                                                                                                                                                                                                                                                                                                                                      | 1472       | 88       | 8785      | 1.831112586     | 0.997283802 | 0.048045161 | 3.415782593 |
| GOTERM_BP_FAT | GO:0009205-purine ribonucleoside triphosphate metabolic process | 29    | 1.353243117 | 0.0019338 | P00570, A5PK70, Q00361, P11019, O97681, Q2HJ33, P31408, Q3T0C6, P32876, P31404, P13620, P13621, P57709, P40682, Q08DA1, P05631, P22027, P05630, P52174, P52175, Q3T0Q4, P21282, Q0VCY0, P13619, Q59HJ6, P15690, Q28851, Q2KJB6, P00829, Q28852, P61420                                                                                                                                                                                                                                                                                                                                                                                                      | 1472       | 97       | 8785      | 1.784268545     | 0.997369676 | 0.04791053  | 3.434032595 |
| GOTERM_BP_FAT | GO:0009199-ribonucleoside triphosphate metabolic process        | 29    | 1.353243117 | 0.0019338 | P00570, A5PK70, Q00361, P11019, O97681, Q2HJ33, P31408, Q3T0C6, P32876, P31404, P13620, P13621, P57709, P40682, Q08DA1, P05631, P22027, P05630, P52174, P52175, Q3T0Q4, P21282, Q0VCY0, P13619, Q59HJ6, P15690, Q28851, Q2KJB6, P00829, Q28852, P61420                                                                                                                                                                                                                                                                                                                                                                                                      | 1472       | 97       | 8785      | 1.784268545     | 0.997369676 | 0.04791053  | 3.434032595 |
| GOTERM_BP_FAT | GO:0034660-miRNA metabolic process                              | 37    | 1.726551563 | 0.0019709 | A6QNM8, Q3ZBVR, Q05B50, O02991, A7YW98, Q3T087, A6H7F4, Q2KJG3, A5D7A2, A4FUC8, Q2KJF8, Q56XJ6, Q3MH14, A7MBC5, Q1JQB6, Q1RML6, A5E4P2, Q0P5H7, Q9CMB8, Q2KJAA, P17248, Q56K10, Q3T090, Q2TBO0, Q5SDW5, Q3T099, A6H7E1, Q0VC30, Q2K184, Q3SWZ6, A6QLT9, A7MBD4, Q3ZLK1, A6QLR2, A5D7C0, Q2T9L8, Q2NL22                                                                                                                                                                                                                                                                                                                                                      | 1472       | 134      | 8785      | 1.647900105     | 0.997653182 | 0.048417269 | 3.498791192 |
| GOTERM_BP_FAT | GO:0030036-actin cytoskeleton organization                      | 26    | 1.21325245  | 0.0020842 | Q5E997, A4FUAR, Q3ZCK2, A2VDK3, A2VDK6, Q3B7N2, Q1LZB2, P52193, P63258, Q2TA49, A6H720, A5D7D1, Q0VCF1, P53712, A5D789, P57709, Q3ZL52, Q3ZCL5, P31976, Q09430, Q3SYV4, P61585, Q27991, Q148J6, Q95107, Q1RMT6                                                                                                                                                                                                                                                                                                                                                                                                                                              | 1472       | 84       | 8785      | 1.847259964     | 0.998343342 | 0.050724796 | 3.696272307 |
| GOTERM_BP_FAT | GO:0007031-peroxisome organization                              | 9     | 0.419972002 | 0.0021935 | A1L567, Q0VCF2, Q2KJ17, Q148K5, Q1RMM0, Q3S2X3, Q3SZD1, P07857, A6QPK4                                                                                                                                                                                                                                                                                                                                                                                                                                                                                                                                                                                      | 1472       | 16       | 8785      | 3.357039742     | 0.998816462 | 0.052898267 | 3.886585499 |
| GOTERM_BP_FAT | GO:0043254-regulation of protein complex assembly               | 14    | 0.653289781 | 0.0022179 | Q3ZLP2, Q5E997, A4FUAR, Q5E963, Q3T035, Q1LZB2, P10103, Q3MHR7, Q3ZBD9, Q58CQ2, Q1JP79, P61157, Q3SYX9, P62998                                                                                                                                                                                                                                                                                                                                                                                                                                                                                                                                              | 1472       | 34       | 8785      | 2.457440857     | 0.99890208  | 0.053055412 | 3.929028969 |
| GOTERM_BP_FAT | GO:0051493-regulation of cytoskeleton organization              | 18    | 0.839944004 | 0.0022372 | Q3ZLP2, Q5E997, A4FUAR, Q5E963, Q3T035, Q3SWZ6, Q1LZB2, Q3MHR7, P61585, Q5E9D5, Q3ZBD9, Q3T0M7, Q58CQ2, Q3SYX9, Q0VCX4, Q1JP79, P61157, P62998                                                                                                                                                                                                                                                                                                                                                                                                                                                                                                              | 1472       | 50       | 8785      | 2.148505435     | 0.998965296 | 0.053091393 | 3.962531586 |
| GOTERM_BP_FAT | GO:0009141-nucleoside triphosphate metabolic process            | 31    | 1.446570229 | 0.0022384 | P00570, Q2NKU1, A5PK70, Q00361, P11019, O97681, Q2HJ33, P31408, Q3T0C6, P32876, P31404, P13620, P13621, P57709, P40682, Q08DA1, P05631, P22027, P05630, P52174, P52175, Q3T0Q4, P21282, Q0VCY0, P56658, P13619, Q59HJ6, P15690, Q2KJB6, Q28851, P00829, Q28852, P61420                                                                                                                                                                                                                                                                                                                                                                                      | 1472       | 107      | 8785      | 1.729067198     | 0.99896991  | 0.052712038 | 3.964615998 |
| GOTERM_BP_FAT | GO:0009108-coenzyme biosynthetic process                        | 17    | 0.793280448 | 0.0022892 | Q5ZBS0, Q5EAC2, Q1JQD7, Q3T131, Q3ZS38, Q0H59, Q2T9Y6, Q58CW1, A4FUD0, Q5E9T4, Q0P5C2, Q2KJL4, Q4UJ3, Q5B1P7, Q0P5A2, A6Q805, Q2NL34                                                                                                                                                                                                                                                                                                                                                                                                                                                                                                                        | 1472       | 46       | 8785      | 2.205591328     | 0.999118239 | 0.053467452 | 4.052849555 |
| GOTERM_BP_FAT | GO:0009116-nucleoside metabolic process                         | 16    | 0.746616892 | 0.0023104 | Q2NKU1, Q5ZBS0, A5PK70, Q05927, P5705, Q2HJ58, P52174, A7E3T7, A6H7F4, P52175, Q3T0Q4, Q56W4, A2VDS0, Q3MHF7, P56658, P31754, Q3S218, Q08DW2                                                                                                                                                                                                                                                                                                                                                                                                                                                                                                                | 1472       | 42       | 8785      | 2.273550725     | 0.999174031 | 0.05354386  | 4.089732147 |
| GOTERM_BP_FAT | GO:0033043-regulation of organelle organization                 | 24    | 1.119925338 | 0.0024329 | Q3ZLP2, Q2YD10, Q5E997, A4FUAR, Q0P5K3, Q5E963, Q3T035, Q3T0G8, Q3SWZ6, Q1LZB2, Q3MHR7, Q0VC37, P61585, Q5E9D5, Q3ZBD9, Q3T0M7, Q58CQ2, P11023, Q3SYX9, P61157, Q0VCX4, Q2NL24, Q1JP79, P62998                                                                                                                                                                                                                                                                                                                                                                                                                                                              | 1472       | 76       | 8785      | 1.88465389      | 0.999433217 | 0.055881983 | 4.301947867 |
| GOTERM_BP_FAT | GO:0008637-apoptotic mitochondrial changes                      | 8     | 0.373308446 | 0.0024458 | P00435, Q0VC36, O02703, Q08DY9, P82922, Q3ZL40, Q3ZL54, Q0P5F4                                                                                                                                                                                                                                                                                                                                                                                                                                                                                                                                                                                              | 1472       | 13       | 8785      | 3.672658863     | 0.999455333 | 0.055754403 | 4.324350849 |
| GOTERM_BP_FAT | GO:0009081-branched chain family amino acid metabolic process   | 7     | 0.32664489  | 0.0024837 | Q07536, Q5EA40, Q0NXX6, P21839, Q2HJ73, A4IFQ7, Q9TUM3                                                                                                                                                                                                                                                                                                                                                                                                                                                                                                                                                                                                      | 1472       | 10       | 8785      | 4.177649457     | 0.999515316 | 0.05617856  | 4.389991605 |
| GOTERM_BP_FAT | GO:0006921-cell structure disassembly during apoptosis          | 7     | 0.32664489  | 0.0024837 | P45478, Q0VC37, P00442, P38447, O02703, Q08DY9, Q58CZ0                                                                                                                                                                                                                                                                                                                                                                                                                                                                                                                                                                                                      | 1472       | 10       | 8785      | 4.177649457     | 0.999515316 | 0.05617856  | 4.389991605 |
| GOTERM_BP_FAT | GO:0006309-DNA fragmentation involved in apoptosis              | 7     | 0.32664489  | 0.0024837 | P45478, Q0VC37, P00442, P38447, O02703, Q08DY9, Q58CZ0                                                                                                                                                                                                                                                                                                                                                                                                                                                                                                                                                                                                      | 1472       | 10       | 8785      | 4.177649457     | 0.999515316 | 0.05617856  | 4.389991605 |
| GOTERM_BP_FAT | GO:0032271-regulation of protein polymerization                 | 13    | 0.606626225 | 0.0028822 | Q3ZLP2, Q5E997, A4FUAR, Q5E963, Q3T035, Q1LZB2, Q3MHR7, Q3ZBD9, Q58CQ2, Q1JP79, P61157, Q3SYX9, P62998                                                                                                                                                                                                                                                                                                                                                                                                                                                                                                                                                      | 1472       | 31       | 8785      | 2.502739306     | 0.999857815 | 0.064434755 | 5.077212091 |
| GOTERM_BP_FAT | GO:0030029-actin filament-based process                         | 26    | 1.21325245  | 0.0029682 | Q5E997, A4FUAR, Q3ZCK2, A2VDK3, A2VDK6, Q3B7N2, Q1LZB2, P52193, P63258, Q2TA49, A6H720, A5D7D1, Q0VCF1, P53712, A5D789, P57709, Q3ZL52, Q3ZCL5, P31976, Q09430, Q3SYV4, P61585, Q27991, Q148J6, Q95107, Q1RMT6                                                                                                                                                                                                                                                                                                                                                                                                                                              | 1472       | 86       | 8785      | 1.80430043      | 0.999890882 | 0.065816749 | 5.224888123 |
| GOTERM_BP_FAT | GO:0042592-homeostatic process                                  | 80    | 3.733084461 | 0.0031431 | Q02399, P18493, Q1LZV0, P23196, Q95KV0, Q3T0G8, A6QNZ5, Q9MYM4, Q0H65, P56541, A5P1J5, Q0VCV0, Q2KJL5, A6QL97, Q9SKU9, Q9T1J5, P57709, Q2T7W6, Q5E9M8, P45478, Q0VCM4, Q3SZK8, Q5E9M9, Q3ZCL8, Q5SDA7, Q5E9B4, Q2TBU2, Q29R19, Q2KJ17, A7MBD4, Q9TUM3, P33097, Q05B87, P37359, Q9BQ2, Q2HJF8, Q9BC13, Q46414, Q9BC11, Q46415, P15690, A6H732, Q08DY9, Q5E936, Q5E6A1, Q0V8R6, Q5E995, P00442, P35705, Q3T0E0, Q3T058, A6QLL8, Q5SD97, Q3MHF7, Q148D3, A6H784, Q0VCT3, A4FV58, Q9N2R, Q0VCX4, P00435, Q5E946, Q27965, A6QLZ6, Q5E947, P79132, A3KN17, P10575, A5D7E8, Q3ZS38, O77834, Q3T0L2, Q0VCU1, Q0V8B6, P19035, P00829, O02703, A1A4J8, P20072, P18203 | 1472       | 353      | 8785      | 1.352523502     | 0.999936302 | 0.069064826 | 5.524497273 |
| GOTERM_BP_FAT | GO:0006631-fatty acid metabolic process                         | 32    | 1.493233784 | 0.0032043 | Q3TOR7, Q58DK1, Q58DM8, Q1RMM0, P48818, Q5E956, Q0VCA7, O46629, Q3SZP5, Q2KJG4, Q10904, Q7YS70, Q3T0G8, P58108, P52505, A5P1C5, P80177, Q0H16, Q58DN7, Q3SZ00, O77774, P31322, A6H7G3, Q5EAD4, Q9TUM3, Q3MHR0, Q2KJG0, A4IFM2, Q2KJ17, Q3ZBF7, Q3ZBY7, Q3SZB4                                                                                                                                                                                                                                                                                                                                                                                               | 1472       | 114      | 8785      | 1.675247902     | 0.999947235 | 0.069863611 | 5.629086875 |
| GOTERM_BP_FAT | GO:0045116-protein neddylation                                  | 5     | 0.233317779 | 0.0033937 | A3KN22, Q1RMM1, Q0P5T7, Q2HJ9, Q0P5F4                                                                                                                                                                                                                                                                                                                                                                                                                                                                                                                                                                                                                       | 1472       | 5        | 8785      | 5.968070652     | 0.999970552 | 0.073325099 | 5.952279209 |
| GOTERM_BP_FAT | GO:0044272-sulfur compound biosynthetic process                 | 11    | 0.513299113 | 0.0034131 | Q2NL31, Q58DW2, Q3ZS38, Q2T9Y6, Q5E9T4, Q4UJ3, Q5B1P7, A7E3T7, Q0VD27, Q5EAC2, O18756                                                                                                                                                                                                                                                                                                                                                                                                                                                                                                                                                                       | 1472       | 24       | 8785      | 2.73536716      | 0.999972262 | 0.073215408 | 5.985365101 |
| GOTERM_BP_FAT | GO:0009156-ribonucleoside monophosphate biosynthetic process    | 9     | 0.419972002 | 0.0035407 | Q0VC00, Q2HJ58, P56658, Q59A32, Q2HJ26, A0JNA3, P31754, Q3SWY3, Q0VC13                                                                                                                                                                                                                                                                                                                                                                                                                                                                                                                                                                                      | 1472       | 17       | 8785      | 3.159566816     | 0.999981274 | 0.075325258 | 6.202376193 |

| Category      | Term                                                                     | Count | %           | PValue    | Genes                                                                                                                                                                                                                                                                                                                                                                                                                                                                                                       | List Total | Pop Hits | Pop Total | Fold Enrichment | Bonferroni  | Benjamini   | FDR         |
|---------------|--------------------------------------------------------------------------|-------|-------------|-----------|-------------------------------------------------------------------------------------------------------------------------------------------------------------------------------------------------------------------------------------------------------------------------------------------------------------------------------------------------------------------------------------------------------------------------------------------------------------------------------------------------------------|------------|----------|-----------|-----------------|-------------|-------------|-------------|
| GOTERM_BP_FAT | GO:0051640-organelle localization                                        | 12    | 0.559962669 | 0.0037413 | Q56K10, Q2HF8, Q2YD10, A7YY75, Q08DR9, Q5E9M9, Q3T000, Q5E971, A5D9D4, Q27991, P62285, A6QLB1                                                                                                                                                                                                                                                                                                                                                                                                               | 1472       | 28       | 8785      | 2.557744565     | 0.999989905 | 0.078882643 | 6.542681352 |
| GOTERM_BP_FAT | GO:0009126-purine nucleoside monophosphate metabolic process             | 8     | 0.373308446 | 0.0041898 | Q05927, Q0VCK0, P56658, Q59A32, Q2HJ26, A0JNA3, Q3SWY3, Q0VC13                                                                                                                                                                                                                                                                                                                                                                                                                                              | 1472       | 14       | 8785      | 3.410326087     | 0.999997466 | 0.087335386 | 7.299353413 |
| GOTERM_BP_FAT | GO:0042542-response to hydrogen peroxide                                 | 8     | 0.373308446 | 0.0041898 | Q9BGE3, Q3MHF7, P00435, P00442, P35705, P00432, Q5E946, Q5E947, Q0P594                                                                                                                                                                                                                                                                                                                                                                                                                                      | 1472       | 14       | 8785      | 3.410326087     | 0.999997466 | 0.087335386 | 7.299353413 |
| GOTERM_BP_FAT | GO:0034614-cellular response to reactive oxygen species                  | 8     | 0.373308446 | 0.0041898 | Q9BGE3, Q3MHF7, P00435, Q9BGI1, P00442, P35705, P00432, Q5E947, P37359                                                                                                                                                                                                                                                                                                                                                                                                                                      | 1472       | 14       | 8785      | 3.410326087     | 0.999997466 | 0.087335386 | 7.299353413 |
| GOTERM_BP_FAT | GO:0009167-purine ribonucleoside monophosphate metabolic process         | 8     | 0.373308446 | 0.0041898 | Q05927, Q0VCK0, P56658, Q59A32, Q2HJ26, A0JNA3, Q3SWY3, Q0VC13                                                                                                                                                                                                                                                                                                                                                                                                                                              | 1472       | 14       | 8785      | 3.410326087     | 0.999997466 | 0.087335386 | 7.299353413 |
| GOTERM_BP_FAT | GO:0034622-cellular macromolecular complex assembly                      | 47    | 2.193187121 | 0.0049267 | Q2TA40, Q02399, Q0I87, A0JNQ6, Q17QGR, Q2T950, Q08E52, A1A48, Q2HJ2, Q9TU47, Q3T122, Q17Q89, P52193, A6H784, A6H767, A5D9D4, A1LSA6, P84227, A6QNT3, Q32KM1, Q32S29, Q5E9H5, Q0P5F2, Q32L01, Q5E9F8, Q3HNG7, A6QPI6, Q17Q0, Q9TRY0, Q3MHM5, A7YW D2, Q2KJ0, Q3ZC7, Q7LW2, Q8E21, P81947, Q02375, Q0VCK6, Q08DE0, P42028, Q2HJ86, P48427, A1A4A8, A4FUH5, Q14816, Q2NL24, Q64719                                                                                                                             | 1472       | 190      | 8785      | 1.476312214     | 0.999999739 | 0.101242245 | 8.529872205 |
| GOTERM_BP_FAT | GO:0006396-RNA processing                                                | 62    | 2.893140457 | 0.0050636 | Q17QI2, Q3ZBV3, Q3T087, Q5E9Z8, Q3SZR8, A5D7H5, Q1JQB6, Q3CE9, Q0P5D0, Q0P5D2, Q2HJ60, P61286, Q56K10, Q32PE9, Q29RH4, Q3ZCA2, Q3T147, Q3T090, Q2TBQ0, Q5E9I1, Q2HJ92, P67808, A0JNS2, Q3T106, Q3B8S0, P79101, Q2KIR1, Q3MHE2, Q2KJ71, Q5E9E6, Q2HJ88, Q10568, Q2NL22, Q1RMR2, A8E4M9, Q5E959, Q3MHX3, Q05B50, Q24Z8, Q2KJ0, Q5E992, Q02691, A6H7F4, Q3ZBK6, Q56JX6, P09867, A5D7N5, A6QPO5, Q1RML6, P10881, Q2KIS2, Q2KJA6, A1A4K8, Q58DW5, Q3T0D0, Q3SWZ6, Q3SYR3, Q3MHR5, A6QLT9, A7MBD2, Q3B7L6, Q0VCY7 | 1472       | 266      | 8785      | 1.391054062     | 0.999999829 | 0.103223804 | 8.756844209 |
| GOTERM_BP_FAT | GO:0043069-negative regulation of programmed cell death                  | 38    | 1.773215119 | 0.006384  | Q9XT96, Q0VC12, Q0V882, P00442, P35705, P23727, Q5E9C2, P48734, Q1LZA3, Q3TOGR, Q29455, Q3MHF7, A5D789, Q0P5F4, Q95M18, P80177, Q0Z7W6, Q5E984, P45478, P00435, P00432, Q27965, Q17QR2, Q3MHM6, Q9TUM3, P43481, Q0P594, Q32S38, Q9BGE3, Q9BGI1, Q0VC37, A6QLT9, P56658, Q5EAC7, P61585, Q02703, Q0VCY8, Q08DY9, Q3MQ24                                                                                                                                                                                      | 1472       | 148      | 8785      | 1.532342465     | 0.999999997 | 0.127589963 | 10.91827852 |
| GOTERM_BP_FAT | GO:0060548-negative regulation of cell death                             | 38    | 1.773215119 | 0.006384  | Q9XT96, Q0VC12, Q0V882, P00442, P35705, P23727, Q5E9C2, P48734, Q1LZA3, Q3TOGR, Q29455, Q3MHF7, A5D789, Q0P5F4, Q95M18, P80177, Q0Z7W6, Q5E984, P45478, P00435, P00432, Q27965, Q17QR2, Q3MHM6, Q9TUM3, P43481, Q0P594, Q32S38, Q9BGE3, Q9BGI1, Q0VC37, A6QLT9, P56658, Q5EAC7, P61585, Q02703, Q0VCY8, Q08DY9, Q3MQ24                                                                                                                                                                                      | 1472       | 148      | 8785      | 1.532342465     | 0.999999997 | 0.127589963 | 10.91827852 |
| GOTERM_BP_FAT | GO:0009066-aspartate family amino acid metabolic process                 | 8     | 0.373308446 | 0.0067324 | Q2NL31, Q5I598, Q4JH3, Q0V D27, P31228, P33097, Q1LZA3, P12344                                                                                                                                                                                                                                                                                                                                                                                                                                              | 1472       | 15       | 8785      | 3.182971014     | 0.999999999 | 0.133225852 | 11.48046466 |
| GOTERM_BP_FAT | GO:0002226-microtubule cytoskeleton organization                         | 19    | 0.886607559 | 0.0076122 | A2VDN5, Q2YD10, Q32KS0, Q3ZBK3, Q2KJ0, A0JNH5, Q0I23, P38584, A0JNH7, P81947, Q2HJG1, A6QNZ5, A7YY75, Q08DR9, Q3T0M7, A5D7P5, Q0VCK4, Q2BTN3, Q32P97                                                                                                                                                                                                                                                                                                                                                        | 1472       | 60       | 8785      | 1.88988904      | 1           | 0.148387931 | 12.88517976 |
| GOTERM_BP_FAT | GO:0008283-cell proliferation                                            | 30    | 1.399906673 | 0.0078249 | Q08DD6, Q58DV0, A6QNZ5, Q0I59, A0JNA3, Q2A22, P62871, P23356, Q3SWY3, P61223, P25930, P80177, P00435, Q77774, Q3ZBH9, Q5E947, Q279P4, Q0VCK6, Q6EWQ7, P62285, Q3SWZ6, Q9BGE3, Q2HJF6, Q02703, Q3ZCFO, Q27991, Q3S207, P20072, P18203                                                                                                                                                                                                                                                                        | 1472       | 111      | 8785      | 1.612992068     | 1           | 0.151263514 | 13.22161523 |
| GOTERM_BP_FAT | GO:0046128-purine ribonucleoside metabolic process                       | 7     | 0.3266489   | 0.0080688 | Q56W4, Q3ZBS0, Q05927, P56658, A7E3T7, A6H7F4, Q3S218                                                                                                                                                                                                                                                                                                                                                                                                                                                       | 1472       | 12       | 8785      | 3.481374547     | 1           | 0.154643294 | 13.60591134 |
| GOTERM_BP_FAT | GO:0006458-'de novo' protein folding                                     | 7     | 0.3266489   | 0.0080688 | Q3M100, A1A4M8, P19120, A5PK75, A5PJN2, Q0IIM3, Q32LM0                                                                                                                                                                                                                                                                                                                                                                                                                                                      | 1472       | 12       | 8785      | 3.481374547     | 1           | 0.154643294 | 13.60591134 |
| GOTERM_BP_FAT | GO:0009168-purine ribonucleoside monophosphate biosynthetic process      | 7     | 0.3266489   | 0.0080688 | Q0VCK0, P56658, Q59A32, Q2HJ26, A0JNA3, Q3SWY3, Q0VC13                                                                                                                                                                                                                                                                                                                                                                                                                                                      | 1472       | 12       | 8785      | 3.481374547     | 1           | 0.154643294 | 13.60591134 |
| GOTERM_BP_FAT | GO:0042278-purine nucleoside metabolic process                           | 7     | 0.3266489   | 0.0080688 | Q56W4, Q3ZBS0, Q05927, P56658, A7E3T7, A6H7F4, Q3S218                                                                                                                                                                                                                                                                                                                                                                                                                                                       | 1472       | 12       | 8785      | 3.481374547     | 1           | 0.154643294 | 13.60591134 |
| GOTERM_BP_FAT | GO:0051084-'de novo' posttranslational protein folding                   | 7     | 0.3266489   | 0.0080688 | Q3M100, A1A4M8, P19120, A5PK75, A5PJN2, Q0IIM3, Q32LM0                                                                                                                                                                                                                                                                                                                                                                                                                                                      | 1472       | 12       | 8785      | 3.481374547     | 1           | 0.154643294 | 13.60591134 |
| GOTERM_BP_FAT | GO:0009127-purine nucleoside monophosphate biosynthetic process          | 7     | 0.3266489   | 0.0080688 | Q0VCK0, P56658, Q59A32, Q2HJ26, A0JNA3, Q3SWY3, Q0VC13                                                                                                                                                                                                                                                                                                                                                                                                                                                      | 1472       | 12       | 8785      | 3.481374547     | 1           | 0.154643294 | 13.60591134 |
| GOTERM_BP_FAT | GO:0006027-regulation of vesicle-mediated transport                      | 14    | 0.653289781 | 0.0085914 | Q02399, P45478, Q17QF8, Q2TBH7, Q1RMR9, P10948, Q3TOGR, Q58DS9, Q95114, P52193, Q08E63, A5D7D1, P19035, P11023                                                                                                                                                                                                                                                                                                                                                                                              | 1472       | 39       | 8785      | 2.142384337     | 1           | 0.162826207 | 14.42390834 |
| GOTERM_BP_FAT | GO:0006308-DNA catabolic process                                         | 10    | 0.466603558 | 0.008785  | P45478, Q3SZ43, Q0VC37, P00442, P56541, P38447, Q0P5K3, Q02703, Q08DY9, Q58CZ0                                                                                                                                                                                                                                                                                                                                                                                                                              | 1472       | 23       | 8785      | 2.594813327     | 1           | 0.165176621 | 14.72511293 |
| GOTERM_BP_FAT | GO:0006120-mitochondrial electron transport, NADH to ubiquinone          | 5     | 0.233317779 | 0.0088289 | Q02372, Q05752, Q02827, Q6QTH0, P52505                                                                                                                                                                                                                                                                                                                                                                                                                                                                      | 1472       | 6        | 8785      | 4.97339221      | 1           | 0.164930449 | 14.79332074 |
| GOTERM_BP_FAT | GO:0009083-branched chain family amino acid catabolic process            | 5     | 0.233317779 | 0.0088289 | Q5E4A0, Q0NXR6, P21839, Q2HJ73, A4HFQ7                                                                                                                                                                                                                                                                                                                                                                                                                                                                      | 1472       | 6        | 8785      | 4.97339221      | 1           | 0.164930449 | 14.79332074 |
| GOTERM_BP_FAT | GO:0065002-intracellular protein transmembrane transport                 | 5     | 0.233317779 | 0.0088289 | Q3SZC1, Q1RMV0, Q3ZL81, Q0P5N5, Q0G846                                                                                                                                                                                                                                                                                                                                                                                                                                                                      | 1472       | 6        | 8785      | 4.97339221      | 1           | 0.164930449 | 14.79332074 |
| GOTERM_BP_FAT | GO:0043066-negative regulation of apoptosis                              | 37    | 1.726551563 | 0.0088815 | Q9XT96, Q0VC12, Q0V882, P00442, P35705, P23727, Q5E9C2, P48734, Q1LZA3, Q3TOGR, Q29455, Q3MHF7, A5D789, Q0P5F4, Q95M18, P80177, Q0Z7W6, Q5E984, P45478, P00435, P00432, Q27965, Q17QR2, Q3MHM6, Q9TUM3, P43481, Q0P594, Q32S38, Q9BGE3, Q9BGI1, Q0VC37, A6QLT9, P56658, Q5EAC7, P61585, Q02703, Q0VCY8, Q08DY9, Q3MQ24                                                                                                                                                                                      | 1472       | 146      | 8785      | 1.512546261     | 1           | 0.164834926 | 14.87400395 |
| GOTERM_BP_FAT | GO:0015931-nucleobase, nucleoside, nucleotide and nucleic acid transport | 13    | 0.606626225 | 0.0089149 | A5D7H5, Q29RH4, P09867, A7YY75, Q3ZBB0, Q3ZBV3, Q3ZB26, A5PJZ5, Q3ZC83, P18246, Q2NL22, Q2TBP1, Q6EWQ7                                                                                                                                                                                                                                                                                                                                                                                                      | 1472       | 35       | 8785      | 2.216711957     | 1           | 0.164416442 | 14.92670255 |
| GOTERM_BP_FAT | GO:0006800-oxygen and reactive oxygen species metabolic process          | 13    | 0.606626225 | 0.0089149 | P00435, Q77774, P35705, P00442, P00432, Q5E946, Q5E947, Q6QTH0, P37359, Q9BGE3, Q02375, Q3MHF7, P15690, P41976                                                                                                                                                                                                                                                                                                                                                                                              | 1472       | 35       | 8785      | 2.216711957     | 1           | 0.164416442 | 14.92670255 |
| GOTERM_BP_FAT | GO:0006744-ubiquinone biosynthetic process                               | 6     | 0.279981335 | 0.0090978 | Q3T131, Q58CW1, Q2KIL4, Q0P5A2, A6QR05, Q2NL34                                                                                                                                                                                                                                                                                                                                                                                                                                                              | 1472       | 9        | 8785      | 3.978713768     | 1           | 0.166511356 | 15.20956945 |
| GOTERM_BP_FAT | GO:0033108-mitochondrial respiratory chain complex assembly              | 6     | 0.279981335 | 0.0090978 | Q2HJ2, Q02375, Q0I87, P42028, A4FUH5, Q5E9H5                                                                                                                                                                                                                                                                                                                                                                                                                                                                | 1472       | 9        | 8785      | 3.978713768     | 1           | 0.166511356 | 15.20956945 |
| GOTERM_BP_FAT | GO:0006743-ubiquinone metabolic process                                  | 6     | 0.279981335 | 0.0090978 | Q3T131, Q58CW1, Q2KIL4, Q0P5A2, A6QR05, Q2NL34                                                                                                                                                                                                                                                                                                                                                                                                                                                              | 1472       | 9        | 8785      | 3.978713768     | 1           | 0.166511356 | 15.20956945 |
| GOTERM_BP_FAT | GO:0045426-quinone cofactor biosynthetic process                         | 6     | 0.279981335 | 0.0090978 | Q3T131, Q58CW1, Q2KIL4, Q0P5A2, A6QR05, Q2NL34                                                                                                                                                                                                                                                                                                                                                                                                                                                              | 1472       | 9        | 8785      | 3.978713768     | 1           | 0.166511356 | 15.20956945 |
| GOTERM_BP_FAT | GO:0010970-microtubule-based transport                                   | 6     | 0.279981335 | 0.0090978 | Q2HJF8, Q08DH4, A7E2Z6, Q5E9M9, A6H7H2, P23356                                                                                                                                                                                                                                                                                                                                                                                                                                                              | 1472       | 9        | 8785      | 3.978713768     | 1           | 0.166511356 | 15.20956945 |
| GOTERM_BP_FAT | GO:0009206-purine ribonucleoside triphosphate biosynthetic process       | 25    | 1.166588994 | 0.0098516 | A5PK70, Q00361, P11019, Q97681, P31408, Q3TOC6, P31404, P32876, P13620, P13621, P57709, P40682, Q08DA1, P05631, P22027, P05630, P52174, P52175, Q3TOQ4, P21282, Q0VCY0, P13619, Q28851, Q2KJB6, P00829, P61420, Q28852                                                                                                                                                                                                                                                                                      | 1472       | 89       | 8785      | 1.67642434      | 1           | 0.178011    | 16.36646606 |

| Category      | Term                                                           | Count | %           | PValue    | Genes                                                                                                                                                                                                                                                                                                                                                                                                                                                                                                                                                                                                                                                                                                                                                                                                                                                                                                                                                                                                                        | List Total | Pop Hits | Pop Total | Fold Enrichment | Bonferroni | Benjamini   | FDR         |
|---------------|----------------------------------------------------------------|-------|-------------|-----------|------------------------------------------------------------------------------------------------------------------------------------------------------------------------------------------------------------------------------------------------------------------------------------------------------------------------------------------------------------------------------------------------------------------------------------------------------------------------------------------------------------------------------------------------------------------------------------------------------------------------------------------------------------------------------------------------------------------------------------------------------------------------------------------------------------------------------------------------------------------------------------------------------------------------------------------------------------------------------------------------------------------------------|------------|----------|-----------|-----------------|------------|-------------|-------------|
| GOTERM_BP_FAT | GO:0009145-purine nucleoside triphosphate biosynthetic process | 25    | 1.166588894 | 0.0098516 | A5PK70, Q00361, P11019, O97681, P31408, Q3TC06, P31404, P32876, P13620, P13621, P57709, P40682, Q08DA1, P05631, P22027, P05630, P52174, P52175, Q3TOQ4, P21282, Q0VCY0, P13619, Q28851, Q2KJB6, P00829, P61420, Q28852                                                                                                                                                                                                                                                                                                                                                                                                                                                                                                                                                                                                                                                                                                                                                                                                       | 1472       | 89       | 8785      | 1.67642434      | 1          | 0.178011    | 16.36646606 |
| GOTERM_BP_FAT | GO:0009201-ribonucleoside triphosphate biosynthetic process    | 25    | 1.166588894 | 0.0098516 | A5PK70, Q00361, P11019, O97681, P31408, Q3TC06, P31404, P32876, P13620, P13621, P57709, P40682, Q08DA1, P05631, P22027, P05630, P52174, P52175, Q3TOQ4, P21282, Q0VCY0, P13619, Q28851, Q2KJB6, P00829, P61420, Q28852                                                                                                                                                                                                                                                                                                                                                                                                                                                                                                                                                                                                                                                                                                                                                                                                       | 1472       | 89       | 8785      | 1.67642434      | 1          | 0.178011    | 16.36646606 |
| GOTERM_BP_FAT | GO:0006694-steroid biosynthetic process                        | 14    | 0.653289781 | 0.0108219 | P07514, Q8WVY2, Q8WVY1, Q1LZ95, A4FUD2, P84466, Q5E9T8, Q58DH7, A6QR14, Q1QD0, Q3ZBE9, Q3ZCD7, Q5E9J5, Q5E9H7                                                                                                                                                                                                                                                                                                                                                                                                                                                                                                                                                                                                                                                                                                                                                                                                                                                                                                                | 1472       | 40       | 8785      | 2.088824728     | 1          | 0.192699667 | 17.83366031 |
| GOTERM_BP_FAT | GO:0009063-cellular amino acid catabolic process               | 14    | 0.653289781 | 0.0108219 | Q5EA40, P25285, P00366, Q3MHLA, A4IFQ7, O46504, P20821, P33097, P12344, Q0NXR6, P21839, A4FUD0, Q2T9V8, Q2HJ73                                                                                                                                                                                                                                                                                                                                                                                                                                                                                                                                                                                                                                                                                                                                                                                                                                                                                                               | 1472       | 40       | 8785      | 2.088824728     | 1          | 0.192699667 | 17.83366031 |
| GOTERM_BP_FAT | GO:0009142-nucleoside triphosphate biosynthetic process        | 25    | 1.166588894 | 0.0113599 | A5PK70, Q00361, P11019, O97681, P31408, Q3TC06, P31404, P32876, P13620, P13621, P57709, P40682, Q08DA1, P05631, P22027, P05630, P52174, P52175, Q3TOQ4, P21282, Q0VCY0, P13619, Q28851, Q2KJB6, P00829, P61420, Q28852                                                                                                                                                                                                                                                                                                                                                                                                                                                                                                                                                                                                                                                                                                                                                                                                       | 1472       | 90       | 8785      | 1.657797403     | 1          | 0.200150206 | 18.63671741 |
| GOTERM_BP_FAT | GO:0046148-pigment biosynthetic process                        | 9     | 0.419972002 | 0.0114812 | Q56W4, Q2HJ58, P56658, Q59A32, A5PK65, Q1LZ95, Q2KIN5, P22600, Q58DK5                                                                                                                                                                                                                                                                                                                                                                                                                                                                                                                                                                                                                                                                                                                                                                                                                                                                                                                                                        | 1472       | 20       | 8785      | 2.685631793     | 1          | 0.200925442 | 18.81672842 |
| GOTERM_BP_FAT | GO:0044087-regulation of cellular component biogenesis         | 16    | 0.746616892 | 0.0116779 | Q3ZLP2, Q5E997, A4FUAR, Q3ZCK2, Q5E963, Q3T035, Q1LZB2, P10103, Q3MHR7, P61585, Q3ZBD9, Q38CQ2, Q3SYX9, Q1JY79, P61157, P62998                                                                                                                                                                                                                                                                                                                                                                                                                                                                                                                                                                                                                                                                                                                                                                                                                                                                                               | 1472       | 49       | 8785      | 1.948757764     | 1          | 0.202865474 | 19.10788112 |
| GOTERM_BP_FAT | GO:0051259-protein oligomerization                             | 18    | 0.839944004 | 0.01194   | A2VDN5, Q3ZC55, P80177, A1L567, Q5EA65, Q1RMV0, P00432, Q58D72, P79132, Q0II65, A0IN14, Q59HJ6, A6QR05, P18246, Q3SZ18, O02703, Q3ZBD3, P01096                                                                                                                                                                                                                                                                                                                                                                                                                                                                                                                                                                                                                                                                                                                                                                                                                                                                               | 1472       | 58       | 8785      | 1.852159858     | 1          | 0.205785871 | 19.49426676 |
| GOTERM_BP_FAT | GO:0009119-ribonucleoside metabolic process                    | 10    | 0.466635558 | 0.0120081 | Q56W4, A5PK70, Q3ZBS0, Q05927, P56658, A7E3T7, P52174, A6H7F4, P31754, P52175, Q3SZ18, Q3TOQ4                                                                                                                                                                                                                                                                                                                                                                                                                                                                                                                                                                                                                                                                                                                                                                                                                                                                                                                                | 1472       | 24       | 8785      | 2.486696105     | 1          | 0.205693395 | 19.59443391 |
| GOTERM_BP_FAT | GO:0006754-ATP biosynthetic process                            | 23    | 1.073261783 | 0.0120353 | P40682, Q08DA1, P22027, P05631, P05630, Q00361, P11019, O97681, P21282, P31408, Q3TC06, Q0VCY0, P13619, P22876, P31404, Q2KJB6, Q28851, P00829, Q28852, P61420, P13620, P57709, P13621                                                                                                                                                                                                                                                                                                                                                                                                                                                                                                                                                                                                                                                                                                                                                                                                                                       | 1472       | 81       | 8785      | 1.694637346     | 1          | 0.204973365 | 19.63391672 |
| GOTERM_BP_FAT | GO:0006508-proteolysis                                         | 125   | 5.83294447  | 0.0120406 | Q0VCL3, Q71SS4, P67810, Q3MHZ7, Q5SZN3, A7MBJ5, A0JNK3, Q2KJG2, Q2T8X8, A3KMA5, Q41515, A3KMA3, P81425, Q1JY98, Q3T0X5, Q3ZC39, A7EJZ6, Q2TA14, Q0P5M8, Q3ZC84, Q2KJF7, Q3T108, Q0P594, Q0P593, A6QR14, Q2KJG2, Q2T8X8, A6QR12, Q1JY92, Q3SZ52, Q08D99, Q58DU5, Q5E9K0, Q3MHX6, Q0IMM6, A3KN22, Q3T0V5, Q2KJG6, Q3ZBT1, Q2T9S7, Q3T0P5, A7MBD9, P62194, Q3T112, Q58DG6, Q0VCX1, Q3SZ43, Q3ZBG0, Q0V8G3, Q3ZPF3, Q29R14, Q5E9I6, P61955, Q1RUM2, A6H744, Q3T0I2, Q2KJG6, Q10741, Q5M18, Q5E987, A4FNF7, P31800, A4FV12, Q5M12, P05689, Q3T0Z3, P61085, Q2KJK0, Q3ZCF7, Q3ZPG3, Q3ZCF3, Q27970, Q08DE9, Q1LZE1, Q9XT96, Q1RMY2, Q3T134, A6QLA4, A6QR55, Q3SX24, Q3SX23, A1L506, Q0VCP5, P07688, A2VDQ5, Q29RK4, P00730, Q0VD31, Q2HJ64, P23004, P23356, Q3ZC22, P33672, Q3SZU5, Q2TBU0, P00745, Q2KJH4, Q29463, Q3MHN0, A6QNM7, Q3ZKL2, A1A4K3, Q3ZPA5, Q5E953, Q0P568, Q3ZC89, Q5E9F9, Q3T168, Q0P5K3, Q1RMW1, A2VEI4, P80227, A2VDP1, Q2HJH1, Q3ZC88, Q3ZLN1, Q2NKZ9, Q3SZ71, A2VE20, Q0VCU3, Q59HJ6, Q0V8B6, A2VEA3, Q3T0V2 | 1472       | 615      | 8785      | 1.21302249      | 1          | 0.203958567 | 19.64212218 |
| GOTERM_BP_FAT | GO:0006733-oxidoreductin coenzyme metabolic process            | 11    | 0.513299113 | 0.0120682 | Q3T131, A4FUF0, Q58CW1, Q3T186, Q2KILA, Q5E956, Q0PSA2, A6QR05, Q2NL34, Q2HJ77, Q3ZC14                                                                                                                                                                                                                                                                                                                                                                                                                                                                                                                                                                                                                                                                                                                                                                                                                                                                                                                                       | 1472       | 28       | 8785      | 2.344599185     | 1          | 0.203246844 | 19.68259017 |
| GOTERM_BP_FAT | GO:0030705-cytoskeleton-dependent intracellular transport      | 7     | 0.32664489  | 0.0128885 | Q2HJF8, Q08DH4, A7EJZ6, Q5E9M9, A6H7H2, A2VDK6, P23356                                                                                                                                                                                                                                                                                                                                                                                                                                                                                                                                                                                                                                                                                                                                                                                                                                                                                                                                                                       | 1472       | 13       | 8785      | 3.213576505     | 1          | 0.214381244 | 20.87799569 |
| GOTERM_BP_FAT | GO:0009067-aspartate family amino acid biosynthetic process    | 6     | 0.279981335 | 0.0157118 | Q2NL31, Q4JUI3, Q0VD27, P33097, Q1LZA3, P12344                                                                                                                                                                                                                                                                                                                                                                                                                                                                                                                                                                                                                                                                                                                                                                                                                                                                                                                                                                               | 1472       | 10       | 8785      | 3.580842391     | 1          | 0.253817688 | 24.86521921 |
| GOTERM_BP_FAT | GO:0006536-glutamate metabolic process                         | 6     | 0.279981335 | 0.0157118 | Q3ZS38, Q2T9Y6, P00366, P33097, P12344, Q3SZ10                                                                                                                                                                                                                                                                                                                                                                                                                                                                                                                                                                                                                                                                                                                                                                                                                                                                                                                                                                               | 1472       | 10       | 8785      | 3.580842391     | 1          | 0.253817688 | 24.86521921 |
| GOTERM_BP_FAT | GO:0042440-pigment metabolic process                           | 10    | 0.466635558 | 0.016036  | A5D7K0, Q56W4, Q2HJ58, P56658, Q59A32, A5PK65, Q1LZ95, Q2KIN5, P22600, Q58DK5                                                                                                                                                                                                                                                                                                                                                                                                                                                                                                                                                                                                                                                                                                                                                                                                                                                                                                                                                | 1472       | 25       | 8785      | 2.387228261     | 1          | 0.25702041  | 25.31076017 |
| GOTERM_BP_FAT | GO:0030100-regulation of endocytosis                           | 10    | 0.466635558 | 0.016036  | Q3T0G8, P45478, Q58DS9, P52193, Q95114, Q1RMR9, Q2T8H7, Q08E63, A5D7D1, P19035                                                                                                                                                                                                                                                                                                                                                                                                                                                                                                                                                                                                                                                                                                                                                                                                                                                                                                                                               | 1472       | 25       | 8785      | 2.387228261     | 1          | 0.25702041  | 25.31076017 |
| GOTERM_BP_FAT | GO:0030150-protein import into mitochondrial matrix            | 4     | 0.186654223 | 0.0163968 | Q3SZC1, Q3ZL81, Q0P5N5, Q0G846                                                                                                                                                                                                                                                                                                                                                                                                                                                                                                                                                                                                                                                                                                                                                                                                                                                                                                                                                                                               | 1472       | 4        | 8785      | 5.968070652     | 1          | 0.260674738 | 25.80356631 |
| GOTERM_BP_FAT | GO:0008631-induction of apoptosis by oxidative stress          | 4     | 0.186654223 | 0.0163968 | P00435, Q2NL36, Q08DY9, Q0P5F4                                                                                                                                                                                                                                                                                                                                                                                                                                                                                                                                                                                                                                                                                                                                                                                                                                                                                                                                                                                               | 1472       | 4        | 8785      | 5.968070652     | 1          | 0.260674738 | 25.80356631 |
| GOTERM_BP_FAT | GO:0046129-purine ribonucleoside biosynthetic process          | 5     | 0.233317779 | 0.0178829 | Q56W4, Q05927, P56658, A6H7F4, Q3SZ18                                                                                                                                                                                                                                                                                                                                                                                                                                                                                                                                                                                                                                                                                                                                                                                                                                                                                                                                                                                        | 1472       | 7        | 8785      | 4.262907609     | 1          | 0.279412535 | 27.80142694 |
| GOTERM_BP_FAT | GO:0010257-NADH dehydrogenase complex assembly                 | 5     | 0.233317779 | 0.0178829 | Q2HJ12, Q02375, P42028, A4FUH5, Q5E9H5                                                                                                                                                                                                                                                                                                                                                                                                                                                                                                                                                                                                                                                                                                                                                                                                                                                                                                                                                                                       | 1472       | 7        | 8785      | 4.262907609     | 1          | 0.279412535 | 27.80142694 |
| GOTERM_BP_FAT | GO:0042455-ribonucleoside biosynthetic process                 | 5     | 0.233317779 | 0.0178829 | Q56W4, Q05927, P56658, A6H7F4, Q3SZ18                                                                                                                                                                                                                                                                                                                                                                                                                                                                                                                                                                                                                                                                                                                                                                                                                                                                                                                                                                                        | 1472       | 7        | 8785      | 4.262907609     | 1          | 0.279412535 | 27.80142694 |
| GOTERM_BP_FAT | GO:0009163-nucleoside biosynthetic process                     | 5     | 0.233317779 | 0.0178829 | Q56W4, Q05927, P56658, A6H7F4, Q3SZ18                                                                                                                                                                                                                                                                                                                                                                                                                                                                                                                                                                                                                                                                                                                                                                                                                                                                                                                                                                                        | 1472       | 7        | 8785      | 4.262907609     | 1          | 0.279412535 | 27.80142694 |
| GOTERM_BP_FAT | GO:0032981-mitochondrial respiratory chain complex I assembly  | 5     | 0.233317779 | 0.0178829 | Q2HJ12, Q02375, P42028, A4FUH5, Q5E9H5                                                                                                                                                                                                                                                                                                                                                                                                                                                                                                                                                                                                                                                                                                                                                                                                                                                                                                                                                                                       | 1472       | 7        | 8785      | 4.262907609     | 1          | 0.279412535 | 27.80142694 |
| GOTERM_BP_FAT | GO:0042451-purine nucleoside biosynthetic process              | 5     | 0.233317779 | 0.0178829 | Q56W4, Q05927, P56658, A6H7F4, Q3SZ18                                                                                                                                                                                                                                                                                                                                                                                                                                                                                                                                                                                                                                                                                                                                                                                                                                                                                                                                                                                        | 1472       | 7        | 8785      | 4.262907609     | 1          | 0.279412535 | 27.80142694 |
| GOTERM_BP_FAT | GO:0043067-regulation of programmed cell death                 | 65    | 3.033131125 | 0.018071  | Q9XT96, Q95KV7, Q02399, Q5E9L4, P23727, Q5E9C2, Q2KJ72, P48734, A0JNK3, A4FV00, Q3T0G8, A6QLB1, P80177, Q0Z7W6, P45478, Q2HJ92, Q3MHM6, Q0VC36, Q645M6, Q9TUM3, P43481, Q6EWQ7, Q0P594, Q9BQ3, Q9BQ1, Q0VC37, P61585, Q08DY9, Q3MQ24, Q2T9S4, Q3SX02, Q0VCJ2, Q0V882, P35705, P00442, Q3SZ15, Q0P5N4, Q3ZBT1, Q3ZLM0, Q1LZA3, Q3MHF7, Q29455, P38447, Q2NL36, A5D7R9, Q3ZCC3, P07994, Q0P5F4, Q95M18, Q5E984, P00435, P00432, Q3T169, Q27965, Q17QR2, Q5E947, A5D7E8, Q3ZS38, Q08DE1, A6QLT9, P56658, Q5EAC7, Q08DE5, O02703, Q0VCY8, Q2NL24                                                                                                                                                                                                                                                                                                                                                                                                                                                                                 | 1472       | 298      | 8785      | 1.301760377     | 1          | 0.280514306 | 28.05063128 |
| GOTERM_BP_FAT | GO:0009310-amine catabolic process                             | 15    | 0.699953336 | 0.0186087 | Q5EA40, P25285, P00366, Q3MHLA, A4IFQ7, O46504, P20821, P33097, P12344, Q0NXR6, P21839, A4FUD0, Q2T9V8, Q2HJ73, Q865R1                                                                                                                                                                                                                                                                                                                                                                                                                                                                                                                                                                                                                                                                                                                                                                                                                                                                                                       | 1472       | 47       | 8785      | 1.9047034       | 1          | 0.286179854 | 28.75886635 |
| GOTERM_BP_FAT | GO:0010941-regulation of cell death                            | 65    | 3.033131125 | 0.0193521 | Q9XT96, Q95KV7, Q02399, Q5E9L4, P23727, Q5E9C2, Q2KJ72, P48734, A0JNK3, A4FV00, Q3T0G8, A6QLB1, P80177, Q0Z7W6, P45478, Q2HJ92, Q3MHM6, Q0VC36, Q645M6, Q9TUM3, P43481, Q6EWQ7, Q0P594, Q9BQ3, Q9BQ1, Q0VC37, P61585, Q08DY9, Q3MQ24, Q2T9S4, Q3SX02, Q0VCJ2, Q0V882, P35705, P00442, Q3SZ15, Q0P5N4, Q3ZBT1, Q3ZLM0, Q1LZA3, Q3MHF7, Q29455, P38447, Q2NL36, A5D7R9, Q3ZCC3, P07994, Q0P5F4, Q95M18, Q5E984, P00435, P00432, Q3T169, Q27965, Q17QR2, Q5E947, A5D7E8, Q3ZS38, Q08DE1, A6QLT9, P56658, Q5EAC7, Q08DE5, O02703, Q0VCY8, Q2NL24                                                                                                                                                                                                                                                                                                                                                                                                                                                                                 | 1472       | 299      | 8785      | 1.297406664     | 1          | 0.29438485  | 29.72651152 |
| GOTERM_BP_FAT | GO:0009112-nucleobase metabolic process                        | 7     | 0.32664489  | 0.0194125 | Q56W4, Q07536, Q2HJ58, P56658, Q59A32, P31754, Q3SZ18                                                                                                                                                                                                                                                                                                                                                                                                                                                                                                                                                                                                                                                                                                                                                                                                                                                                                                                                                                        | 1472       | 14       | 8785      | 2.984035326     | 1          | 0.293732429 | 29.804511   |
| GOTERM_BP_FAT | GO:0042743-hydrogen peroxide metabolic process                 | 7     | 0.32664489  | 0.0194125 | Q9BQ3, Q3MHF7, P00435, P00442, P35705, P00432, Q5E946, Q5E947                                                                                                                                                                                                                                                                                                                                                                                                                                                                                                                                                                                                                                                                                                                                                                                                                                                                                                                                                                | 1472       | 14       | 8785      | 2.984035326     | 1          | 0.293732429 | 29.804511   |

| Category      | Term                                                                          | Count | %           | PValue    | Genes                                                                                                                                                                                                                                                                                                                                                                                                                                                                                                                                | List Total | Pop Hits | Pop Total | Fold Enrichment | Bonferroni | Benjamini   | FDR         |
|---------------|-------------------------------------------------------------------------------|-------|-------------|-----------|--------------------------------------------------------------------------------------------------------------------------------------------------------------------------------------------------------------------------------------------------------------------------------------------------------------------------------------------------------------------------------------------------------------------------------------------------------------------------------------------------------------------------------------|------------|----------|-----------|-----------------|------------|-------------|-------------|
| GOTERM_BP_FAT | GO:0043648-dicarboxylic acid metabolic process                                | 7     | 0.3266489   | 0.0194125 | Q3T145, Q3ZL63, Q148D3, Q08DM3, Q9TUM3, P33097, P12344                                                                                                                                                                                                                                                                                                                                                                                                                                                                               | 1472       | 14       | 8785      | 2.984035326     | 1          | 0.293732429 | 29.804511   |
| GOTERM_BP_FAT | GO:000184-nuclear-transcribed mRNA catabolic process, nonsense-mediated decay | 7     | 0.3266489   | 0.0194125 | ASD7H5, A6QPH1, Q8MJU7, Q2YDD2, Q3ZBV3, Q3T102, Q2NL22                                                                                                                                                                                                                                                                                                                                                                                                                                                                               | 1472       | 14       | 8785      | 2.984035326     | 1          | 0.293732429 | 29.804511   |
| GOTERM_BP_FAT | GO:0008654-phospholipid biosynthetic process                                  | 14    | 0.653289781 | 0.0202538 | A0JNC1, P10790, Q2KHY9, Q3MHZ7, P20456, Q95H2, Q2NL29, Q3T103, Q3SZL5, Q2KJ28, Q3ZLMO, Q0VCY6, Q3SZL3, Q1LZ44                                                                                                                                                                                                                                                                                                                                                                                                                        | 1472       | 43       | 8785      | 1.94309277      | 1          | 0.302952499 | 30.88380135 |
| GOTERM_BP_FAT | GO:0007006-mitochondrial membrane organization                                | 8     | 0.373308446 | 0.0210259 | Q3TOGR, A6QPH6, Q0VCA3, Q1RMV0, Q02703, Q76LV2, Q3SZB3, Q3ZLMO                                                                                                                                                                                                                                                                                                                                                                                                                                                                       | 1472       | 18       | 8785      | 2.652475845     | 1          | 0.311104336 | 31.86090961 |
| GOTERM_BP_FAT | GO:0051262-protein tetramerization                                            | 8     | 0.373308446 | 0.0210259 | Q3ZC55, A0JN14, Q1RMV0, P00432, A6QR05, Q3SZ18, Q3ZBD3, P01096                                                                                                                                                                                                                                                                                                                                                                                                                                                                       | 1472       | 18       | 8785      | 2.652475845     | 1          | 0.311104336 | 31.86090961 |
| GOTERM_BP_FAT | GO:0042981-regulation of apoptosis                                            | 64    | 2.986467569 | 0.0211443 | Q9XT96, Q95KV7, Q02399, Q5E9L4, P23727, Q5E9C2, Q2K172, P48734, A0JNK3, A4FV00, Q3TOGR, A6QLB1, P80177, Q0Z7W6, P45478, Q2HJ92, Q3MHM6, Q0VC36, Q645M6, Q9TUM3, Q6EWQ7, Q0P994, Q9BGC3, Q9BGI1, Q0VC37, P61585, Q08DY9, Q3M024, Q2T9S4, Q3SNX2, Q0VCJ2, Q0V882, P35705, P04442, Q3SZ15, Q0P5N4, Q3ZBT1, Q3ZLMO, Q1LZ44, Q3MHF7, Q29455, P38447, Q2NL36, ASD7H9, Q3ZCC3, P07994, Q0P5F4, Q6M18, Q5E984, P00435, P00432, Q3T169, Q27965, Q17QR2, Q5E947, ASD7E8, Q3ZS38, Q08DEB, A6QLT9, P56658, Q5EA7, Q08DES, Q02703, Q0VCY8, Q2NL24 | 1472       | 295      | 8785      | 1.29476787      | 1          | 0.311099185 | 32.00918671 |
| GOTERM_BP_FAT | GO:0012502-induction of programmed cell death                                 | 21    | 0.979934671 | 0.0226791 | Q95KV7, P00435, Q2HJ92, Q3T169, Q5E947, Q2K172, Q0VC36, Q0P5N4, A4FV00, A0JNK3, Q6EWQ7, Q3ZLMO, Q0VC37, Q08DEB, Q08DES, Q02703, Q2NL36, Q08DY9, P07994, A6QLB1, Q0P5F4                                                                                                                                                                                                                                                                                                                                                               | 1472       | 76       | 8785      | 1.649072154     | 1          | 0.328176756 | 33.90812587 |
| GOTERM_BP_FAT | GO:0006917-induction of apoptosis                                             | 21    | 0.979934671 | 0.0226791 | Q95KV7, P00435, Q2HJ92, Q3T169, Q5E947, Q2K172, Q0VC36, Q0P5N4, A4FV00, A0JNK3, Q6EWQ7, Q3ZLMO, Q0VC37, Q08DEB, Q08DES, Q02703, Q2NL36, Q08DY9, P07994, A6QLB1, Q0P5F4                                                                                                                                                                                                                                                                                                                                                               | 1472       | 76       | 8785      | 1.649072154     | 1          | 0.328176756 | 33.90812587 |
| GOTERM_BP_FAT | GO:0051260-protein homooligomerization                                        | 12    | 0.559962669 | 0.0236937 | A1L567, P80177, Q3ZC55, A2VDN5, A0JN14, Q59HJ6, Q3SZ18, Q58D72, Q02703, P79132, Q3ZBD3, P01096                                                                                                                                                                                                                                                                                                                                                                                                                                       | 1472       | 35       | 8785      | 2.046195652     | 1          | 0.338624756 | 35.13584424 |
| GOTERM_BP_FAT | GO:0006260-DNA replication                                                    | 23    | 1.073261783 | 0.0239092 | Q58DC8, Q2K1Z8, Q05B83, Q29R89, A6QLA6, Q3ZBH9, Q1KZG4, Q3MHL3, Q3ZP13, Q3ZHW4, Q2T9P4, Q5BIP4, Q0VC30, P28339, Q58DH8, P49004, Q2TBT1, Q0V8B7, A4IFC8, Q3ZP13, Q0VCV0, Q1RMH9, Q3SWX8, Q3T165                                                                                                                                                                                                                                                                                                                                       | 1472       | 86       | 8785      | 1.596111919     | 1          | 0.339599813 | 35.39383369 |
| GOTERM_BP_FAT | GO:0051085-chaperone mediated protein folding requiring cofactor              | 6     | 0.279981335 | 0.0248936 | Q3M100, A1A4M8, P19120, A5PK75, A5PJN2, Q0IIM3                                                                                                                                                                                                                                                                                                                                                                                                                                                                                       | 1472       | 11       | 8785      | 3.255311265     | 1          | 0.349365889 | 36.55997997 |
| GOTERM_BP_FAT | GO:0051028-mRNA transport                                                     | 10    | 0.466635558 | 0.0269091 | ASD7H5, Q29RH4, P09867, A7YY75, Q3ZBV3, Q3ZBV2, A5PJZ5, Q2NL22, Q2TBP1, Q6EWQ7                                                                                                                                                                                                                                                                                                                                                                                                                                                       | 1472       | 27       | 8785      | 2.210396538     | 1          | 0.370303484 | 38.88594226 |
| GOTERM_BP_FAT | GO:0000075-cell cycle checkpoint                                              | 10    | 0.466635558 | 0.0269091 | A6Q0W8, Q17QGR, A1A4K3, A5D7V1, A6QM04, Q0P5L6, P48734, Q2NL24, Q08E57, Q8G211                                                                                                                                                                                                                                                                                                                                                                                                                                                       | 1472       | 27       | 8785      | 2.210396538     | 1          | 0.370303484 | 38.88594226 |
| GOTERM_BP_FAT | GO:0007265-Ras protein signal transduction                                    | 10    | 0.466635558 | 0.0269091 | P19803, Q0IIM6, A5PK12, Q5E9C0, A6H7G2, P19035, A2VDK6, Q2K113, A7YY55, Q3SZA6                                                                                                                                                                                                                                                                                                                                                                                                                                                       | 1472       | 27       | 8785      | 2.210396538     | 1          | 0.370303484 | 38.88594226 |
| GOTERM_BP_FAT | GO:0031400-negative regulation of protein modification process                | 10    | 0.466635558 | 0.0269091 | Q9XT96, Q3TOGR, Q3ZS38, Q02399, Q3T178, Q02703, P18203, P79132, P62261, Q3M024                                                                                                                                                                                                                                                                                                                                                                                                                                                       | 1472       | 27       | 8785      | 2.210396538     | 1          | 0.370303484 | 38.88594226 |
| GOTERM_BP_FAT | GO:0000737-DNA catabolic process, endonucleolytic                             | 7     | 0.3266489   | 0.0278658 | P45478, Q0VC37, P00442, P38447, Q02703, Q08DY9, Q58CZ0                                                                                                                                                                                                                                                                                                                                                                                                                                                                               | 1472       | 15       | 8785      | 2.785099638     | 1          | 0.379085708 | 39.96153177 |
| GOTERM_BP_FAT | GO:0008629-induction of apoptosis by intracellular signals                    | 7     | 0.3266489   | 0.0278658 | P00435, Q0VC36, Q02703, Q2NL36, Q08DY9, A0JNK3, Q0P5F4                                                                                                                                                                                                                                                                                                                                                                                                                                                                               | 1472       | 15       | 8785      | 2.785099638     | 1          | 0.379085708 | 39.96153177 |
| GOTERM_BP_FAT | GO:0007018-microtubule-based movement                                         | 19    | 0.886607559 | 0.0280126 | Q2NL05, Q3MHM5, A7E2Z6, Q5E9M9, Q2T980, Q2KJD0, Q3ZC7, P81947, Q2HJF8, Q08DH4, ASD7N6, Q2HJ86, A6QNT3, A6H7H2, A6QPE8, P23356, Q3ZBD2, A7MBA1, Q29RT6                                                                                                                                                                                                                                                                                                                                                                                | 1472       | 68       | 8785      | 1.667549153     | 1          | 0.379041333 | 40.12490079 |
| GOTERM_BP_FAT | GO:0017038-protein import                                                     | 16    | 0.746616892 | 0.0284074 | A1L567, Q1RMV0, A6QLL2, Q3ZL81, Q1LZB5, Q0P5N5, A7YWD2, Q2TBS1, A1A4I8, Q3SZC1, C1JZ67, Q2KI17, Q3SYV6, Q0G846, Q3ZKP9, A6QPK4                                                                                                                                                                                                                                                                                                                                                                                                       | 1472       | 54       | 8785      | 1.76831723      | 1          | 0.381635568 | 40.56250515 |
| GOTERM_BP_FAT | GO:0000097-sulfur amino acid biosynthetic process                             | 5     | 0.233317779 | 0.0310795 | Q2NL31, Q58DW2, Q4HJ3, A7E3T7, Q0VD27                                                                                                                                                                                                                                                                                                                                                                                                                                                                                                | 1472       | 8        | 8785      | 3.730044158     | 1          | 0.407713604 | 43.44521128 |
| GOTERM_BP_FAT | GO:0043574-peroxisomal transport                                              | 5     | 0.233317779 | 0.0310795 | A1L567, Q2KI17, Q1RMV0, Q3SZD1, A6QPK4                                                                                                                                                                                                                                                                                                                                                                                                                                                                                               | 1472       | 8        | 8785      | 3.730044158     | 1          | 0.407713604 | 43.44521128 |
| GOTERM_BP_FAT | GO:0042744-hydrogen peroxide catabolic process                                | 5     | 0.233317779 | 0.0310795 | Q9BGC3, Q3MHF7, P00435, P35705, P00432, Q5E947                                                                                                                                                                                                                                                                                                                                                                                                                                                                                       | 1472       | 8        | 8785      | 3.730044158     | 1          | 0.407713604 | 43.44521128 |
| GOTERM_BP_FAT | GO:0070301-cellular response to hydrogen peroxide                             | 5     | 0.233317779 | 0.0310795 | Q9BGC3, Q3MHF7, P00435, P35705, P00432, Q5E947                                                                                                                                                                                                                                                                                                                                                                                                                                                                                       | 1472       | 8        | 8785      | 3.730044158     | 1          | 0.407713604 | 43.44521128 |
| GOTERM_BP_FAT | GO:0006625-protein targeting to peroxisome                                    | 5     | 0.233317779 | 0.0310795 | A1L567, Q2KI17, Q1RMV0, Q3SZD1, A6QPK4                                                                                                                                                                                                                                                                                                                                                                                                                                                                                               | 1472       | 8        | 8785      | 3.730044158     | 1          | 0.407713604 | 43.44521128 |
| GOTERM_BP_FAT | GO:0006098-pentose-phosphate shunt                                            | 5     | 0.233317779 | 0.0310795 | A4FUF0, Q3T186, Q5E956, Q2HJ7D, Q3ZC14                                                                                                                                                                                                                                                                                                                                                                                                                                                                                               | 1472       | 8        | 8785      | 3.730044158     | 1          | 0.407713604 | 43.44521128 |
| GOTERM_BP_FAT | GO:0006887-exocytosis                                                         | 16    | 0.746616892 | 0.0332149 | Q17QI5, Q17QF8, A0JN38, Q5E971, P83939, ASD7A2, Q3TOD2, Q0V8C2, P61763, A6QLD1, Q3T000, Q27991, A4FV54, P11023, Q0P5F3, A6QLB1                                                                                                                                                                                                                                                                                                                                                                                                       | 1472       | 55       | 8785      | 1.736166008     | 1          | 0.427277742 | 45.65353959 |
| GOTERM_BP_FAT | GO:0032535-regulation of cellular component size                              | 21    | 0.979934671 | 0.0336212 | Q3ZLP2, Q95KV7, Q5E997, P45478, A4FU48, Q0VC36, Q5E963, Q3T035, Q05B87, Q1LZB2, Q3MHR7, Q08DEB, Q9GK68, Q5E9D5, Q08DES, Q58CQ2, Q3SYX9, Q1JP79, P61157, Q10741, P62998                                                                                                                                                                                                                                                                                                                                                               | 1472       | 79       | 8785      | 1.586449161     | 1          | 0.429516841 | 46.06431991 |
| GOTERM_BP_FAT | GO:0051258-protein polymerization                                             | 10    | 0.466635558 | 0.0339391 | Q3MHM5, Q2T980, Q2HJ86, A5D9D4, A6QNT3, Q3ZKM1, Q2KJD0, Q3ZC7, Q148J6, P81947                                                                                                                                                                                                                                                                                                                                                                                                                                                        | 1472       | 28       | 8785      | 2.131453804     | 1          | 0.430876268 | 46.38373703 |
| GOTERM_BP_FAT | GO:0010608-posttranscriptional regulation of gene expression                  | 22    | 1.026598227 | 0.0341089 | A6QPH1, P68102, Q8G3B3, Q9N0T5, Q2HJ92, Q2TA06, A5D9H5, Q3ZBV3, A2VDR8, Q2T9S7, Q5E988, Q6EWQ7, ASD7H5, A3KN48, Q0VCU1, A7MB16, Q3ZCE2, Q9SL46, Q2NL22, Q2TBP1, Q64719, Q3T0V3                                                                                                                                                                                                                                                                                                                                                       | 1472       | 84       | 8785      | 1.563066123     | 1          | 0.430803358 | 46.55397588 |
| GOTERM_BP_FAT | GO:0016567-protein ubiquitination                                             | 14    | 0.653289781 | 0.0347915 | Q3MHX6, Q0VCL3, Q1RMX2, P63048, A1A4K3, Q32PA5, Q0VCP5, A7MB15, A2VDP1, Q3ZLN1, P62992, Q08E63, Q3ZPF3, Q3ZCC3                                                                                                                                                                                                                                                                                                                                                                                                                       | 1472       | 46       | 8785      | 1.816369329     | 1          | 0.43559473  | 47.23136642 |
| GOTERM_BP_FAT | GO:0006465-signal peptide processing                                          | 4     | 0.186654223 | 0.0359015 | Q3T134, P67810, Q2K136, Q3ZL5                                                                                                                                                                                                                                                                                                                                                                                                                                                                                                        | 1472       | 5        | 8785      | 4.774456522     | 1          | 0.444272634 | 48.3162064  |
| GOTERM_BP_FAT | GO:0007023-post-chaperonin tubulin folding pathway                            | 4     | 0.186654223 | 0.0359015 | Q3SZE9, Q3ZKS0, P48427, Q5E951                                                                                                                                                                                                                                                                                                                                                                                                                                                                                                       | 1472       | 5        | 8785      | 4.774456522     | 1          | 0.444272634 | 48.3162064  |
| GOTERM_BP_FAT | GO:0006534-cysteine metabolic process                                         | 4     | 0.186654223 | 0.0359015 | A5PKG4, Q58DW2, Q3ZS38, Q3SZU4                                                                                                                                                                                                                                                                                                                                                                                                                                                                                                       | 1472       | 5        | 8785      | 4.774456522     | 1          | 0.444272634 | 48.3162064  |
| GOTERM_BP_FAT | GO:0006561-proline biosynthetic process                                       | 4     | 0.186654223 | 0.0359015 | Q58DT4, Q58D08, Q2KH77, A7YWE4                                                                                                                                                                                                                                                                                                                                                                                                                                                                                                       | 1472       | 5        | 8785      | 4.774456522     | 1          | 0.444272634 | 48.3162064  |
| GOTERM_BP_FAT | GO:0046165-alcohol biosynthetic process                                       | 9     | 0.419972002 | 0.0361288 | Q5EA65, Q5E956, Q3SZB7, Q3SZJ9, Q58CR4, Q2NL29, Q29RK2, P33097, Q3ZC14                                                                                                                                                                                                                                                                                                                                                                                                                                                               | 1472       | 24       | 8785      | 2.238026495     | 1          | 0.444666518 | 48.53572504 |

| Category      | Term                                                | Count | %           | PValue    | Genes                                                                                                                                  | List Total | Pop Hits | Pop Total | Fold Enrichment | Bonferroni | Benjamini   | FDR         |
|---------------|-----------------------------------------------------|-------|-------------|-----------|----------------------------------------------------------------------------------------------------------------------------------------|------------|----------|-----------|-----------------|------------|-------------|-------------|
| GOTERM_BP_FAT | GO:0051098--regulation of binding                   | 15    | 0.699953336 | 0.0368908 | A1L567, P62157, Q24JZ4, P35705, P00432, Q3T169, P23196, Q0PSK3, Q3MXX1, Q9BCB3, Q3MHH7, Q08DE0, Q3T0V7, O02703, Q32LD1, Q3ZBD3         | 1472       | 51       | 8785      | 1.755314898     | 1          | 0.449933093 | 49.26528678 |
| GOTERM_BP_FAT | GO:0006195--purine nucleotide catabolic process     | 6     | 0.279981335 | 0.0369113 | Q05927, P56658, Q59HJ6, A7MBI8, P00829, Q2HJ33                                                                                         | 1472       | 12       | 8785      | 2.984035326     | 1          | 0.448421512 | 49.28478108 |
| GOTERM_BP_FAT | GO:0006749--glutathione metabolic process           | 6     | 0.279981335 | 0.0369113 | Q9XSG3, Q32S38, P00435, Q2T9Y6, P00442, Q5EAC2                                                                                         | 1472       | 12       | 8785      | 2.984035326     | 1          | 0.448421512 | 49.28478108 |
| GOTERM_BP_FAT | GO:0006401--RNA catabolic process                   | 8     | 0.373308446 | 0.0378104 | A5DTH5, Q58DH8, A6QPH1, Q8MJJ7, Q2YDD2, Q3ZBV3, Q3T102, Q2NL22                                                                         | 1472       | 20       | 8785      | 2.387228261     | 1          | 0.454809194 | 50.13269966 |
| GOTERM_BP_FAT | GO:0016125--sterol metabolic process                | 14    | 0.653289781 | 0.040979  | P07514, Q3T0N9, Q8WMY2, P00432, Q8WV1, Q1LZ95, A4FUD2, P84466, Q5E9T8, Q58DH7, A6QR14, P19035, Q3ZBE9, Q5E9J5                          | 1472       | 47       | 8785      | 1.777723173     | 1          | 0.480648147 | 53.01544355 |
| GOTERM_BP_FAT | GO:0006720--isoprenoid metabolic process            | 10    | 0.466635558 | 0.0421379 | P56966, Q5E9T8, Q8WMY2, Q5EA65, Q5PX7, A6QR05, Q58CR4, Q1LZ95, P02694, Q3ZC42                                                          | 1472       | 29       | 8785      | 2.057955397     | 1          | 0.488641411 | 54.02987234 |
| GOTERM_BP_FAT | GO:0008203--cholesterol metabolic process           | 13    | 0.606626225 | 0.045522  | P07514, Q3T0N9, Q8WMY2, Q8WV1, P00432, Q1LZ95, A4FUD2, P84466, Q5E9T8, A6QR14, P19035, Q3ZBE9, Q5E9J5                                  | 1472       | 43       | 8785      | 1.80430043      | 1          | 0.514295593 | 56.87510981 |
| GOTERM_BP_FAT | GO:0008344--adult locomotory behavior               | 9     | 0.419972002 | 0.0455842 | Q3TOG8, Q0V8R6, P06623, P45478, Q32KS0, Q5E946, P23356, A0INK3, Q05B87                                                                 | 1472       | 25       | 8785      | 2.148505435     | 1          | 0.513019741 | 56.92584028 |
| GOTERM_BP_FAT | GO:0033365--protein localization in organelle       | 17    | 0.793280448 | 0.0457767 | Q3MHER, A6QLI2, Q32L81, Q1LZB5, Q0PSN5, A2VDR8, A7YWD2, Q3ZC32, Q2TBS1, A1A4I8, Q3SZC1, C1JZ67, Q3SYV6, Q0G846, Q32KP9, Q5EA68, Q2T9U1 | 1472       | 62       | 8785      | 1.636406469     | 1          | 0.512774783 | 57.08237882 |
| GOTERM_BP_FAT | GO:0051017--actin filament bundle formation         | 5     | 0.233317779 | 0.0486648 | P61585, A5D7D1, Q0VCF1, P31976, Q3B7N2                                                                                                 | 1472       | 9        | 8785      | 3.315594807     | 1          | 0.533144392 | 59.36780821 |
| GOTERM_BP_FAT | GO:0009154--purine ribonucleotide catabolic process | 5     | 0.233317779 | 0.0486648 | Q05927, Q59HJ6, A7MBI8, P00829, Q2HJ33                                                                                                 | 1472       | 9        | 8785      | 3.315594807     | 1          | 0.533144392 | 59.36780821 |
| GOTERM_BP_FAT | GO:0009261--ribonucleotide catabolic process        | 5     | 0.233317779 | 0.0486648 | Q05927, Q59HJ6, A7MBI8, P00829, Q2HJ33                                                                                                 | 1472       | 9        | 8785      | 3.315594807     | 1          | 0.533144392 | 59.36780821 |
| GOTERM_BP_FAT | GO:0046112--nucleobase biosynthetic process         | 5     | 0.233317779 | 0.0486648 | Q56JW4, Q2HJ58, P56658, Q59A32, P31754                                                                                                 | 1472       | 9        | 8785      | 3.315594807     | 1          | 0.533144392 | 59.36780821 |
| GOTERM_BP_FAT | GO:0006544--glycine metabolic process               | 5     | 0.233317779 | 0.0486648 | P25285, O46504, P20821, P00376, Q3SZ20                                                                                                 | 1472       | 9        | 8785      | 3.315594807     | 1          | 0.533144392 | 59.36780821 |
| GOTERM_BP_FAT | GO:0051289--protein homotetramerization             | 5     | 0.233317779 | 0.0486648 | Q3ZC55, A0JN14, Q3SZ18, Q3ZBD3, P01096                                                                                                 | 1472       | 9        | 8785      | 3.315594807     | 1          | 0.533144392 | 59.36780821 |

**Table S3. List of significant differentially expressed proteins between different groups.**

| #  | Accession number | Gene symbol | Discription                                                                                                  | MII G vs GVO |          | MII G vs MII B |          |
|----|------------------|-------------|--------------------------------------------------------------------------------------------------------------|--------------|----------|----------------|----------|
|    |                  |             |                                                                                                              | Ratio        | p-value  | Ratio          | p-value  |
| 1  | F1MGJ7           | AUH         | Uncharacterized protein                                                                                      | 11.34        | 9.00E-15 | 1.35           | 9.00E-15 |
| 2  | P13909           | SERPINE1    | Plasminogen activator inhibitor 1                                                                            | 4.63         | 2.70E-06 | 1.00           | 2.70E-06 |
| 3  | F1MZD1           | WEE2        | Uncharacterized protein                                                                                      | 4.51         | 1.85E-11 | 0.30           | 9.97E-02 |
| 4  | Q32PG3           | WDR48       | WD repeat-containing protein 48                                                                              | 4.26         | 4.91E-06 | 3.81           | 4.91E-06 |
| 5  | Q3SZY3           | PTTG1       | Securin                                                                                                      | 4.21         | 1.22E-07 | 1.05           | 1.22E-07 |
| 6  | Q0VCQ5           | KLHL7       | Kelch-like 7 (Drosophila)                                                                                    | 3.19         | 1.79E-03 | 0.99           | 3.38E-01 |
| 7  | E1B7X9           | SMARCAD1    | SWI/SNF-related matrix-associated actin-dependent regulator of chromatin subfamily A containing DEAD/H box 1 | 3.72         | 2.59E-04 | 1.93           | 2.59E-04 |
| 8  | A9Q1J6           | RNF18       | Ring finger protein 18                                                                                       | 3.58         | 8.35E-05 | 1.22           | 8.35E-05 |
| 9  | Q24K09           | DNMT1       | DNA (cytosine-5)-methyltransferase 1                                                                         | 3.56         | 2.69E-05 | 0.57           | 3.27E-01 |
| 10 | Q9TTJ5           | RGN         | Regucalcin                                                                                                   | 10.69        | 2.76E-08 | 0.18           | 3.42E-02 |
| 11 | E1BIJ1           | DEPDC7      | Uncharacterized protein                                                                                      | 3.50         | 3.63E-07 | 0.40           | 1.54E-01 |
| 12 | Q2KJA6           | INTS9       | Integrator complex subunit 9                                                                                 | 3.39         | 6.21E-06 | 1.53           | 6.21E-06 |
| 13 | A2VDY4           | C8H4orf27   | UPF0609 protein C4orf27 homolog                                                                              | 3.27         | 8.17E-04 | 1.11           | 8.17E-04 |
| 14 | F1MLM3           |             | Uncharacterized protein (Fragment)                                                                           | 3.72         | 4.28E-04 | 1.16           | 2.80E-01 |
| 15 | A7E320           | UHRF1       | E3 ubiquitin-protein ligase UHRF1                                                                            | 3.11         | 1.78E-06 | 0.55           | 2.93E-01 |
| 16 | F1MMD5           | XRCC6       | Uncharacterized protein                                                                                      | 3.09         | 6.40E-05 | 0.63           | 3.75E-01 |
| 17 | Q32PA5           | UBE2C       | Ubiquitin-conjugating enzyme E2 C                                                                            | 3.05         | 3.72E-04 | 1.58           | 3.72E-04 |
| 18 | E1BDG7           | USP28       | Ubiquitin carboxyl-terminal hydrolase                                                                        | 3.04         | 8.14E-04 | 1.77           | 8.14E-04 |
| 19 | F1MRT3           | PRC1        | Uncharacterized protein                                                                                      | 2.96         | 7.84E-06 | 0.74           | 3.91E-01 |
| 20 | Q0VCJ5           | MOBK1B      | MOB1, Mps One Binder kinase activator-like 1B (Yeast)                                                        | 2.94         | 1.24E-03 | 1.18           | 1.24E-03 |
| 21 | Q56JV1           | RPS26       | 40S ribosomal protein S26                                                                                    | 2.92         | 1.01E-02 | 1.27           | 3.02E-01 |
| 22 | Q32LB0           | WDR70       | WD repeat-containing protein 70                                                                              | 2.81         | 2.45E-03 | 1.06           | 2.45E-03 |
| 23 | Q2KIP8           | PTPLB       | Very-long-chain (3R)-3-hydroxyacyl-[acyl-carrier protein] dehydratase 2                                      | 2.78         | 1.17E-02 | 4.03           | 3.31E-03 |
| 24 | F1MW01           | ESPL1       | Uncharacterized protein                                                                                      | 2.77         | 1.66E-04 | 0.80           | 1.66E-04 |
| 25 | E1BP79           | WDR47       | Uncharacterized protein                                                                                      | 2.75         | 2.12E-04 | 0.61           | 3.79E-01 |



| #  | Accession number | Gene symbol | Discription                                                 | MII G vs GVO |          | MII G vs MII B |          |
|----|------------------|-------------|-------------------------------------------------------------|--------------|----------|----------------|----------|
|    |                  |             |                                                             | Ratio        | p-value  | Ratio          | p-value  |
| 26 | Q32LN1           | UBE2H       | Ubiquitin-conjugating enzyme E2 H                           | 2.72         | 1.46E-04 | 1.39           | 1.46E-04 |
| 27 | F1N7S0           | TULP3       | Uncharacterized protein                                     | 2.68         | 2.46E-03 | 1.20           | 2.46E-03 |
| 28 | Q1LZ76           | RTN1        | Reticulon                                                   | 2.67         | 1.55E-02 | 3.39           | 4.70E-03 |
| 29 | F6RJG0           | HMGCS1      | Uncharacterized protein (Fragment)                          | 2.66         | 4.79E-05 | 0.26           | 5.86E-02 |
| 30 | Q2KJE0           | TAX1BP1     | Tax1-binding protein 1 homolog                              | 2.95         | 8.31E-03 | 0.92           | 5.00E-01 |
| 31 | E1BN70           | INTS3       | Uncharacterized protein                                     | 2.62         | 1.27E-03 | 1.23           | 1.27E-03 |
| 32 | P61955           | SUMO2       | Small ubiquitin-related modifier 2                          | 2.62         | 2.39E-04 | 0.31           | 9.79E-02 |
| 33 | E1BIU3           |             | Uncharacterized protein                                     | 2.61         | 3.94E-04 | 1.65           | 3.94E-04 |
| 34 | G3MXK7           |             | Uncharacterized protein (Fragment)                          | 0.27         | 3.49E-03 | 0.23           | 4.20E-02 |
| 35 | F1N155           | CLPX        | Uncharacterized protein (Fragment)                          | 2.79         | 6.20E-03 | 1.04           | 3.10E-01 |
| 36 | P48644           | ALDH1A1     | Retinal dehydrogenase 1                                     | 2.58         | 1.17E-04 | 2.06           | 1.17E-04 |
| 37 | F1MBE7           | ACCSL       | Uncharacterized protein (Fragment)                          | 2.54         | 1.29E-05 | 0.78           | 3.94E-01 |
| 38 | F1MYQ1           | TXNDC9      | Thioredoxin domain-containing protein 9                     | 2.51         | 4.38E-04 | 0.59           | 3.54E-01 |
| 39 | Q58D05           | TRAFD1      | TRAF-type zinc finger domain-containing protein 1           | 2.45         | 9.38E-04 | 0.68           | 9.38E-04 |
| 40 | Q08DS5           | NMD3        | 60S ribosomal export protein NMD3                           | 2.42         | 1.58E-03 | 1.62           | 1.58E-03 |
| 41 | Q29RT6           | KIF20A      | Kinesin-like protein KIF20A                                 | 2.38         | 4.32E-03 | 2.28           | 4.32E-03 |
| 42 | F1MW73           | MGC148692   | Uncharacterized protein                                     | 2.38         | 4.18E-03 | 0.43           | 2.24E-01 |
| 43 | Q08DX5           | CDK7        | Cyclin-dependent kinase 7                                   | 2.35         | 6.77E-03 | 1.58           | 6.77E-03 |
| 44 | F1N779           | CLPTM1      | Cleft lip and palate transmembrane protein 1 homolog        | 2.34         | 2.04E-02 | 2.05           | 3.63E-02 |
| 45 | Q5E9T5           | TMEM35      | Transmembrane protein 35                                    | 2.34         | 3.20E-02 | 22.61          | 1.60E-08 |
| 46 | A6QPE8           | KIF2C       | KIF2C protein                                               | 2.33         | 5.46E-03 | 0.71           | 3.83E-01 |
| 47 | F1N6W2           | PPIL4       | Uncharacterized protein                                     | 2.29         | 8.19E-03 | 0.05           | 1.36E-04 |
| 48 | E1BFB5           | KIAA0391    | Uncharacterized protein                                     | 2.29         | 2.97E-03 | 1.76           | 2.97E-03 |
| 49 | Q02367           | NDUFB6      | NADH dehydrogenase [ubiquinone] 1 beta subcomplex subunit 6 | 2.28         | 2.28E-02 | 2.70           | 2.25E-02 |
| 50 | F2Z4J6           | GTF2B       | Transcription initiation factor IIB                         | 2.28         | 1.41E-03 | 1.28           | 1.41E-03 |
| 51 | F1N678           | AKR1B10     | Uncharacterized protein                                     | 2.24         | 1.76E-04 | 2.99           | 1.76E-04 |
| 52 | F1MZT3           | MPHOSPH9    | Uncharacterized protein                                     | 2.23         | 6.66E-03 | 0.49           | 2.44E-01 |
| 53 | Q32PII           | VRK1        | Serine/threonine-protein kinase VRK1                        | 2.22         | 3.33E-03 | 0.34           | 1.35E-01 |
| 54 | A9Q1J5           | MELK        | Maternal embryonic leucine zipper kinase                    | 2.22         | 9.98E-03 | 1.22           | 9.98E-03 |

| #  | Accession number | Gene symbol | Discription                                                          | MII G vs GVO |          | MII G vs MII B |          |
|----|------------------|-------------|----------------------------------------------------------------------|--------------|----------|----------------|----------|
|    |                  |             |                                                                      | Ratio        | p-value  | Ratio          | p-value  |
| 55 | E1BF29           | KIF11       | Uncharacterized protein                                              | 3.01         | 6.88E-03 | 1.16           | 2.73E-01 |
| 56 | Q3SZ73           | ABHD11      | Alpha/beta hydrolase domain-containing protein 11                    | 2.19         | 4.16E-03 | 2.15           | 4.16E-03 |
| 57 | Q5E9J6           | RNF34       | E3 ubiquitin-protein ligase RNF34                                    | 2.16         | 2.42E-03 | 0.92           | 2.42E-03 |
| 58 | Q08DL0           | SLC3A2      | SLC3A2 protein                                                       | 2.15         | 4.86E-02 | 1.49           | 1.80E-01 |
| 59 | E1BQ11           | CTNND1      | Uncharacterized protein                                              | 2.11         | 1.22E-03 | 0.57           | 2.93E-01 |
| 60 | Q5E9J1           | HNRNPF      | Heterogeneous nuclear ribonucleoprotein F                            | 2.09         | 1.36E-03 | 0.95           | 4.09E-01 |
| 61 | A6QLG6           | FXR1        | FXR1 protein                                                         | 2.09         | 3.83E-02 | 1.41           | 2.27E-01 |
| 62 | P62958           | HINT1       | Histidine triad nucleotide-binding protein 1                         | 2.08         | 1.78E-03 | 2.01           | 1.78E-03 |
| 63 | G3MYS0           | LOC508073   | Uncharacterized protein                                              | 2.07         | 7.43E-04 | 0.49           | 2.20E-01 |
| 64 | F1MTR1           | IQGAP2      | Uncharacterized protein                                              | 2.07         | 2.50E-03 | 0.59           | 2.98E-01 |
| 65 | P21839           | BCKDHB      | 2-oxoisovalerate dehydrogenase subunit beta, mitochondrial           | 2.07         | 1.67E-02 | 2.01           | 1.67E-02 |
| 66 | Q3MHR3           | DYNLL2      | Dynein light chain 2, cytoplasmic                                    | 2.06         | 7.03E-04 | 0.75           | 3.73E-01 |
| 67 | Q08DR9           | SPDL1       | Protein Spindly                                                      | 2.06         | 4.96E-03 | 1.14           | 4.96E-03 |
| 68 | F1MRP8           | PLEKHG1     | Uncharacterized protein                                              | 2.06         | 4.26E-03 | 1.70           | 4.26E-03 |
| 69 | Q2YDJ0           | NUSAP1      | Nucleolar and spindle-associated protein 1                           | 2.04         | 5.19E-03 | 0.43           | 2.01E-01 |
| 70 | Q32LN7           | WDR61       | WD repeat-containing protein 61                                      | 2.04         | 8.08E-03 | 0.81           | 4.43E-01 |
| 71 | Q05B58           | CCDC53      | WASH complex subunit CCDC53                                          | 2.04         | 1.38E-02 | 0.85           | 4.63E-01 |
| 72 | F1MV39           |             | Uncharacterized protein (Fragment)                                   | 2.02         | 1.95E-03 | 0.94           | 4.88E-01 |
| 73 | Q3ZBW4           | PCNA        | Proliferating cell nuclear antigen                                   | 2.01         | 1.21E-03 | 0.41           | 1.64E-01 |
| 74 | F1N7F8           | PIGU        | Uncharacterized protein                                              | 1.98         | 4.94E-02 | 2.12           | 3.46E-02 |
| 75 | F1MNK8           | KIF26B      | Uncharacterized protein (Fragment)                                   | 1.92         | 7.94E-03 | 2.09           | 7.94E-03 |
| 76 | F1MUU2           | STK35       | Uncharacterized protein                                              | 3.80         | 4.88E-04 | 0.79           | 4.38E-01 |
| 77 | F1MSQ9           | TMPO        | Uncharacterized protein                                              | 2.59         | 2.18E-02 | 1.14           | 3.17E-01 |
| 78 | Q32KL5           | EMC8        | ER membrane protein complex subunit 8                                | 1.85         | 6.84E-02 | 1.99           | 4.70E-02 |
| 79 | F1MSE7           | SUSD2       | Uncharacterized protein                                              | 1.81         | 8.02E-02 | 2.06           | 4.44E-02 |
| 80 | P80724           | BASP1       | Brain acid soluble protein 1                                         | 1.76         | 1.20E-01 | 2.68           | 1.77E-02 |
| 81 | P23934           | NDUFS6      | NADH dehydrogenase [ubiquinone] iron-sulfur protein 6, mitochondrial | 1.76         | 1.50E-01 | 2.65           | 2.70E-02 |
| 82 | P21327           | INPP1       | Inositol polyphosphate 1-phosphatase                                 | 0.34         | 3.27E-02 | 0.18           | 3.54E-02 |
| 83 | A7MB57           | YES1        | Uncharacterized protein                                              | 2.63         | 1.39E-02 | 1.07           | 2.83E-01 |

| #   | Accession number | Gene symbol | Discription                                                                   | MII G vs GVO |          | MII G vs MII B |          |
|-----|------------------|-------------|-------------------------------------------------------------------------------|--------------|----------|----------------|----------|
|     |                  |             |                                                                               | Ratio        | p-value  | Ratio          | p-value  |
| 84  | A6QLV6           | KCTD10      | KCTD10 protein                                                                | 1.72         | 3.08E-02 | 2.27           | 3.08E-02 |
| 85  | Q3SZU4           | CDO1        | Cysteine dioxygenase type 1                                                   | 0.51         | 6.66E-02 | 0.24           | 4.52E-02 |
| 86  | Q2NKY7           | SEPT2       | Septin-2                                                                      | 0.59         | 1.51E-01 | 2.19           | 3.56E-02 |
| 87  | Q02827           | NDUFC2      | NADH dehydrogenase [ubiquinone] 1 subunit C2                                  | 1.65         | 1.46E-01 | 2.13           | 4.40E-02 |
| 88  | F1N0F7           | EIF5        | Uncharacterized protein                                                       | 0.43         | 4.41E-02 | 0.28           | 8.70E-02 |
| 89  | Q3ZBD3           | PCBD1       | Pterin-4-alpha-carbinolamine dehydratase                                      | 0.40         | 5.29E-02 | 0.19           | 4.25E-02 |
| 90  | P10790           | FABP3       | Fatty acid-binding protein, heart                                             | 0.34         | 4.86E-02 | 0.31           | 1.18E-01 |
| 91  | Q58DC0           | CPPED1      | Calcineurin-like phosphoesterase domain-containing protein 1                  | 0.53         | 7.64E-02 | 0.22           | 3.87E-02 |
| 92  | Q08DQ1           | CAMK1       | Calcium/calmodulin-dependent protein kinase I                                 | 0.44         | 6.04E-02 | 2.24           | 4.54E-02 |
| 93  | Q32KL9           | BCAP29      | B-cell receptor-associated protein 29                                         | 1.85         | 6.44E-02 | 3.39           | 4.71E-03 |
| 94  | P55052           | FABP5       | Fatty acid-binding protein, epidermal                                         | 0.36         | 3.83E-02 | 0.38           | 1.37E-01 |
| 95  | F1MC72           | UBE2L3      | Ubiquitin-conjugating enzyme E2 L3 (Fragment)                                 | 0.45         | 3.89E-02 | 0.37           | 1.27E-01 |
| 96  | Q58DK5           | ALAD        | Delta-aminolevulinic acid dehydratase                                         | 0.32         | 1.67E-02 | 0.19           | 3.54E-02 |
| 97  | P56966           | GGPS1       | Geranylgeranyl pyrophosphate synthase                                         | 0.42         | 4.46E-02 | 0.27           | 6.52E-02 |
| 98  | Q32PA4           | PHPT1       | 14 kDa phosphohistidine phosphatase                                           | 0.39         | 4.05E-02 | 0.28           | 8.51E-02 |
| 99  | A5PK65           | DDT         | D-dopachrome decarboxylase                                                    | 0.30         | 2.05E-02 | 0.19           | 3.83E-02 |
| 100 | E1B7T3           | NUDT15      | Uncharacterized protein                                                       | 0.22         | 2.73E-03 | 0.18           | 1.72E-02 |
| 101 | Q288C4           | NLRP9       | NACHT, LRR and PYD domains-containing protein 9                               | 1.35         | 2.90E-01 | 3.85           | 4.13E-03 |
| 102 | P11023           | RAB3A       | Ras-related protein Rab-3A                                                    | 2.11         | 3.46E-02 | 2.93           | 7.61E-03 |
| 103 | F1MNP4           | RPS6KB1     | Ribosomal protein S6 kinase                                                   | 0.41         | 3.78E-02 | 0.23           | 4.48E-02 |
| 104 | P56658           | ADA         | Adenosine deaminase                                                           | 0.24         | 3.62E-03 | 0.26           | 7.50E-02 |
| 105 | Q3ZC07           | ACTC1       | Actin, alpha cardiac muscle 1                                                 | 0.76         | 2.65E-01 | 33.61          | 4.75E-14 |
| 106 | P80177           | MIF         | Macrophage migration inhibitory factor                                        | 0.39         | 4.76E-02 | 2.23           | 5.64E-02 |
| 107 | Q32KP9           | NUTF2       | Nuclear transport factor 2                                                    | 0.35         | 3.47E-02 | 0.22           | 4.64E-02 |
| 108 | Q32L10           | TMEM205     | Transmembrane protein 205                                                     | 1.88         | 7.51E-02 | 2.84           | 1.55E-02 |
| 109 | Q0IIB1           | PHYHD1      | Phytanoyl-CoA dioxygenase domain-containing protein 1                         | 0.43         | 4.61E-02 | 0.27           | 6.00E-02 |
| 110 | Q2T9S0           | TUBB3       | Tubulin beta-3 chain                                                          | 0.93         | 3.35E-01 | 2.48           | 2.00E-02 |
| 111 | Q0P5D9           | ALG8        | Probable dolichyl pyrophosphate Glc1Man9GlcNAc2 alpha-1,3-glucosyltransferase | 2.07         | 3.69E-02 | 2.49           | 1.71E-02 |

| #   | Accession number | Gene symbol | Discription                                                                     | MII G vs GVO |          | MII G vs MII B |          |
|-----|------------------|-------------|---------------------------------------------------------------------------------|--------------|----------|----------------|----------|
|     |                  |             |                                                                                 | Ratio        | p-value  | Ratio          | p-value  |
| 112 | Q02380           | NDUFB5      | NADH dehydrogenase [ubiquinone] 1 beta subcomplex subunit 5, mitochondrial      | 1.75         | 1.03E-01 | 7.60           | 2.65E-05 |
| 113 | G3X705           | MRPS6       | Uncharacterized protein                                                         | 1.22         | 4.50E-01 | 2.98           | 1.85E-02 |
| 114 | E1BE86           | CCS         | Uncharacterized protein                                                         | 0.42         | 3.79E-02 | 0.23           | 5.13E-02 |
| 115 | A2VDW4           | TMED3       | Transmembrane emp24 protein transport domain containing 3                       | 2.57         | 1.83E-02 | 2.04           | 8.64E-02 |
| 116 | F1MJW8           | CALB2       | Calretinin                                                                      | 0.43         | 4.77E-02 | 0.53           | 2.72E-01 |
| 117 | Q6B4J2           | VKORC1      | Vitamin K epoxide reductase complex subunit 1                                   | 2.21         | 5.21E-02 | 2.35           | 4.68E-02 |
| 118 | E1BF18           | RAB3C       | Ras-related protein Rab-3C                                                      | 1.67         | 1.78E-01 | 3.24           | 7.69E-03 |
| 119 | A5D977           | RALB        | RALB protein                                                                    | 1.72         | 1.31E-01 | 3.08           | 1.50E-02 |
| 120 | Q0II26           | AIMP2       | Aminoacyl tRNA synthase complex-interacting multifunctional protein 2           | 1.30         | 3.65E-01 | 2.24           | 4.57E-02 |
| 121 | Q3SZ18           | HPRT1       | Hypoxanthine-guanine phosphoribosyltransferase                                  | 0.37         | 2.53E-02 | 0.28           | 8.78E-02 |
| 122 | Q95142           | PDE6D       | Retinal rod rhodopsin-sensitive cGMP 3,5-cyclic phosphodiesterase subunit delta | 0.27         | 7.64E-03 | 0.14           | 1.26E-02 |
| 123 | Q5E9K0           | PSMB2       | Proteasome subunit beta type-2                                                  | 1.17         | 4.86E-01 | 6.66           | 3.41E-05 |
| 124 | Q148J4           | RAB2A       | RAB2A, member RAS oncogene family                                               | 1.72         | 1.67E-01 | 2.40           | 2.68E-02 |
| 125 | H9GW43           | RNH1        | Uncharacterized protein                                                         | 0.41         | 3.98E-02 | 0.22           | 4.02E-02 |
| 126 | P52505           | NDUFAB1     | Acyl carrier protein, mitochondrial                                             | 1.15         | 4.84E-01 | 4.04           | 4.13E-03 |
| 127 | Q4F894           | CLCN4       | Chloride channel 4                                                              | 2.36         | 2.11E-02 | 1.69           | 1.01E-01 |
| 128 | F1MTN1           | ITGB3       | Integrin beta                                                                   | 2.61         | 1.81E-02 | 1.37           | 1.83E-01 |
| 129 | A0JNQ6           | OOEP        | Oocyte-expressed protein homolog                                                | 1.27         | 3.69E-01 | 2.35           | 4.29E-02 |
| 130 | P61085           | UBE2K       | Ubiquitin-conjugating enzyme E2 K                                               | 0.52         | 6.59E-02 | 0.24           | 4.95E-02 |
| 131 | Q32KU6           | TSPAN6      | Tetraspanin-6                                                                   | 2.97         | 7.55E-03 | 3.59           | 3.09E-03 |
| 132 | Q0VCI6           | PIH1D1      | PIH1 domain-containing protein 1                                                | 0.47         | 6.04E-02 | 0.23           | 4.86E-02 |
| 133 | Q3MHJ8           | STMN2       | Stathmin                                                                        | 0.43         | 4.88E-02 | 0.32           | 9.68E-02 |
| 134 | Q3T025           | RPL17       | 60S ribosomal protein L17                                                       | 2.09         | 3.50E-02 | 2.35           | 3.79E-02 |
| 135 | F1ML72           | RPL34       | Uncharacterized protein (Fragment)                                              | 1.79         | 8.52E-02 | 2.16           | 4.09E-02 |
| 136 | Q58DM8           | ECHS1       | Enoyl-CoA hydratase, mitochondrial                                              | 1.36         | 3.23E-01 | 3.28           | 7.96E-03 |
| 137 | Q29463           |             | Anionic trypsin                                                                 | 0.24         | 3.05E-03 | 0.23           | 4.80E-02 |
| 138 | F1MBM4           | ARL6IP1     | Uncharacterized protein                                                         | 2.05         | 4.85E-02 | 1.95           | 9.66E-02 |

| #   | Accession number | Gene symbol | Discription                                                                       | MII G vs GVO |          | MII G vs MII B |          |
|-----|------------------|-------------|-----------------------------------------------------------------------------------|--------------|----------|----------------|----------|
|     |                  |             |                                                                                   | Ratio        | p-value  | Ratio          | p-value  |
| 139 | Q2TBQ5           | RPL7A       | 60S ribosomal protein L7a                                                         | 2.57         | 1.73E-02 | 1.81           | 1.04E-01 |
| 140 | E1BNJ0           | TMEM33      | Uncharacterized protein                                                           | 1.90         | 1.05E-01 | 2.60           | 3.14E-02 |
| 141 | Q3ZBF9           | PDXP        | Pyridoxal phosphate phosphatase                                                   | 0.35         | 3.59E-02 | 0.17           | 3.32E-02 |
| 142 | A6QLS5           | MGC143209   | MGC143209 protein                                                                 | 2.00         | 4.66E-02 | 1.96           | 7.76E-02 |
| 143 | Q58DA0           | PSMD4       | 26S proteasome non-ATPase regulatory subunit 4                                    | 1.06         | 4.37E-01 | 2.68           | 2.71E-02 |
| 144 | G3X6Y2           | CXorf38     | Uncharacterized protein                                                           | 0.42         | 3.67E-02 | 0.24           | 3.94E-02 |
| 145 | Q148J1           | TSPAN7      | Tetraspanin 7                                                                     | 1.86         | 1.13E-01 | 11.68          | 2.81E-06 |
| 146 | G3MZV0           |             | Uncharacterized protein                                                           | 1.05         | 4.69E-01 | 2.44           | 3.30E-02 |
| 147 | Q1LZB2           | NCK1        | NCK adaptor protein 1                                                             | 0.41         | 4.41E-02 | 0.42           | 2.15E-01 |
| 148 | F1MWB9           | GNL1        | Uncharacterized protein                                                           | 0.47         | 4.71E-02 | 0.19           | 2.79E-02 |
| 149 | Q3SZI6           | RPN2        | Doncnyl-diphosphoingosaccharide--protein glycosyltransferase subunit 2            | 2.10         | 4.84E-02 | 1.86           | 1.17E-01 |
| 150 | P82916           | MRPS17      | 28S ribosomal protein S17, mitochondrial                                          | 1.71         | 9.34E-02 | 2.14           | 3.75E-02 |
| 151 | Q17R06           | RAB21       | Ras-related protein Rab-21                                                        | 1.50         | 2.33E-01 | 2.31           | 4.49E-02 |
| 152 | Q2KHW4           | SLC25A15    | Solute carrier family 25 (Mitochondrial carrier; ornithine transporter) member 15 | 1.98         | 6.43E-02 | 2.97           | 1.74E-02 |
| 153 | Q85BD6           | ND5         | NADH-ubiquinone oxidoreductase chain 5                                            | 2.43         | 8.00E-03 | 2.41           | 2.63E-02 |
| 154 | Q05204           | LAMP1       | Lysosome-associated membrane glycoprotein 1                                       | 1.50         | 2.52E-01 | 2.56           | 3.36E-02 |
| 155 | Q2KHX4           | SEC61A2     | Protein transport protein Sec61 subunit alpha isoform 2                           | 2.23         | 1.97E-02 | 2.50           | 2.69E-02 |
| 156 | F1MYN2           | CGN         | Uncharacterized protein                                                           | 2.28         | 2.19E-02 | 1.81           | 8.32E-02 |
| 157 | Q58DH7           | SIGMAR1     | Sigma non-opioid intracellular receptor 1                                         | 1.71         | 1.13E-01 | 3.15           | 5.71E-03 |
| 158 | P12234-2         |             | Isoform B of Phosphate carrier protein, mitochondrial                             | 1.76         | 1.41E-01 | 2.21           | 4.31E-02 |
| 159 | F1MX01           | PNLDC1      | Uncharacterized protein                                                           | 1.71         | 1.49E-01 | 2.46           | 3.19E-02 |
| 160 | Q3T0F4           | RPS10       | 40S ribosomal protein S10                                                         | 1.31         | 3.17E-01 | 2.61           | 2.44E-02 |
| 161 | E1BAK9           | SYVN1       | Uncharacterized protein                                                           | 1.62         | 1.87E-01 | 4.50           | 2.20E-03 |
| 162 | F1MYW7           | HM13        | Uncharacterized protein                                                           | 1.88         | 9.31E-02 | 3.12           | 1.91E-02 |
| 163 | Q3SZA6           | SDCBP       | Syndecan binding protein (Syntenin)                                               | 1.69         | 1.75E-01 | 9.08           | 2.32E-05 |
| 164 | F1MBS4           | MRPL12      | 39S ribosomal protein L12, mitochondrial (Fragment)                               | 1.78         | 1.36E-01 | 2.40           | 3.73E-02 |
| 165 | F1N5H3           | PEX3        | Peroxisomal biogenesis factor 3                                                   | 2.05         | 3.42E-02 | 2.10           | 3.69E-02 |
| 166 | E1BEI2           | SPCS2       | Uncharacterized protein                                                           | 2.74         | 1.25E-02 | 4.03           | 2.57E-03 |

| #   | Accession number | Gene symbol | Discription                                                          | MII G vs GVO |          | MII G vs MII B |          |
|-----|------------------|-------------|----------------------------------------------------------------------|--------------|----------|----------------|----------|
|     |                  |             |                                                                      | Ratio        | p-value  | Ratio          | p-value  |
| 167 | P17694           | NDUFS2      | NADH dehydrogenase [ubiquinone] iron-sulfur protein 2, mitochondrial | 2.34         | 3.42E-02 | 1.65           | 1.54E-01 |
| 168 | G3N220           |             | Uncharacterized protein                                              | 0.94         | 4.11E-01 | 4.05           | 1.54E-03 |
| 169 | Q5EAE0           | ERGIC3      | Endoplasmic reticulum-Golgi intermediate compartment protein 3       | 1.78         | 1.21E-01 | 2.66           | 2.78E-02 |
| 170 | A7YY65           | MTCH1       | MTCH1 protein                                                        | 1.95         | 8.07E-02 | 2.51           | 2.85E-02 |
| 171 | Q17QI9           | TMEM55B     | Transmembrane protein 55B                                            | 2.06         | 3.50E-02 | 1.76           | 9.43E-02 |
| 172 | F1N3U0           | HSD11B2     | Corticosteroid 11-beta-dehydrogenase isozyme 2                       | 1.68         | 1.77E-01 | 2.25           | 4.41E-02 |
| 173 | Q2HJD7           | HIBADH      | 3-hydroxyisobutyrate dehydrogenase, mitochondrial                    | 1.40         | 3.25E-01 | 3.36           | 7.97E-03 |
| 174 | F1MQ37           | MYH9        | Uncharacterized protein                                              | 9.28         | 2.44E-08 | 4.94           | 1.43E-03 |
| 175 | E1BCH6           | ISPD        | Isoprenoid synthase domain-containing protein                        | 0.46         | 4.74E-02 | 0.26           | 6.23E-02 |
| 176 | F2Z4I9           | PAM16       | Magmas-like protein                                                  | 0.91         | 3.84E-01 | 2.50           | 1.34E-02 |
| 177 | Q3ZCD7           | TECR        | Very-long-chain enoyl-CoA reductase                                  | 1.92         | 1.00E-01 | 2.77           | 1.75E-02 |
| 178 | F1MNS5           | ENPP1       | Uncharacterized protein                                              | 3.08         | 4.53E-03 | 3.13           | 6.57E-03 |
| 179 | Q3ZBB0           | SLC35B2     | Solute carrier family 35, member B2                                  | 2.27         | 2.18E-02 | 2.33           | 2.28E-02 |
| 180 | Q05752           | NDUFA7      | NADH dehydrogenase [ubiquinone] 1 alpha subcomplex subunit 7         | 1.68         | 1.53E-01 | 2.45           | 2.99E-02 |
| 181 | Q1LZB5           | TOMM40      | Mitochondrial import receptor subunit TOM40 homolog                  | 1.78         | 9.52E-02 | 6.74           | 5.08E-05 |
| 182 | G3N348           | WFS1        | Uncharacterized protein                                              | 2.28         | 1.57E-02 | 2.39           | 3.07E-02 |
| 183 | P18246           | GJA1        | Gap junction alpha-1 protein                                         | 1.76         | 9.43E-02 | 2.47           | 2.09E-02 |
| 184 | G5E5V7           |             | Uncharacterized protein (Fragment)                                   | 0.88         | 3.38E-01 | 9.45           | 1.44E-06 |
| 185 | Q58DW0           | RPL4        | 60S ribosomal protein L4                                             | 1.29         | 4.14E-01 | 2.28           | 4.98E-02 |
| 186 | Q2KHZ9           | GCDH        | Glutaryl-CoA dehydrogenase, mitochondrial                            | 1.26         | 3.58E-01 | 9.94           | 3.66E-05 |
| 187 | O02691           | HSD17B10    | 3-hydroxyacyl-CoA dehydrogenase type-2                               | 1.25         | 3.61E-01 | 2.52           | 3.12E-02 |
| 188 | F1MS81           | RMND1       | Uncharacterized protein                                              | 1.81         | 8.92E-02 | 5.89           | 1.12E-04 |
| 189 | Q17QB3           | ASAH1       | Acid ceramidase                                                      | 1.41         | 2.87E-01 | 3.70           | 4.91E-03 |
| 190 | P48830           | ZP3         | Zona pellucida sperm-binding protein 3                               | 1.76         | 1.02E-01 | 2.76           | 2.57E-02 |
| 191 | F1MLS8           | KIAA1217    | Uncharacterized protein                                              | 0.85         | 3.55E-01 | 0.17           | 2.60E-02 |
| 192 | Q3SZU5           | SPCS3       | Signal peptidase complex subunit 3                                   | 1.62         | 1.82E-01 | 2.43           | 3.89E-02 |
| 193 | Q0P5D6           | RARRES1     | Retinoic acid receptor responder (Tazarotene induced) 1              | 1.78         | 1.32E-01 | 2.76           | 1.84E-02 |
| 194 | A6QL85           | RCC2        | RCC2 protein                                                         | 0.48         | 8.47E-02 | 0.20           | 4.70E-02 |
| 195 | C3V9V7           | TMED2       | RNP24                                                                | 1.69         | 1.69E-01 | 2.51           | 2.82E-02 |

| #   | Accession number | Gene symbol | Discription                                                                       | MII G vs GVO |          | MII G vs MII B |          |
|-----|------------------|-------------|-----------------------------------------------------------------------------------|--------------|----------|----------------|----------|
|     |                  |             |                                                                                   | Ratio        | p-value  | Ratio          | p-value  |
| 196 | E1BH40           | MYCBP2      | Uncharacterized protein                                                           | 1.71         | 1.12E-01 | 2.91           | 9.24E-03 |
| 197 | Q0II48           | BCL2L15     | Bcl-2-like protein 15                                                             | 0.30         | 7.71E-03 | 0.17           | 1.10E-02 |
| 198 | F1N6P2           | SURF1       | Uncharacterized protein                                                           | 1.48         | 2.35E-01 | 3.13           | 1.12E-02 |
| 199 | F6QF86           | ALG6        | Uncharacterized protein                                                           | 2.01         | 8.32E-02 | 2.37           | 4.29E-02 |
| 200 | G8JKY0           | RPS8        | 40S ribosomal protein S8 (Fragment)                                               | 2.31         | 3.59E-02 | 1.93           | 7.77E-02 |
| 201 | F1MY99           | UBASH3A     | Uncharacterized protein                                                           | 0.36         | 2.25E-02 | 0.30           | 7.33E-02 |
| 202 | P83095           | LACTB       | Serine beta-lactamase-like protein LACTB, mitochondrial                           | 1.75         | 1.53E-01 | 6.08           | 3.47E-04 |
| 203 | Q3T003           | RPL18A      | 60S ribosomal protein L18a                                                        | 1.73         | 1.22E-01 | 2.48           | 2.99E-02 |
| 204 | Q08D83-2         |             | Isoform 2 of Reticulon-3                                                          | 1.85         | 1.00E-01 | 3.02           | 1.27E-02 |
| 205 | P00125           | CYC1        | Cytochrome c1, heme protein, mitochondrial                                        | 1.66         | 1.59E-01 | 2.16           | 4.78E-02 |
| 206 | Q02375           | NDUFS4      | NADH dehydrogenase [ubiquinone] iron-sulfur protein 4, mitochondrial              | 2.16         | 2.60E-02 | 4.75           | 7.53E-04 |
| 207 | Q05927           | NT5E        | 5-nucleotidase                                                                    | 1.91         | 1.08E-01 | 2.28           | 4.66E-02 |
| 208 | Q3T0D5           | RPL30       | 60S ribosomal protein L30                                                         | 1.26         | 3.96E-01 | 2.66           | 3.36E-02 |
| 209 | Q3SZ90           | RPL13A      | 60S ribosomal protein L13a                                                        | 1.56         | 2.06E-01 | 3.37           | 1.04E-02 |
| 210 | Q58DT1           | RPL7        | 60S ribosomal protein L7                                                          | 1.53         | 2.17E-01 | 2.34           | 3.96E-02 |
| 211 | P61257           | RPL26       | 60S ribosomal protein L26                                                         | 2.29         | 3.95E-02 | 3.14           | 1.01E-02 |
| 212 | F1ML49           | KIAA0319L   | Uncharacterized protein (Fragment)                                                | 2.25         | 2.02E-02 | 2.00           | 7.26E-02 |
| 213 | Q27991           | MYH10       | Myosin-10                                                                         | 7.54         | 3.27E-09 | 4.47           | 4.27E-04 |
| 214 | Q2KJ28           | PGS1        | CDP-diacylglycerol--glycerol-3-phosphate 3-phosphatidyltransferase, mitochondrial | 1.63         | 1.90E-01 | 2.88           | 1.48E-02 |
| 215 | Q5E9P6           | BSCL2       | Seipin                                                                            | 1.05         | 4.85E-01 | 2.06           | 3.69E-02 |
| 216 | E1BA82           | UBAP2       | Uncharacterized protein                                                           | 0.76         | 2.71E-01 | 2.30           | 2.38E-02 |
| 217 | F1N5T9           | SERINC5     | Uncharacterized protein (Fragment)                                                | 2.17         | 2.30E-02 | 2.47           | 3.03E-02 |
| 218 | E1BKT9           | DSP         | Uncharacterized protein                                                           | 0.73         | 2.32E-01 | 0.19           | 2.88E-02 |
| 219 | A7MB95           | CUGBP1      | CUGBP1 protein                                                                    | 1.13         | 4.88E-01 | 2.51           | 4.44E-02 |
| 220 | Q9N285           | MTCH2       | Mitochondrial carrier homolog 2                                                   | 1.56         | 2.07E-01 | 3.05           | 1.40E-02 |
| 221 | Q5EA68           | SEC61A1     | Protein transport protein Sec61 subunit alpha isoform 1                           | 2.12         | 4.01E-02 | 1.77           | 1.29E-01 |
| 222 | Q1JQD0           | HSD17B1     | Hydroxysteroid (17-beta) dehydrogenase 1                                          | 2.21         | 4.55E-02 | 1.76           | 1.31E-01 |

| #   | Accession number | Gene symbol | Discription                                                                             | MII G vs GVO |          | MII G vs MII B |          |
|-----|------------------|-------------|-----------------------------------------------------------------------------------------|--------------|----------|----------------|----------|
|     |                  |             |                                                                                         | Ratio        | p-value  | Ratio          | p-value  |
| 223 | Q3ZCA7           | GNAI3       | Guanine nucleotide binding protein (G protein), alpha inhibiting activity polypeptide 3 | 1.57         | 2.20E-01 | 2.36           | 3.87E-02 |
| 224 | A6QNY1           | CD320       | CD320 antigen                                                                           | 2.50         | 1.58E-02 | 2.78           | 2.45E-02 |
| 225 | F1N2X1           | SLC12A6     | Uncharacterized protein                                                                 | 2.08         | 4.41E-02 | 1.41           | 2.42E-01 |
| 226 | F1MYX5           | LCP1        | Uncharacterized protein                                                                 | 0.61         | 3.92E-02 | 0.49           | 3.92E-02 |
| 227 | F1MYS7           | EIF4B       | Uncharacterized protein                                                                 | 0.42         | 3.49E-02 | 0.17           | 1.47E-02 |
| 228 | Q5E9Q0           | NIP30       | NEFA-interacting nuclear protein NIP30                                                  | 0.48         | 7.70E-02 | 0.22           | 3.67E-02 |
| 229 | F6RFX1           | CHST12      | Uncharacterized protein                                                                 | 1.72         | 1.49E-01 | 2.85           | 1.34E-02 |
| 230 | A4IF97           | MYL12B      | Myosin regulatory light chain 12B                                                       | 1.28         | 3.40E-01 | 2.44           | 3.26E-02 |
| 231 | Q32L96           | PHYHIPL     | Phytanoyl-CoA hydroxylase interacting protein-like                                      | 0.34         | 1.43E-02 | 0.30           | 1.03E-01 |
| 232 | C4T8B4           | CRP         | C-reactive protein                                                                      | 0.50         | 6.42E-03 | 0.72           | 6.42E-03 |
| 233 | Q3T075           | STX8        | Syntaxin-8                                                                              | 0.49         | 5.16E-03 | 1.02           | 3.53E-01 |
| 234 | F1N405           | RTN4        | Reticulon                                                                               | 0.48         | 6.22E-05 | 1.23           | 2.85E-01 |
| 235 | E1BMJ5           | PNPLA6      | Uncharacterized protein                                                                 | 0.47         | 5.74E-03 | 0.98           | 4.63E-01 |
| 236 | F1MUS6           | RELN        | Reelin (Fragment)                                                                       | 0.47         | 8.25E-03 | 0.43           | 8.25E-03 |
| 237 | F1MHU9           | CNOT1       | Uncharacterized protein                                                                 | 0.46         | 6.62E-03 | 0.61           | 6.62E-03 |
| 238 | Q0VCY6           | MBOAT7      | Lysophospholipid acyltransferase 7                                                      | 0.46         | 2.91E-03 | 1.58           | 9.40E-02 |
| 239 | E1BEV2           | MTMR7       | Uncharacterized protein                                                                 | 0.45         | 4.99E-02 | 0.31           | 8.46E-02 |
| 240 | Q0V8E7           | STRA6       | Stimulated by retinoic acid gene 6 protein homolog                                      | 0.44         | 2.06E-06 | 1.66           | 1.59E-01 |
| 241 | Q3T0V2           | ACY1        | Aminoacylase 1                                                                          | 0.44         | 3.64E-02 | 0.24           | 4.76E-02 |
| 242 | F1MCP8           | CAPRIN2     | Uncharacterized protein (Fragment)                                                      | 0.43         | 4.81E-05 | 1.02           | 4.36E-01 |
| 243 | F1MT25           | HDLBP       | Uncharacterized protein                                                                 | 0.43         | 9.98E-04 | 0.73           | 4.50E-01 |
| 244 | E1BPY5           | MFSD8       | Uncharacterized protein                                                                 | 0.43         | 9.79E-04 | 0.45           | 9.79E-04 |
| 245 | F1N3H0           | DCAF8       | Uncharacterized protein                                                                 | 0.43         | 4.81E-04 | 0.99           | 3.25E-01 |
| 246 | F1MBV6           | TPD52       | Uncharacterized protein                                                                 | 0.42         | 3.81E-02 | 0.29           | 9.26E-02 |
| 247 | E1BNN6           | NLRP1       | Uncharacterized protein                                                                 | 0.42         | 1.67E-03 | 0.70           | 1.67E-03 |
| 248 | F1MVS4           | NOL3        | Uncharacterized protein                                                                 | 0.37         | 3.45E-02 | 0.41           | 8.42E-04 |
| 249 | E1BPE9           | KHDC3L      | Uncharacterized protein                                                                 | 0.41         | 5.44E-08 | 1.59           | 2.06E-01 |
| 250 | Q9TS87           | TAGLN       | Transgelin                                                                              | 0.40         | 4.55E-02 | 0.40           | 1.82E-01 |



| #   | Accession number | Gene symbol | Discription                                                                                      | MII G vs GVO |          | MII G vs MII B |          |
|-----|------------------|-------------|--------------------------------------------------------------------------------------------------|--------------|----------|----------------|----------|
|     |                  |             |                                                                                                  | Ratio        | p-value  | Ratio          | p-value  |
| 251 | Q3T0V7           | EDF1        | Endothelial differentiation-related factor 1                                                     | 0.38         | 2.40E-02 | 0.35           | 1.16E-01 |
| 252 | E1BCN1           | LPIN2       | Uncharacterized protein                                                                          | 0.38         | 5.46E-07 | 0.72           | 3.72E-01 |
| 253 | F1MNG7           | LZTFL1      | Leucine zipper transcription factor-like protein 1 (Fragment)                                    | 0.37         | 3.28E-02 | 0.24           | 6.52E-02 |
| 254 | Q3T0S5           | ALDOB       | Fructose-bisphosphate aldolase B                                                                 | 0.37         | 2.48E-02 | 0.27           | 6.43E-02 |
| 255 | F1N214           | ENAH        | Uncharacterized protein                                                                          | 0.37         | 1.52E-05 | 0.90           | 5.00E-01 |
| 256 | Q58DT6           | ARHGDIA     | Rho GDP dissociation inhibitor (GDI) alpha                                                       | 0.35         | 3.13E-02 | 0.17           | 3.05E-02 |
| 257 | Q1PSA0           | ZAR1        | Uncharacterized protein                                                                          | 0.34         | 7.40E-08 | 1.22           | 4.22E-01 |
| 258 | Q17Q89           | PFDN6       | Prefoldin subunit 6                                                                              | 0.31         | 1.12E-02 | 0.29           | 7.89E-02 |
| 259 | Q2KJJ1           | SLC25A17    | Solute carrier family 25 (Mitochondrial carrier; peroxisomal membrane protein, 34kDa), member 17 | 0.28         | 1.79E-05 | 0.21           | 1.79E-05 |
| 260 | P37359           | MT3         | Metallothionein-3                                                                                | 0.25         | 1.40E-03 | 0.19           | 2.69E-02 |
| 261 | Q5KR47-2         |             | Isoform 2 of Tropomyosin alpha-3 chain                                                           | 0.20         | 2.58E-11 | 0.87           | 4.35E-01 |
| 262 | G3N0V0           |             | Uncharacterized protein (Fragment)                                                               | 0.20         | 3.44E-03 | 0.13           | 1.60E-02 |
| 263 | P81282-4         |             | Isoform V3 of Versican core protein                                                              | 0.16         | 2.19E-04 | 1.21           | 2.95E-01 |
| 264 | Q3T0C8           | PDLIM2      | PDZ and LIM domain protein 2                                                                     | 0.14         | 5.83E-14 | 0.73           | 4.61E-01 |
| 265 | F1MSH0           | CPEB1       | Uncharacterized protein (Fragment)                                                               | 0.11         | 1.15E-30 | 0.36           | 1.15E-30 |

**Table S4. GO categorization clustering of differentially expressed proteins.**

**Cluster 1**

| Category      | Term                                                            | Count | %        | P Value  | Genes                                                                                  | List Total | Pop Hits | Pop Total | Fold Enrichment | Bonferroni | Benjamini | FDR      |
|---------------|-----------------------------------------------------------------|-------|----------|----------|----------------------------------------------------------------------------------------|------------|----------|-----------|-----------------|------------|-----------|----------|
| GOTERM_BP_FAT | GO:0022900~electron transport chain                             | 7     | 12.5     | 1.99E-06 | Q02375, P00125, Q02380, Q05752, Q02827, P52505, P23934                                 | 40         | 87       | 8785      | 17.67098        | 5.15E-04   | 5.15E-04  | 0.002599 |
| GOTERM_BP_FAT | GO:0055114~oxidation reduction                                  | 11    | 19.64286 | 5.76E-05 | Q02375, P00125, Q2KHZ9, Q02380, Q05752, O02691, Q02827, P52505, Q3ZCD7, Q2HJD7, P23934 | 40         | 513      | 8785      | 4.709308        | 0.014817   | 0.007436  | 0.075262 |
| GOTERM_BP_FAT | GO:0006120~mitochondrial electron transport, NADH to ubiquinone | 3     | 5.357143 | 2.85E-04 | Q05752, Q02827, P52505                                                                 | 40         | 6        | 8785      | 109.8125        | 0.071131   | 0.024296  | 0.371472 |
| GOTERM_BP_FAT | GO:0006091~generation of precursor metabolites and energy       | 7     | 12.5     | 3.01E-04 | Q02375, P00125, Q02380, Q05752, Q02827, P52505,                                        | 40         | 211      | 8785      | 7.286137        | 0.074958   | 0.019291  | 0.392215 |

|               |                                                                   |   |          |          |                                                        |    |     |      |          |          |          |          |
|---------------|-------------------------------------------------------------------|---|----------|----------|--------------------------------------------------------|----|-----|------|----------|----------|----------|----------|
|               |                                                                   |   |          |          | P23934                                                 |    |     |      |          |          |          |          |
| GOTERM_BP_FAT | GO:0045333~cellular respiration                                   | 4 | 7.142857 | 0.001219 | Q02375, Q05752, Q02827, P52505                         | 40 | 48  | 8785 | 18.30208 | 0.270821 | 0.061213 | 1.580365 |
| GOTERM_BP_FAT | GO:0006412~translation                                            | 7 | 12.5     | 0.001412 | Q58DW0, Q3T003, Q3SZ90, P82916, Q58DT1, Q3T0D5, Q0II26 | 40 | 283 | 8785 | 5.43242  | 0.306423 | 0.05916  | 1.828538 |
| GOTERM_BP_FAT | GO:0042775~mitochondrial ATP synthesis coupled electron transport | 3 | 5.357143 | 0.00169  | Q05752, Q02827, P52505                                 | 40 | 14  | 8785 | 47.0625  | 0.354683 | 0.060656 | 2.184988 |
| GOTERM_BP_FAT | GO:0042773~ATP synthesis coupled electron transport               | 3 | 5.357143 | 0.00250  | Q05752, Q02827, P52505                                 | 40 | 17  | 8785 | 38.75735 | 0.477639 | 0.077967 | 3.222314 |
| GOTERM_BP_FAT | GO:0015980~energy derivation by oxidation of organic compounds    | 4 | 7.142857 | 0.00346  | Q02375, Q05752, Q02827, P52505                         | 40 | 69  | 8785 | 12.73188 | 0.592711 | 0.094985 | 4.42934  |
| GOTERM_BP_FAT | GO:0022904~respiratory electron transport chain                   | 3 | 5.357143 | 0.00382  | Q05752, Q02827, P52505                                 | 40 | 21  | 8785 | 31.375   | 0.629253 | 0.09446  | 4.881381 |
| GOTERM_BP_FAT | GO:0007264~small GTPase mediated signal transduction              | 5 | 8.928571 | 0.00657  | Q17R06, Q148J4, A5D977, P11023, Q3SZA6                 | 40 | 170 | 8785 | 6.459559 | 0.818562 | 0.143728 | 8.248668 |
| GOTERM_BP_FAT | GO:0006119~oxidative phosphorylation                              | 3 | 5.357143 | 0.02891  | Q05752, Q02827, P52505                                 | 40 | 60  | 8785 | 10.98125 | 0.999499 | 0.469133 | 31.83699 |

|               |                                       |   |          |          |                                |    |     |      |          |          |          |          |
|---------------|---------------------------------------|---|----------|----------|--------------------------------|----|-----|------|----------|----------|----------|----------|
| GOTERM_BP_FAT | GO:0007005~mitochondrion organization | 3 | 5.357143 | 0.03738  | Q02375, Q1LZB5, P11023         | 40 | 69  | 8785 | 9.548913 | 0.999948 | 0.531873 | 39.20567 |
| GOTERM_BP_FAT | GO:0008610~lipid biosynthetic process | 4 | 7.142857 | 0.03855  | Q58DH7, P52505, Q3ZCD7, Q2KJ28 | 40 | 169 | 8785 | 5.198225 | 0.999962 | 0.516819 | 40.16661 |
| GOTERM_BP_FAT | GO:0070271~protein complex biogenesis | 4 | 7.142857 | 0.045116 | Q02375, A0JNQ6, Q2T9S0, P18246 | 40 | 180 | 8785 | 4.880556 | 0.999994 | 0.549376 | 45.28699 |
| GOTERM_BP_FAT | GO:0006461~protein complex assembly   | 4 | 7.142857 | 0.04512  | Q02375, A0JNQ6, Q2T9S0, P18246 | 40 | 180 | 8785 | 4.880556 | 0.999994 | 0.549376 | 45.28699 |

## Cluster 2

| Category      | Term                                  | Count | %        | P Value | Genes          | List Total | Pop Hits | Pop Total | Fold Enrichment | Bonferroni | Benjamini | FDR      |
|---------------|---------------------------------------|-------|----------|---------|----------------|------------|----------|-----------|-----------------|------------|-----------|----------|
| GOTERM_BP_FAT | GO:0008610~lipid biosynthetic process | 2     | 18.18182 | 0.07477 | P80177, Q0VCY6 | 5          | 169      | 8785      | 20.7929         | 0.992523   | 0.992523  | 54.47378 |

### Cluster 3

| Category      | Term                                                  | Count | %        | P Value  | Genes                          | List Total | Pop Hits | Pop Total | Fold Enrichment | Bonferroni | Benjamini | FDR      |
|---------------|-------------------------------------------------------|-------|----------|----------|--------------------------------|------------|----------|-----------|-----------------|------------|-----------|----------|
| GOTERM_BP_FAT | GO:0018130~heterocycle biosynthetic process           | 4     | 19.04762 | 3.41E-05 | P56658, Q3SZ18, Q58DK5, Q3ZBD3 | 17         | 36       | 8785      | 57.4183         | 0.012883   | 0.012883  | 0.047228 |
| GOTERM_BP_FAT | GO:0046148~pigment biosynthetic process               | 3     | 14.28571 | 5.80E-04 | P56658, A5PK65, Q58DK5         | 17         | 20       | 8785      | 77.51471        | 0.19777    | 0.104327  | 0.799586 |
| GOTERM_BP_FAT | GO:0042440~pigment metabolic process                  | 3     | 14.28571 | 9.11E-04 | P56658, A5PK65, Q58DK5         | 17         | 25       | 8785      | 62.01176        | 0.292594   | 0.108976  | 1.253155 |
| GOTERM_BP_FAT | GO:0046100~hypoxanthine metabolic process             | 2     | 9.52381  | 0.005455 | P56658, Q3SZ18                 | 17         | 3        | 8785      | 344.5098        | 0.874869   | 0.405241  | 7.292311 |
| GOTERM_BP_FAT | GO:0043101~purine salvage                             | 2     | 9.52381  | 0.007267 | P56658, Q3SZ18                 | 17         | 4        | 8785      | 258.3824        | 0.937423   | 0.425509  | 9.603453 |
| GOTERM_BP_FAT | GO:0044271~nitrogen compound biosynthetic process     | 4     | 19.04762 | 0.008965 | P56658, Q3SZ18, Q58DK5, Q3ZBD3 | 17         | 243      | 8785      | 8.506415        | 0.96736    | 0.434684  | 11.72173 |
| GOTERM_BP_FAT | GO:0043094~cellular metabolic compound salvage        | 2     | 9.52381  | 0.010881 | P56658, Q3SZ18                 | 17         | 6        | 8785      | 172.2549        | 0.984353   | 0.447846  | 14.05507 |
| GOTERM_BP_FAT | GO:0009163~nucleoside biosynthetic process            | 2     | 9.52381  | 0.012684 | P56658, Q3SZ18                 | 17         | 7        | 8785      | 147.6471        | 0.992177   | 0.454655  | 16.19834 |
| GOTERM_BP_FAT | GO:0042455~ribonucleoside biosynthetic process        | 2     | 9.52381  | 0.012684 | P56658, Q3SZ18                 | 17         | 7        | 8785      | 147.6471        | 0.992177   | 0.454655  | 16.19834 |
| GOTERM_BP_FAT | GO:0046129~purine ribonucleoside biosynthetic process | 2     | 9.52381  | 0.012684 | P56658, Q3SZ18                 | 17         | 7        | 8785      | 147.6471        | 0.992177   | 0.454655  | 16.19834 |
| GOTERM_BP_FAT | GO:0042451~purine                                     | 2     | 9.52381  | 0.012684 | P56658,                        | 17         | 7        | 8785      | 147.6471        | 0.992177   | 0.454655  | 16.19834 |

|               |                                                    |   |          |          |                        |    |     |      |          |          |          |          |
|---------------|----------------------------------------------------|---|----------|----------|------------------------|----|-----|------|----------|----------|----------|----------|
|               | nucleoside biosynthetic process                    |   |          |          | Q3SZ18                 |    |     |      |          |          |          |          |
| GOTERM_BP_FAT | GO:0051289~protein homotetramerization             | 2 | 9.52381  | 0.01628  | Q3SZ18, Q3ZBD3         | 17 | 9   | 8785 | 114.8366 | 0.998045 | 0.499944 | 20.32657 |
| GOTERM_BP_FAT | GO:0006144~purine base metabolic process           | 2 | 9.52381  | 0.019864 | P56658, Q3SZ18         | 17 | 11  | 8785 | 93.95722 | 0.999512 | 0.533467 | 24.2523  |
| GOTERM_BP_FAT | GO:0042278~purine nucleoside metabolic process     | 2 | 9.52381  | 0.021651 | P56658, Q3SZ18         | 17 | 12  | 8785 | 86.12745 | 0.999756 | 0.530538 | 26.14234 |
| GOTERM_BP_FAT | GO:0046128~purine ribonucleoside metabolic process | 2 | 9.52381  | 0.021651 | P56658, Q3SZ18         | 17 | 12  | 8785 | 86.12745 | 0.999756 | 0.530538 | 26.14234 |
| GOTERM_BP_FAT | GO:0009112~nucleobase metabolic process            | 2 | 9.52381  | 0.025217 | P56658, Q3SZ18         | 17 | 14  | 8785 | 73.82353 | 0.999939 | 0.554595 | 29.78273 |
| GOTERM_BP_FAT | GO:0051262~protein tetramerization                 | 2 | 9.52381  | 0.032311 | Q3SZ18, Q3ZBD3         | 17 | 18  | 8785 | 57.4183  | 0.999996 | 0.617138 | 36.53625 |
| GOTERM_BP_FAT | GO:0070271~protein complex biogenesis              | 3 | 14.28571 | 0.041501 | Q17Q89, Q3SZ18, Q3ZBD3 | 17 | 180 | 8785 | 8.612745 | 1        | 0.683519 | 44.38936 |
| GOTERM_BP_FAT | GO:0006461~protein complex assembly                | 3 | 14.28571 | 0.041501 | Q17Q89, Q3SZ18, Q3ZBD3 | 17 | 180 | 8785 | 8.612745 | 1        | 0.683519 | 44.38936 |
| GOTERM_BP_FAT | GO:0009119~ribonucleoside metabolic process        | 2 | 9.52381  | 0.042862 | P56658, Q3SZ18         | 17 | 24  | 8785 | 43.06373 | 1        | 0.670377 | 45.47311 |

## Cluster 4

| Category      | Term                                                     | Count | %        | P Value  | Genes                          | List Total | Pop Hits | Pop Total | Fold Enrichment | Bonferroni | Benjamini | FDR      |
|---------------|----------------------------------------------------------|-------|----------|----------|--------------------------------|------------|----------|-----------|-----------------|------------|-----------|----------|
| GOTERM_BP_FAT | GO:0007059~chromosome segregation                        | 3     | 10.71429 | 0.001558 | Q2YDJ0, Q08DR9, Q3SZY3         | 19         | 29       | 8785      | 47.83122        | 0.212242   | 0.212242  | 1.851031 |
| GOTERM_BP_FAT | GO:0007017~microtubule-based process                     | 4     | 14.28571 | 0.002344 | Q2YDJ0, Q08DR9, Q3MHR3, A6QPE8 | 19         | 133      | 8785      | 13.90582        | 0.301642   | 0.164322  | 2.772618 |
| GOTERM_BP_FAT | GO:0040001~establishment of mitotic spindle localization | 2     | 7.142857 | 0.006135 | Q2YDJ0, Q08DR9                 | 19         | 3        | 8785      | 308.2456        | 0.609973   | 0.269369  | 7.108575 |
| GOTERM_BP_FAT | GO:0051653~spindle localization                          | 2     | 7.142857 | 0.008172 | Q2YDJ0, Q08DR9                 | 19         | 4        | 8785      | 231.1842        | 0.715054   | 0.269382  | 9.364486 |
| GOTERM_BP_FAT | GO:0051293~establishment of spindle localization         | 2     | 7.142857 | 0.008172 | Q2YDJ0, Q08DR9                 | 19         | 4        | 8785      | 231.1842        | 0.715054   | 0.269382  | 9.364486 |
| GOTERM_BP_FAT | GO:0007067~mitosis                                       | 3     | 10.71429 | 0.011129 | Q2YDJ0, Q08DR9, Q3SZY3         | 19         | 79       | 8785      | 17.55829        | 0.819541   | 0.289971  | 12.54965 |
| GOTERM_BP_FAT | GO:0000280~nuclear division                              | 3     | 10.71429 | 0.011129 | Q2YDJ0, Q08DR9, Q3SZY3         | 19         | 79       | 8785      | 17.55829        | 0.819541   | 0.289971  | 12.54965 |
| GOTERM_BP_FAT | GO:0000087~M phase of mitotic cell cycle                 | 3     | 10.71429 | 0.012233 | Q2YDJ0, Q08DR9, Q3SZY3         | 19         | 83       | 8785      | 16.71211        | 0.847887   | 0.269375  | 13.71218 |
| GOTERM_BP_FAT | GO:0048285~organelle fission                             | 3     | 10.71429 | 0.012516 | Q2YDJ0, Q08DR9, Q3SZY3         | 19         | 84       | 8785      | 16.51316        | 0.854416   | 0.240645  | 14.00818 |
| GOTERM_BP_FAT | GO:0051276~chromosome organization                       | 4     | 14.28571 | 0.013252 | Q2YDJ0, Q08DR9, Q3SZY3, Q24K09 | 19         | 248      | 8785      | 7.457555        | 0.870113   | 0.225189  | 14.77309 |

|               |                                                    |   |          |          |                        |    |     |      |          |          |          |          |
|---------------|----------------------------------------------------|---|----------|----------|------------------------|----|-----|------|----------|----------|----------|----------|
| GOTERM_BP_FAT | GO:000070~mitotic sister chromatid segregation     | 2 | 7.142857 | 0.020312 | Q2YDJ0, Q08DR9         | 19 | 10  | 8785 | 92.47368 | 0.956705 | 0.294506 | 21.79951 |
| GOTERM_BP_FAT | GO:0000819~sister chromatid segregation            | 2 | 7.142857 | 0.020312 | Q2YDJ0, Q08DR9         | 19 | 10  | 8785 | 92.47368 | 0.956705 | 0.294506 | 21.79951 |
| GOTERM_BP_FAT | GO:0000279~M phase                                 | 3 | 10.71429 | 0.021216 | Q2YDJ0, Q08DR9, Q3SZY3 | 19 | 111 | 8785 | 12.49644 | 0.962409 | 0.279708 | 22.65991 |
| GOTERM_BP_FAT | GO:0000278~mitotic cell cycle                      | 3 | 10.71429 | 0.021938 | Q2YDJ0, Q08DR9, Q3SZY3 | 19 | 113 | 8785 | 12.27527 | 0.966422 | 0.265478 | 23.34076 |
| GOTERM_BP_FAT | GO:0022403~cell cycle phase                        | 3 | 10.71429 | 0.032225 | Q2YDJ0, Q08DR9, Q3SZY3 | 19 | 139 | 8785 | 9.979175 | 0.99334  | 0.341399 | 32.46327 |
| GOTERM_BP_FAT | GO:0051656~establishment of organelle localization | 2 | 7.142857 | 0.038259 | Q2YDJ0, Q08DR9         | 19 | 19  | 8785 | 48.67036 | 0.997442 | 0.368159 | 37.33951 |



## Cluster 5

| Category      | Term                                                 | Count | %        | P Value  | Genes                                                                    | List Total | Pop Hits | Pop Total | Fold Enrichment | Bonferroni | Benjamini | FDR      |
|---------------|------------------------------------------------------|-------|----------|----------|--------------------------------------------------------------------------|------------|----------|-----------|-----------------|------------|-----------|----------|
| GOTERM_BP_FAT | GO:0055114~oxidation reduction                       | 7     | 19.44444 | 0.002099 | P17694,<br>Q85BD6,<br>P21839,<br>P48644,<br>Q6B4J2,<br>Q1JQD0,<br>Q02367 | 25         | 513      | 8785      | 4.794932        | 0.372799   | 0.372799  | 2.64316  |
| GOTERM_BP_FAT | GO:0055085~transmembrane transport                   | 6     | 16.66667 | 0.00351  | Q3ZBB0,<br>Q4F894,<br>Q5EA68,<br>Q2KHX4,<br>P12234,<br>A7YY65            | 25         | 389      | 8785      | 5.420051        | 0.541859   | 0.323139  | 4.383358 |
| GOTERM_BP_FAT | GO:0022900~electron transport chain                  | 3     | 8.333333 | 0.023234 | P17694,<br>Q85BD6,<br>Q02367                                             | 25         | 87       | 8785      | 12.11724        | 0.994587   | 0.824413  | 25.89471 |
| GOTERM_BP_FAT | GO:0006487~protein amino acid N-linked glycosylation | 2     | 5.555556 | 0.029661 | Q0P5D9,<br>Q3SZI6                                                        | 25         | 11       | 8785      | 63.89091        | 0.99875    | 0.811956  | 31.87555 |

**Table S5. List of primer sequences for Real-time Quantitative RT-PCR analysis.**

| <b>Gene</b>                     | <b>Primer name</b> | <b>Sequences(5'-3')</b> | <b>Fragments size (bp)</b> |
|---------------------------------|--------------------|-------------------------|----------------------------|
| <b>MYH10</b>                    | Forward            | ATGCCTCCACACATCTACGC    | 201                        |
|                                 | Reverse            | CCGTTCAAGTTCCCCAGGAAT   |                            |
| <b>MYH9</b>                     | Forward            | TTTTGTGCACGGGTGAGTCT    | 247                        |
|                                 | Reverse            | GCTCCCACGATGTAGCCATT    |                            |
| <b>KIF20A</b>                   | Forward            | TGGAGTCACCAACTCAGGGA    | 238                        |
|                                 | Reverse            | GGACAGCTCCTCCTCTTGGA    |                            |
| <b>KIF2C</b>                    | Forward            | CAGTTTACGCGGCGTTAGGA    | 152                        |
|                                 | Reverse            | AATTATGCCATTACTGCGCTGG  |                            |
| <b>DYNLL2</b>                   | Forward            | ACTCGCCTCTGTGAAGTGTC    | 206                        |
|                                 | Reverse            | ATTTCGGCCCACGATACAGT    |                            |
| <b><math>\beta</math>-actin</b> | Forward            | ACCGCAAATGCTTCTAGG      | 200                        |
|                                 | Reverse            | ATCCAACCGACTGCTGTC      |                            |
